# Supplementary material for: An integrated comparative phosphoproteomic and bioinformatic approach reveals a novel class of MPM-2 motifs upregulated in EGFRvIII-expressing glioblastoma cells
Source: Royal Society of Chemistry journal article supplement (doi:10.1039/b815075c), 2008-10-30

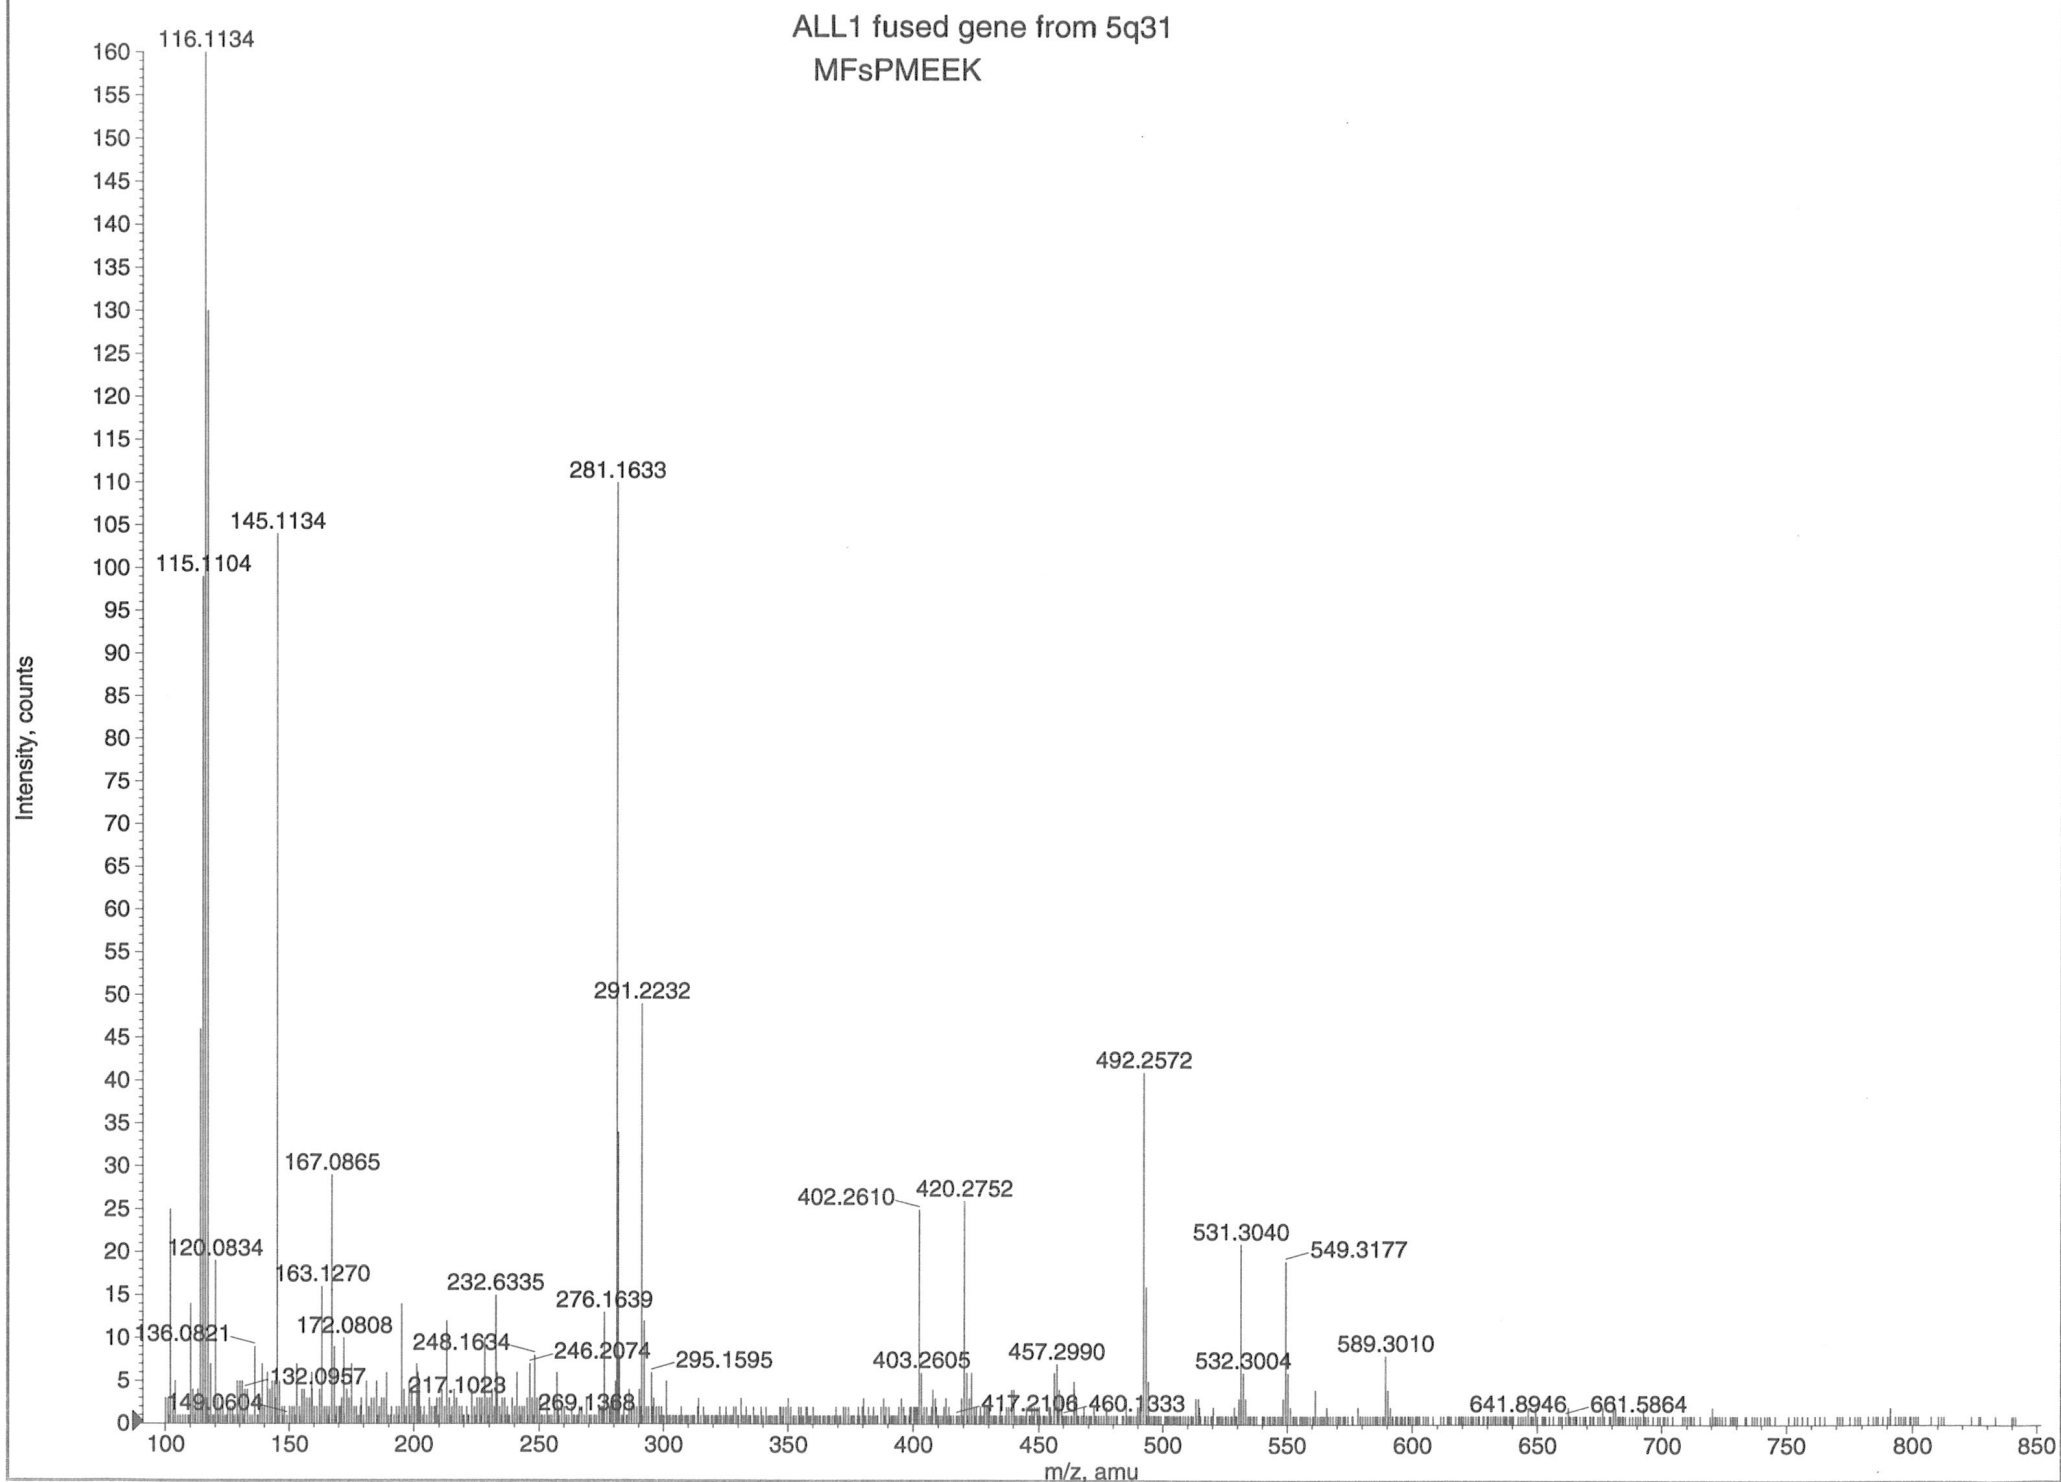

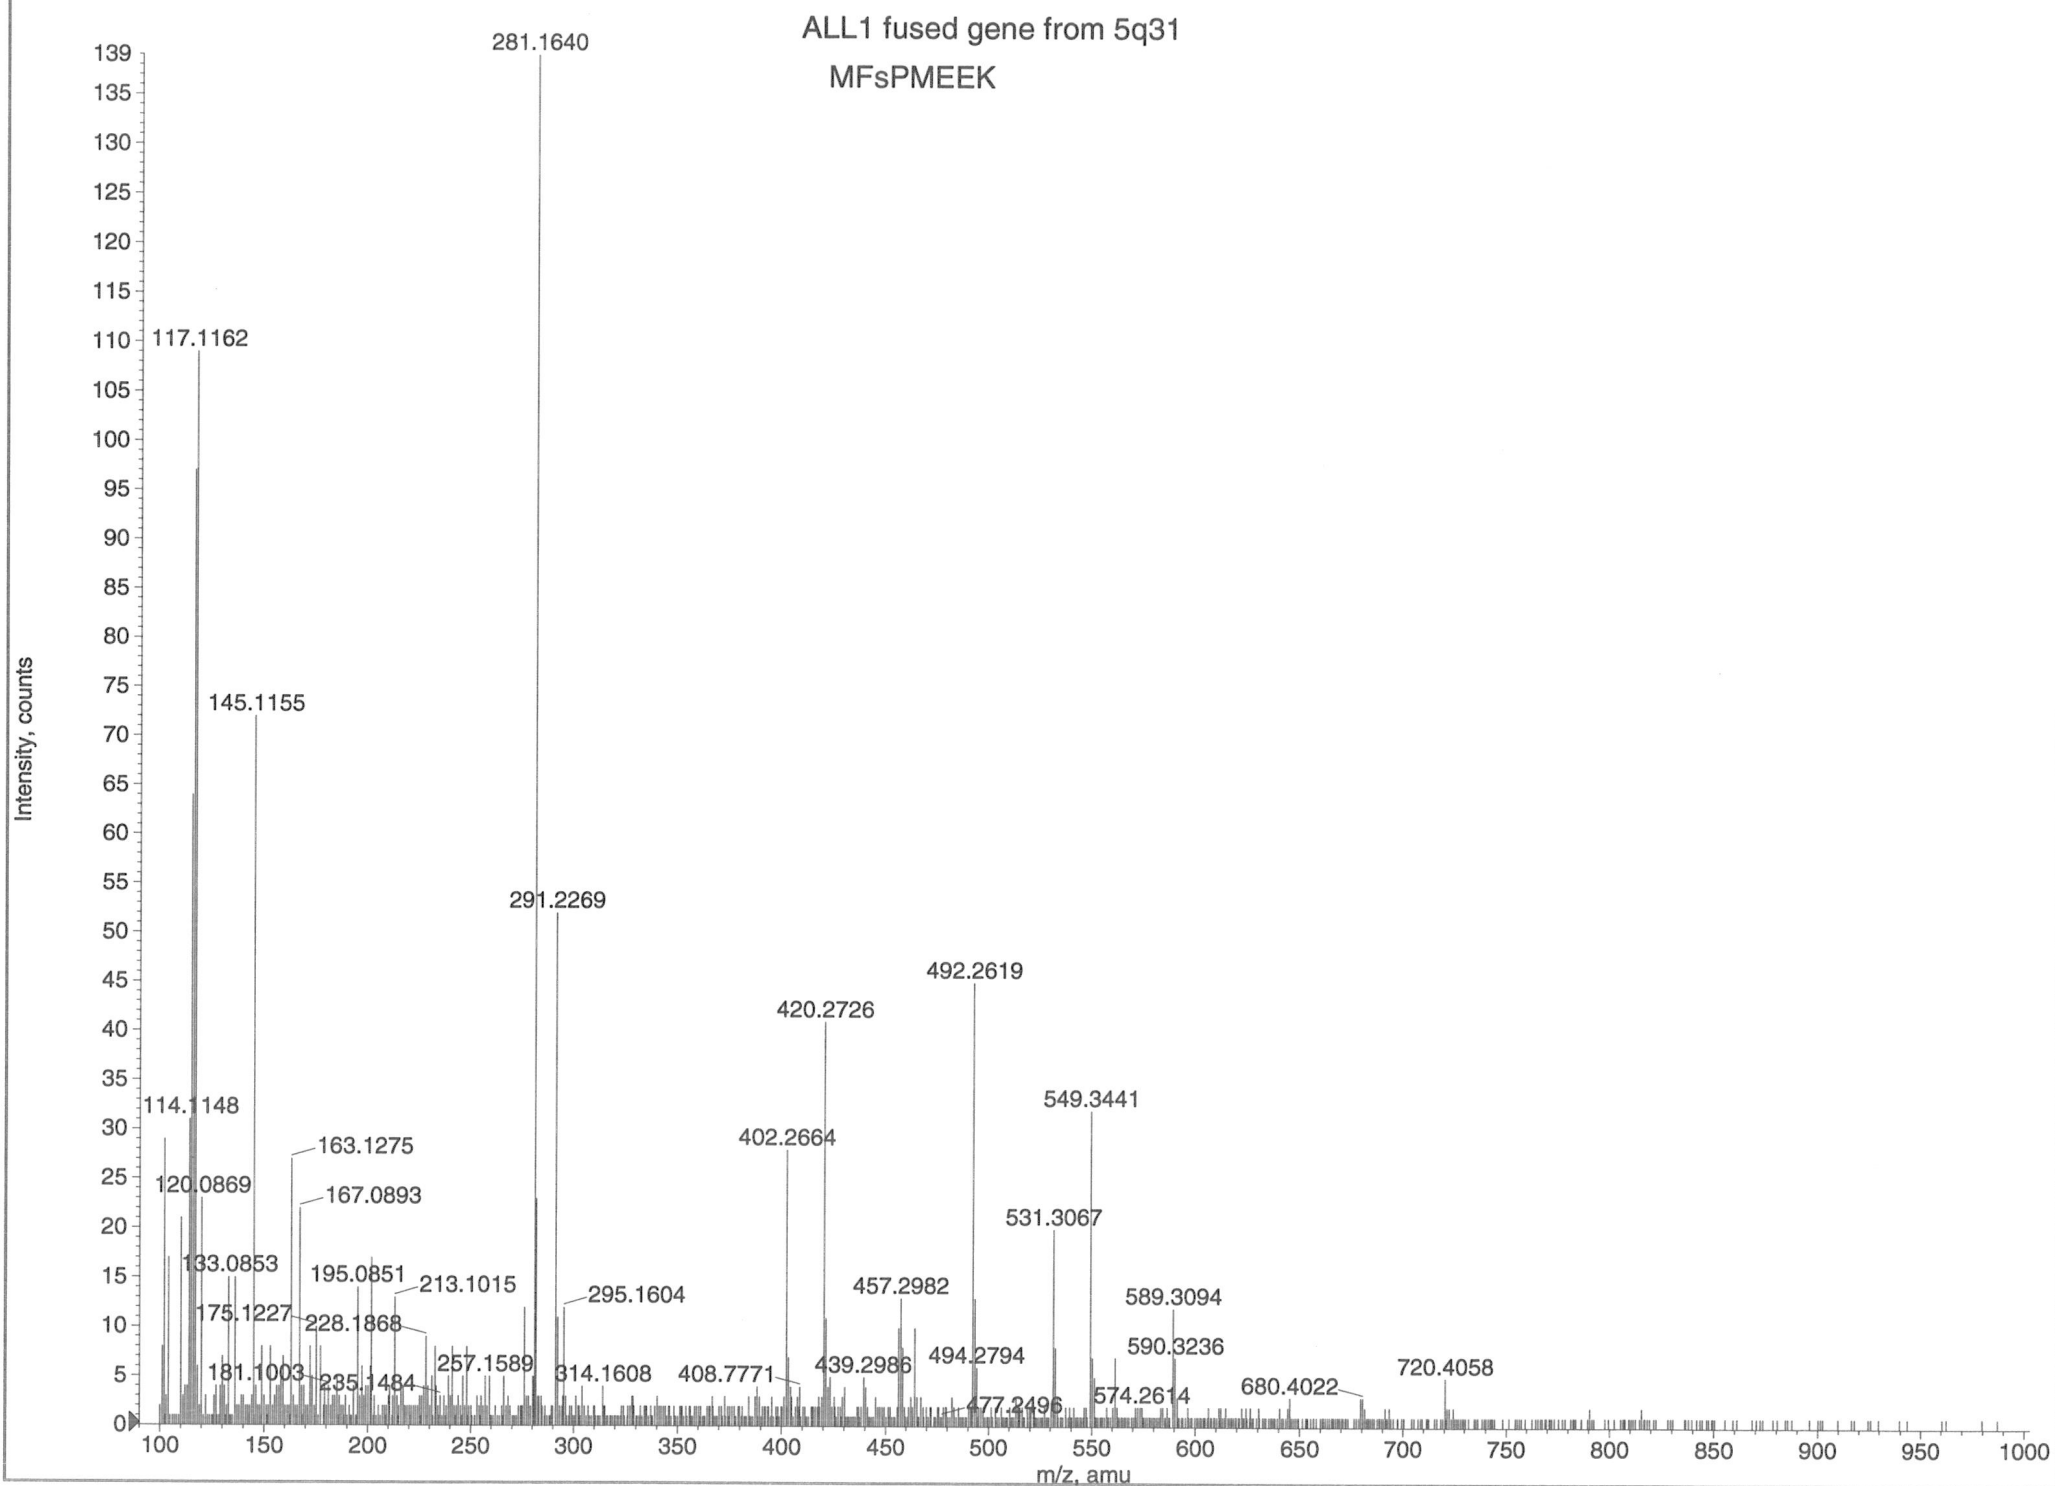



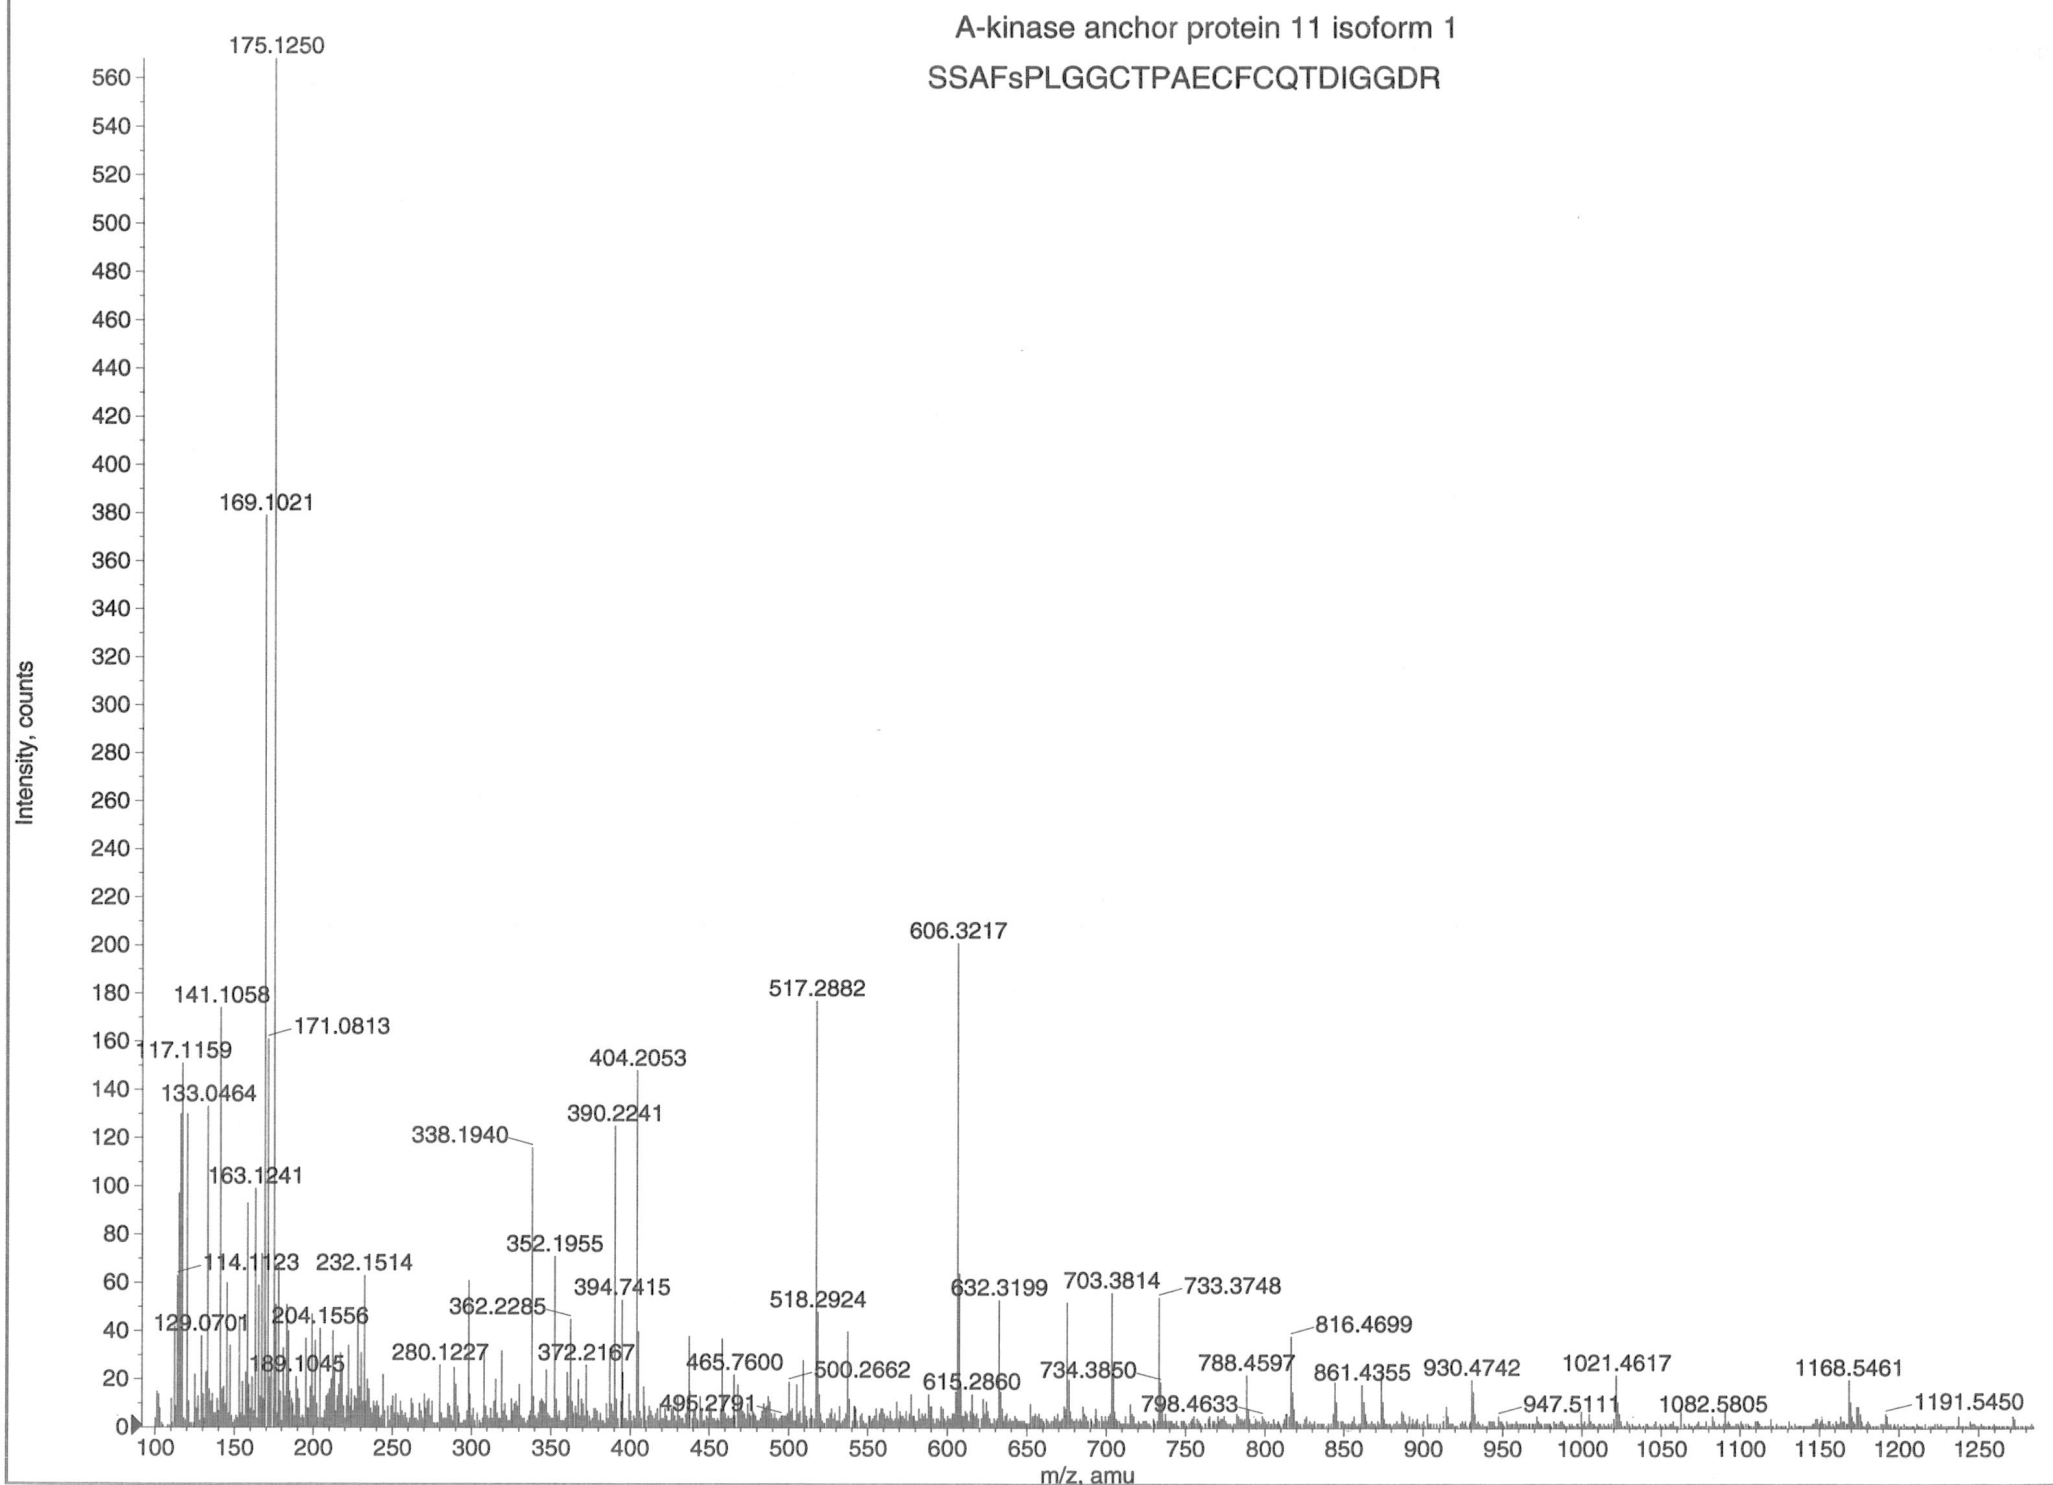

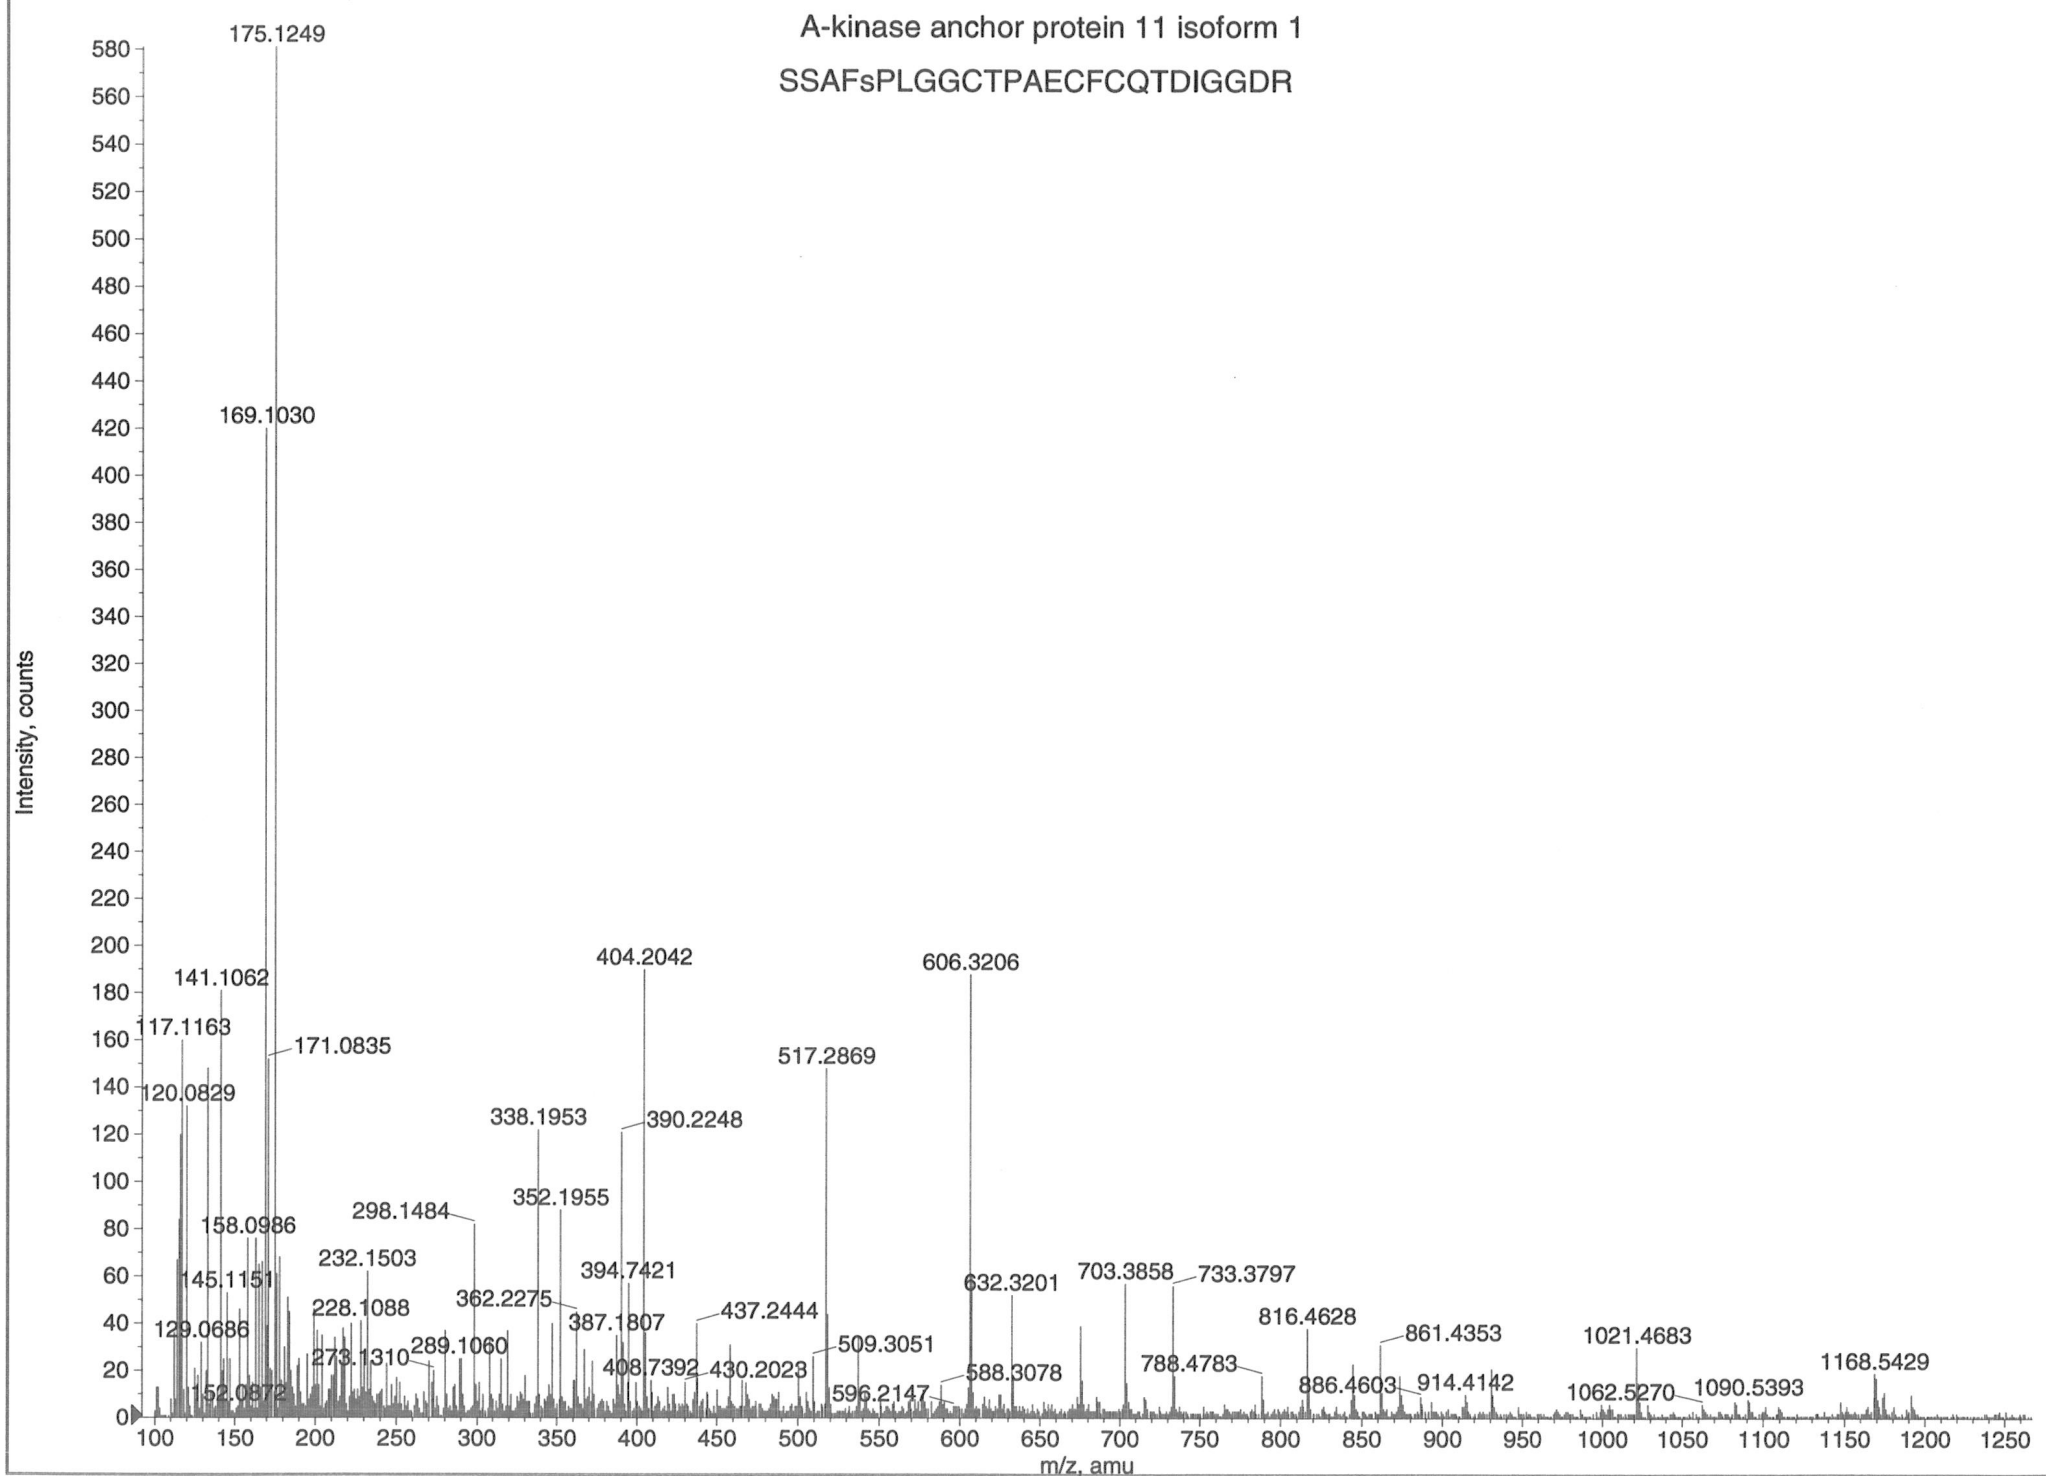

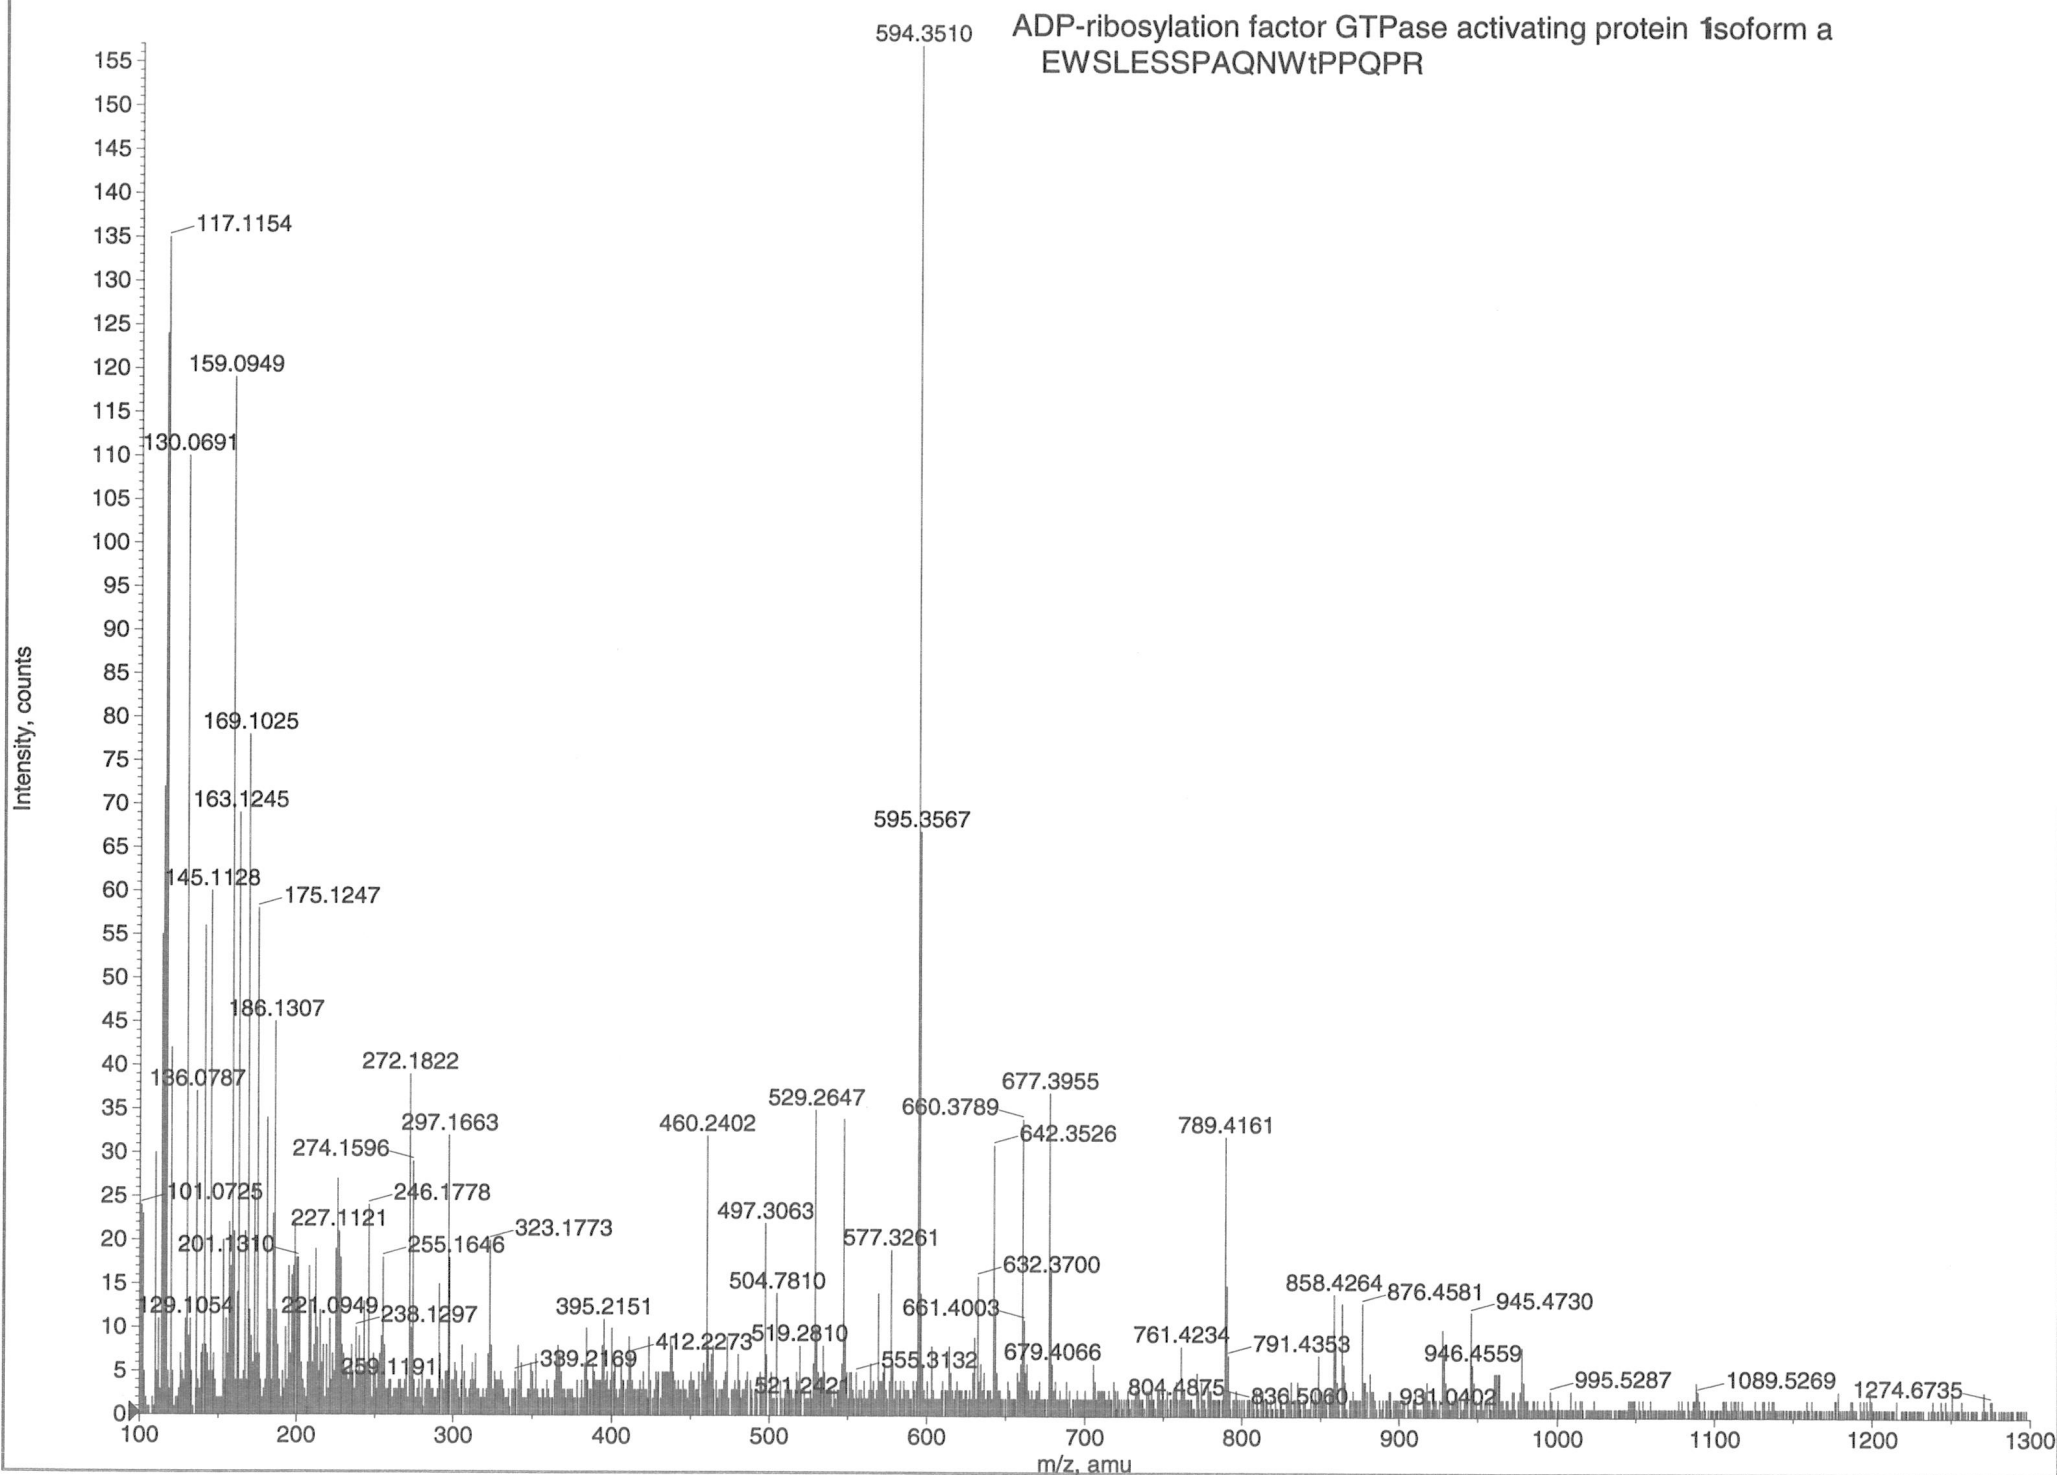

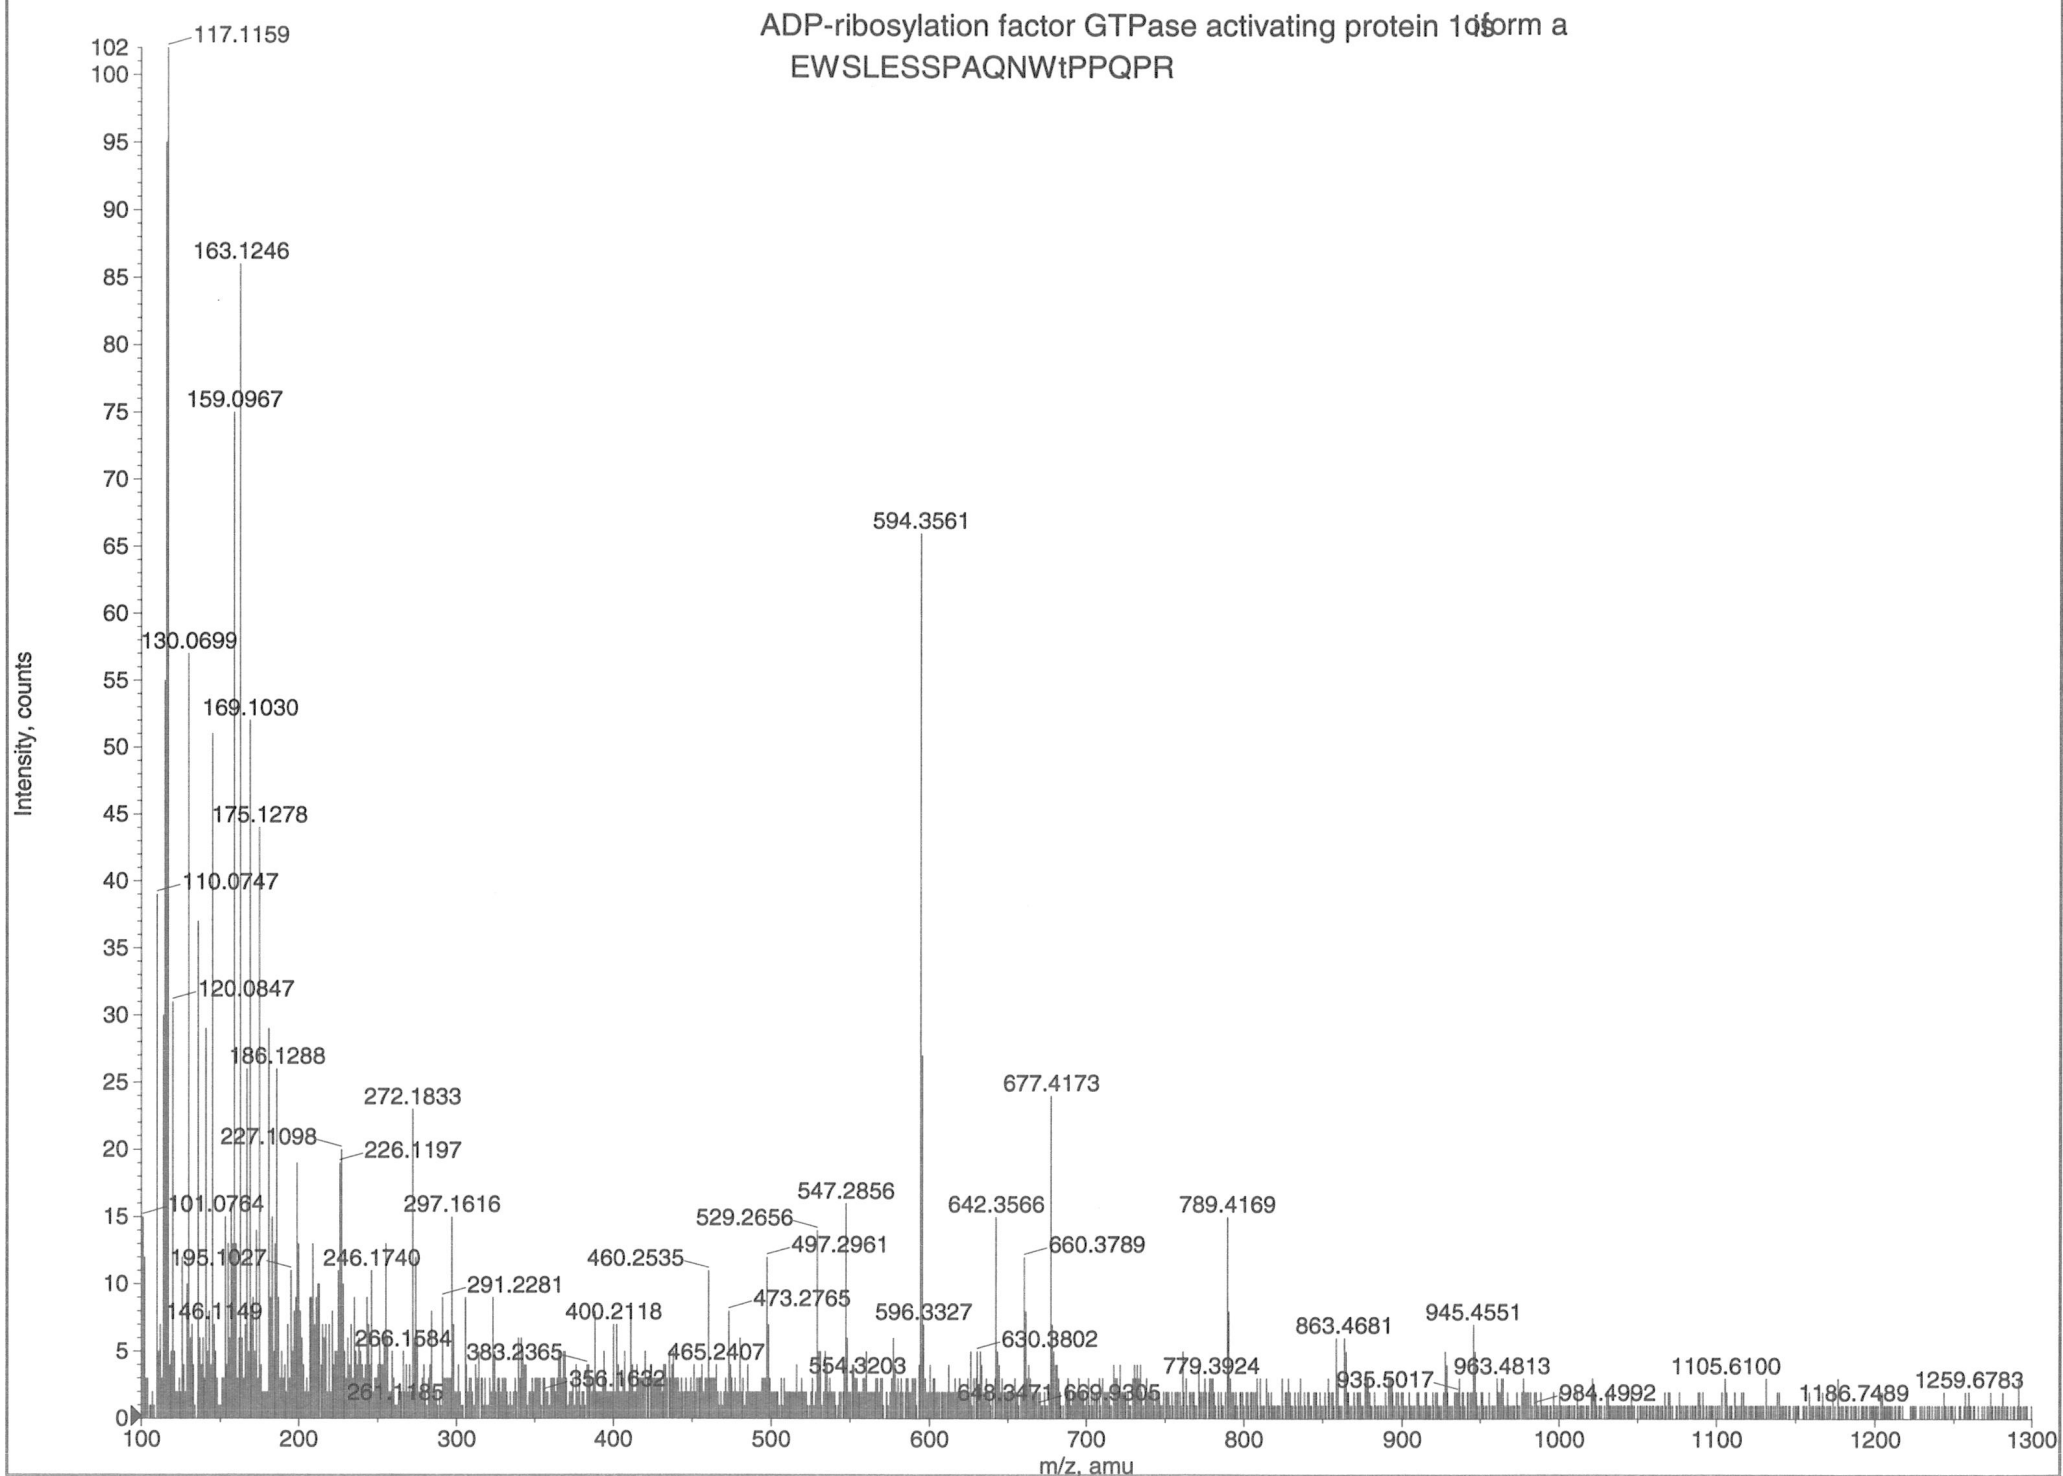

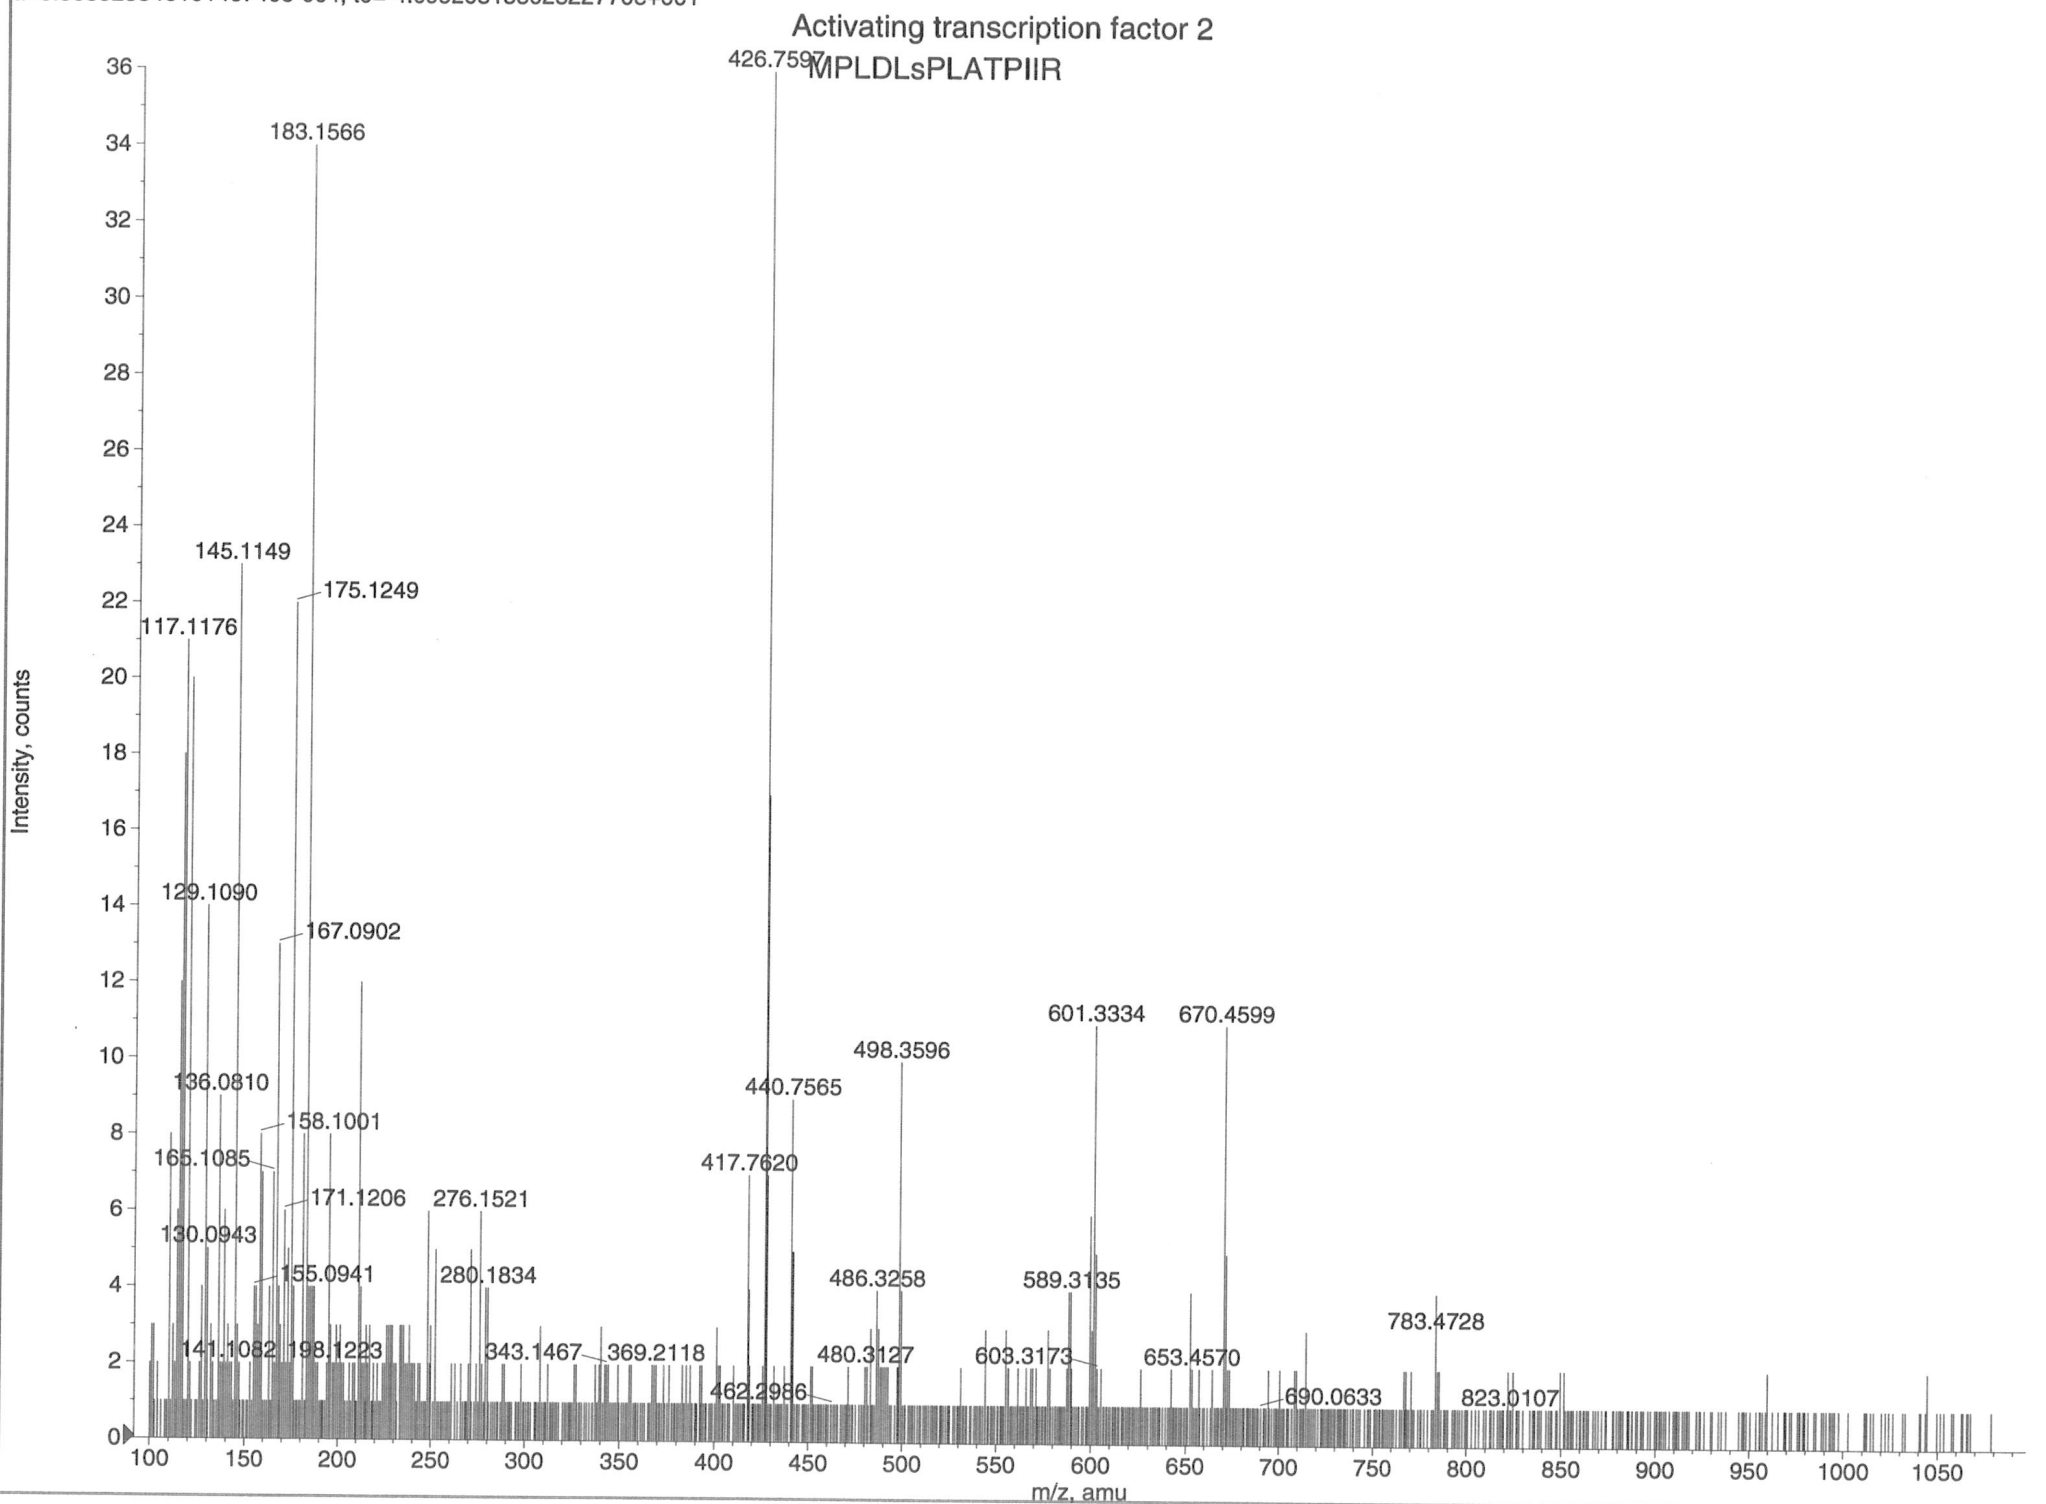

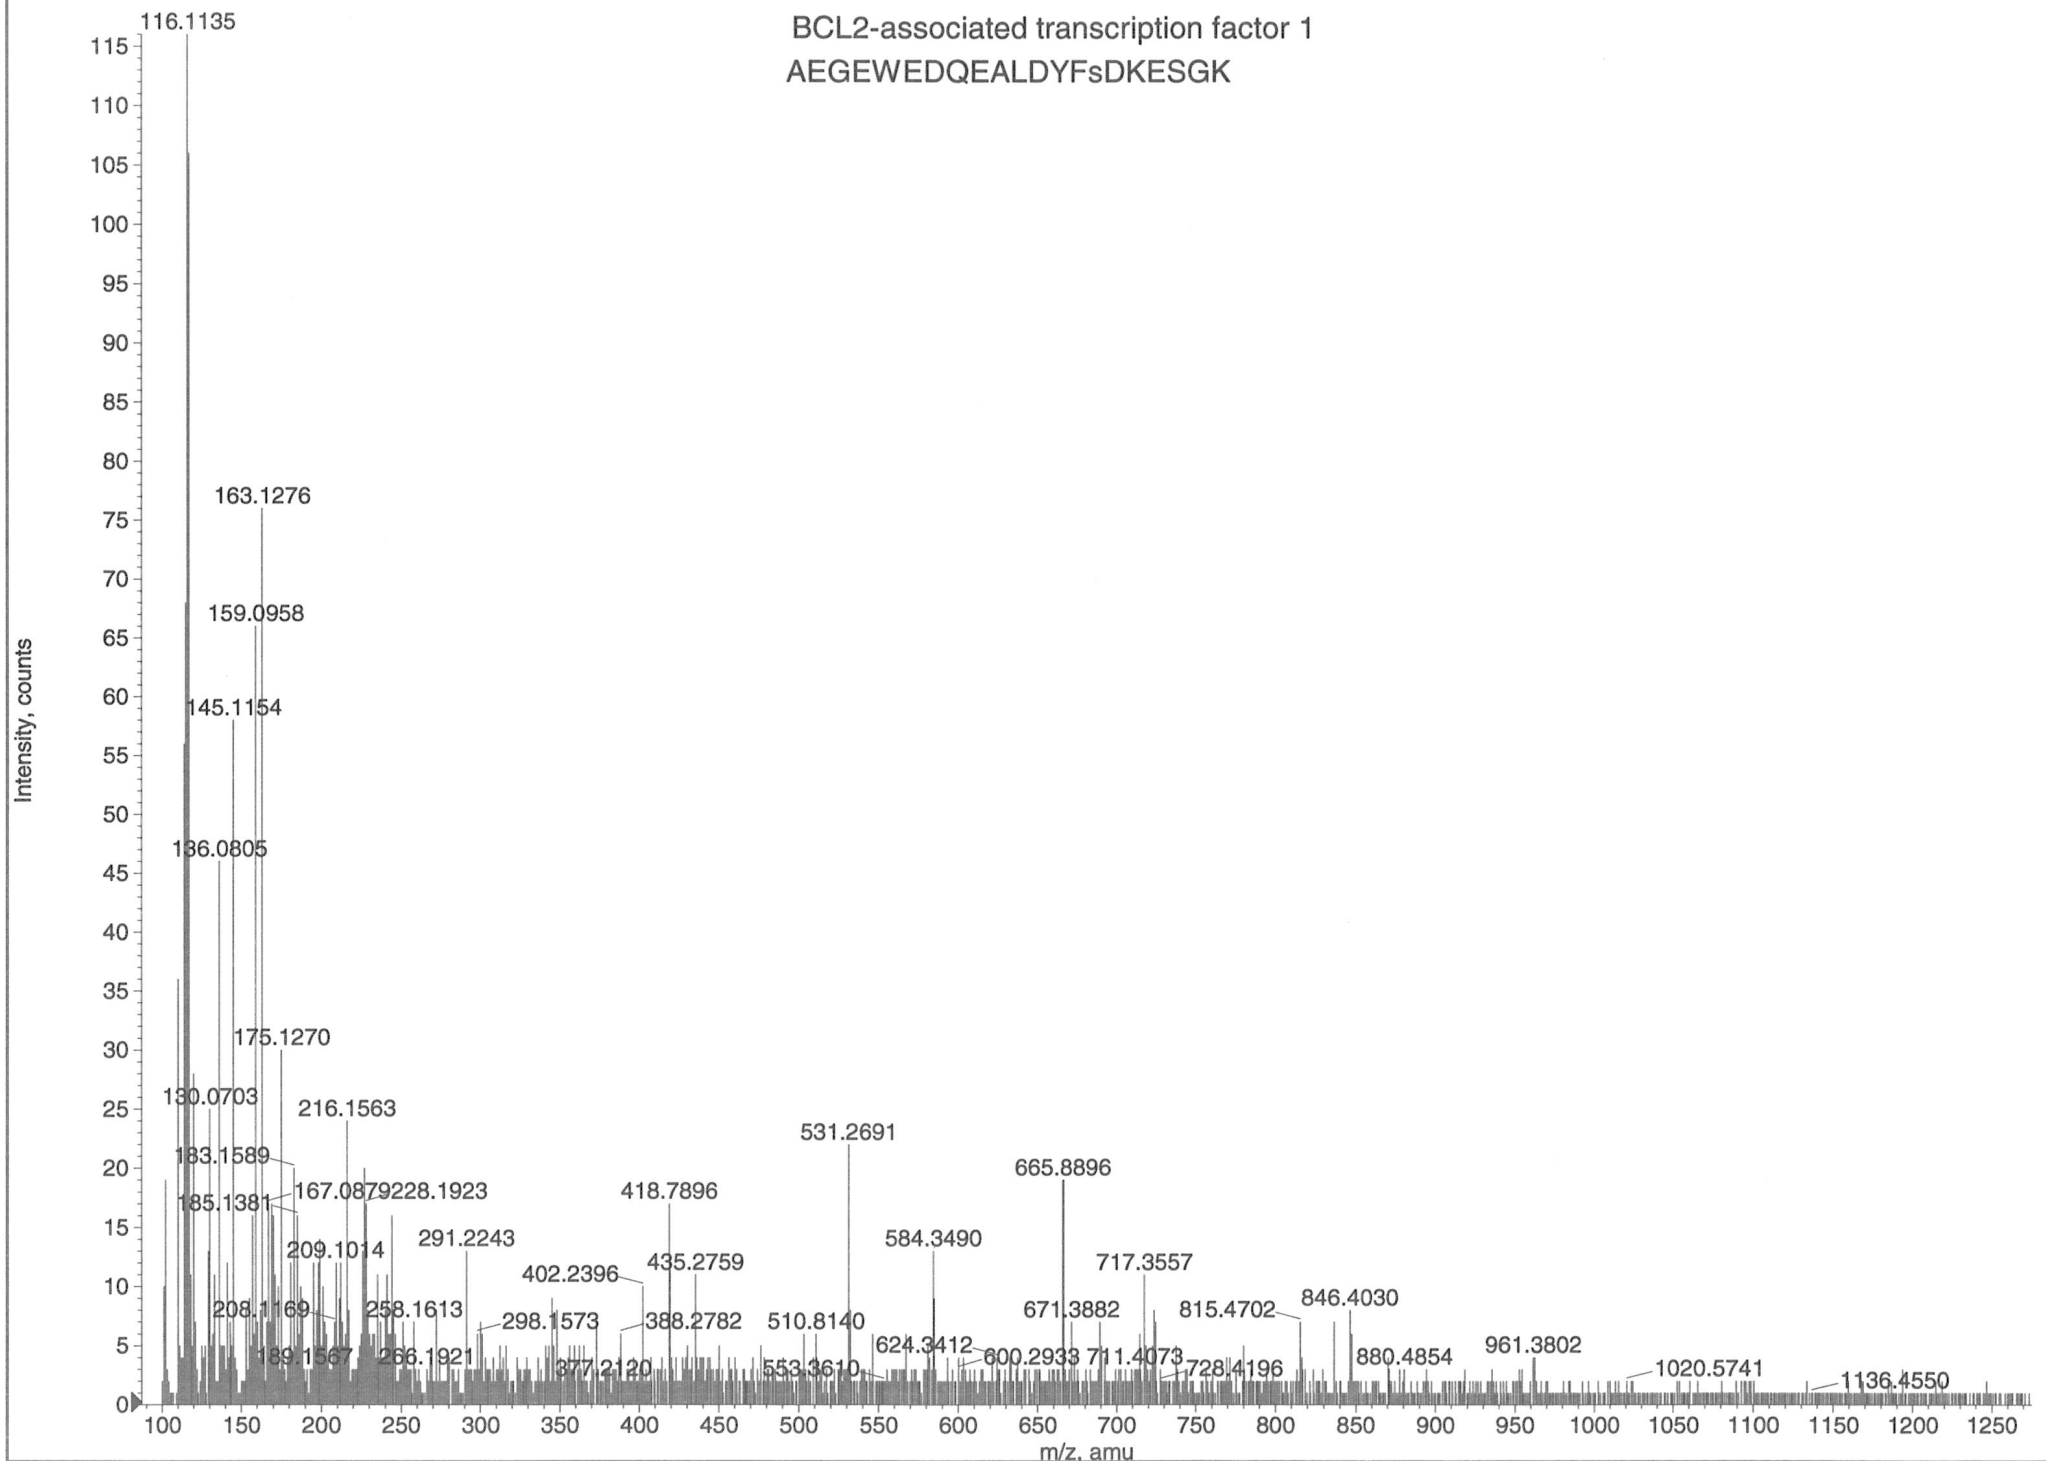

Chromosome 14 open reading frame 106

EFLEQLPKDDHDDFFSTtPLQHQR

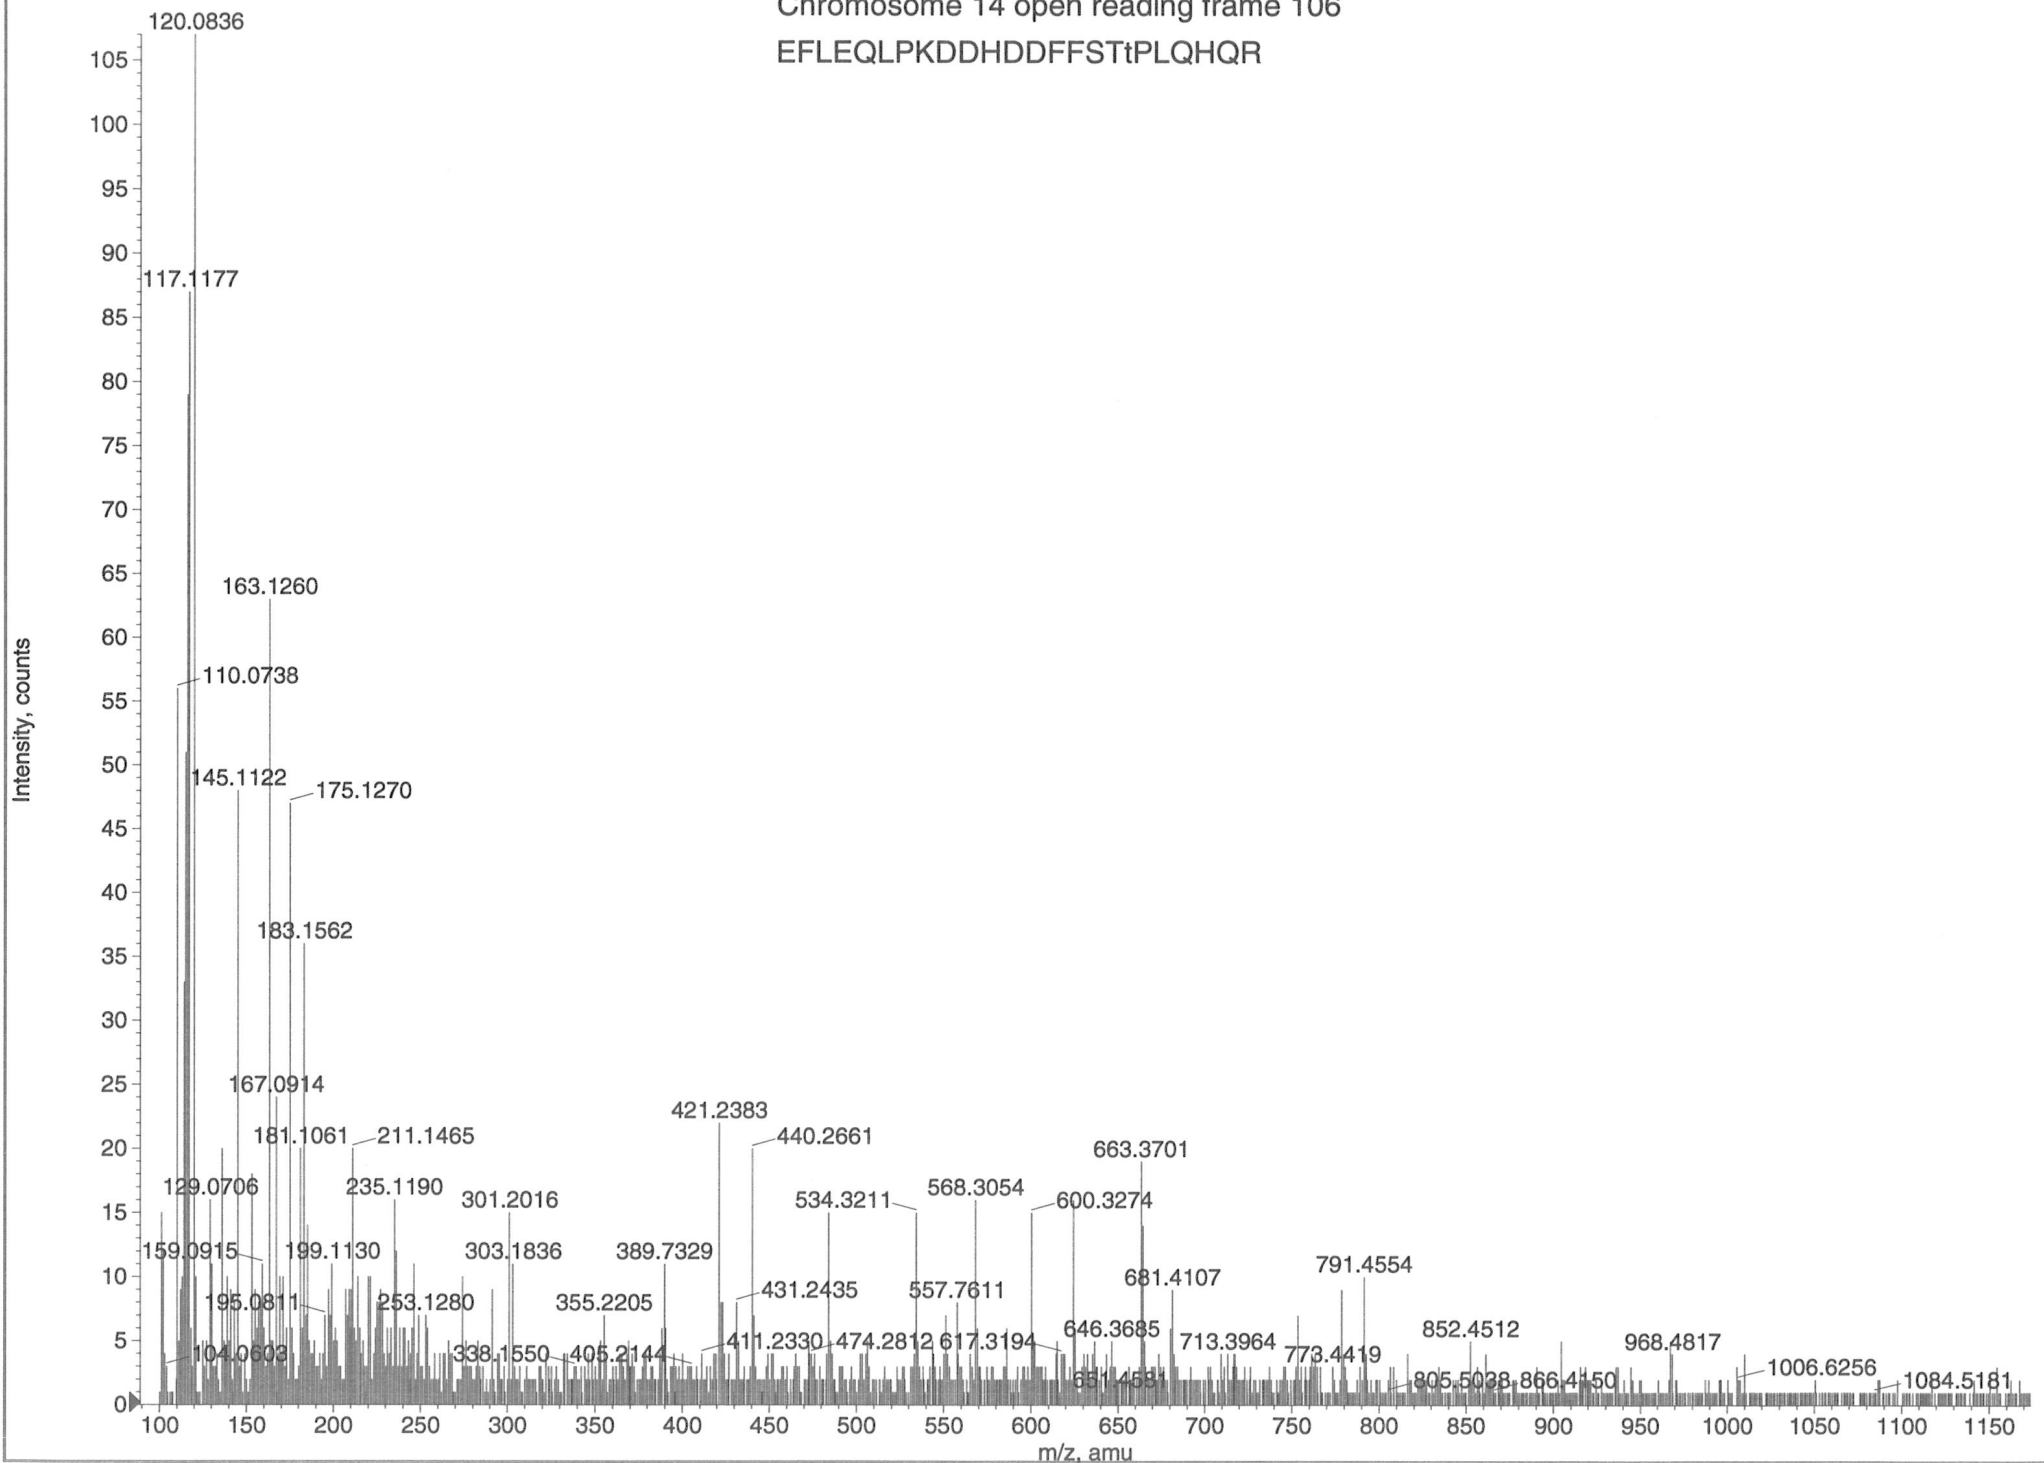

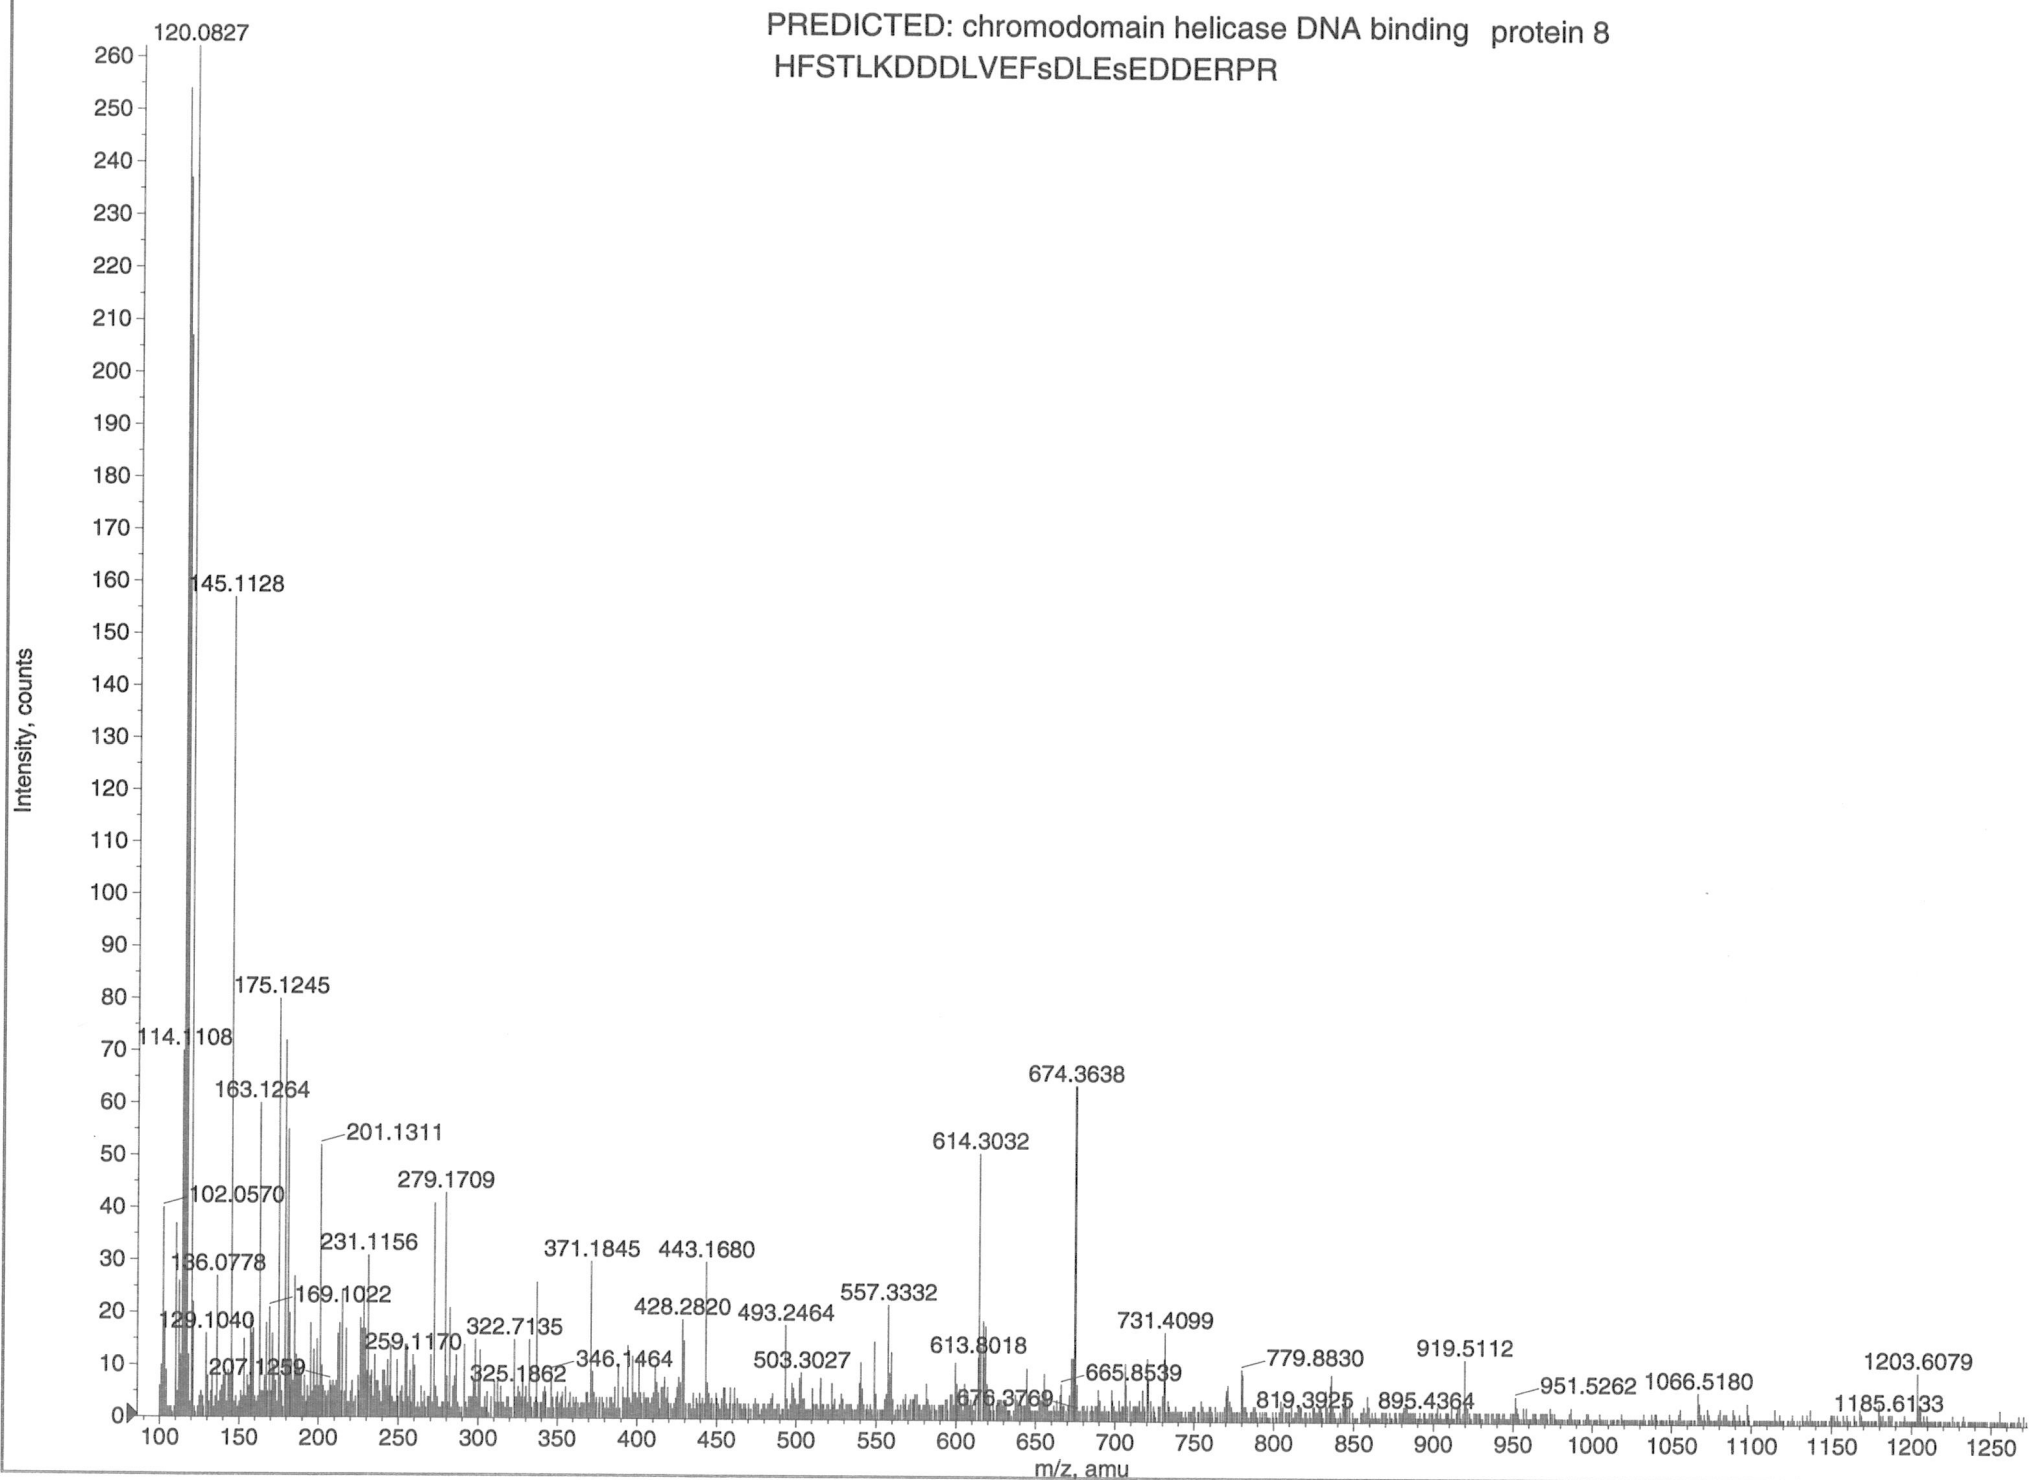



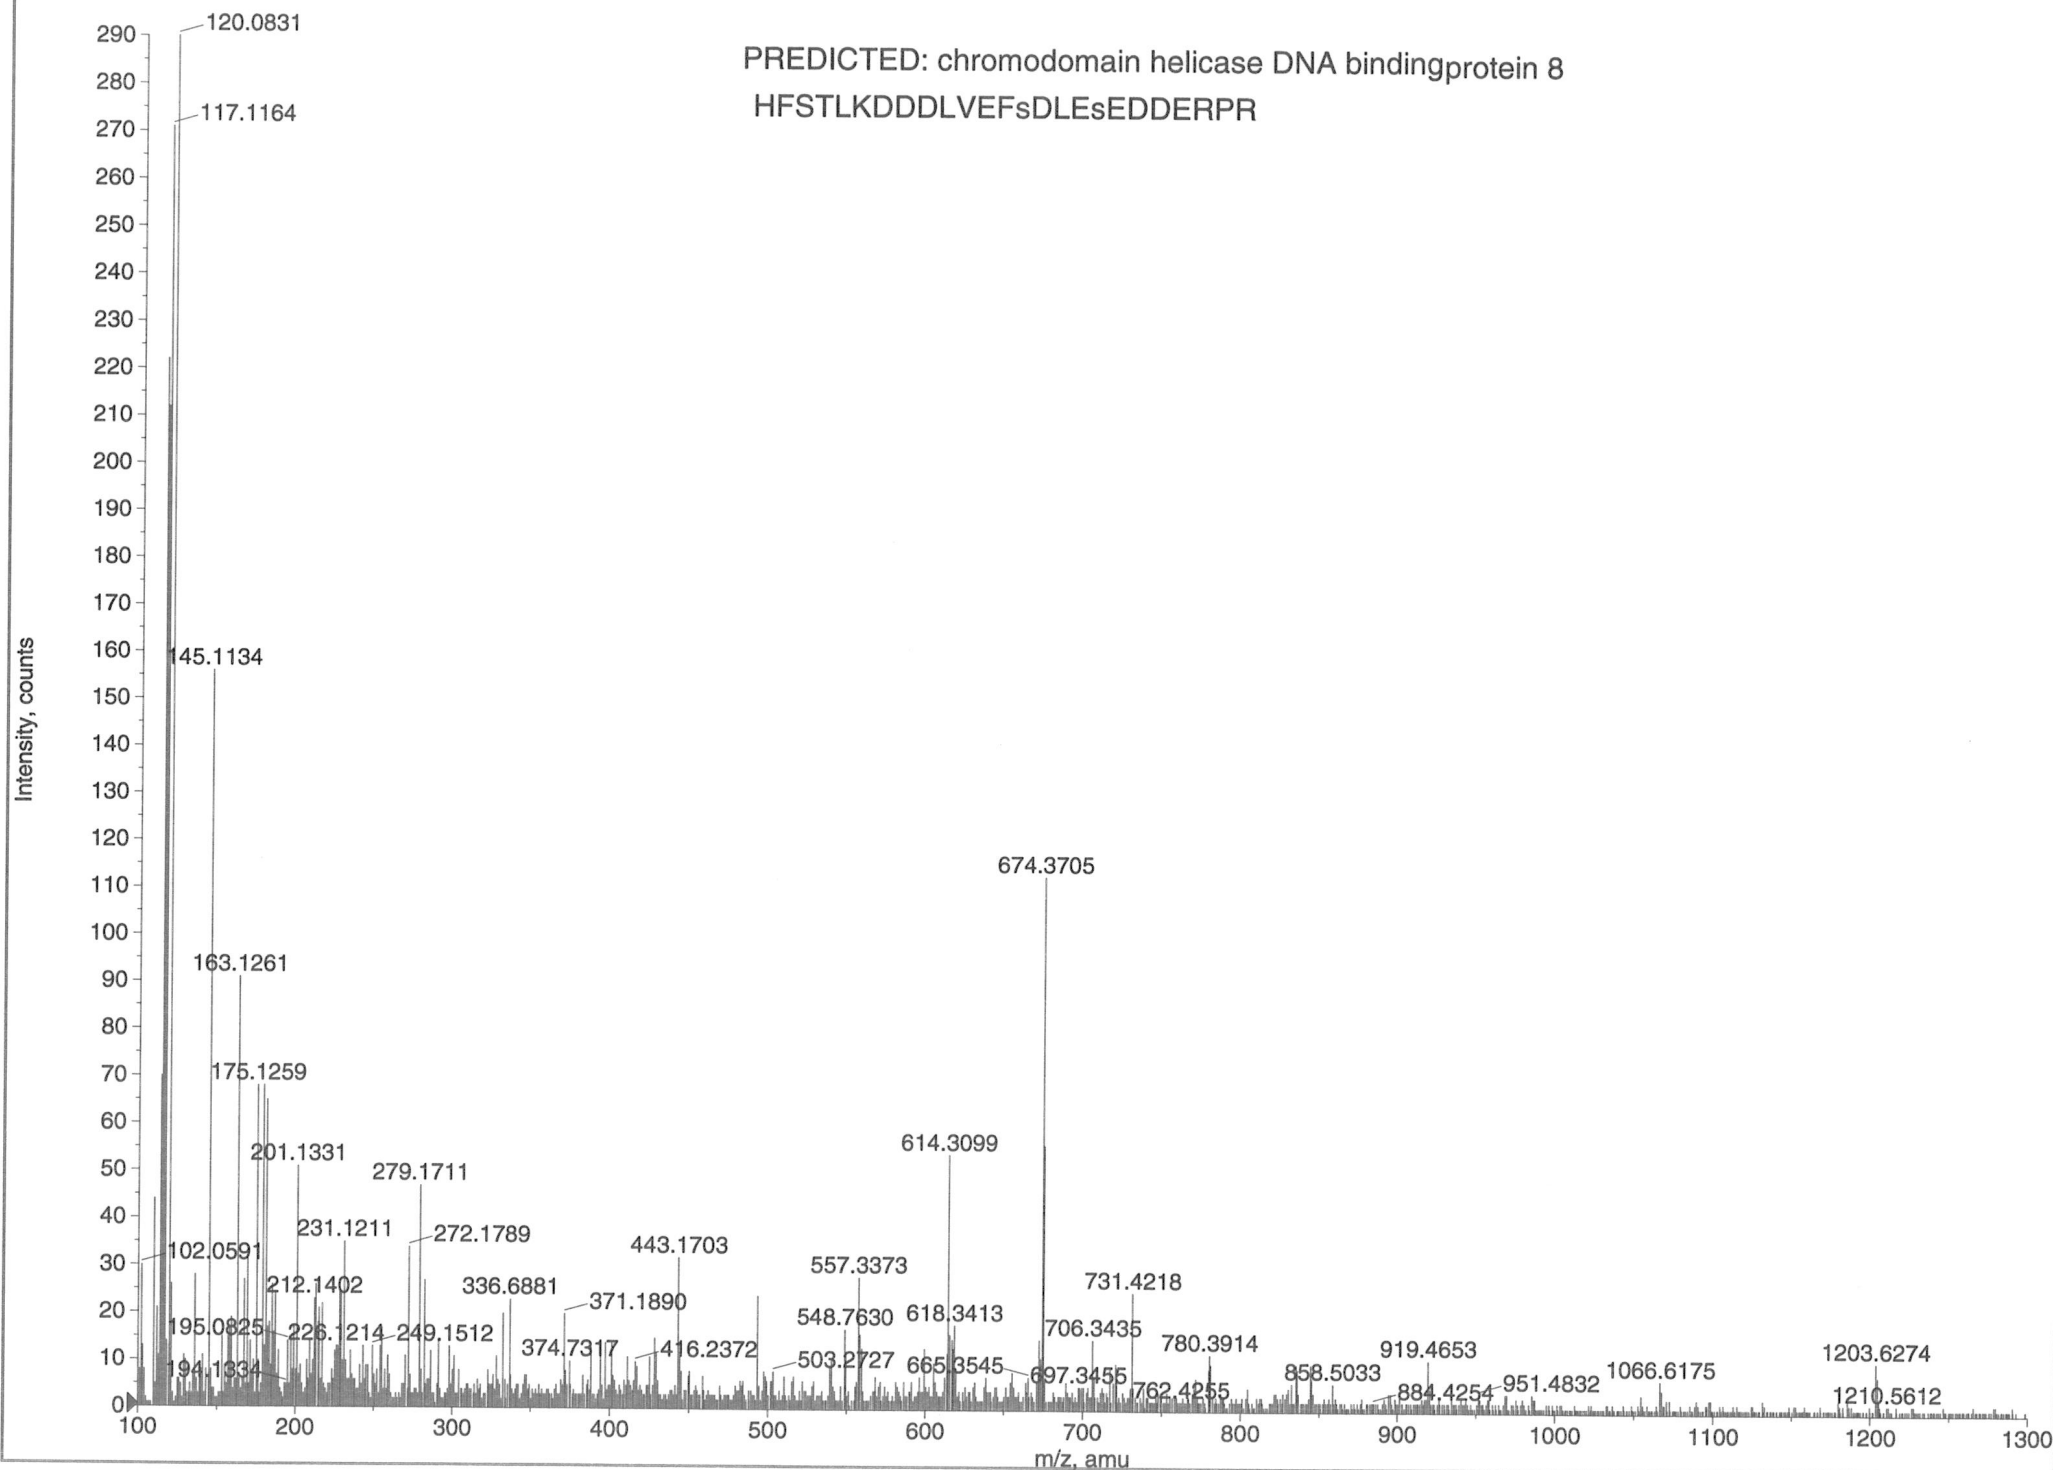

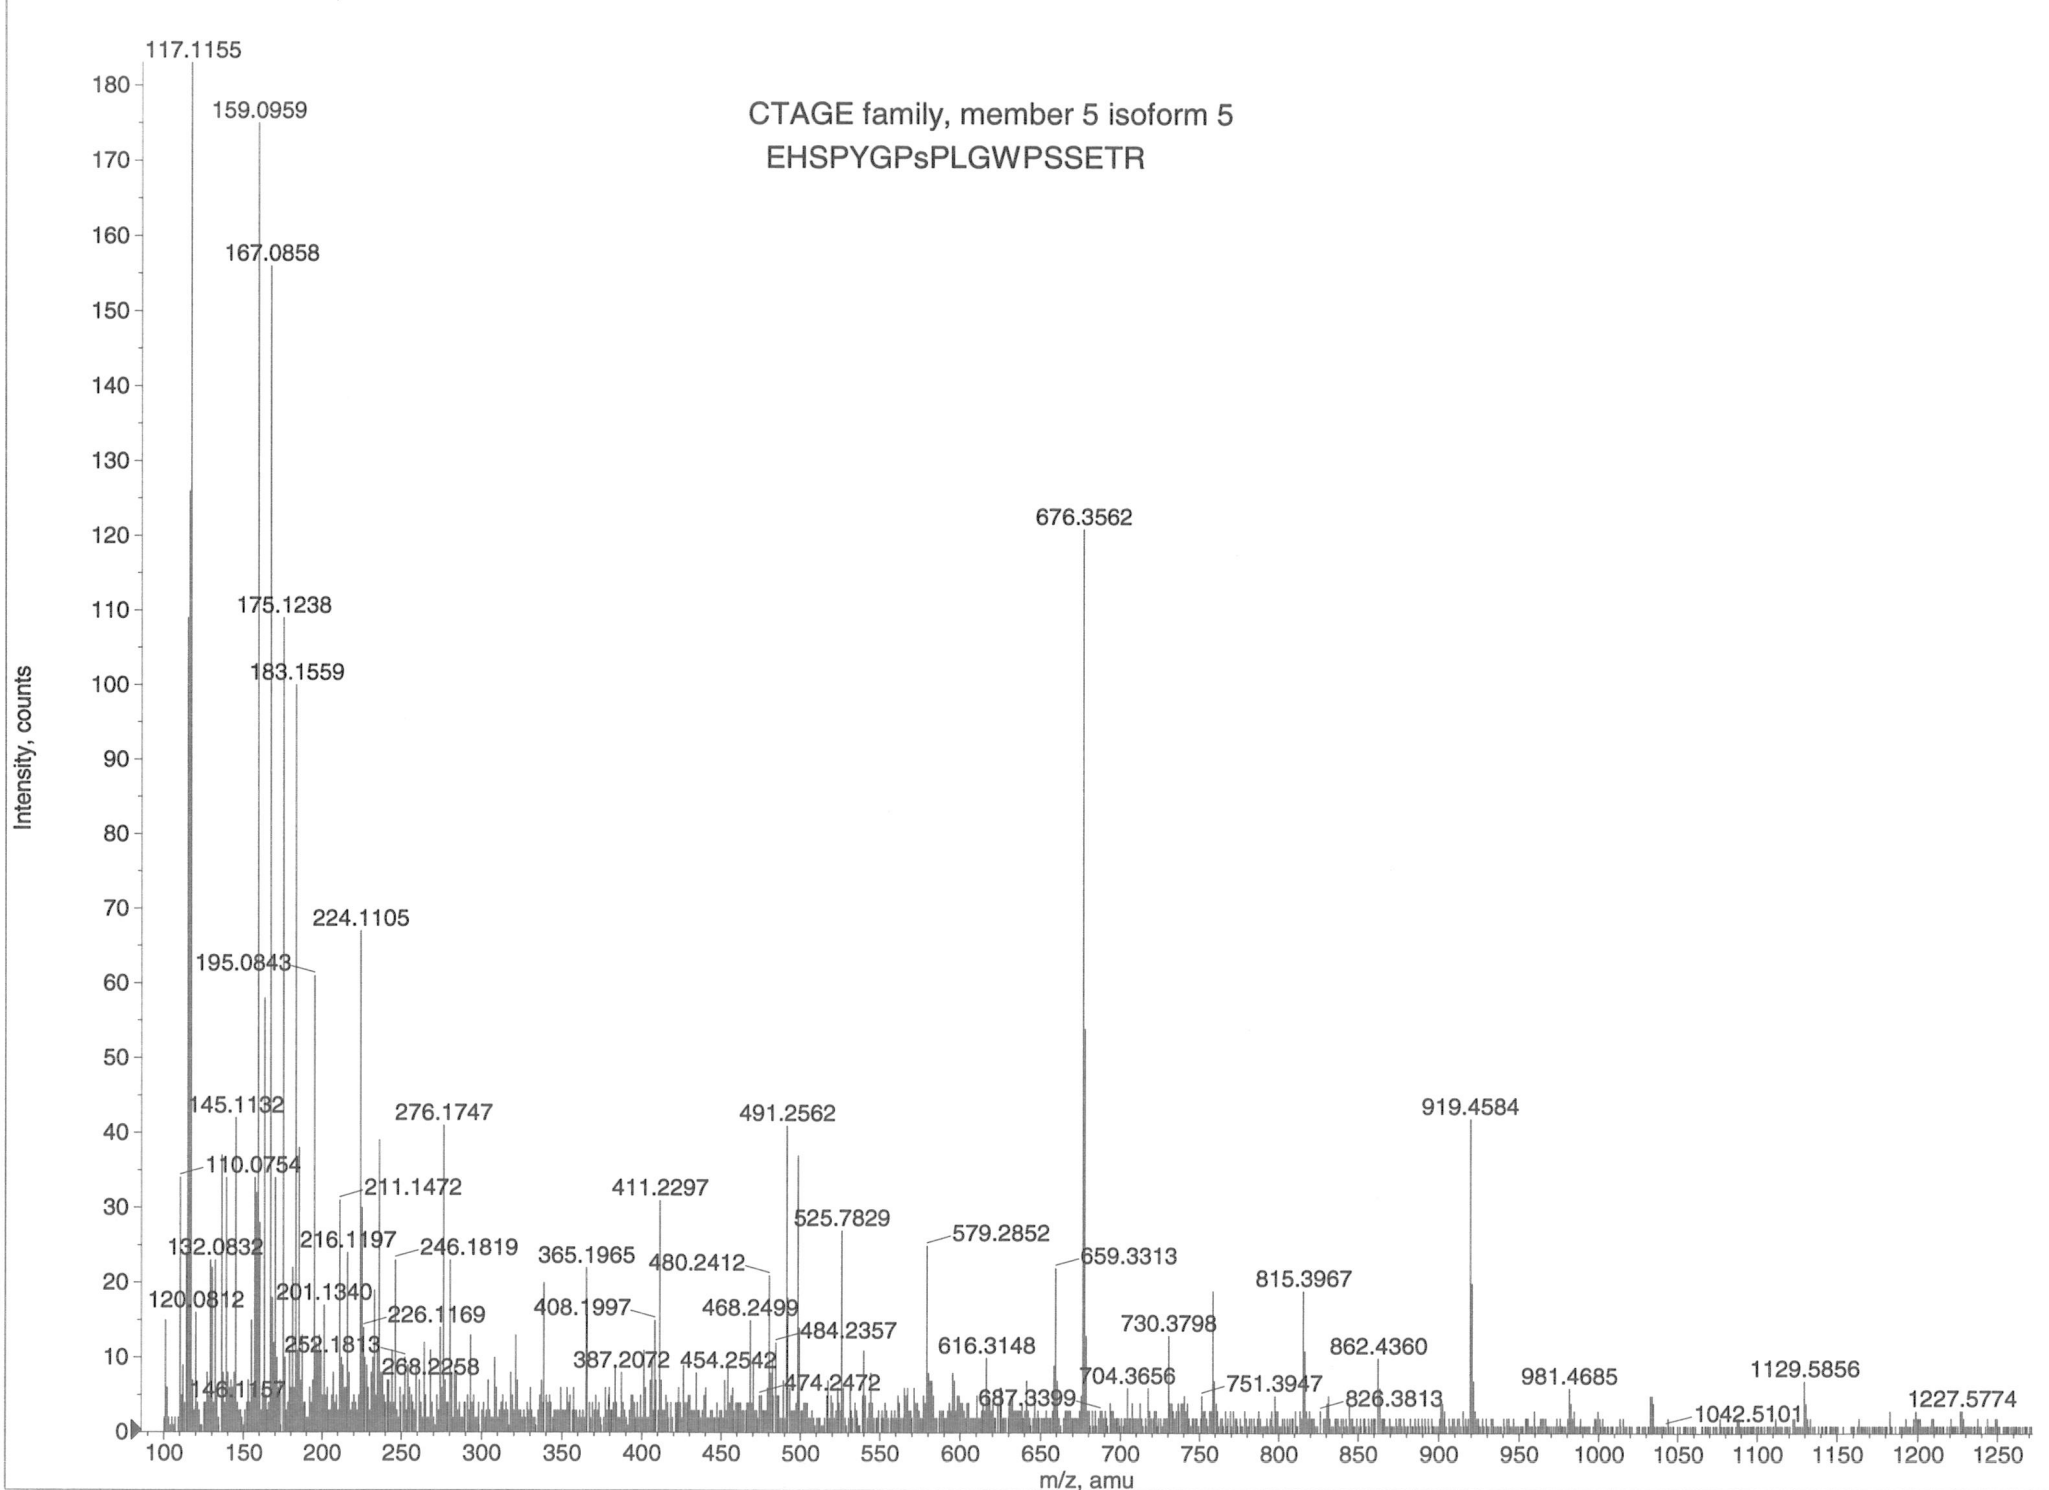

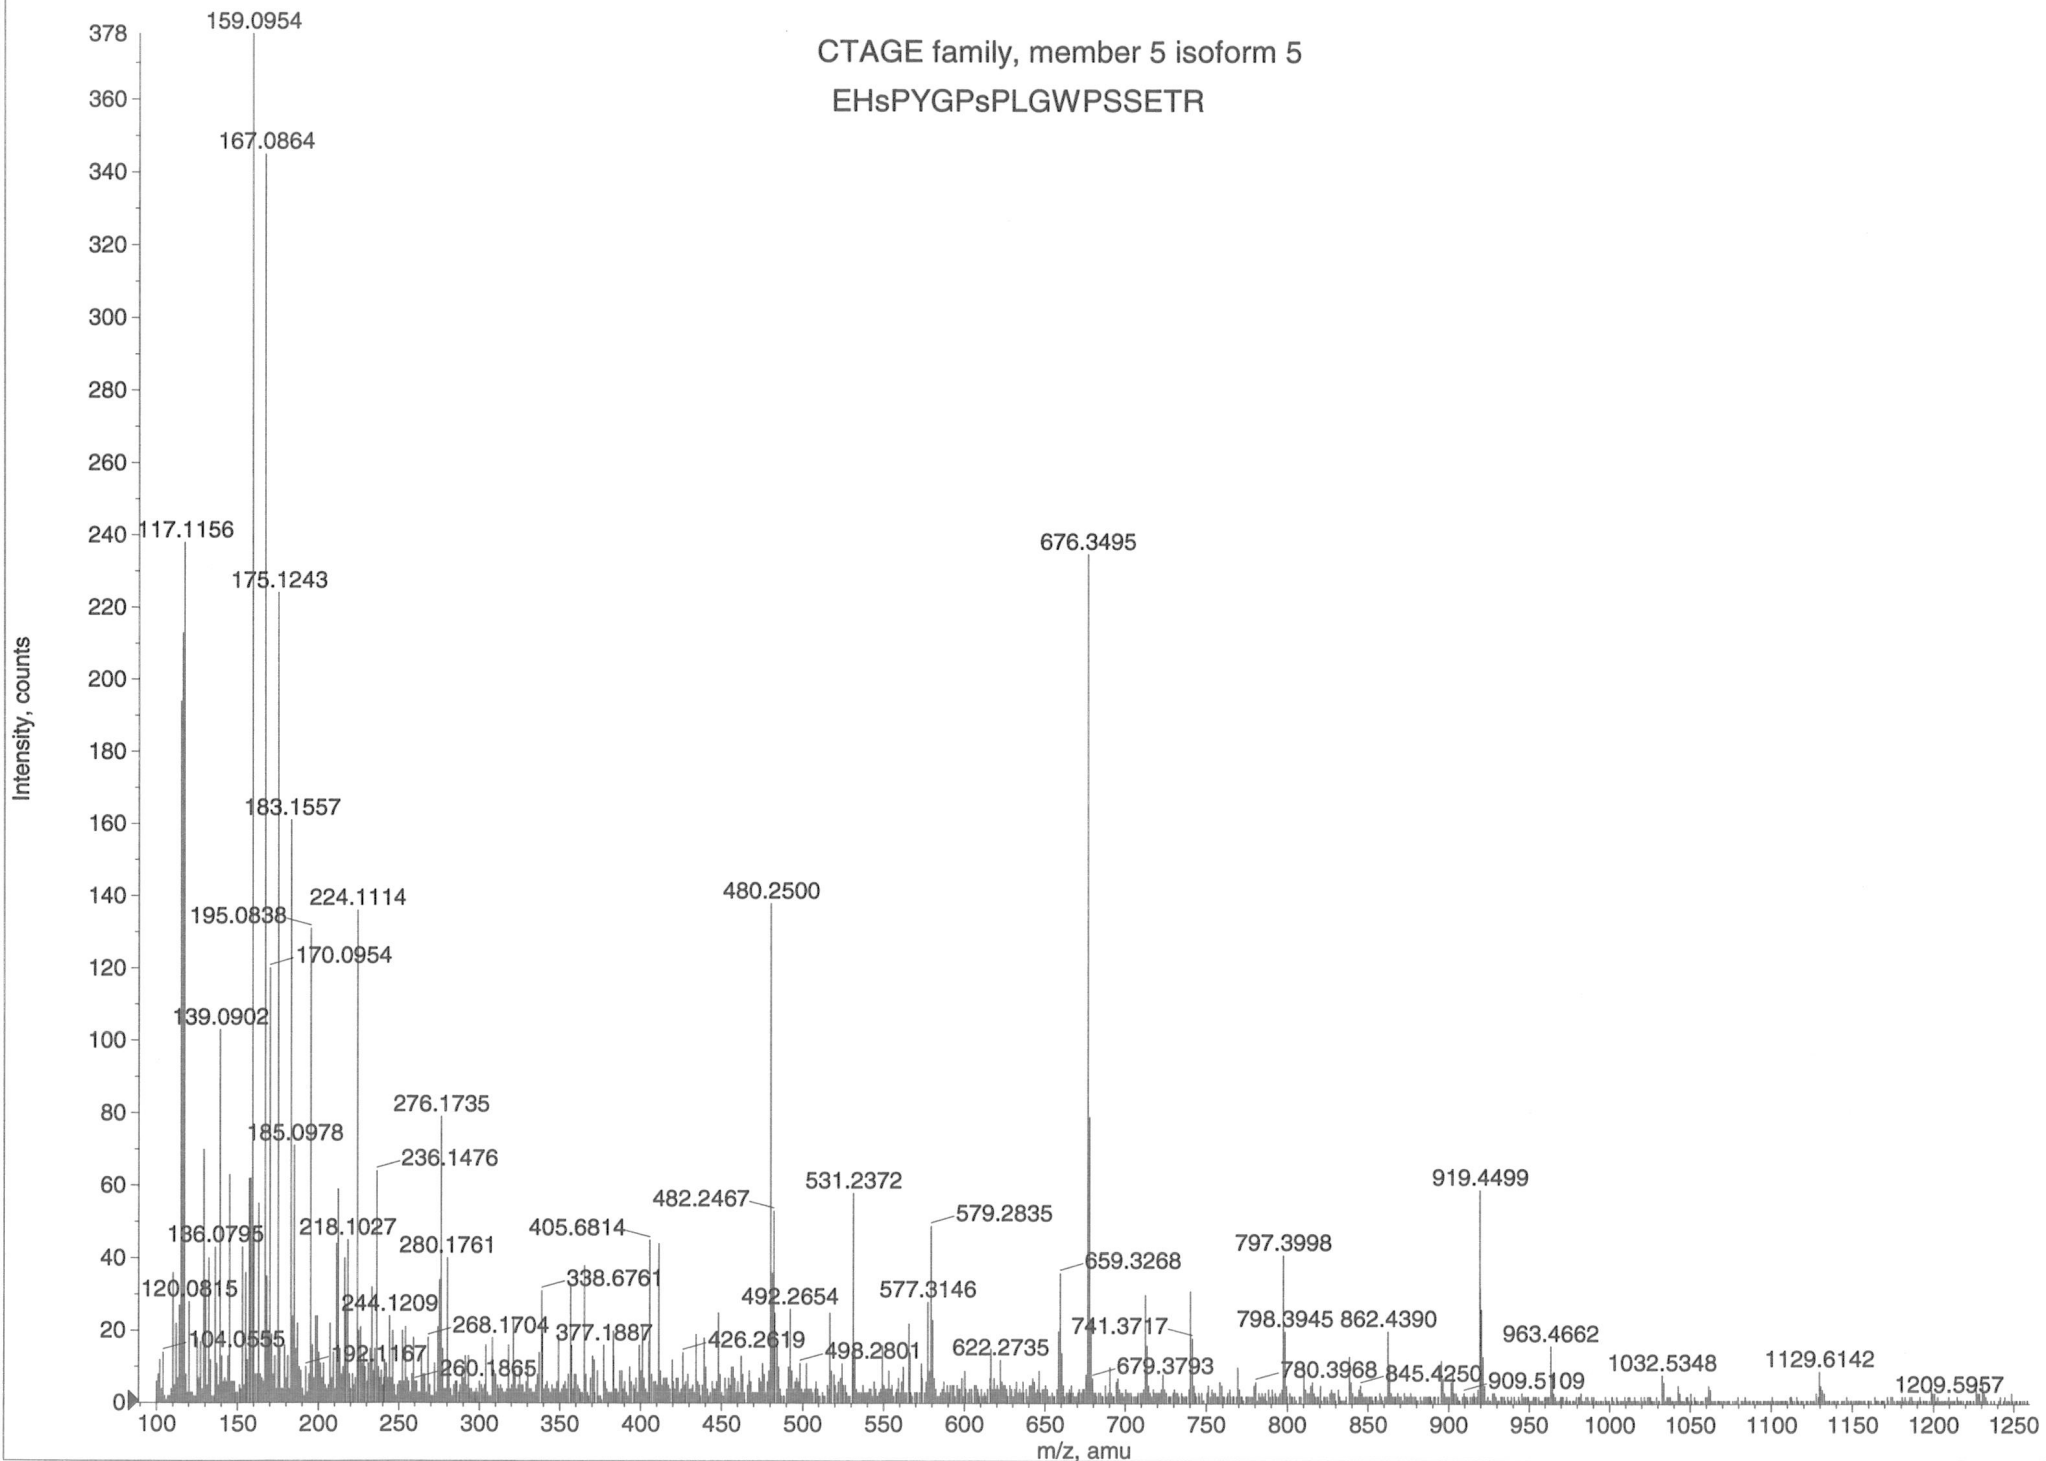

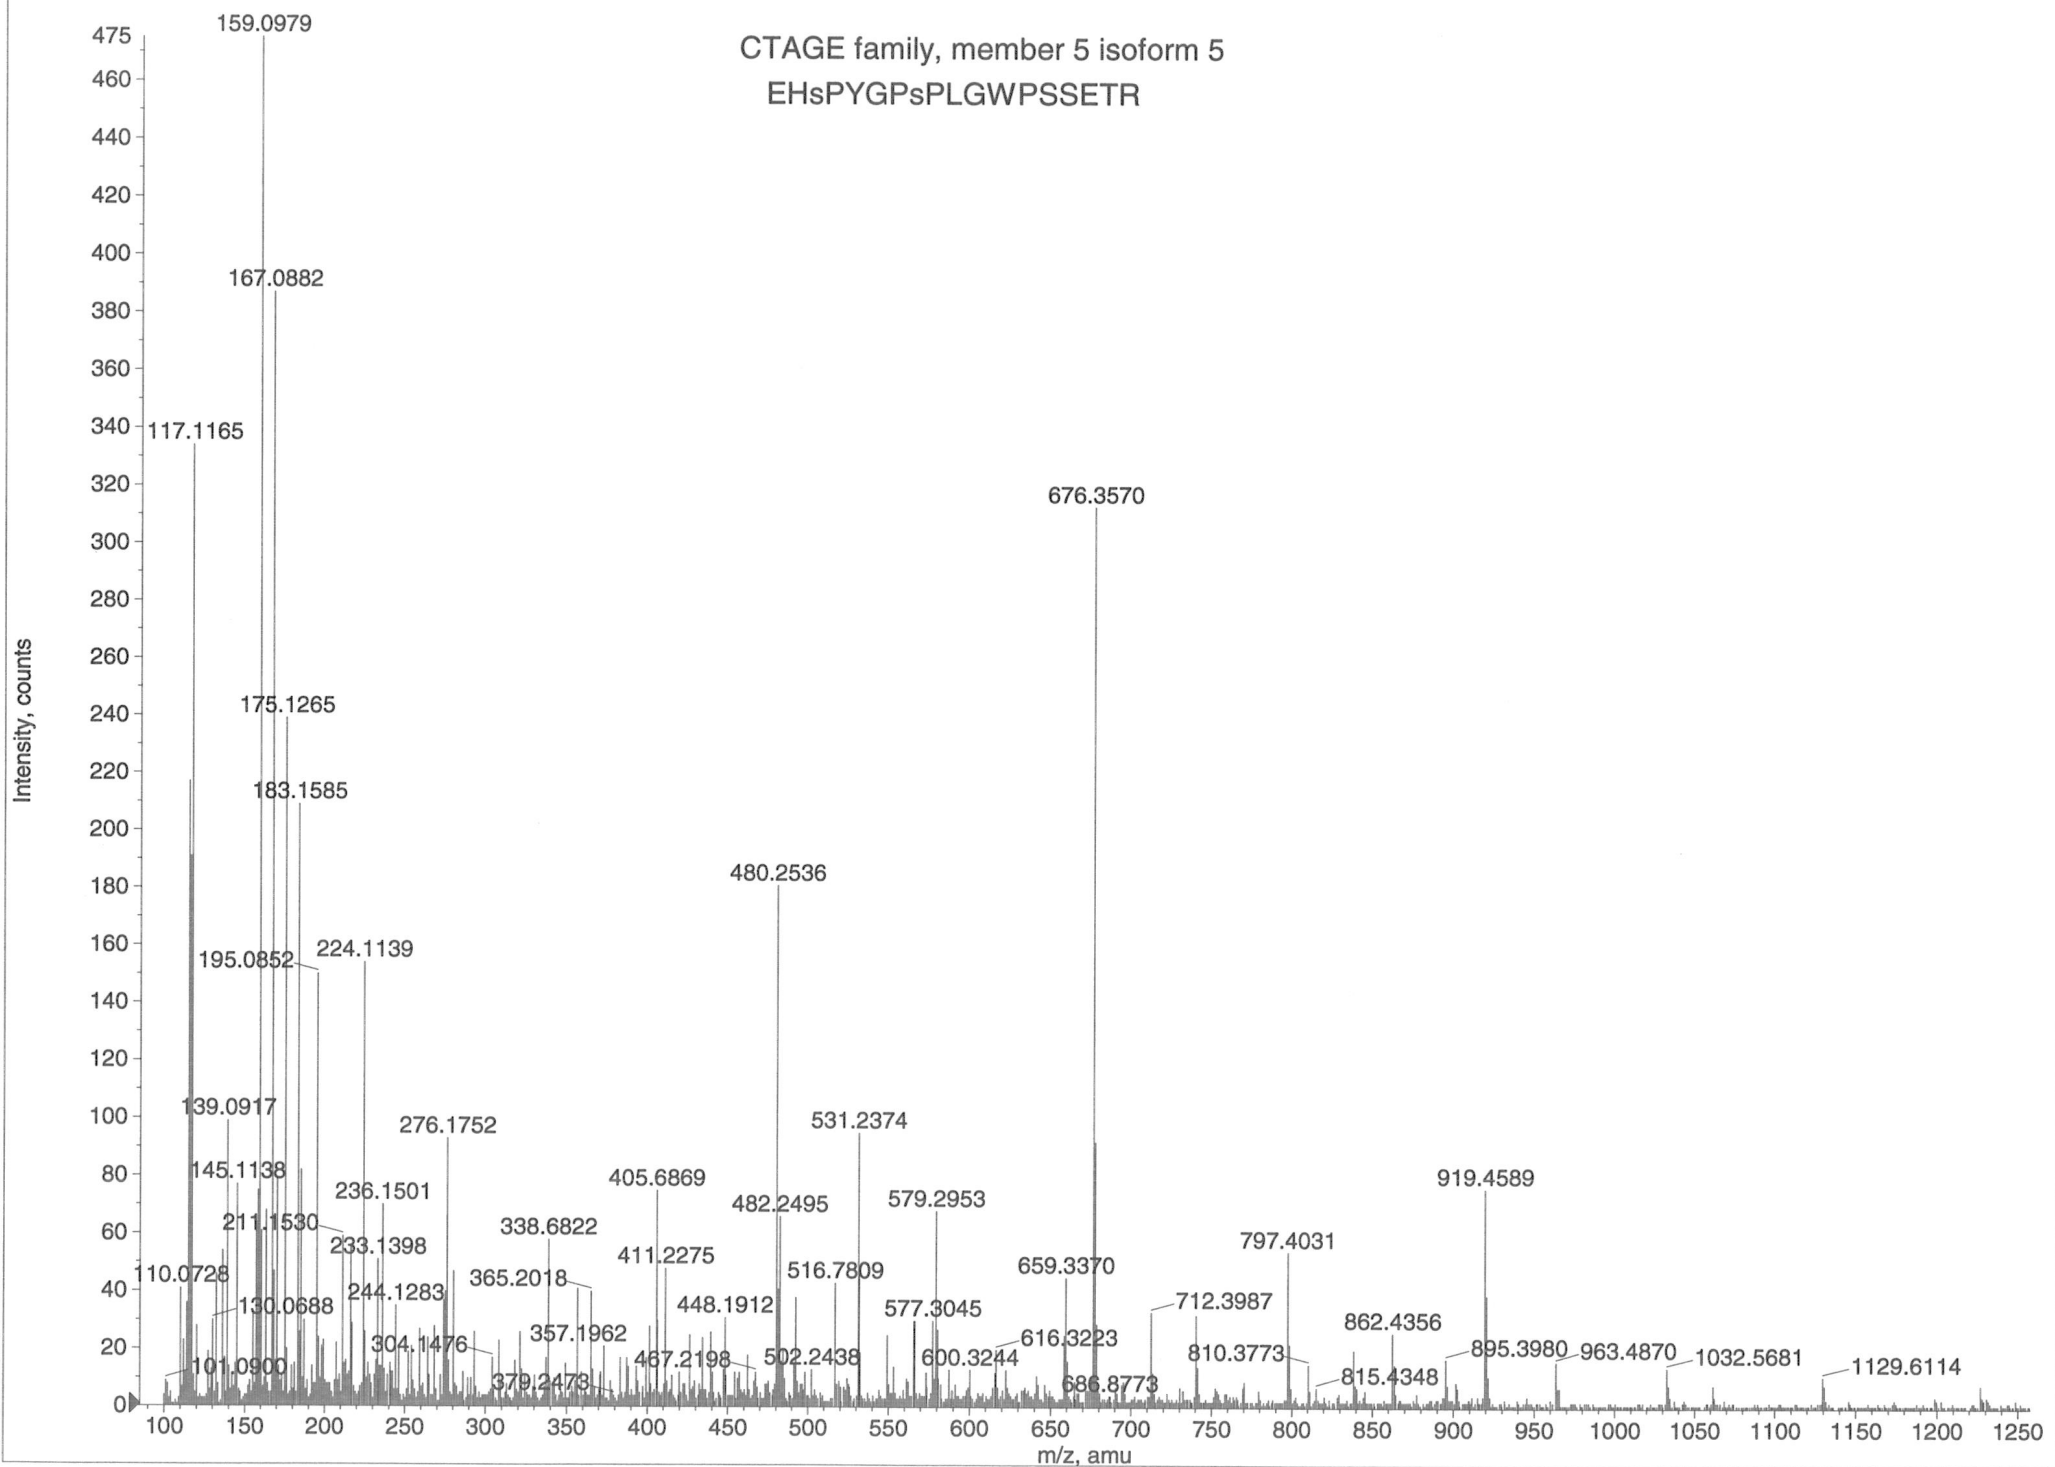

EH-domain containing 1  
DKPTYDEIFYTLSPVNGK

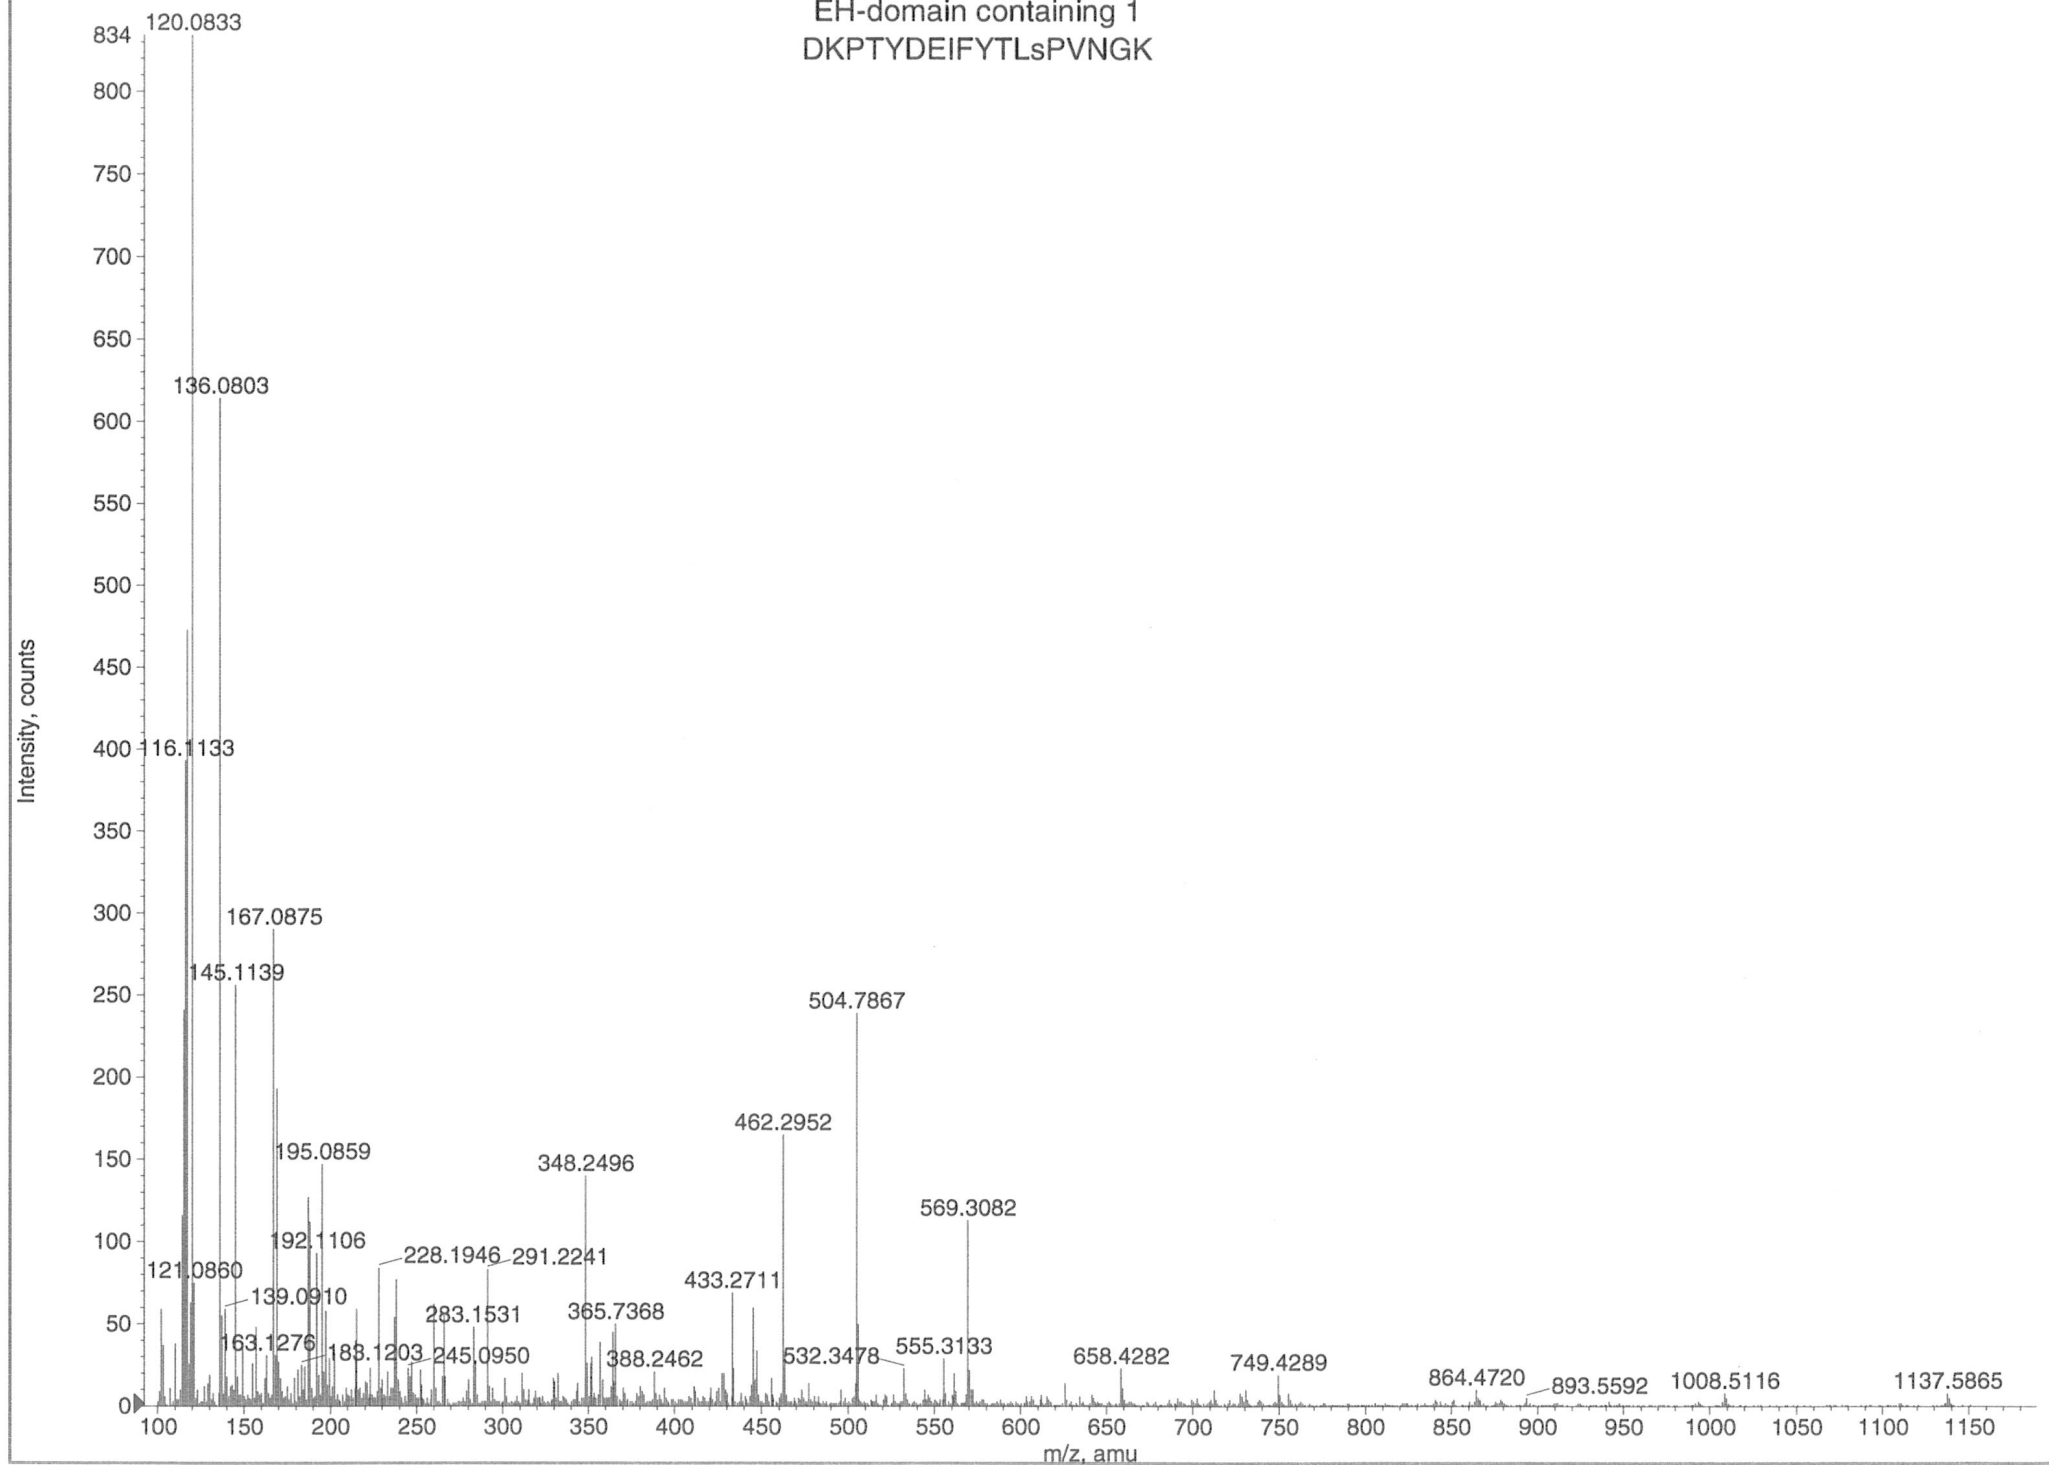

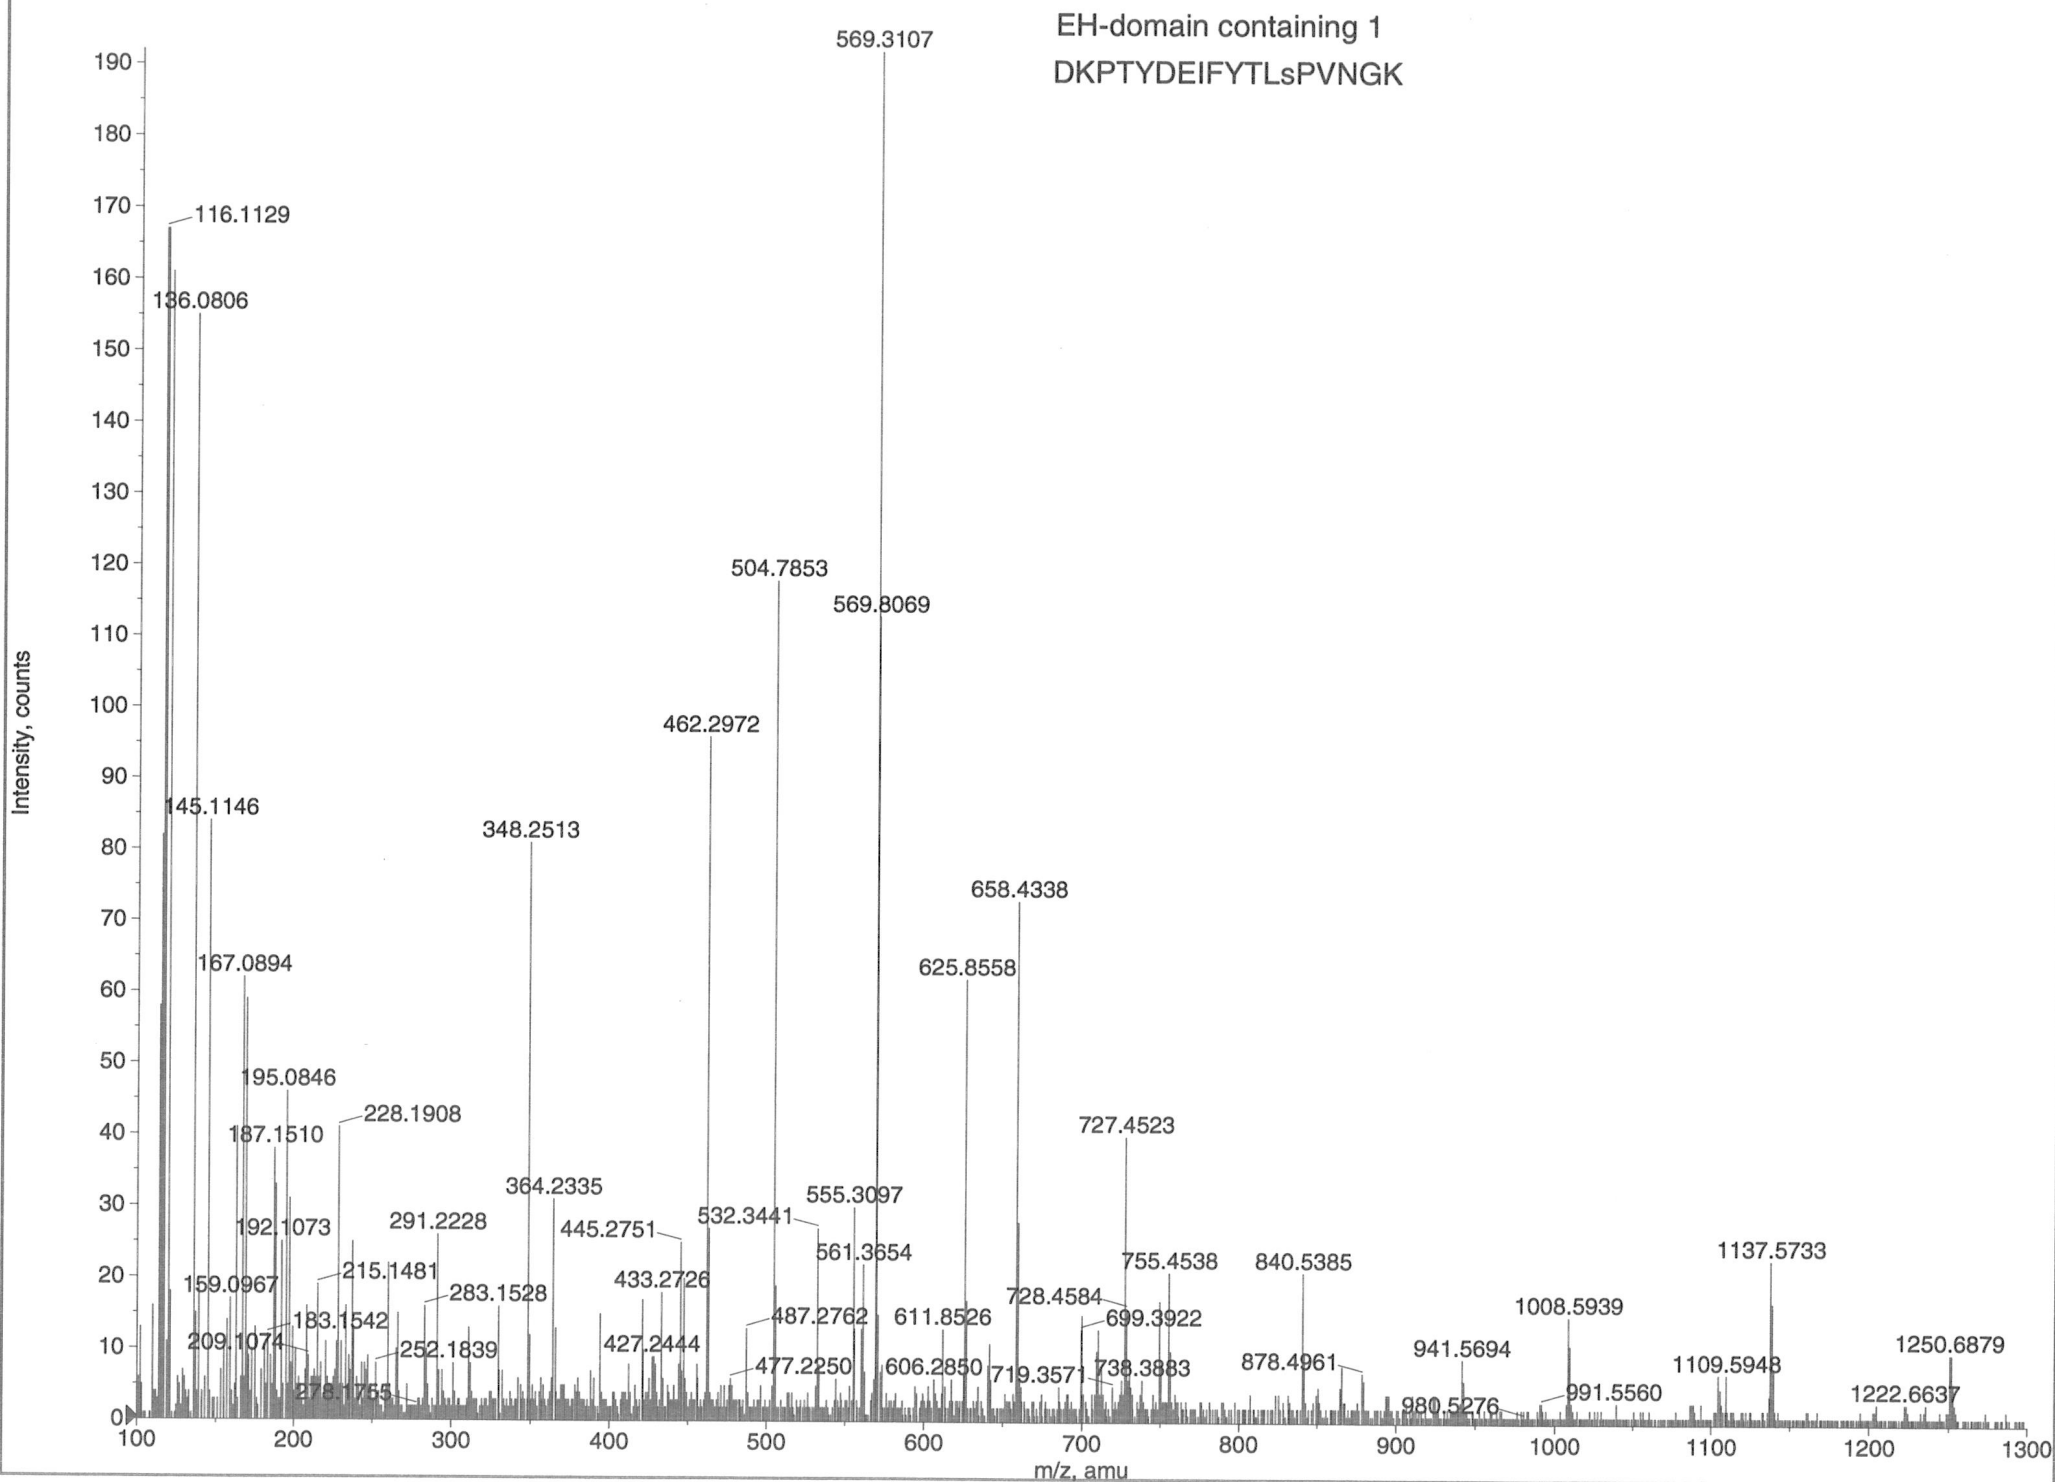

EH-domain containing 4  
DKPVYDELFYTLsPINGK

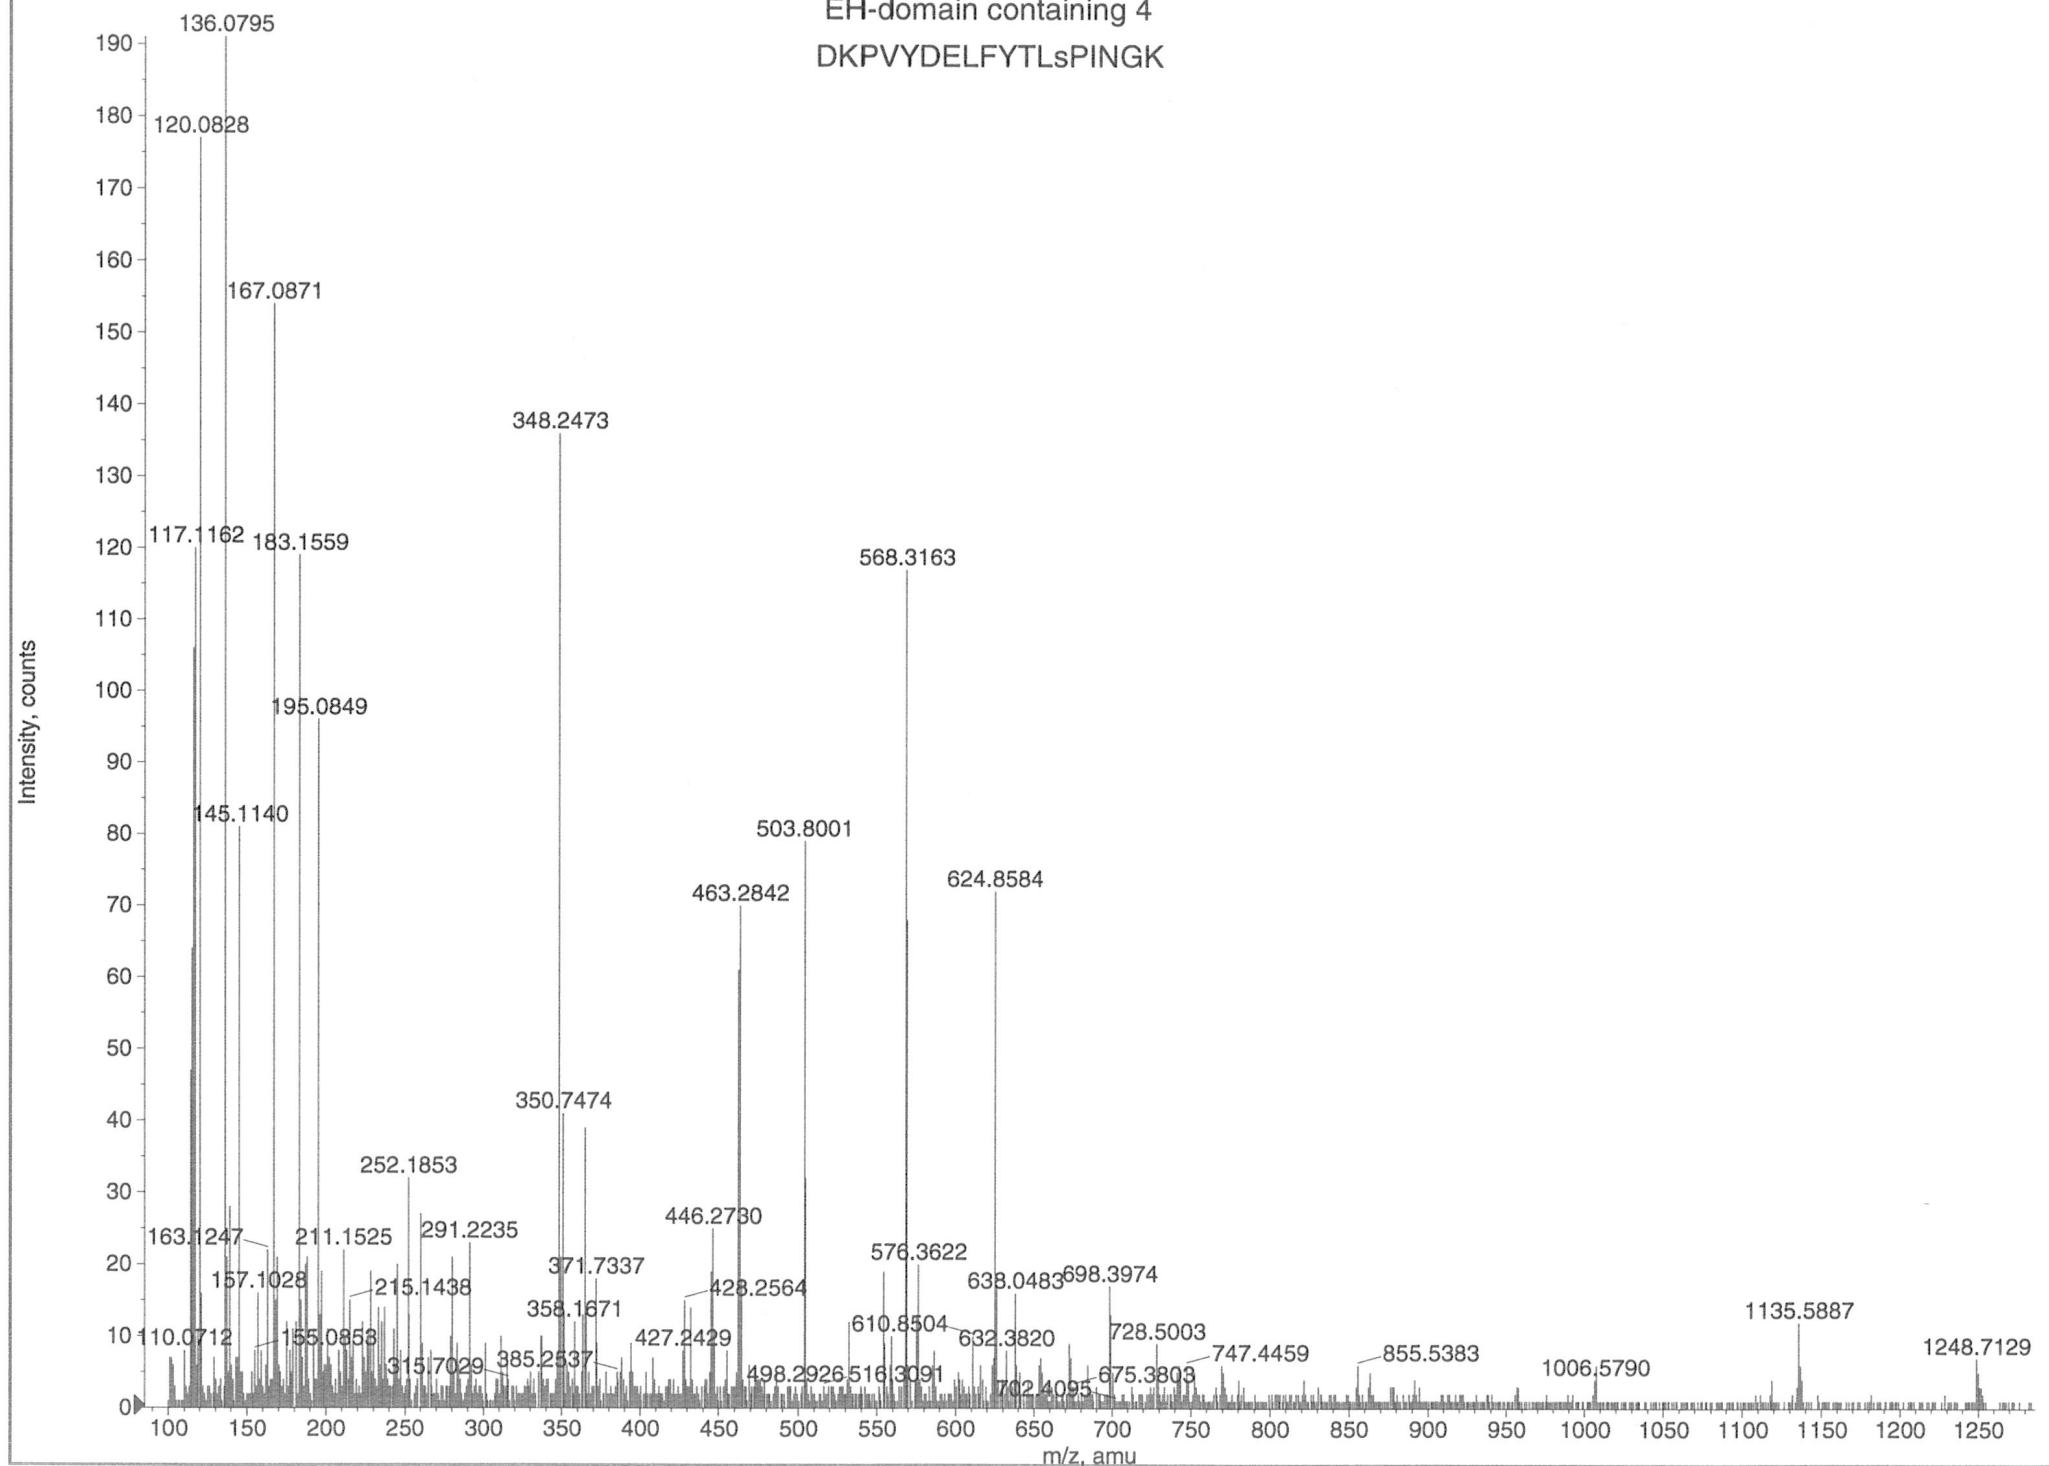

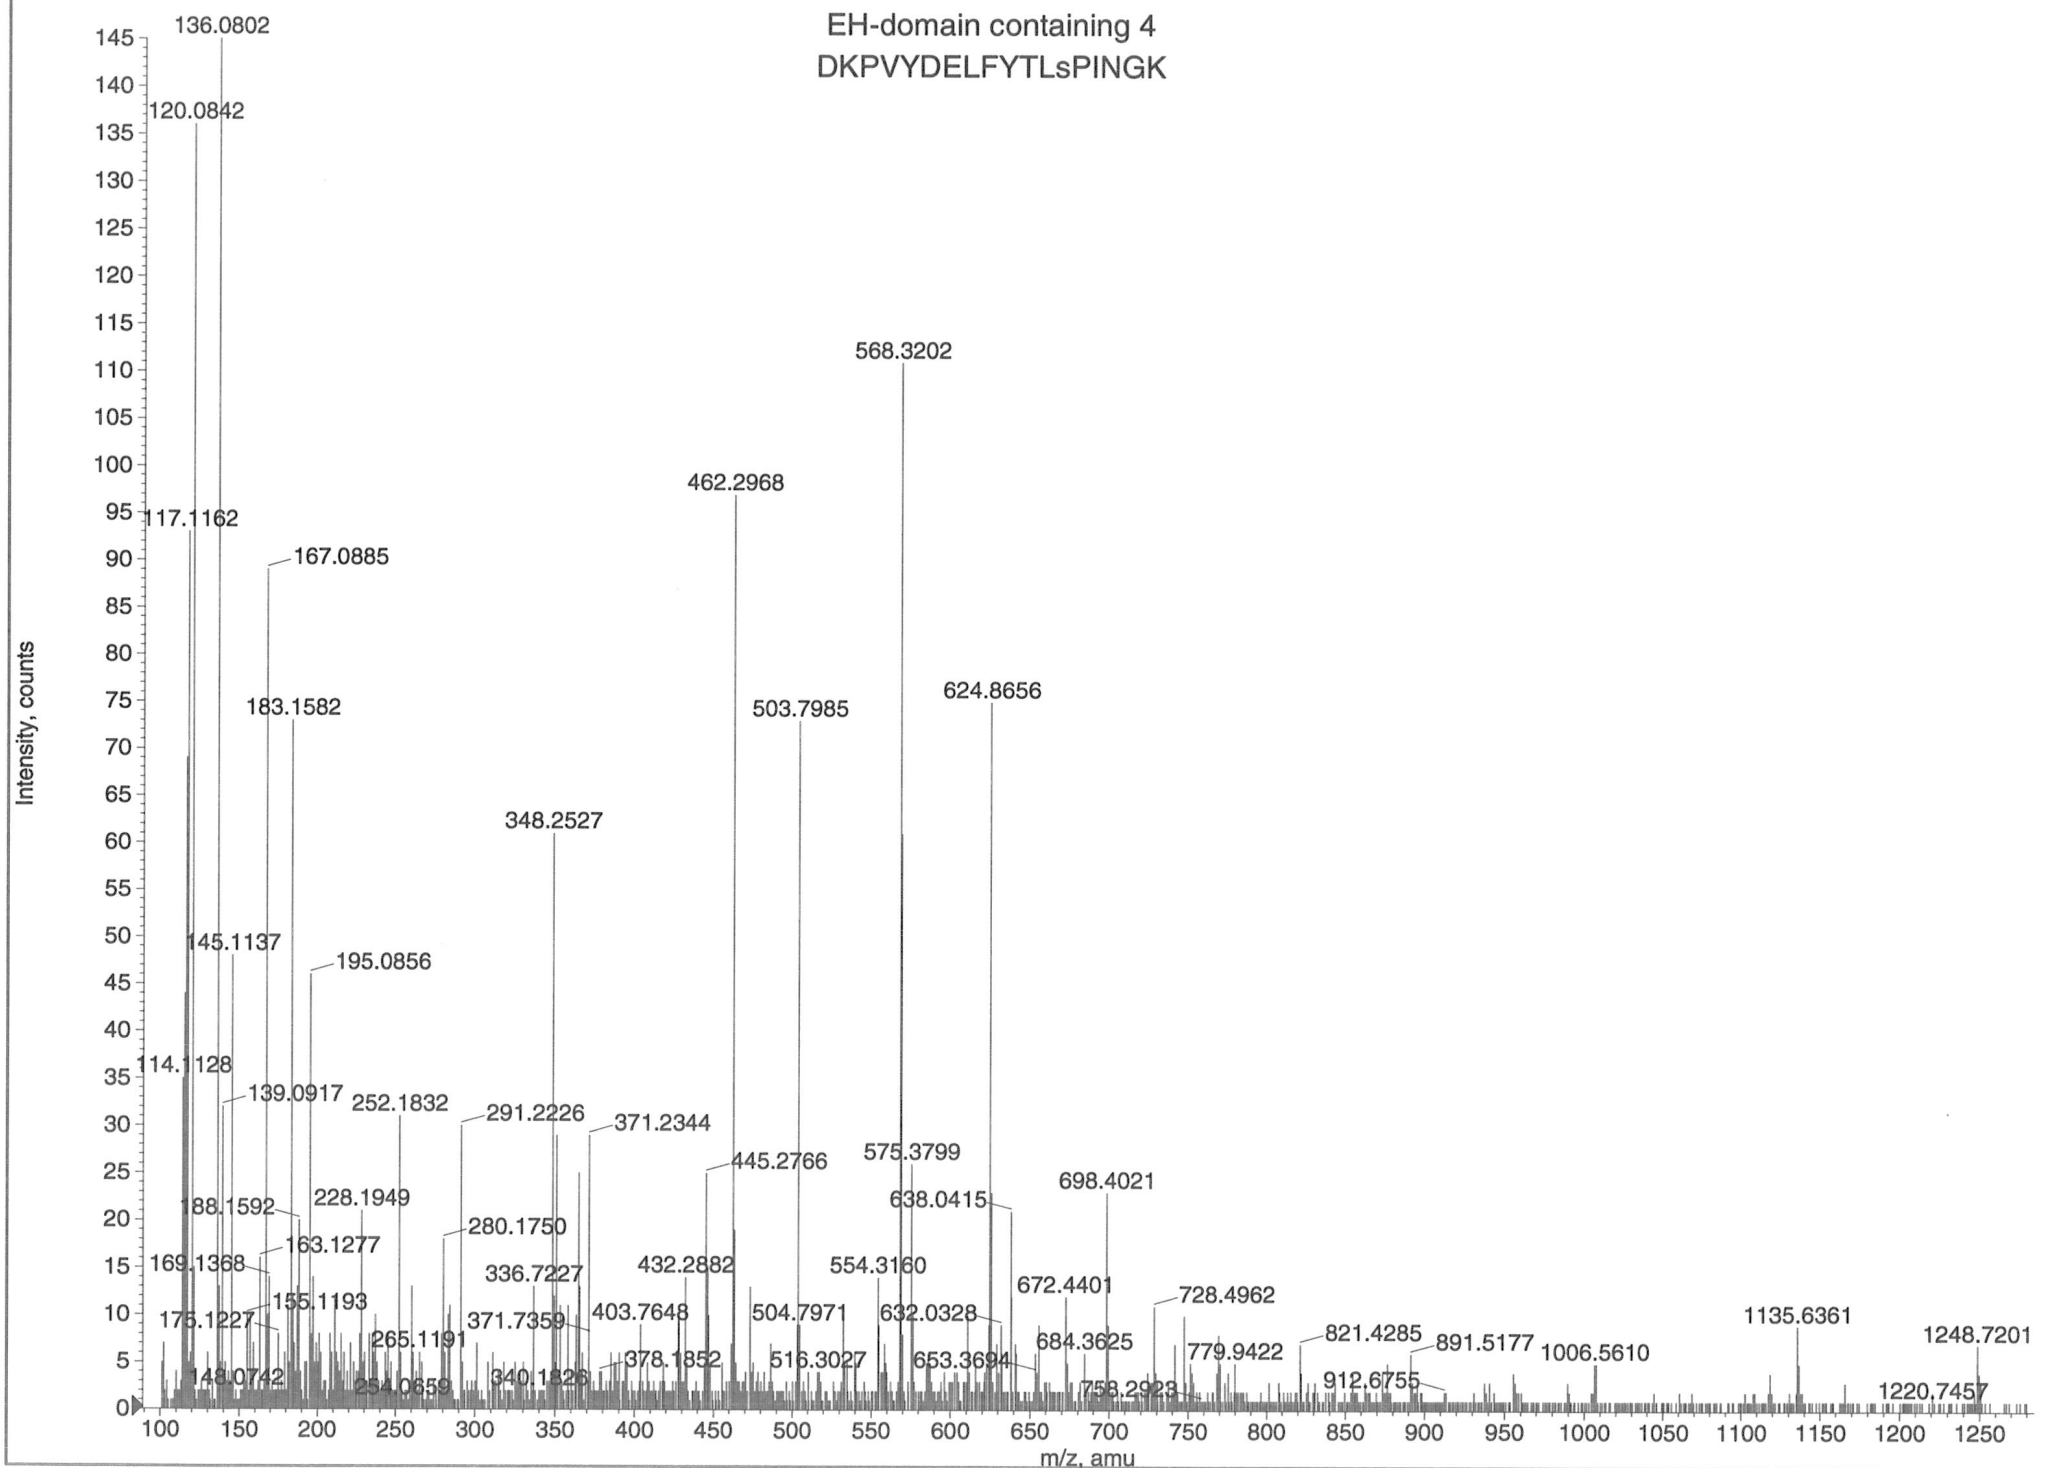



Eukaryotic translation initiation factor 3, subunit 8, 110kDa  
QPLLLsEDEEDTKR

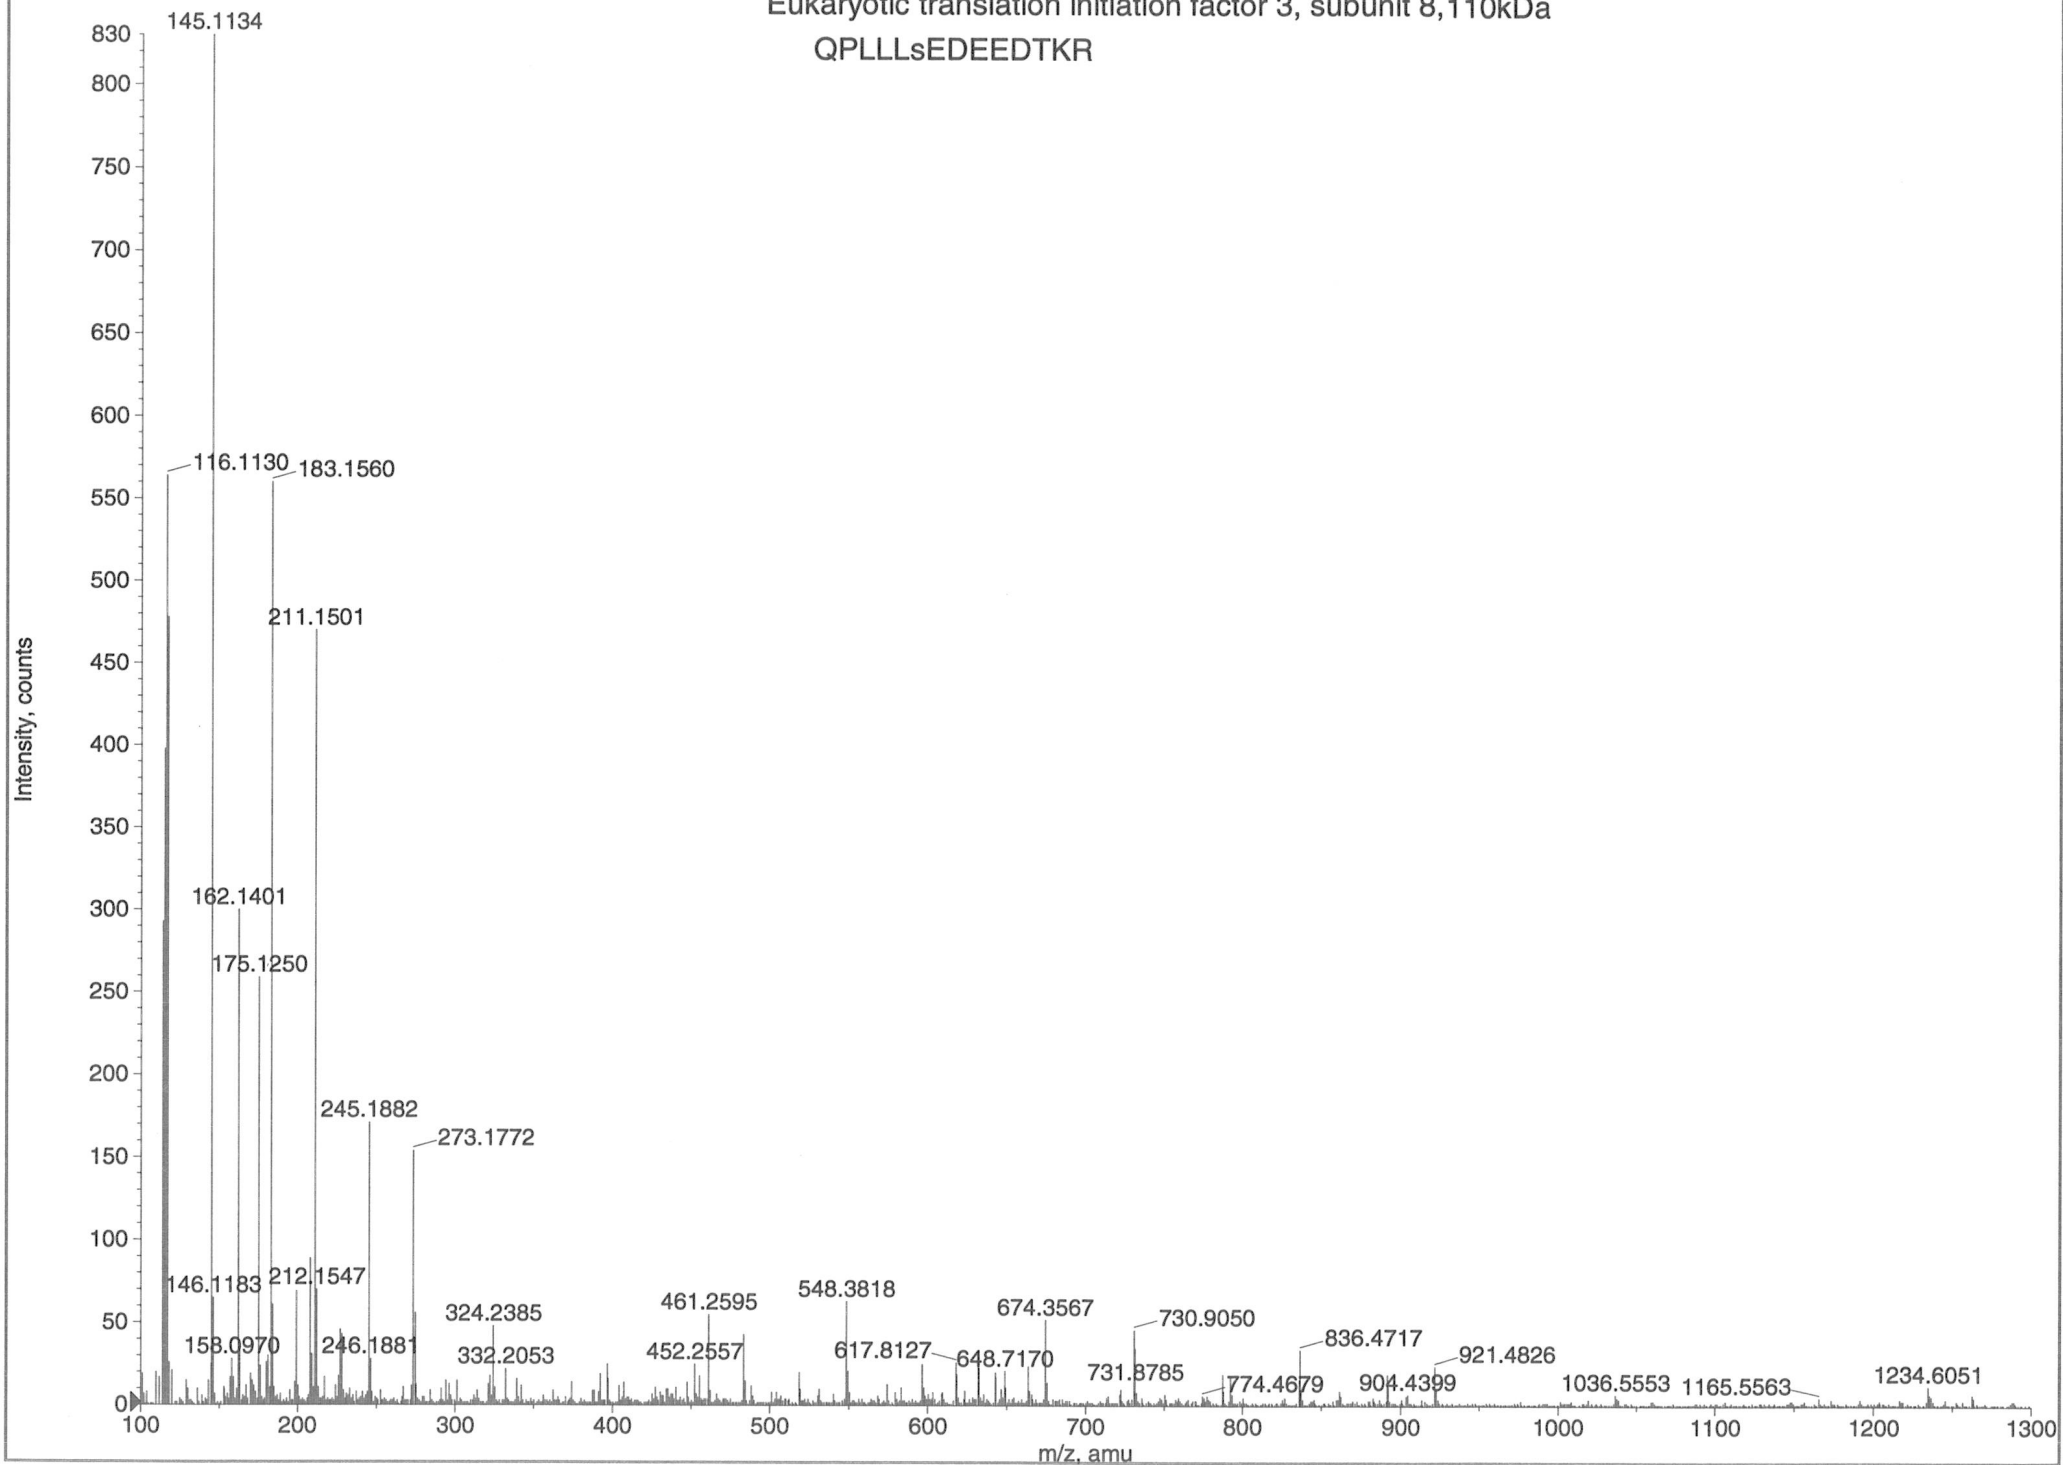

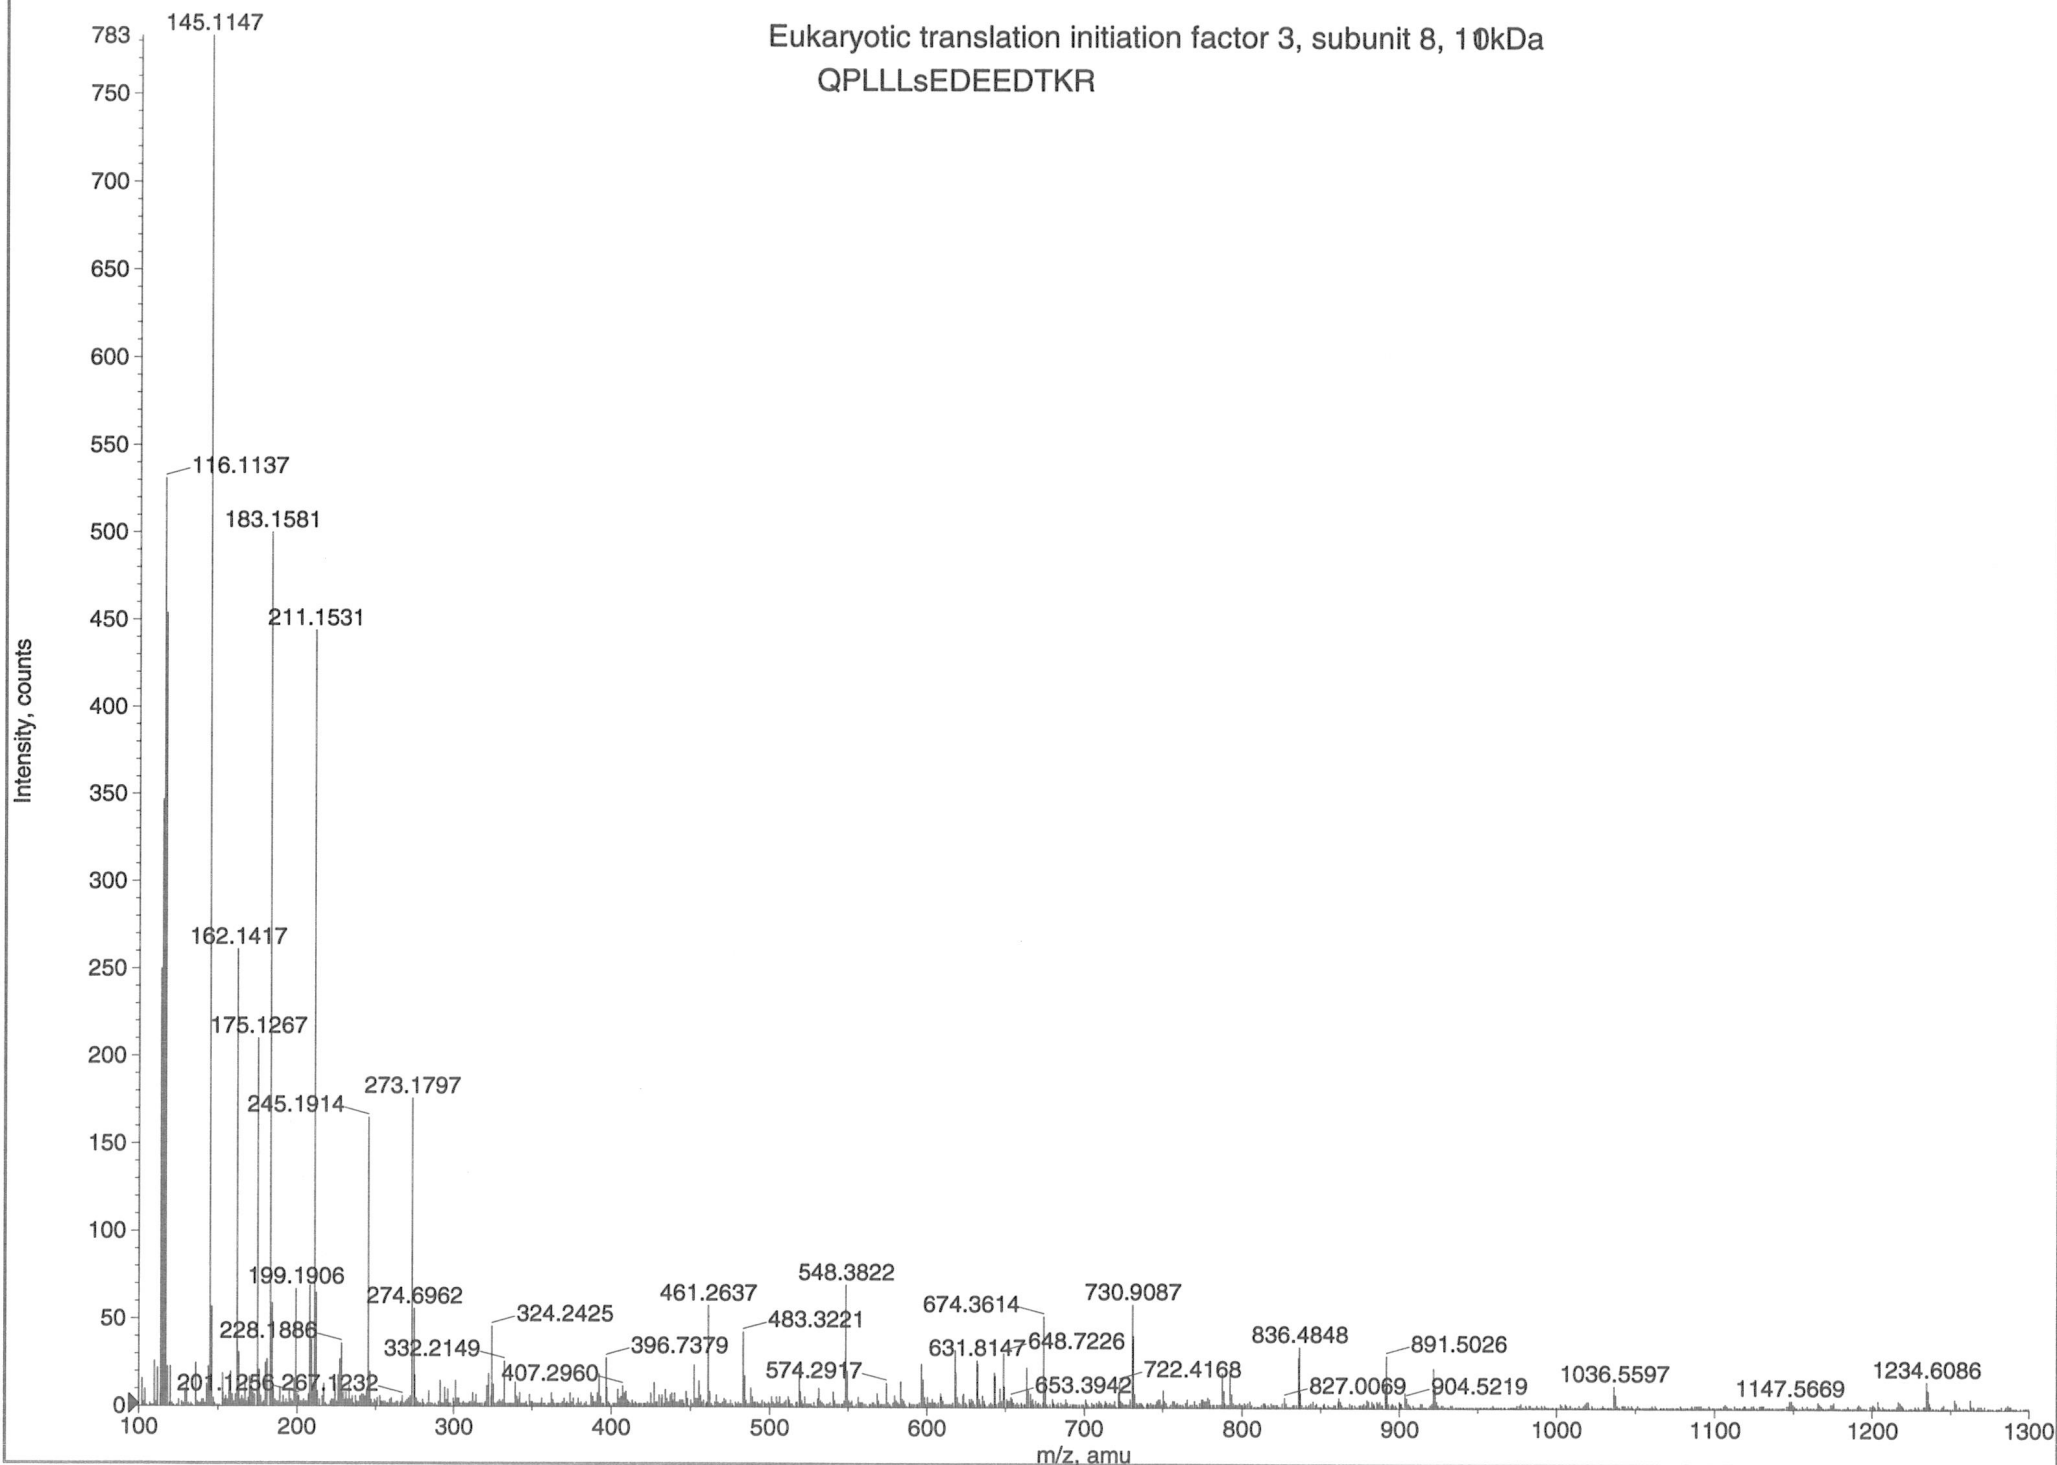

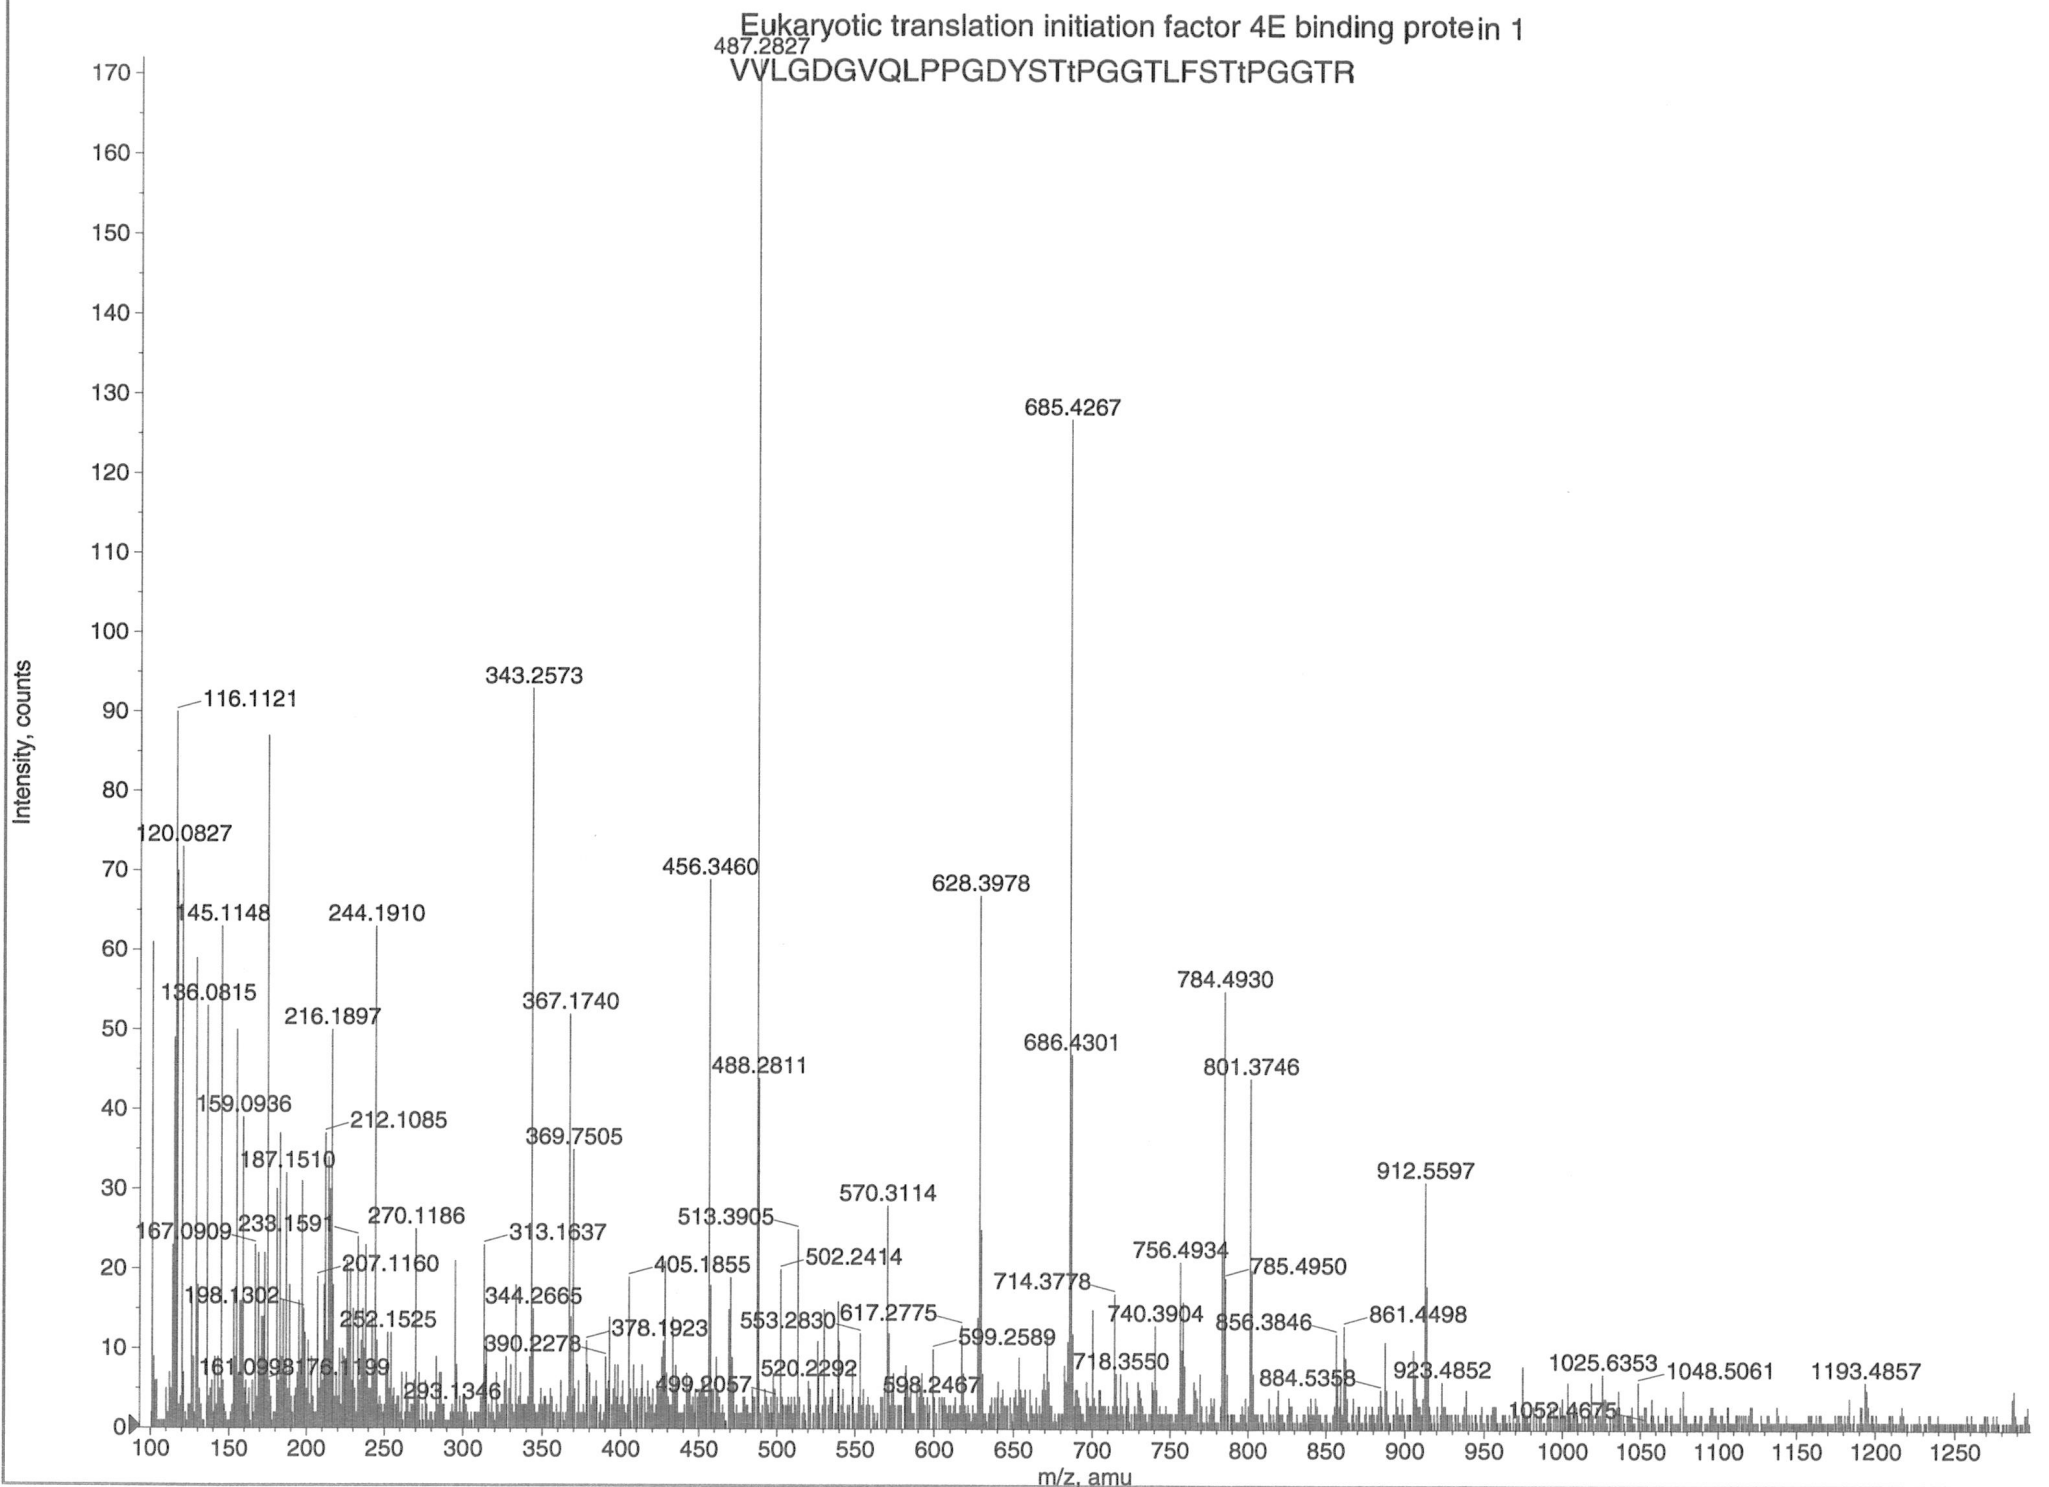

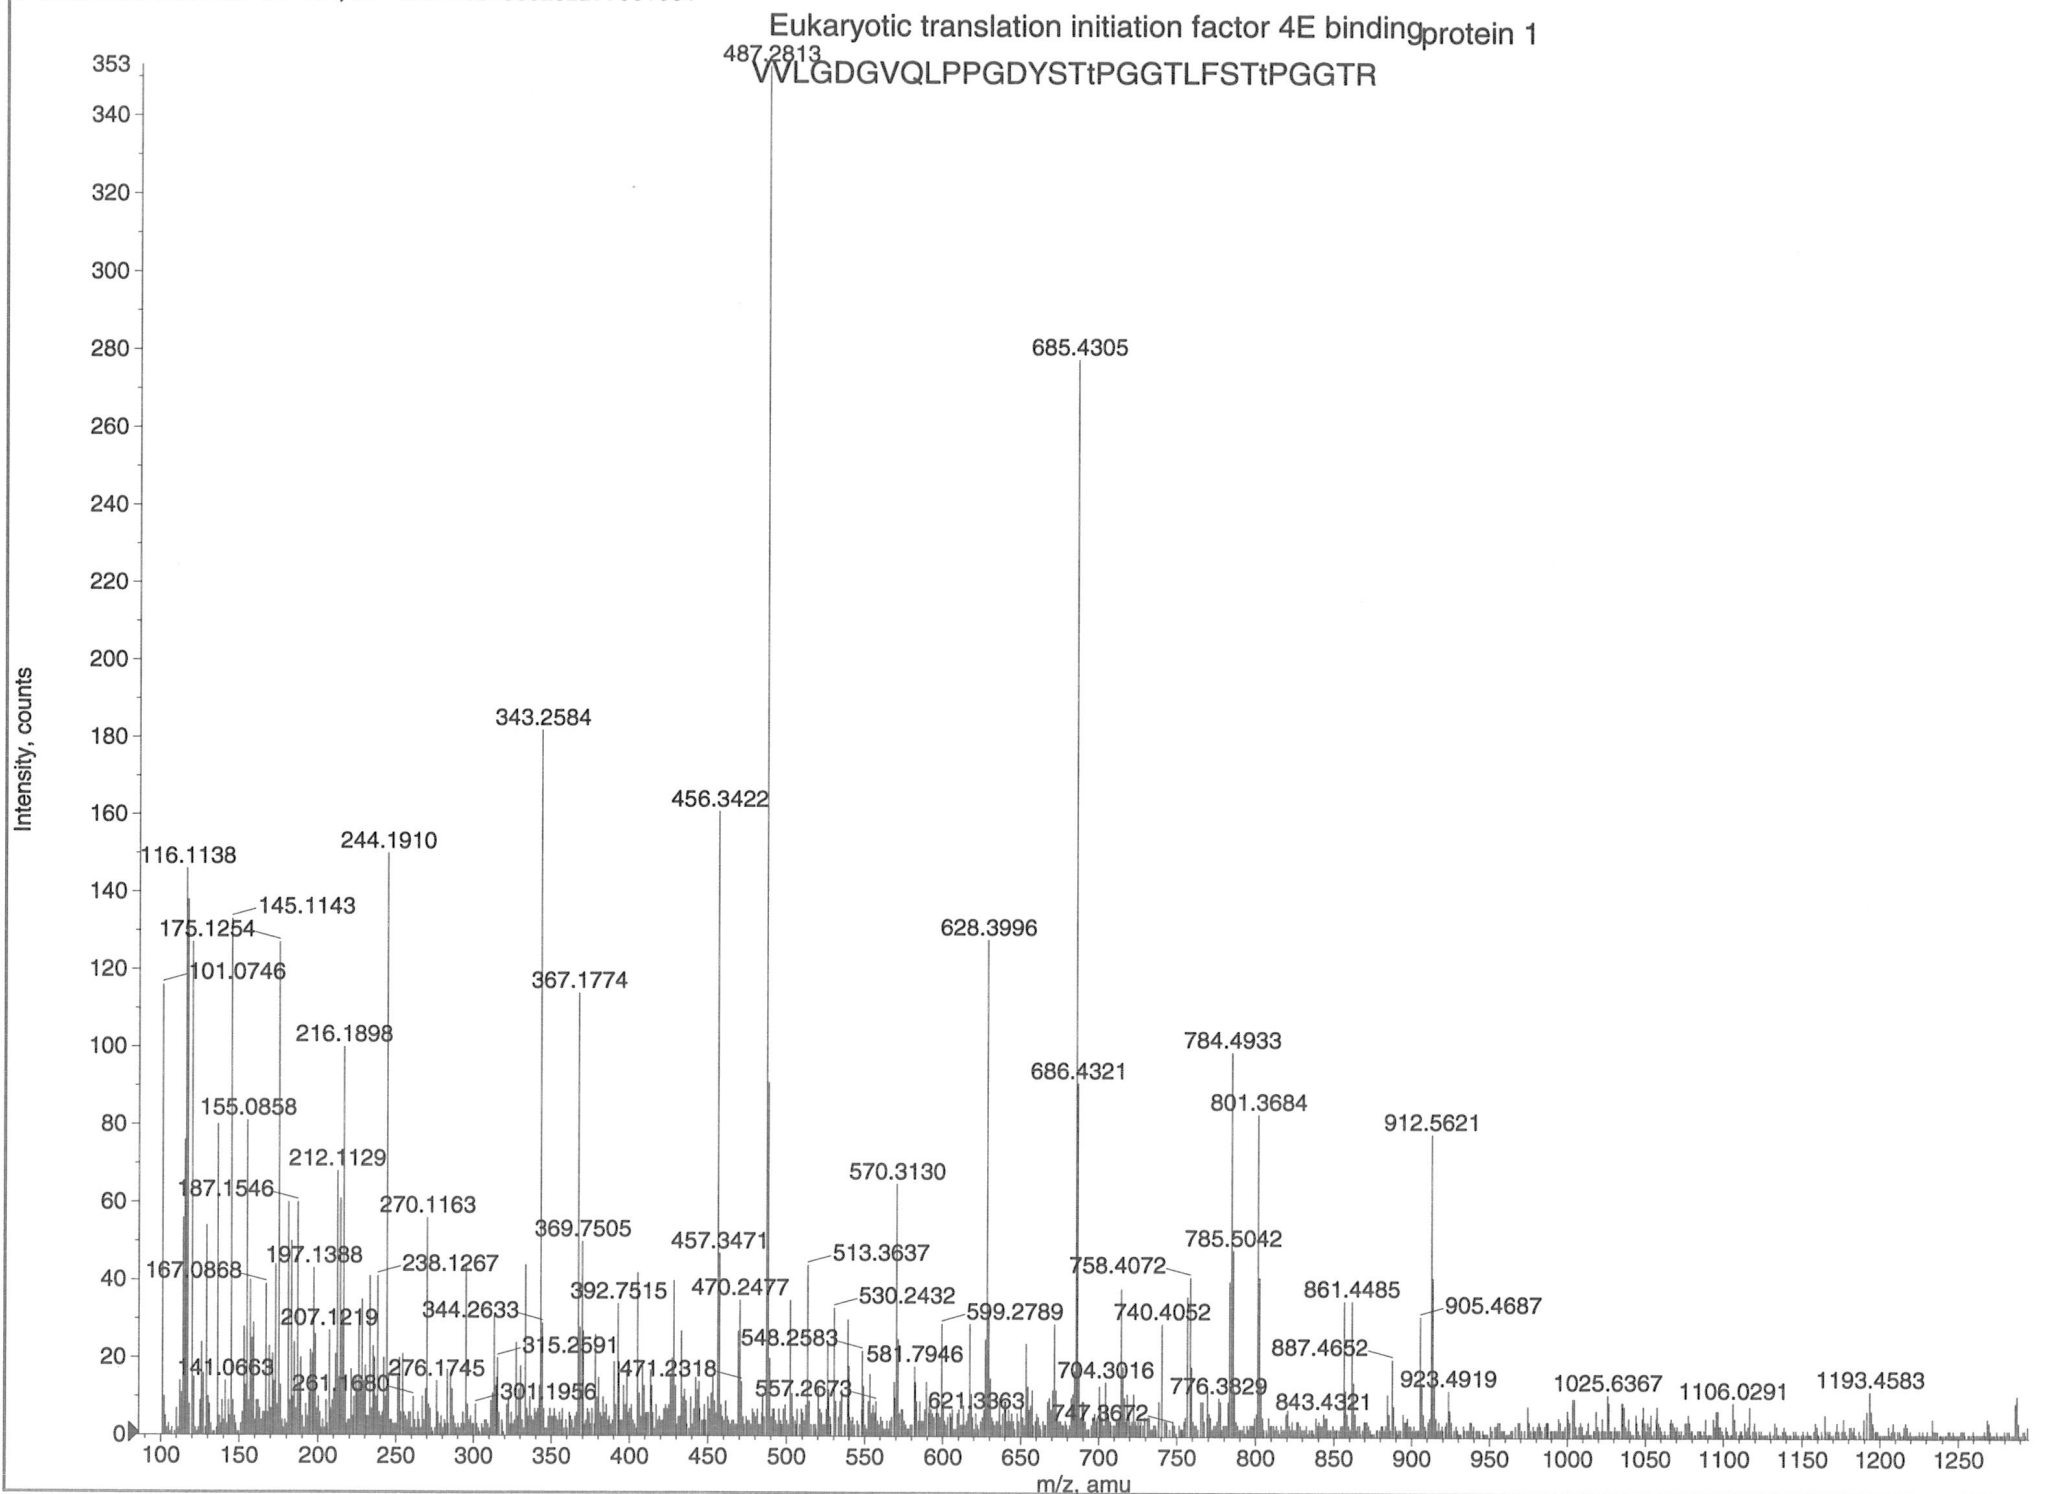

Eukaryotic translation initiation factor 4E binding protein 1  
VVLGDGVQLPPGDYSTTPGGTLFS<sup>tt</sup>PGGTR

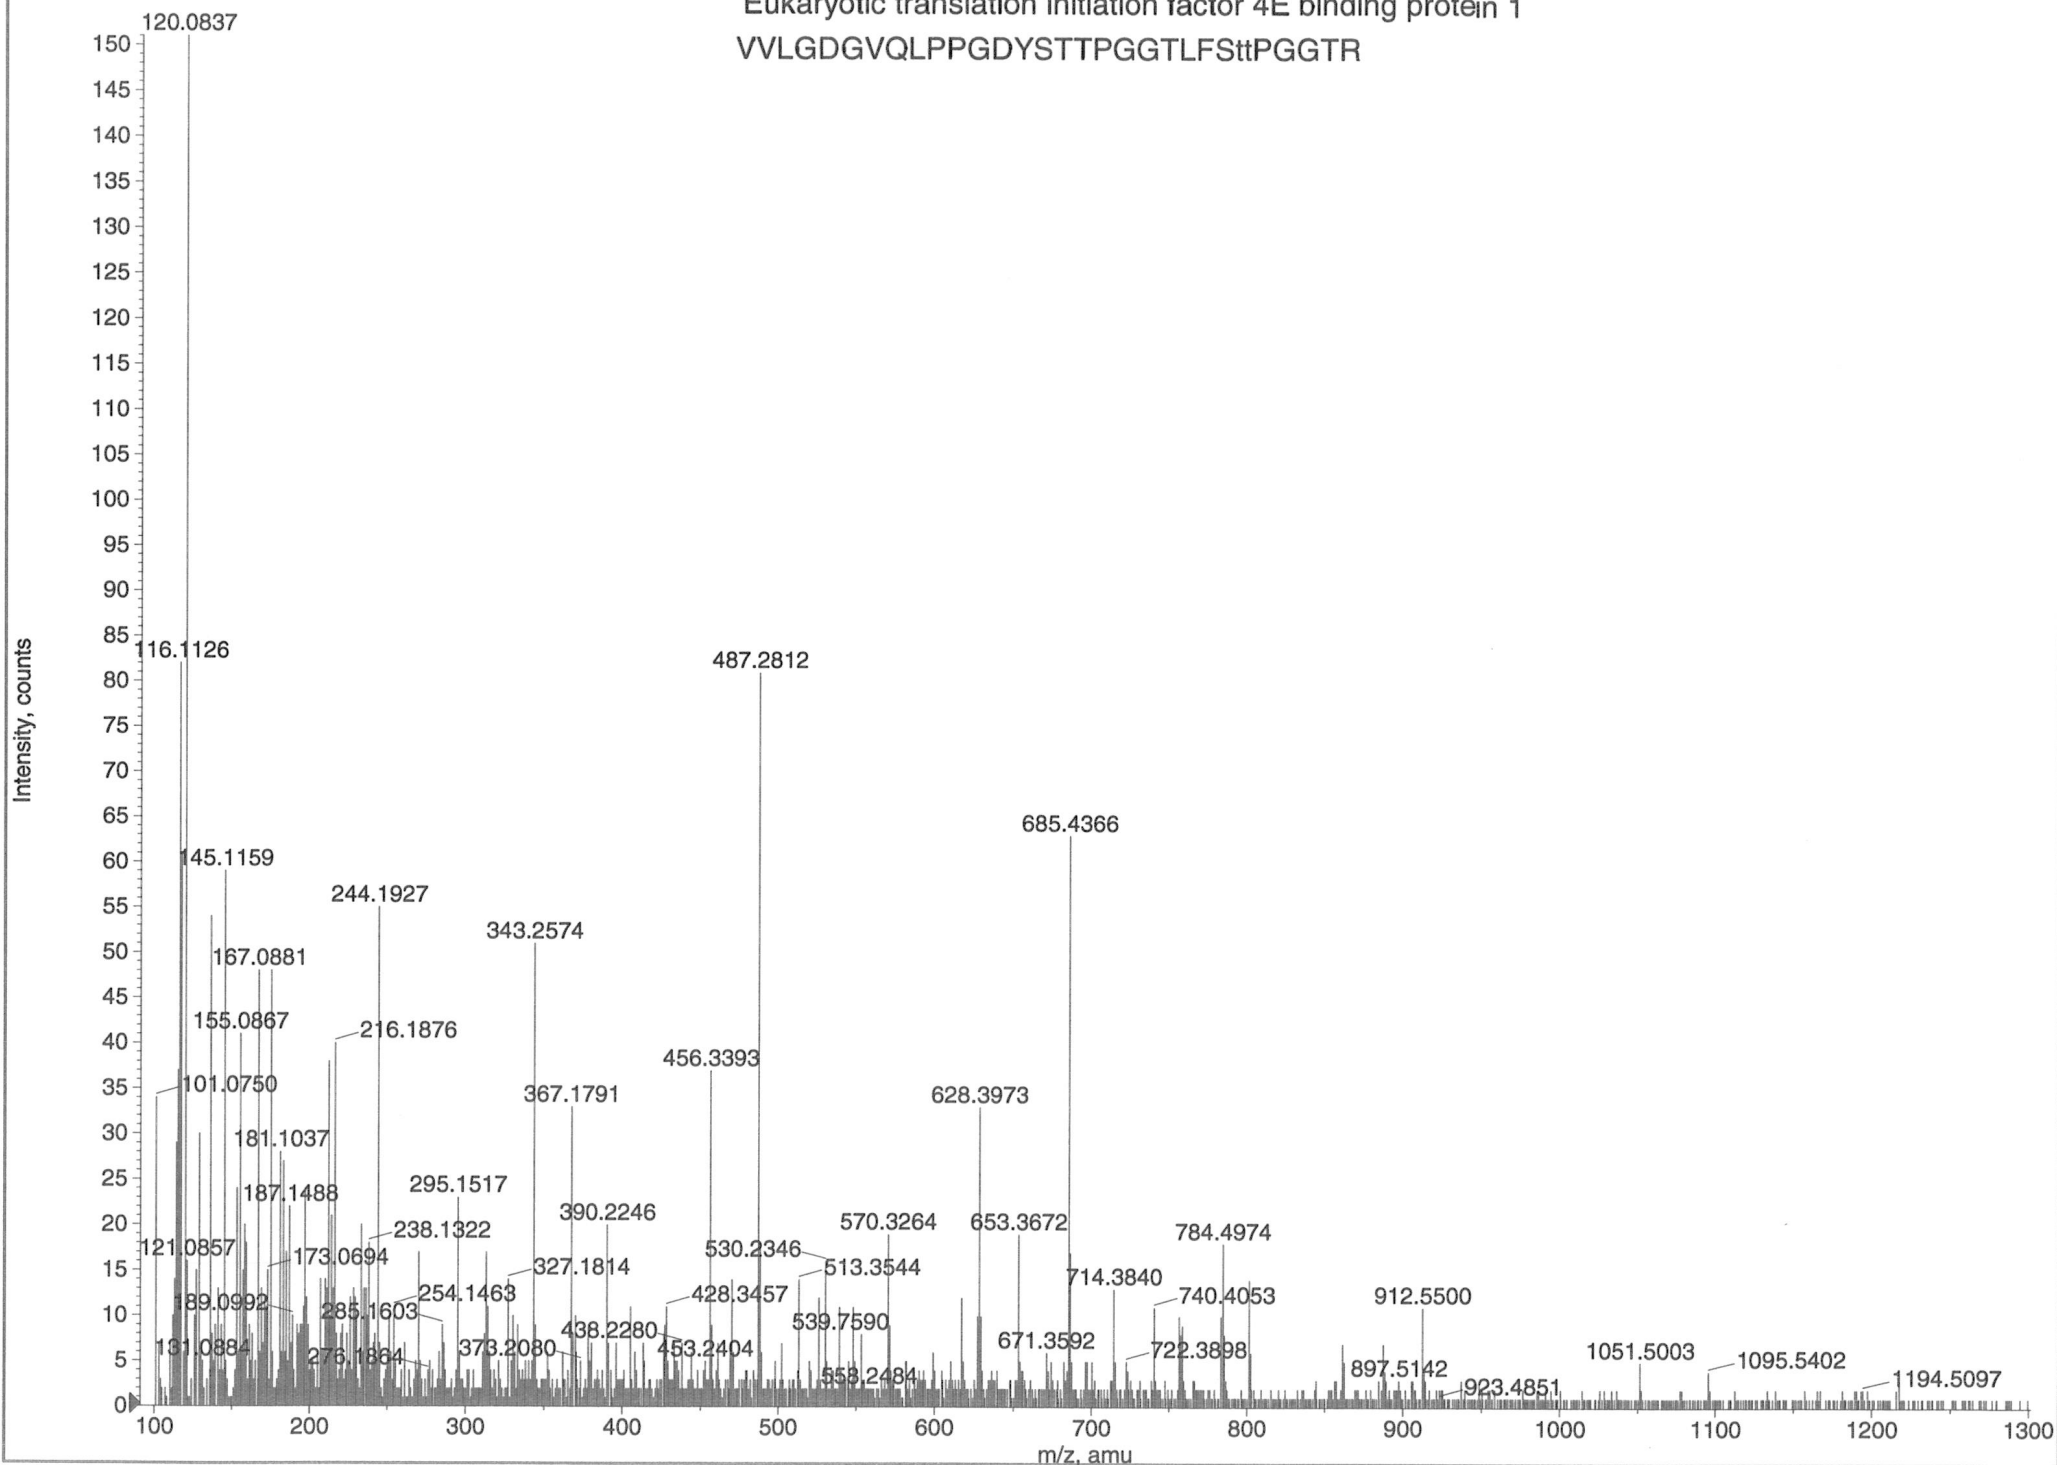

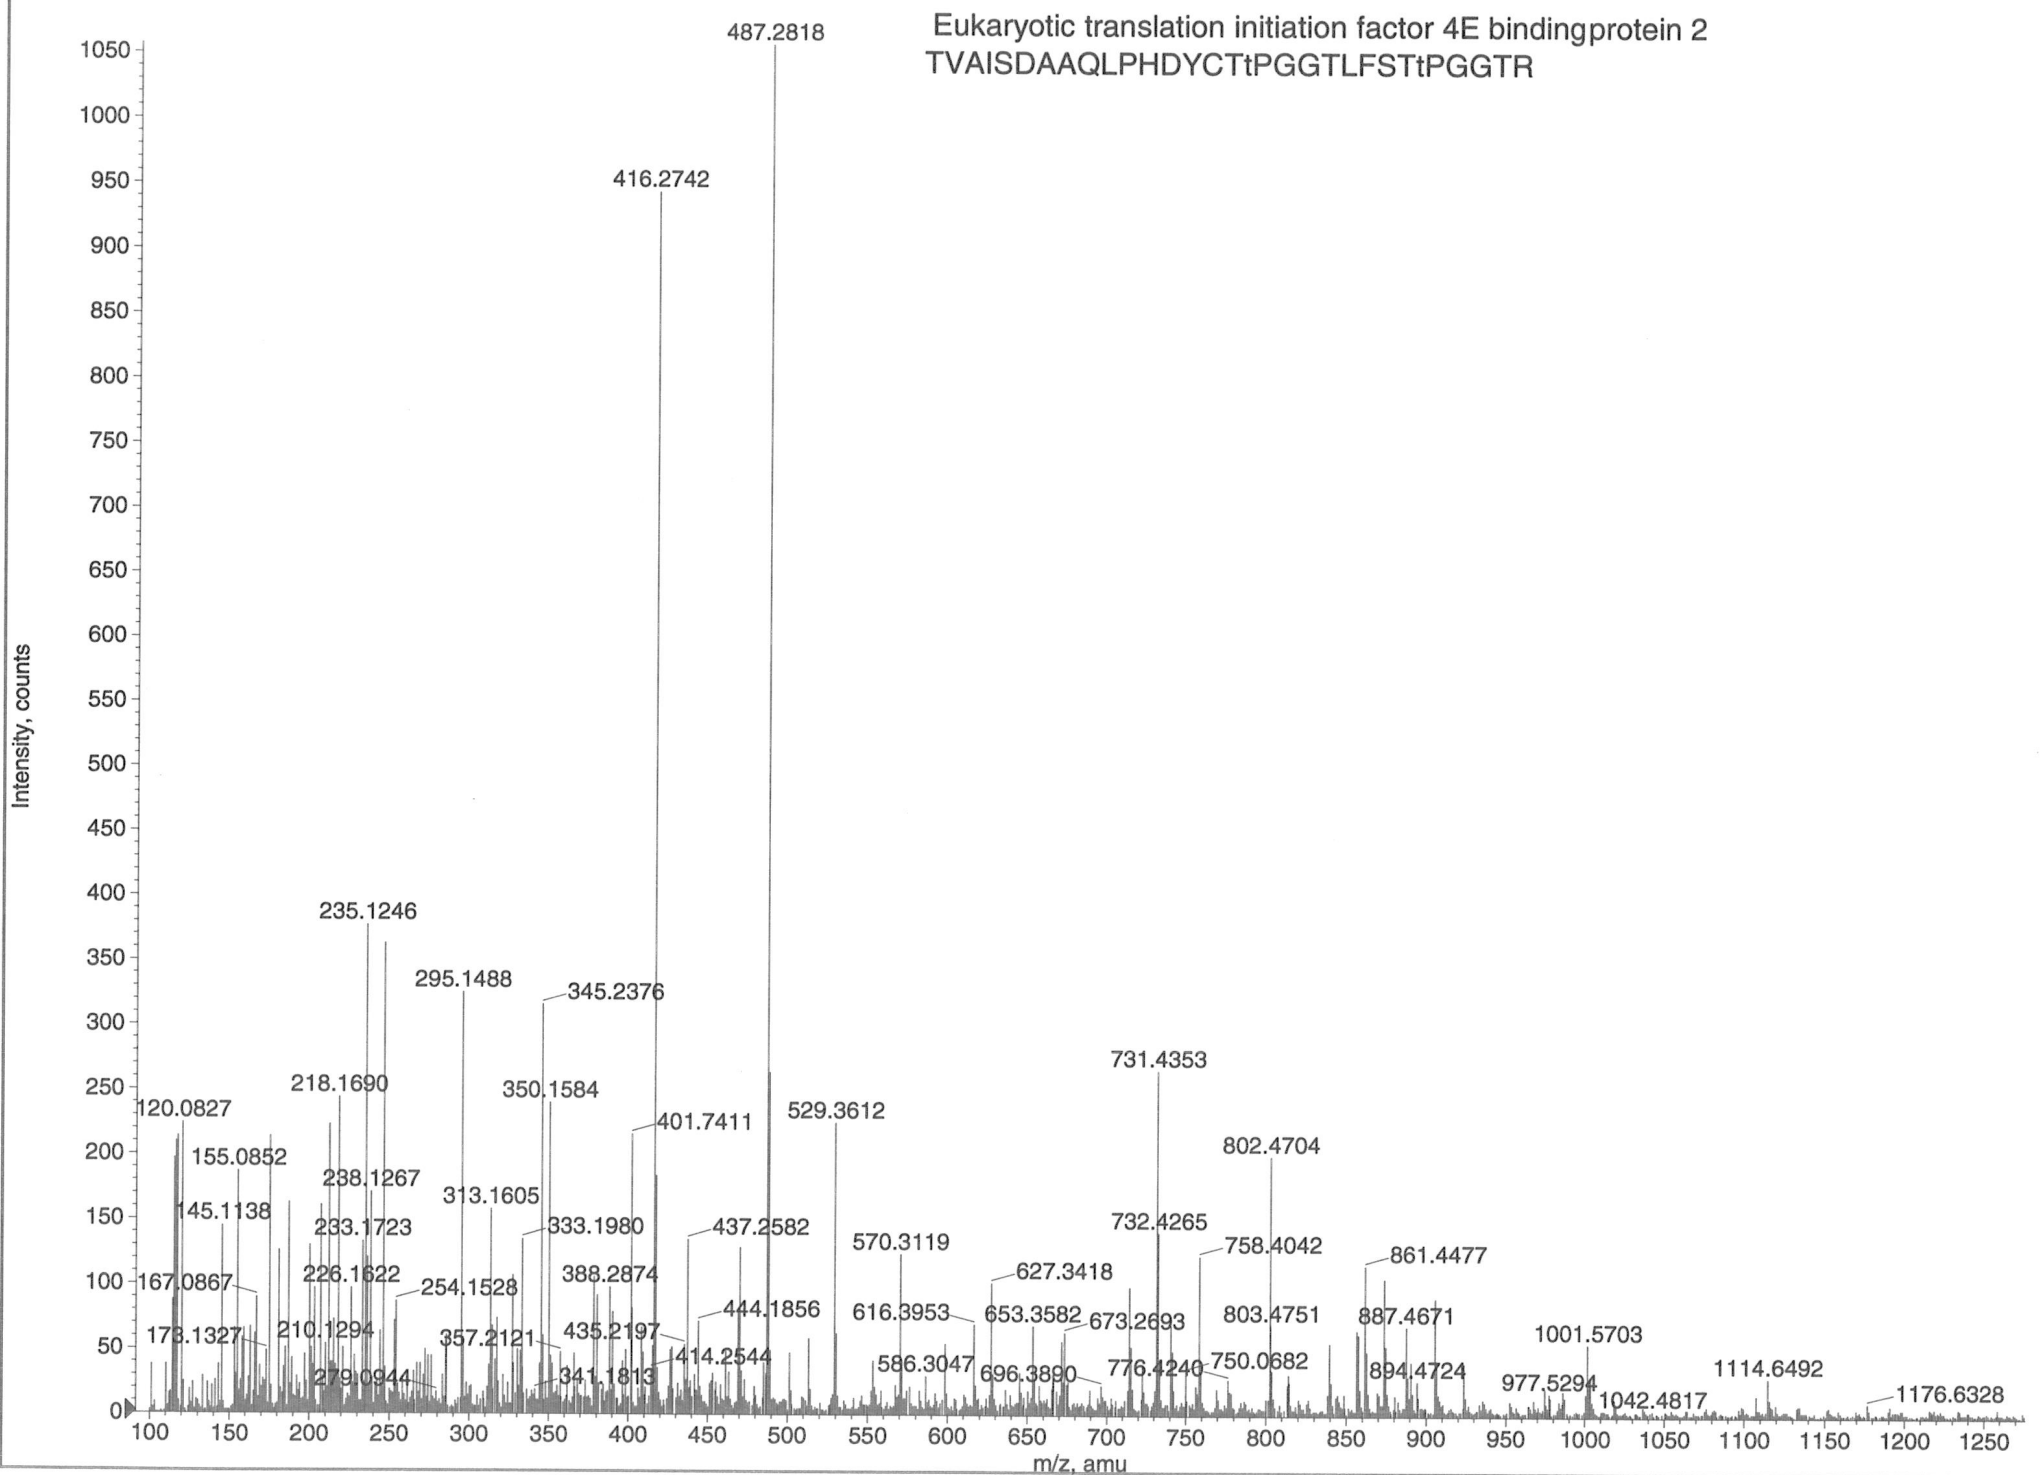

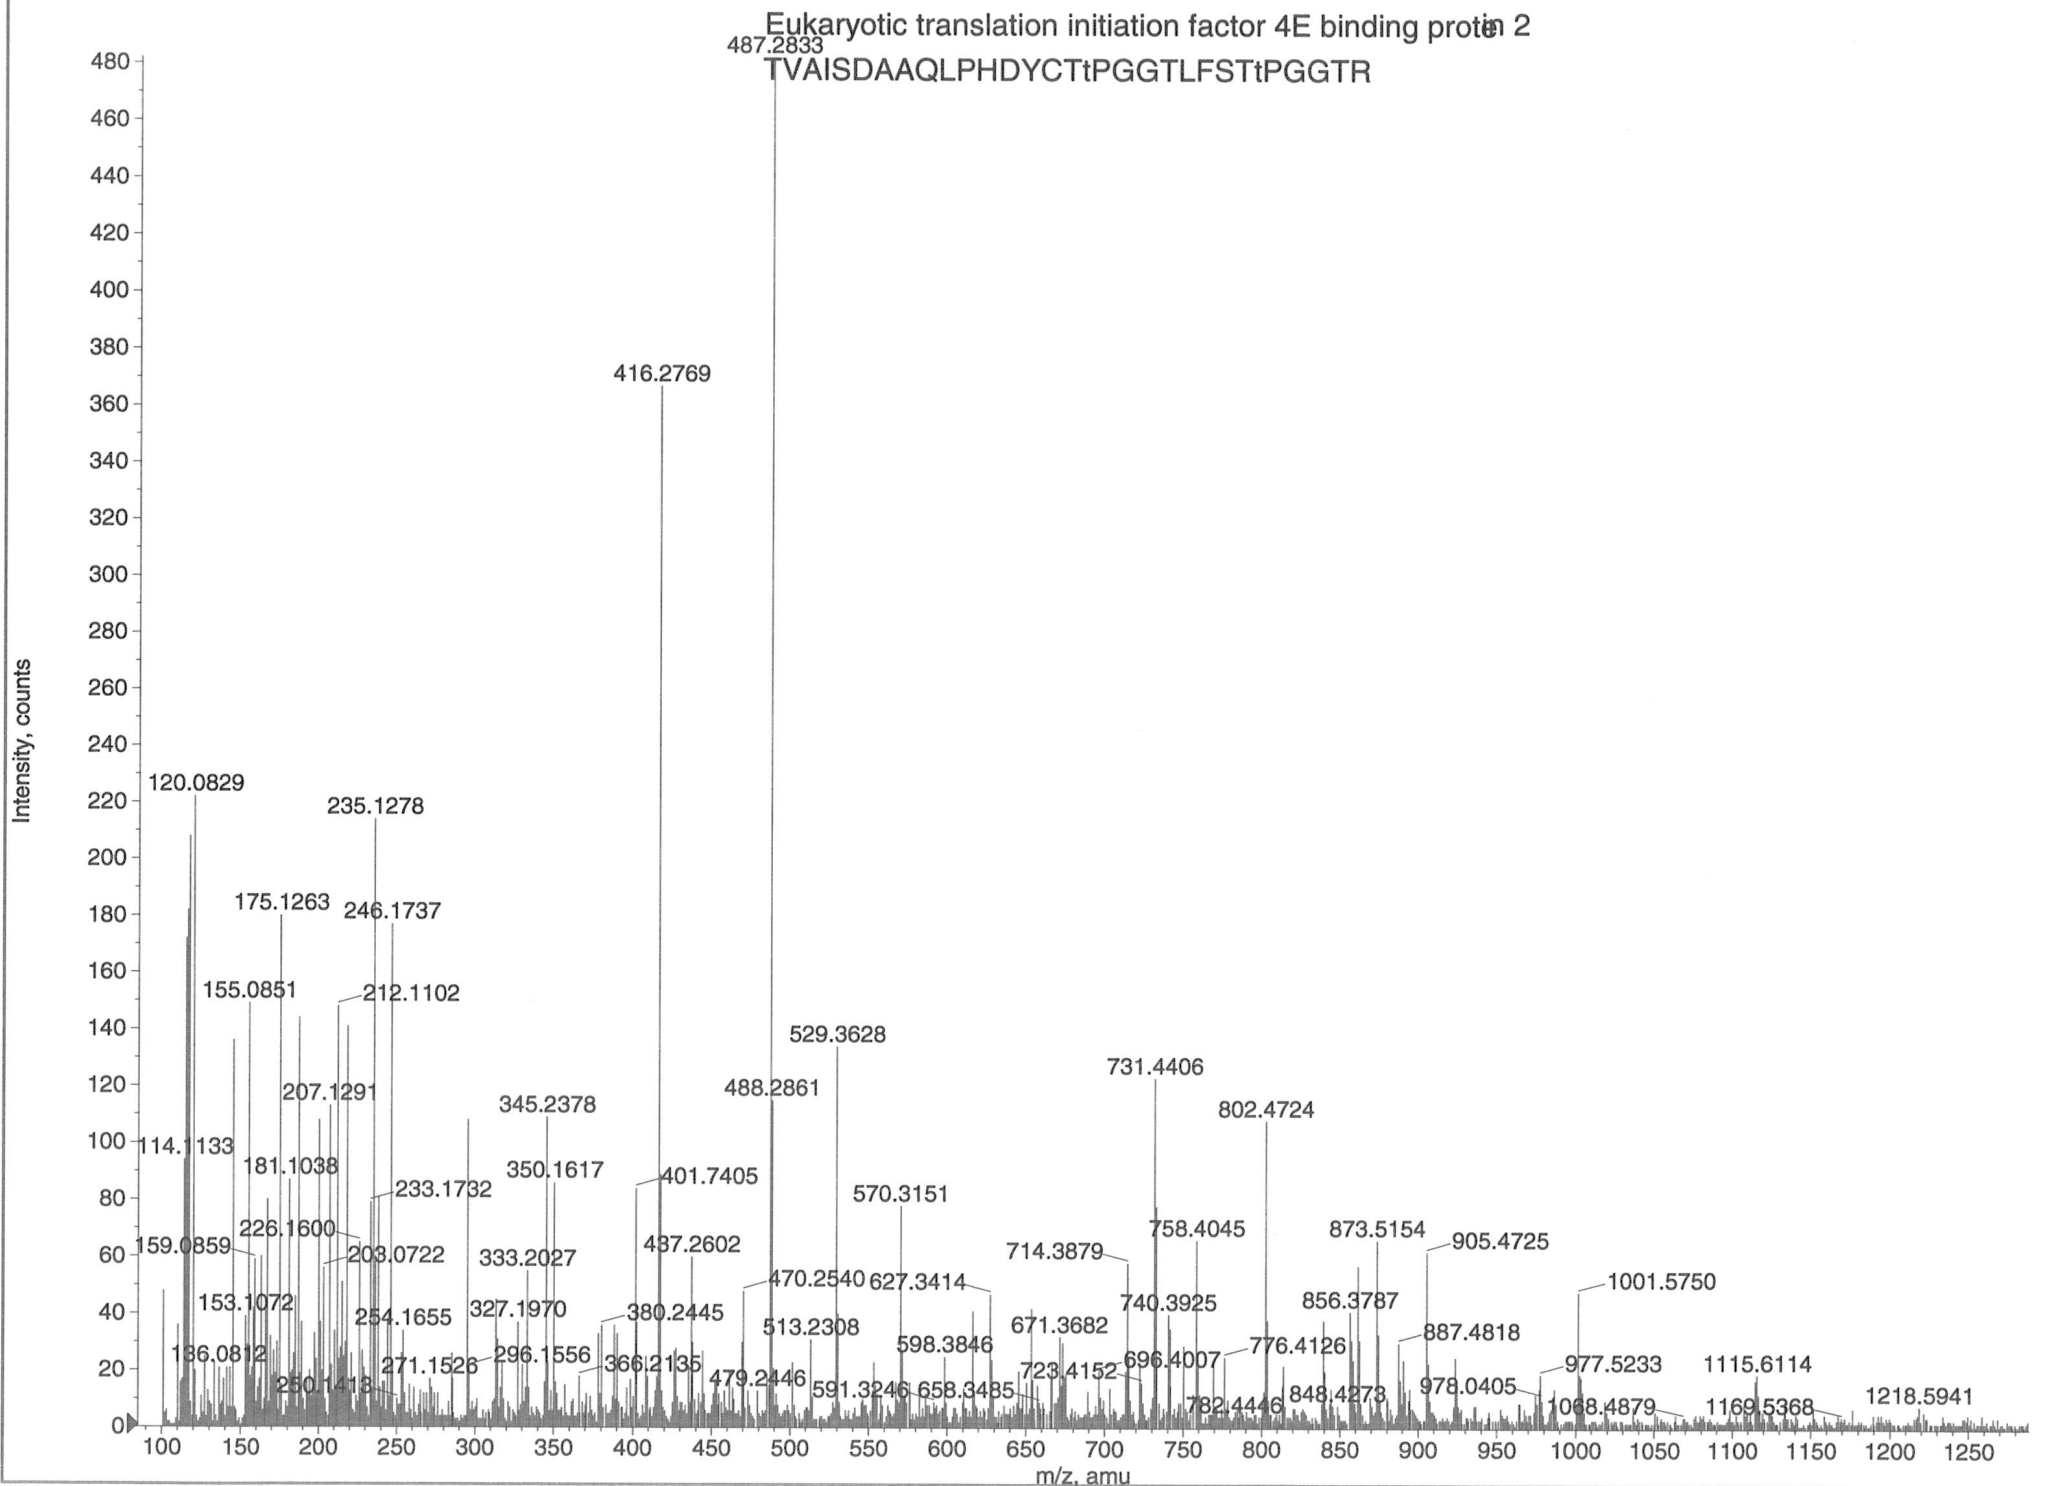

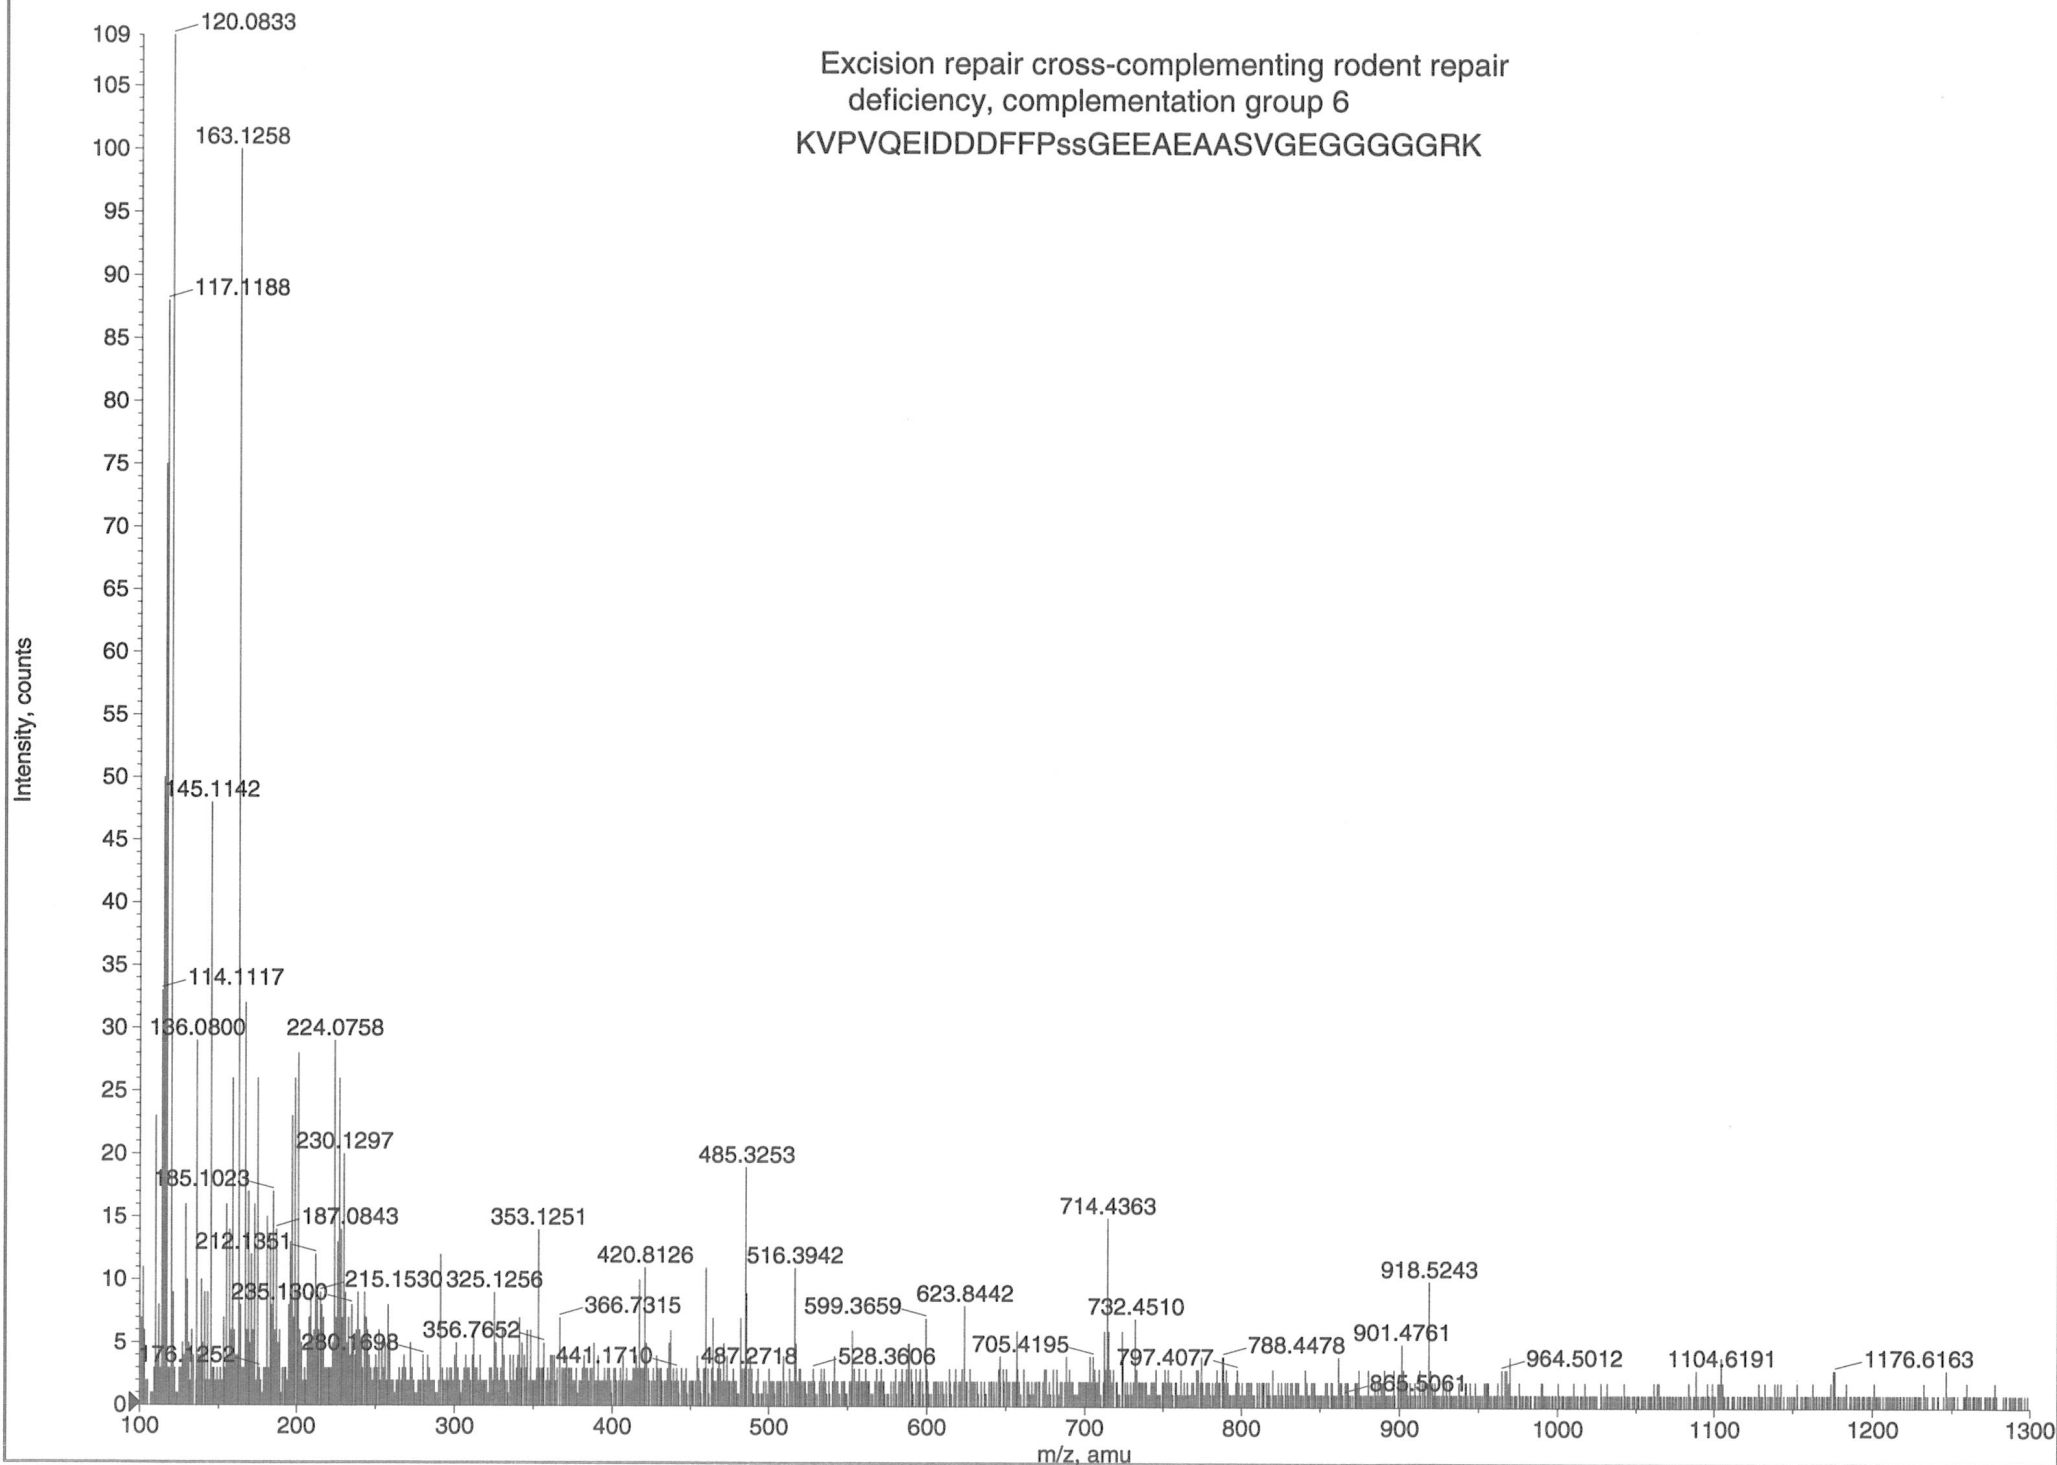



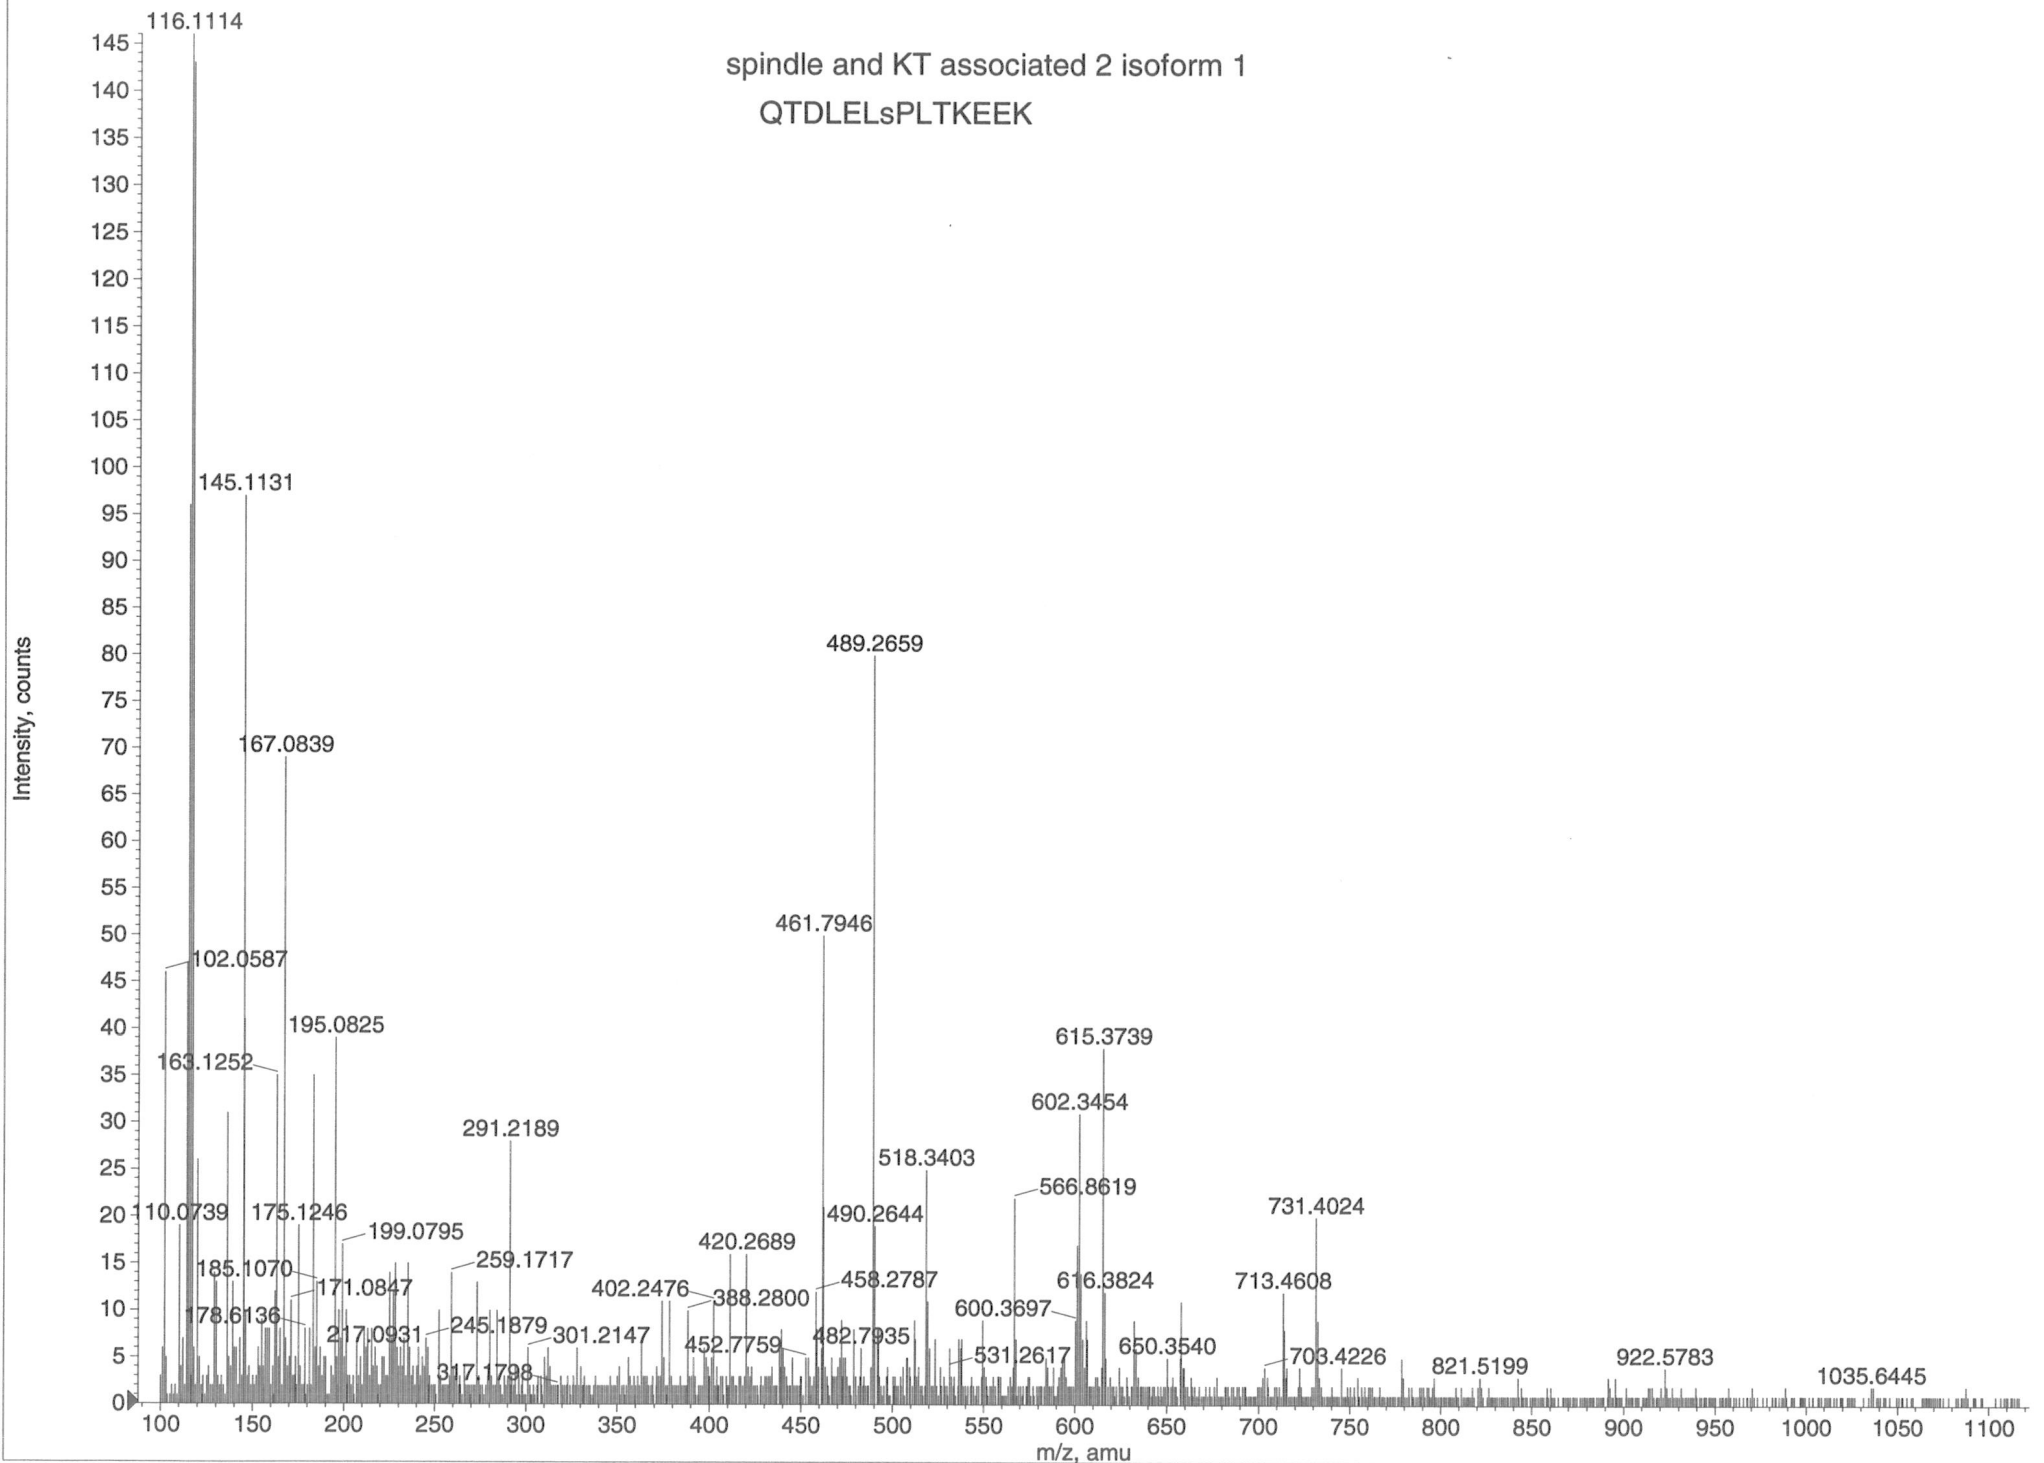

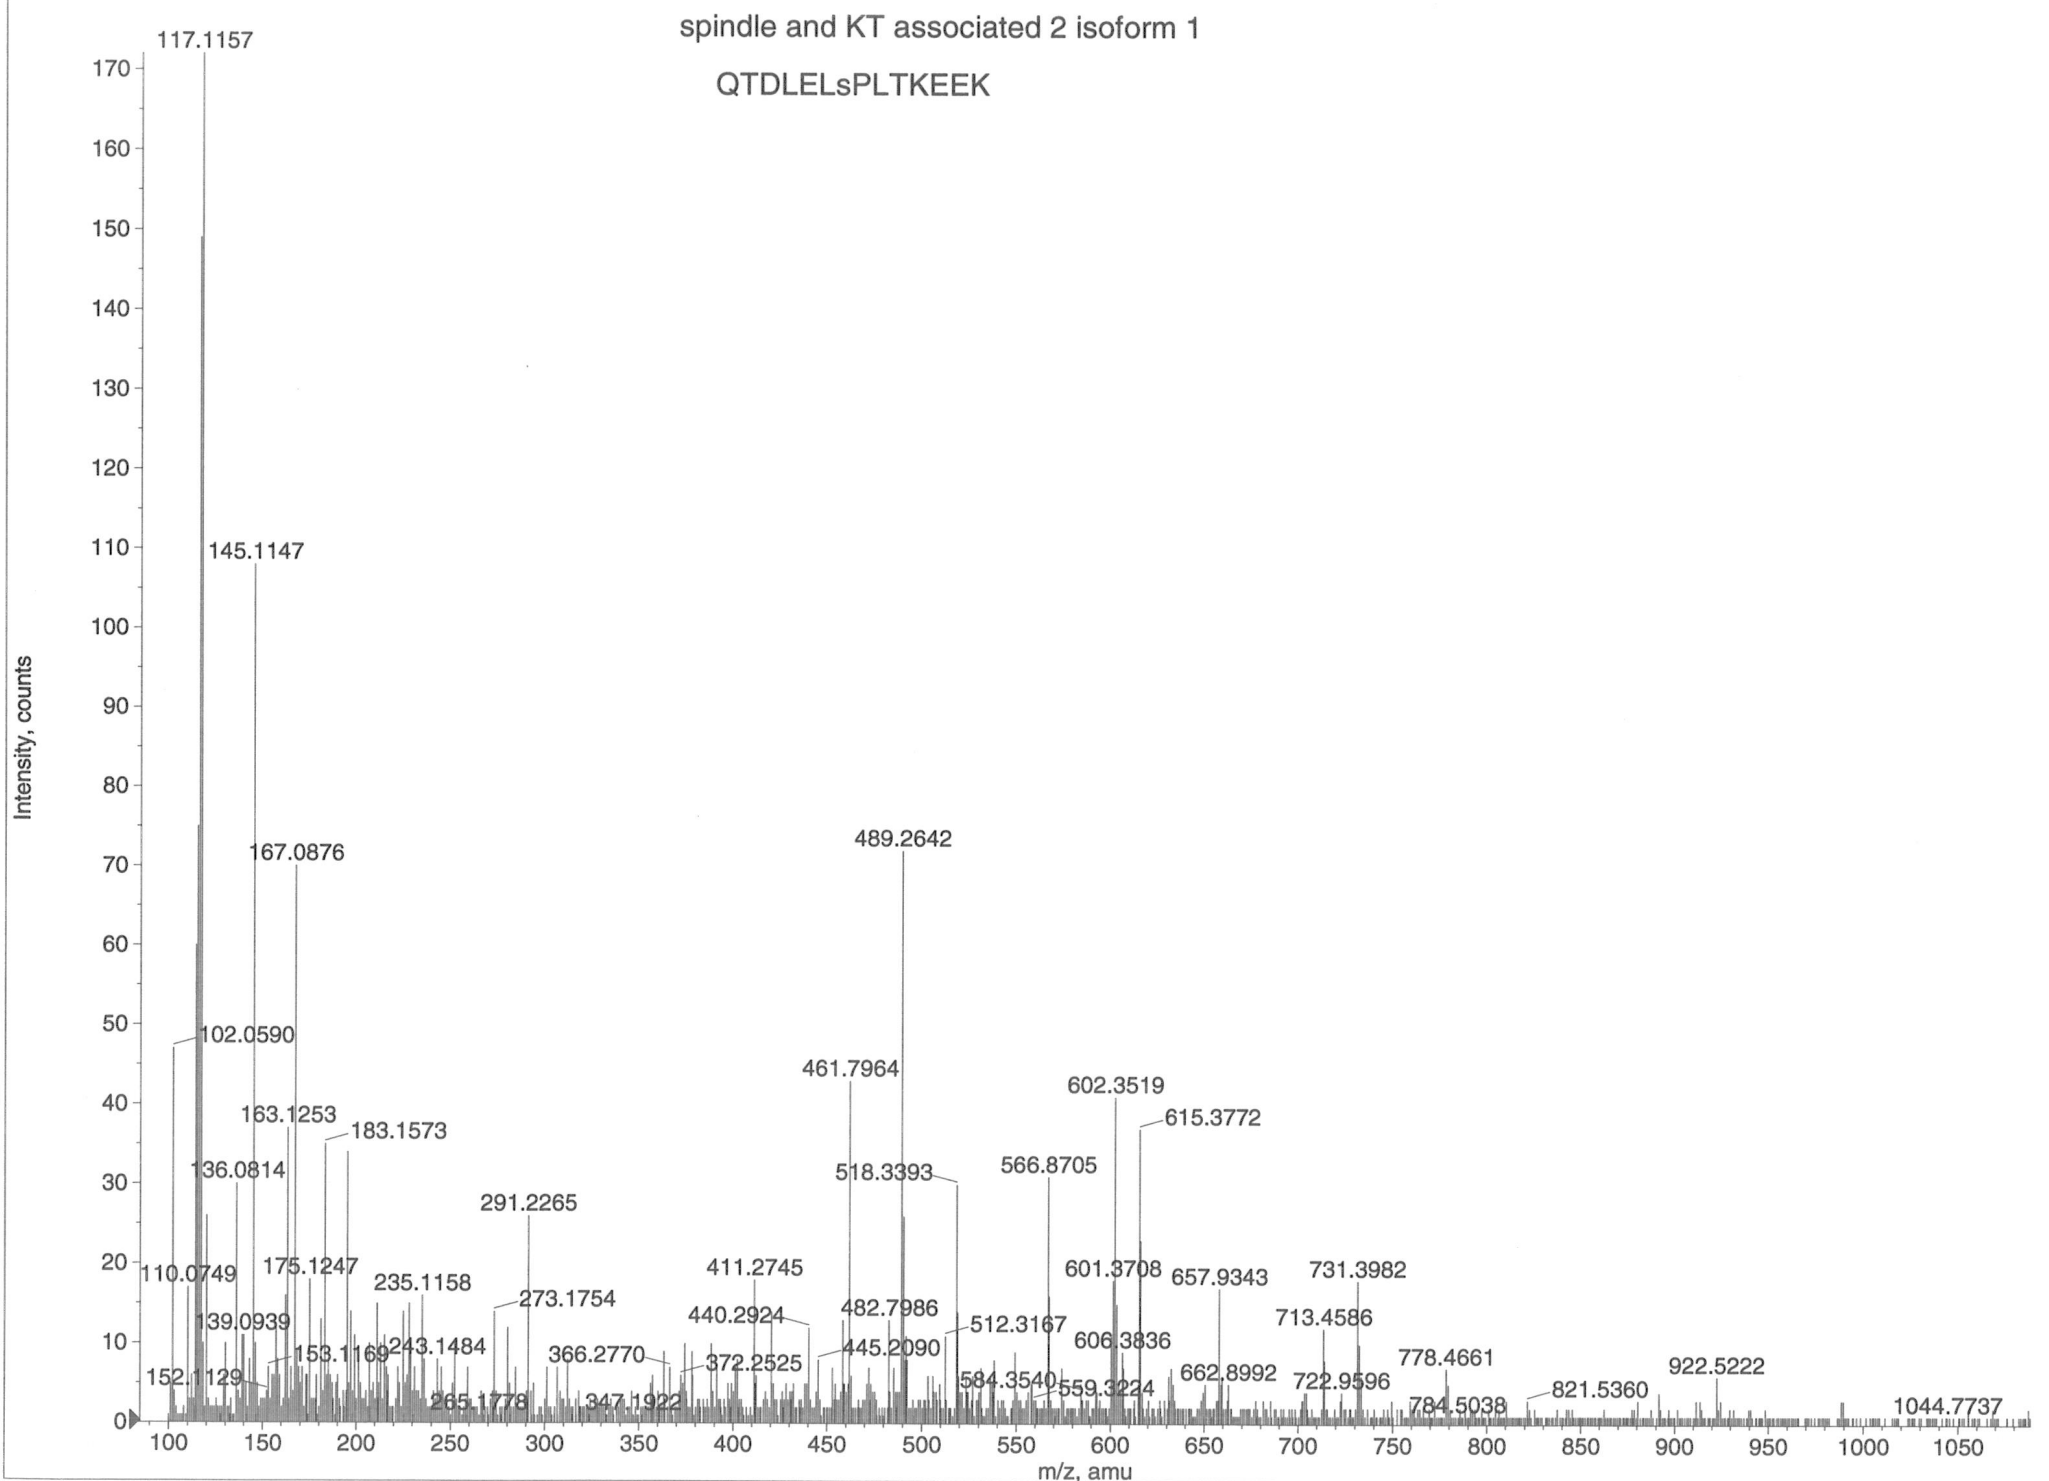

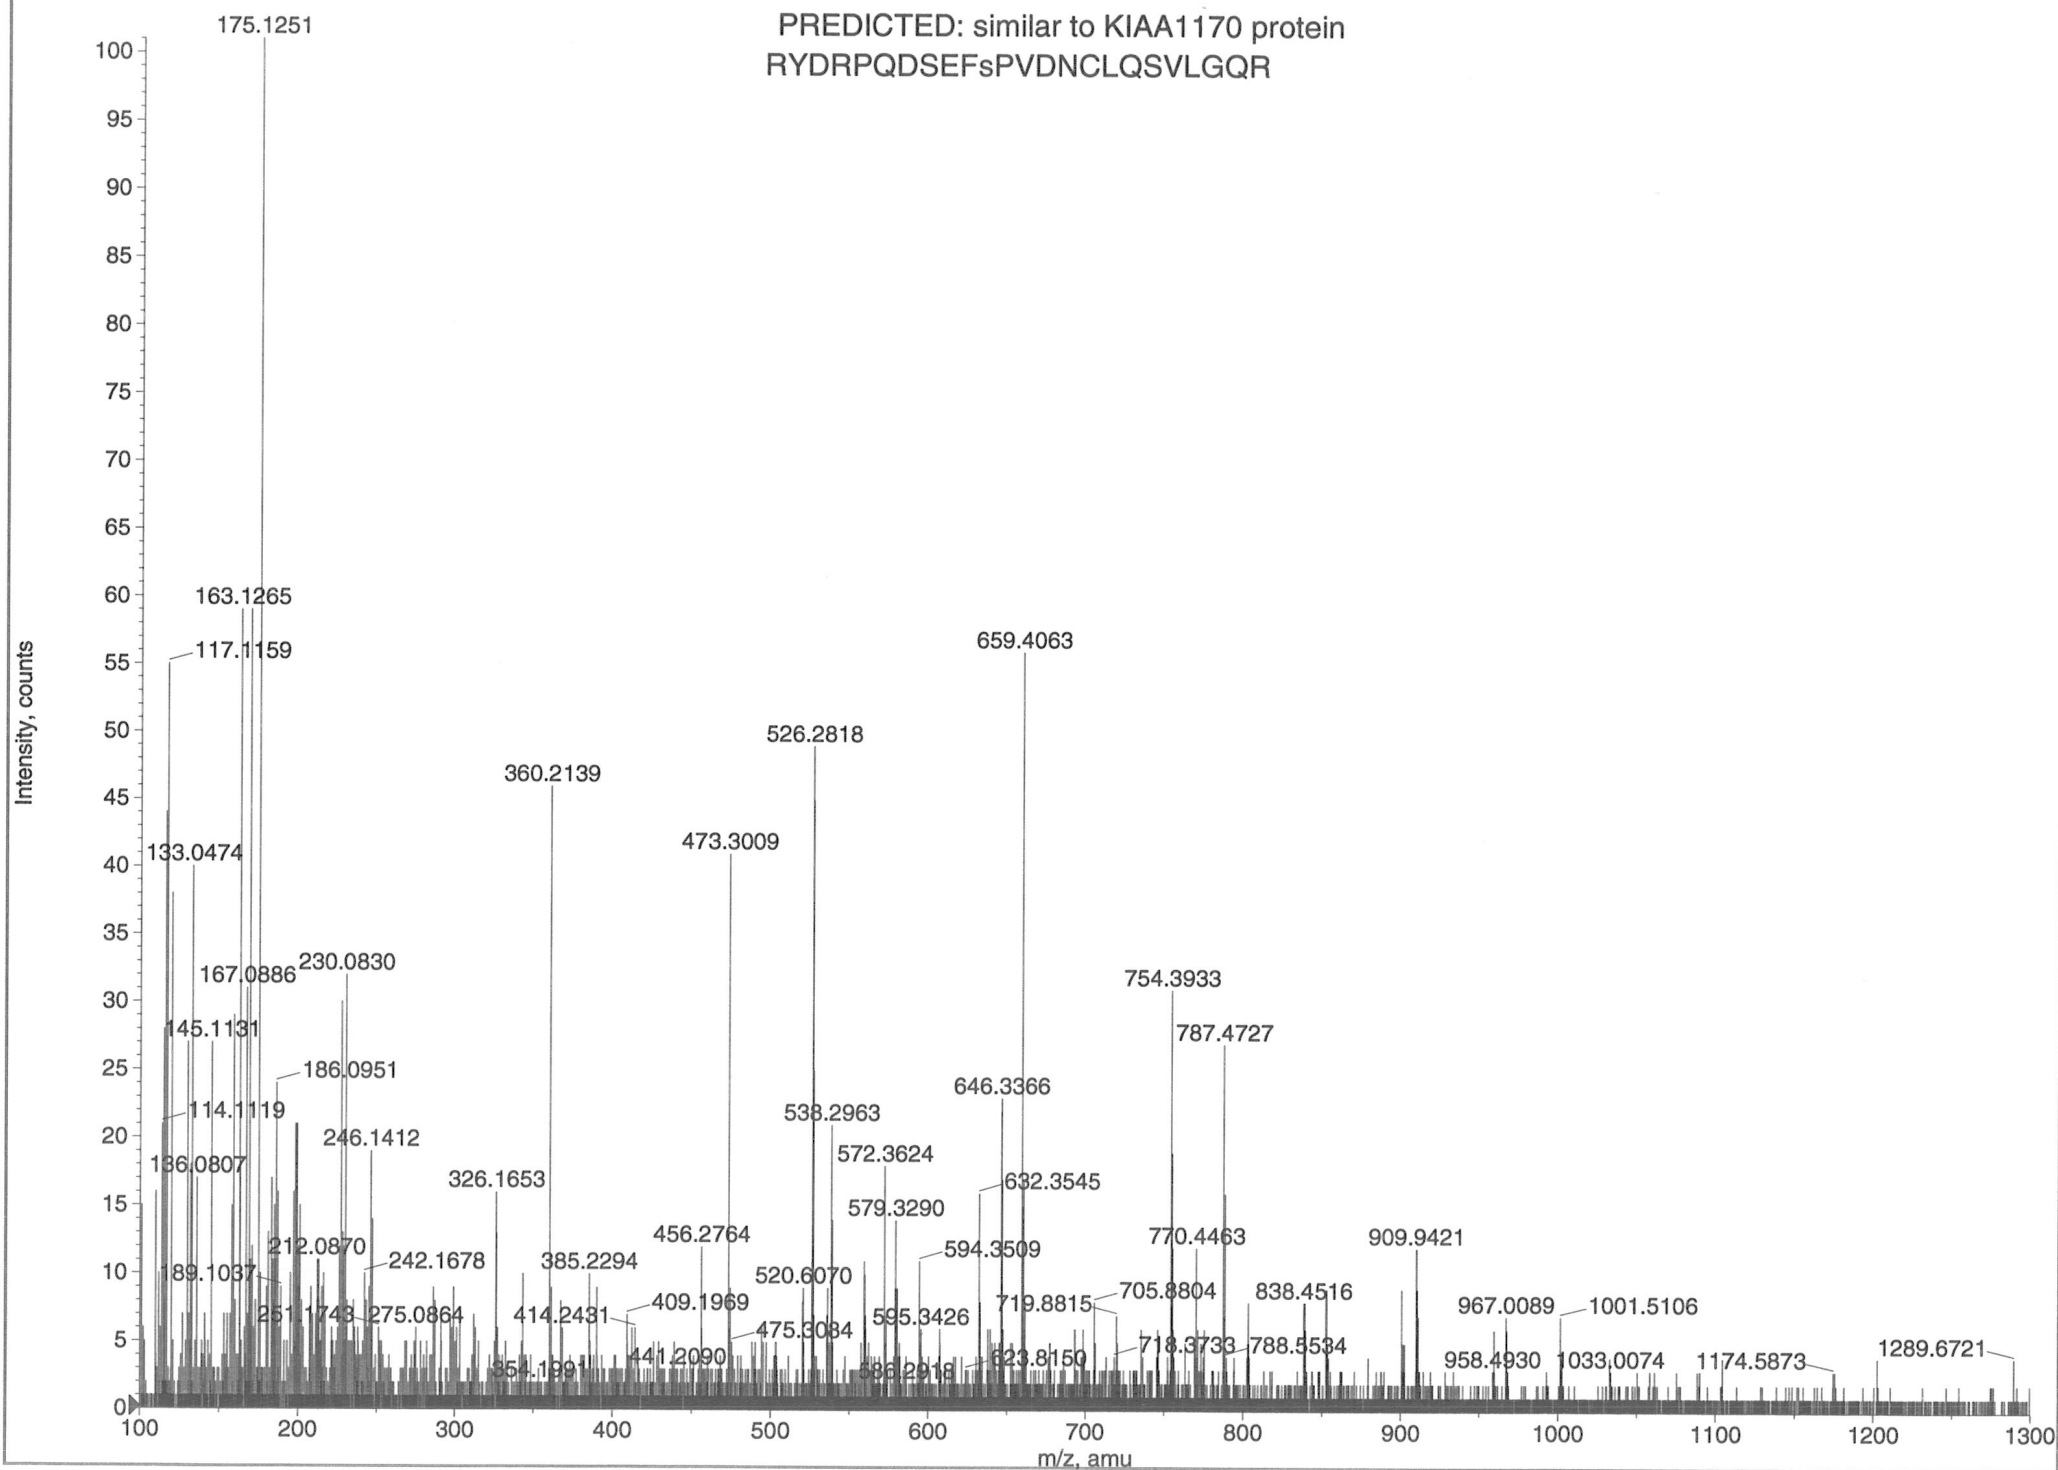

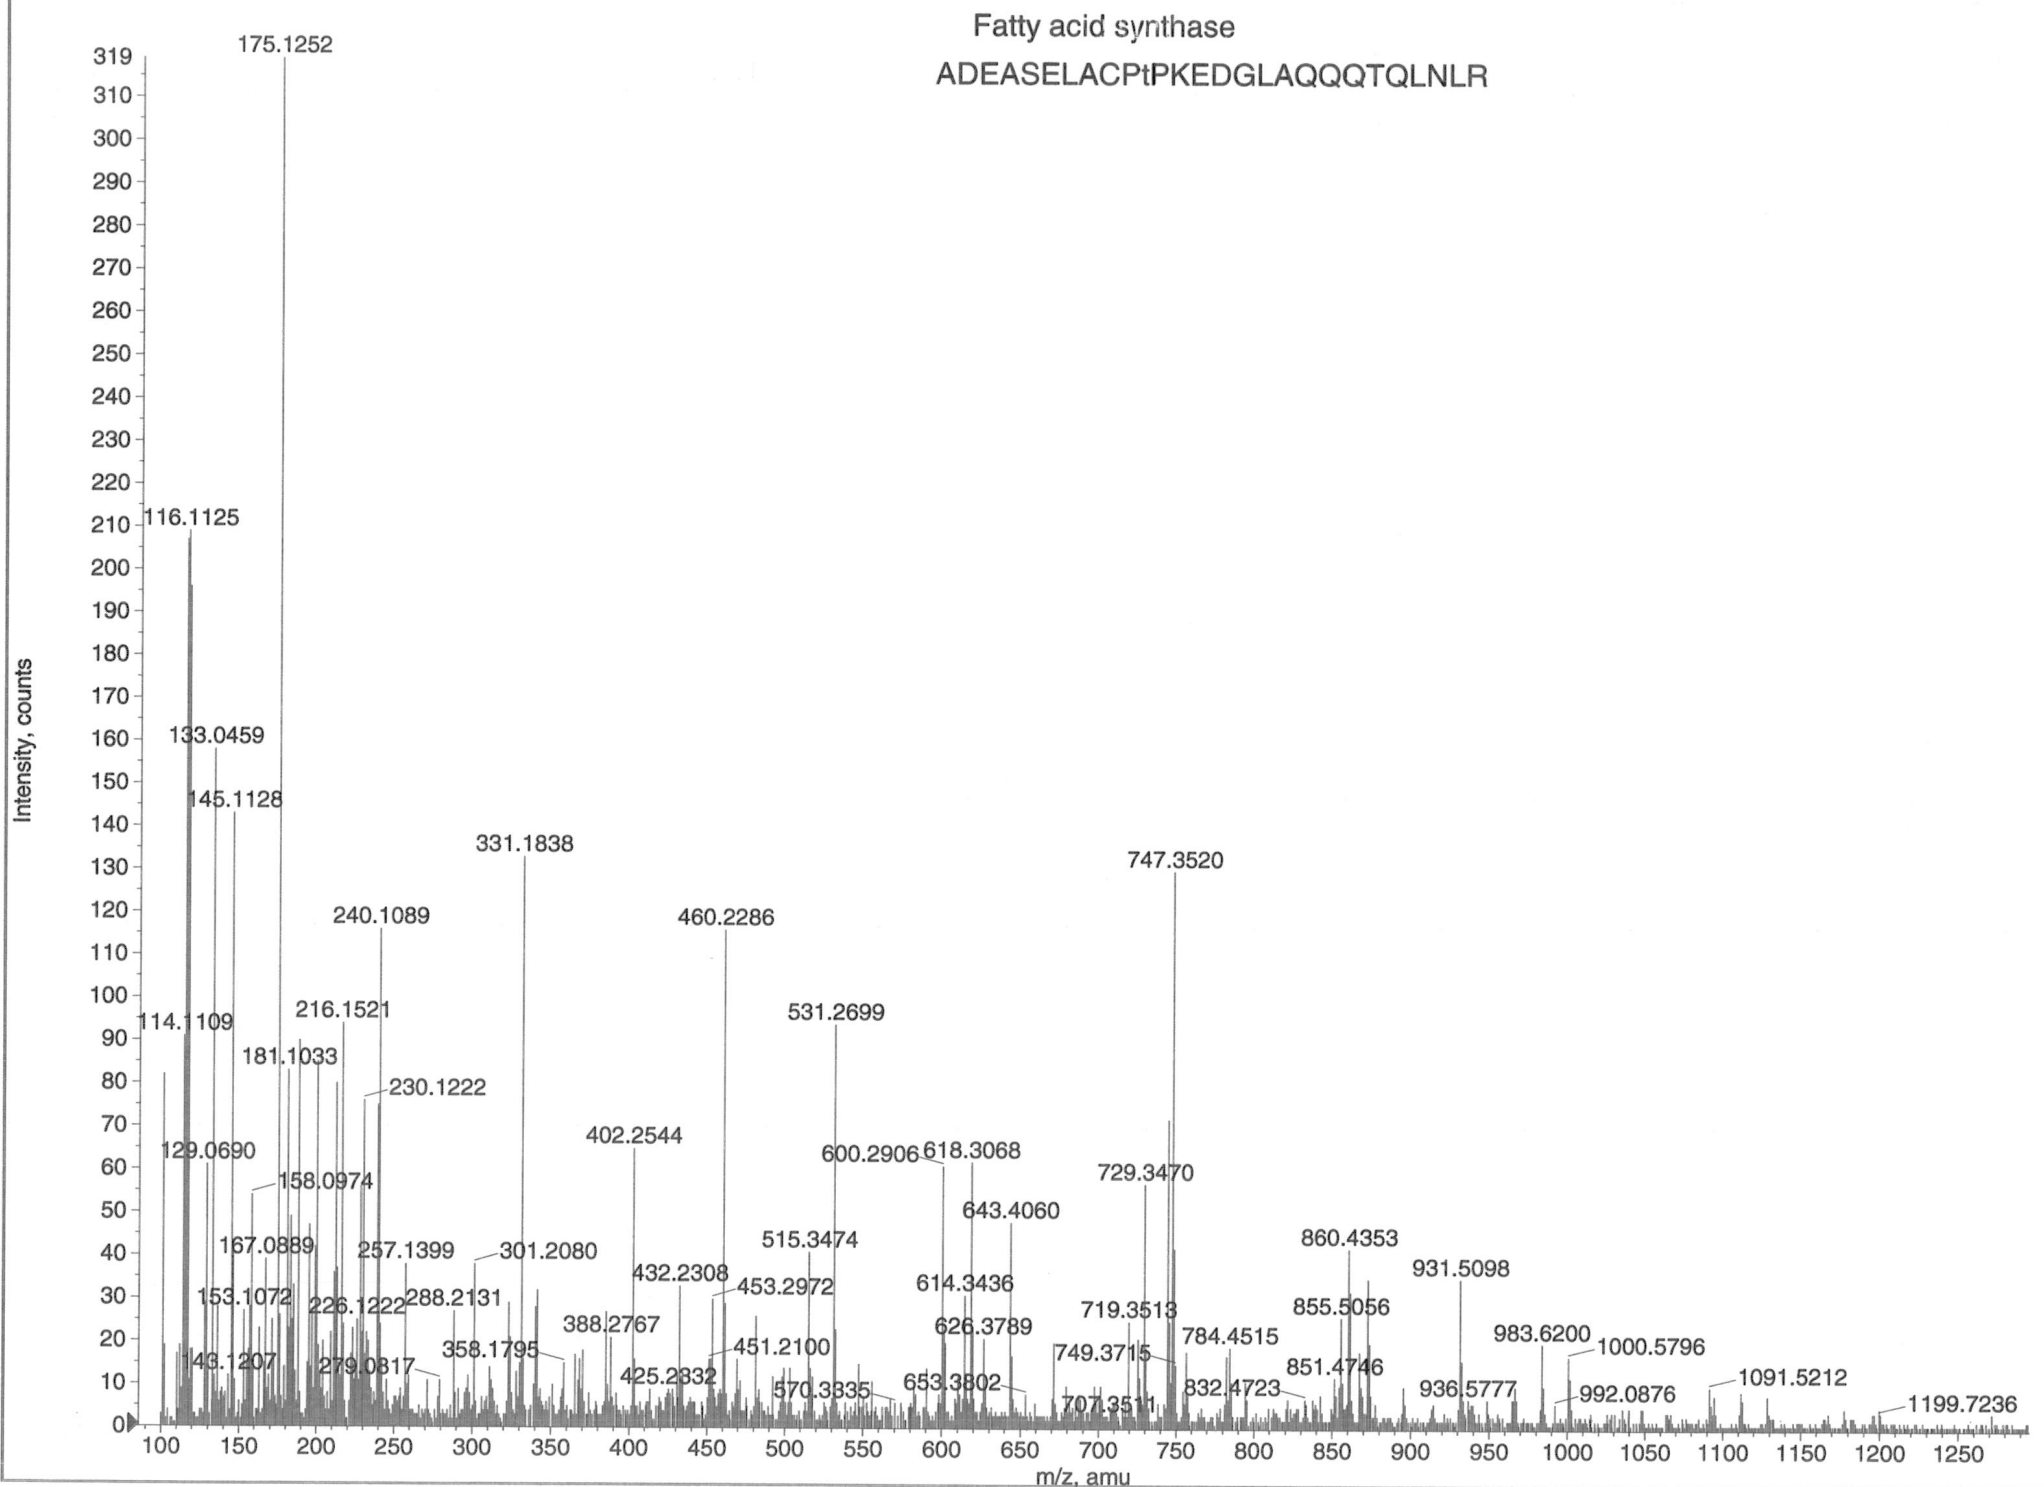

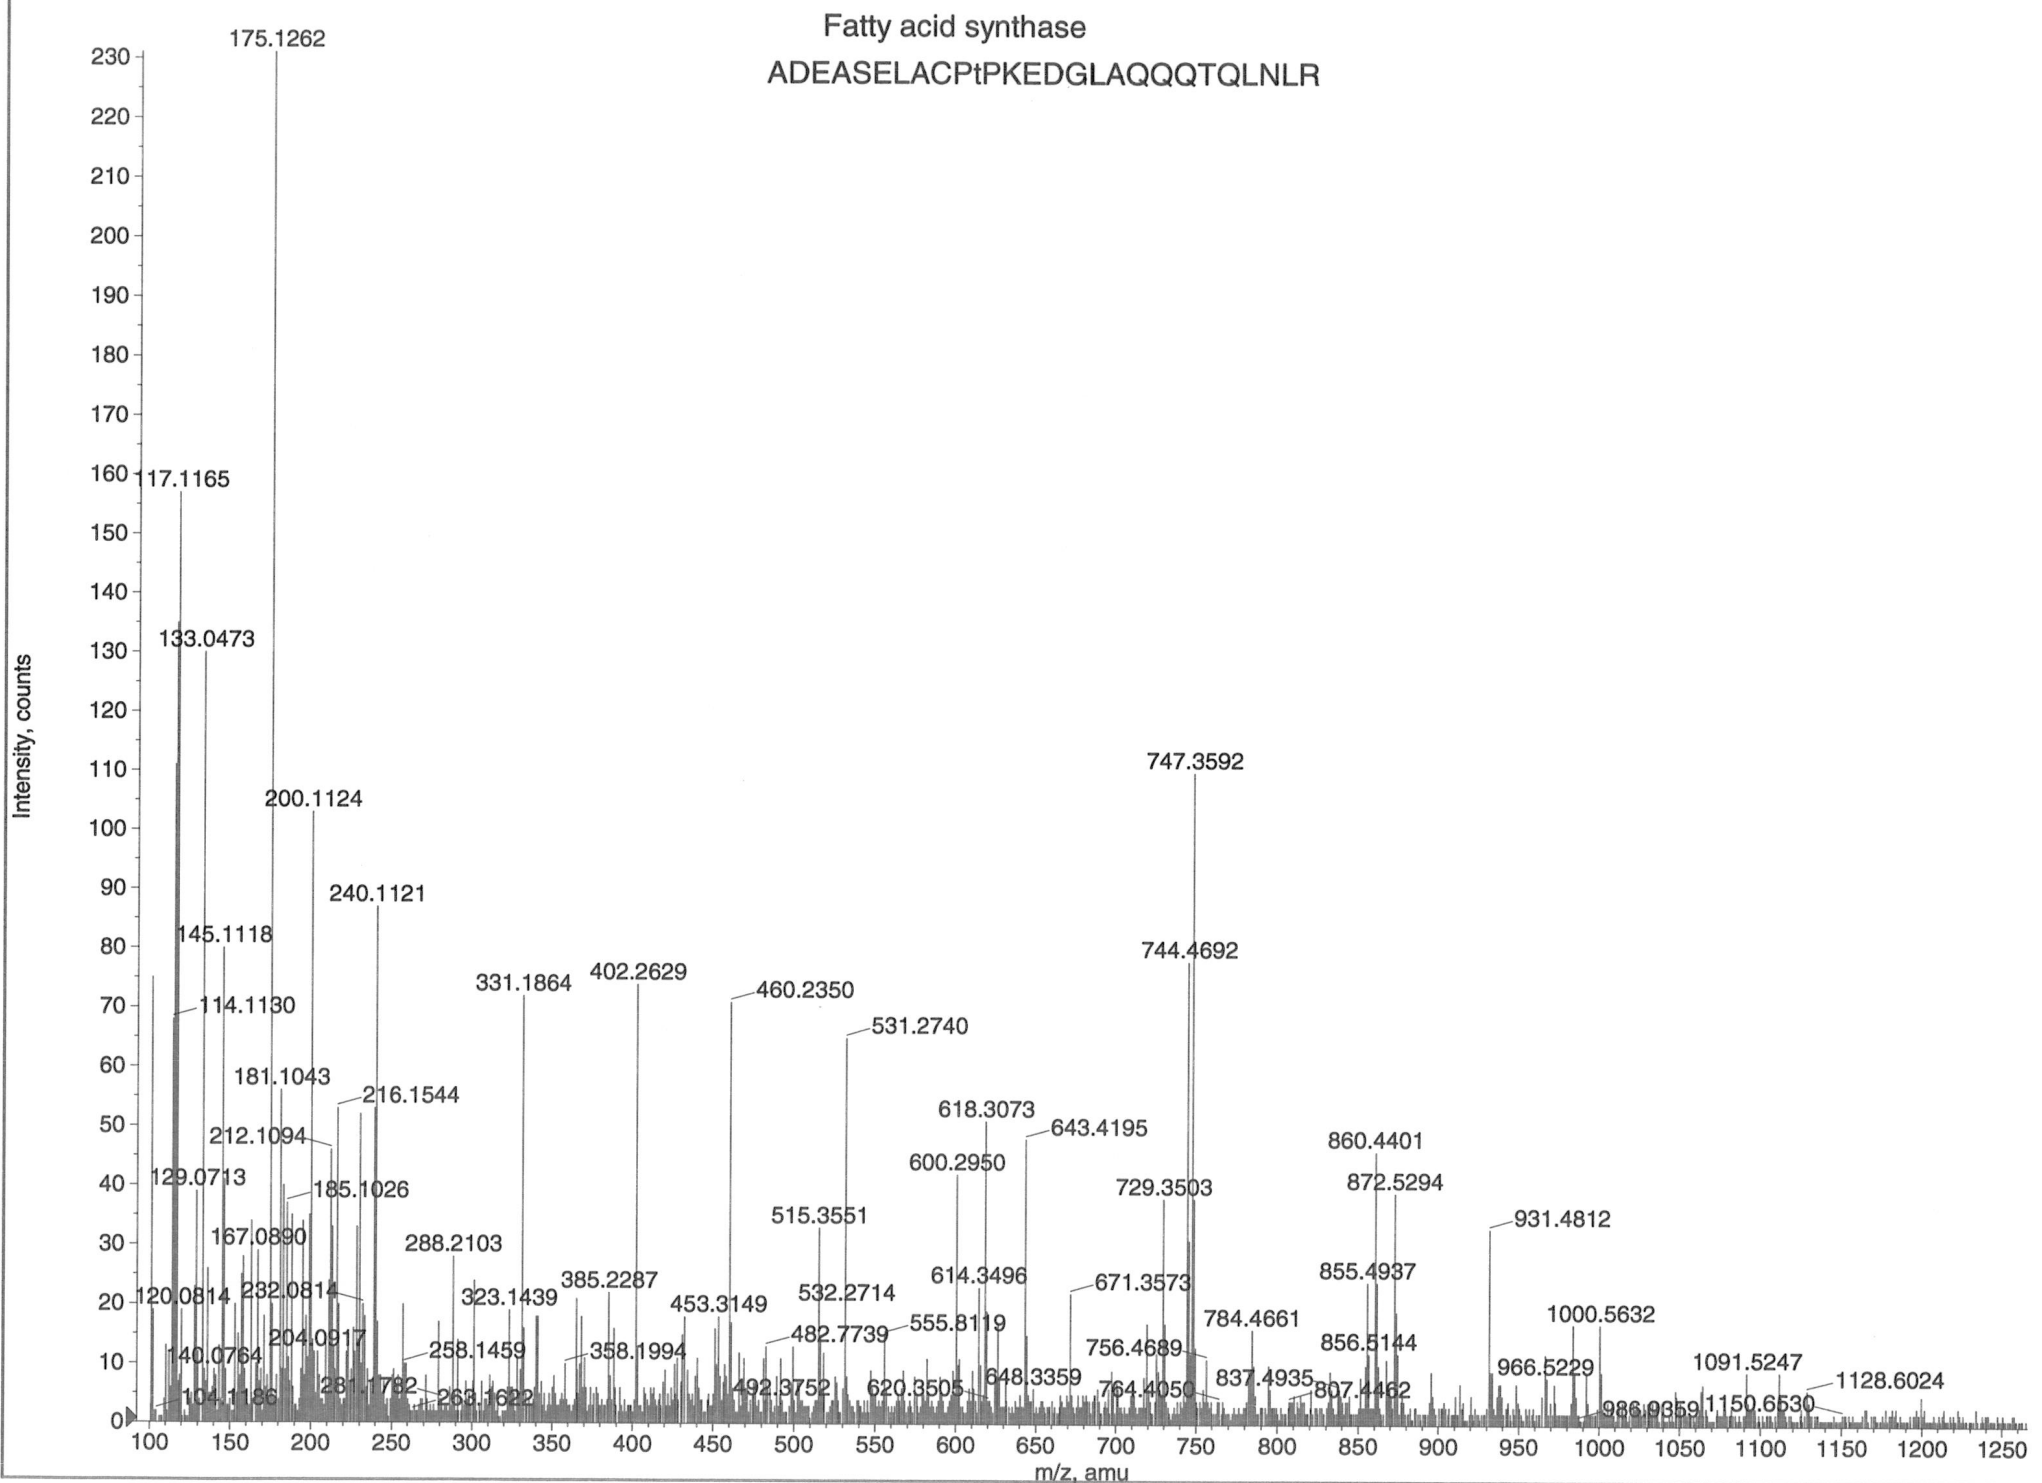

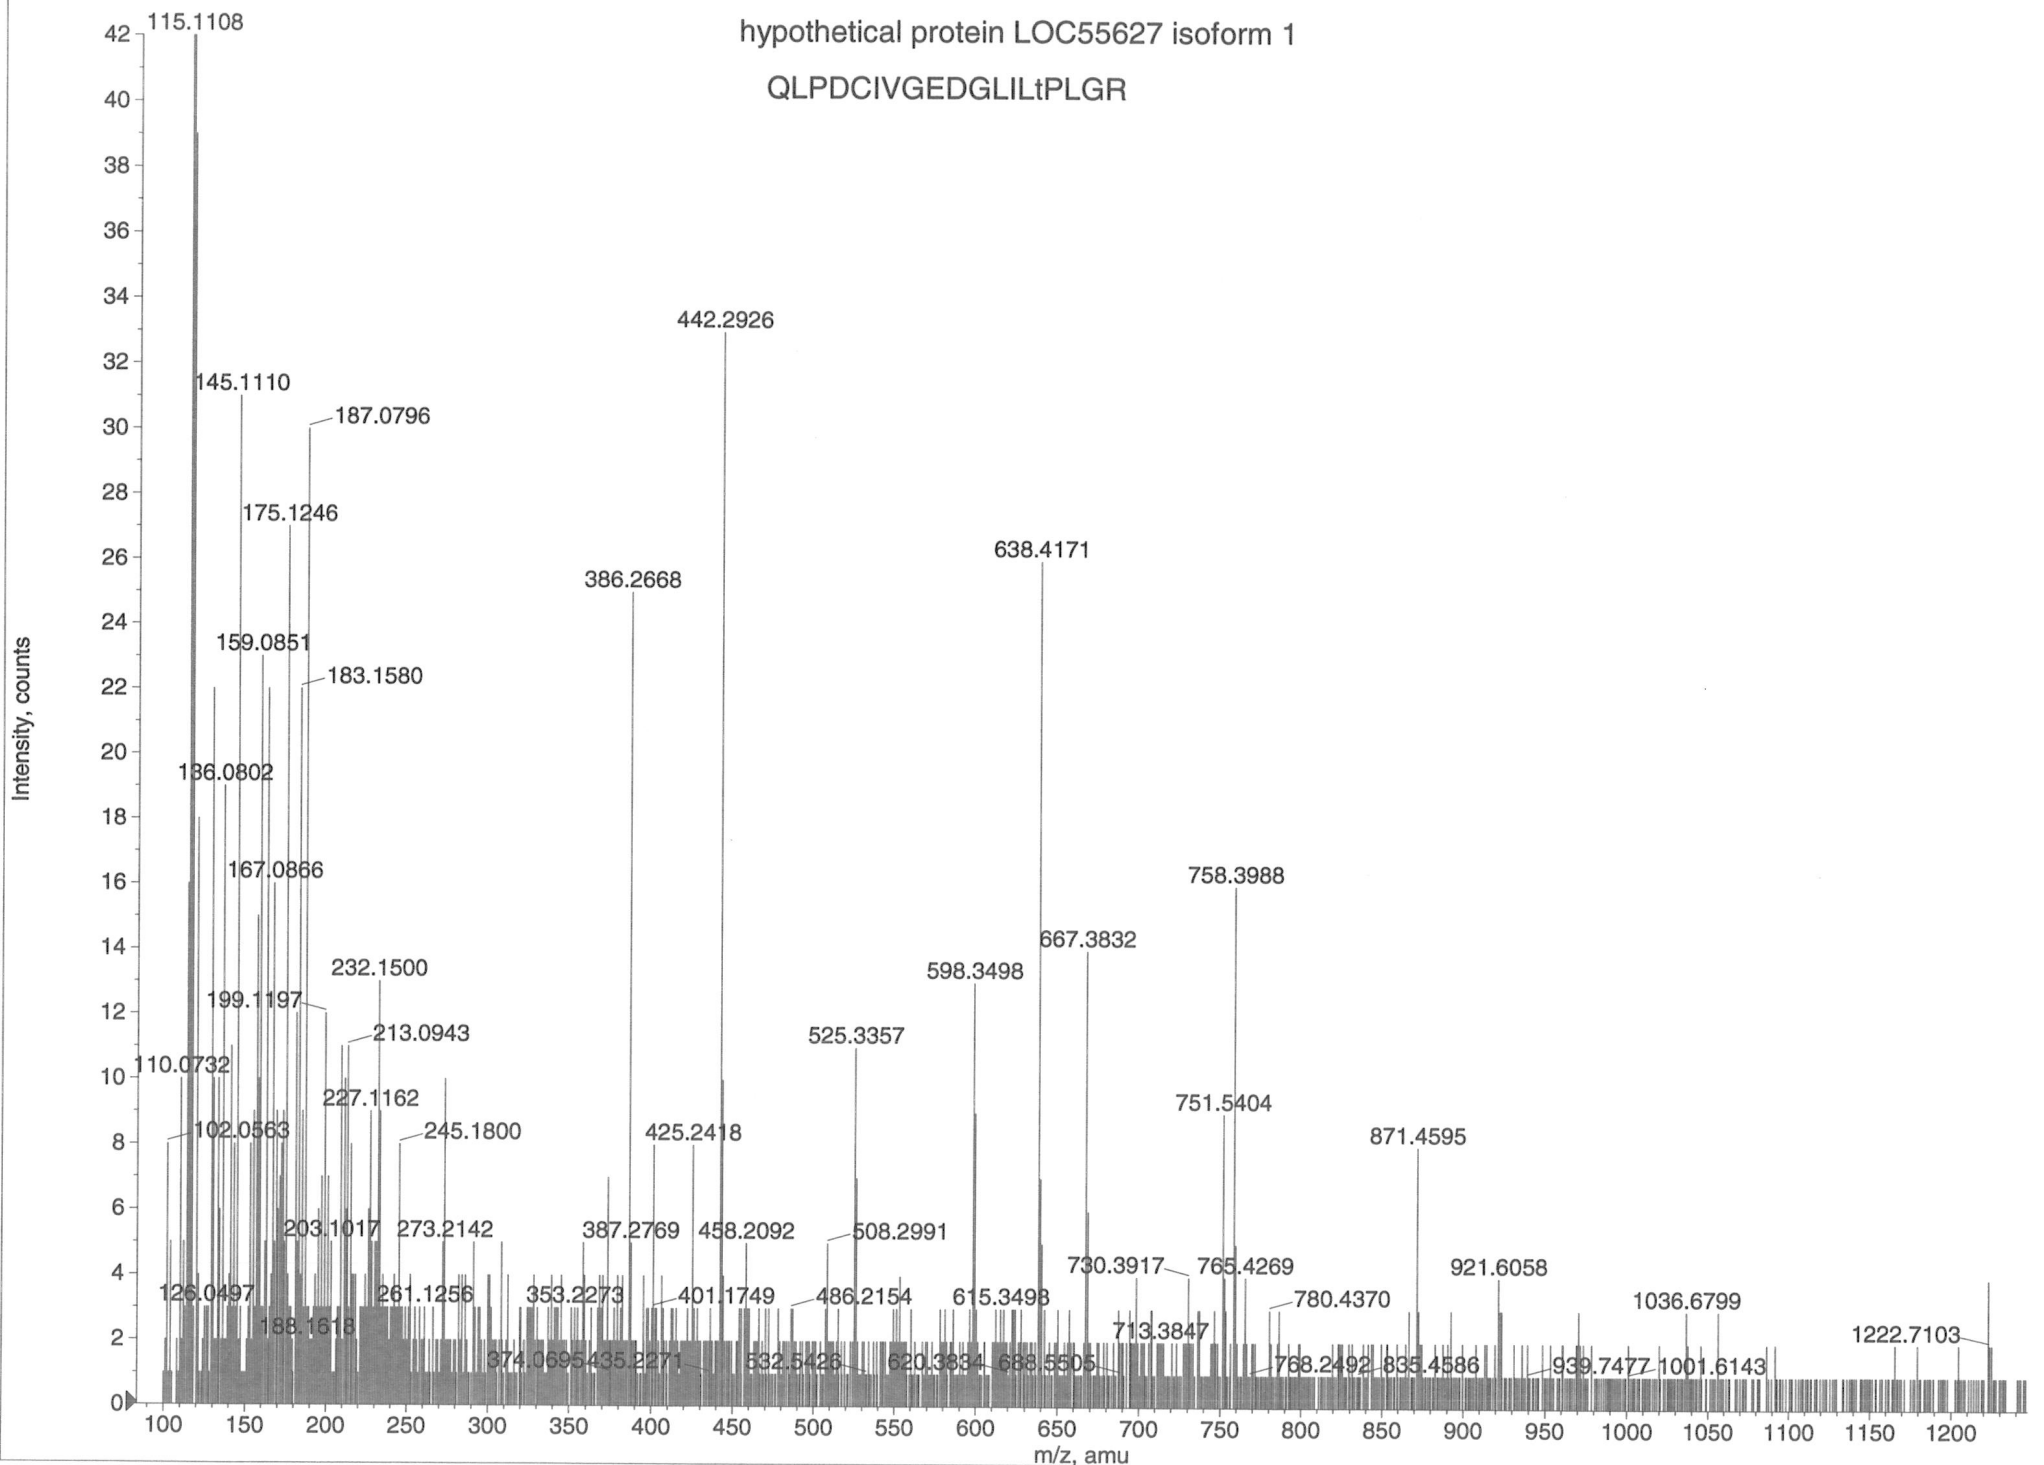

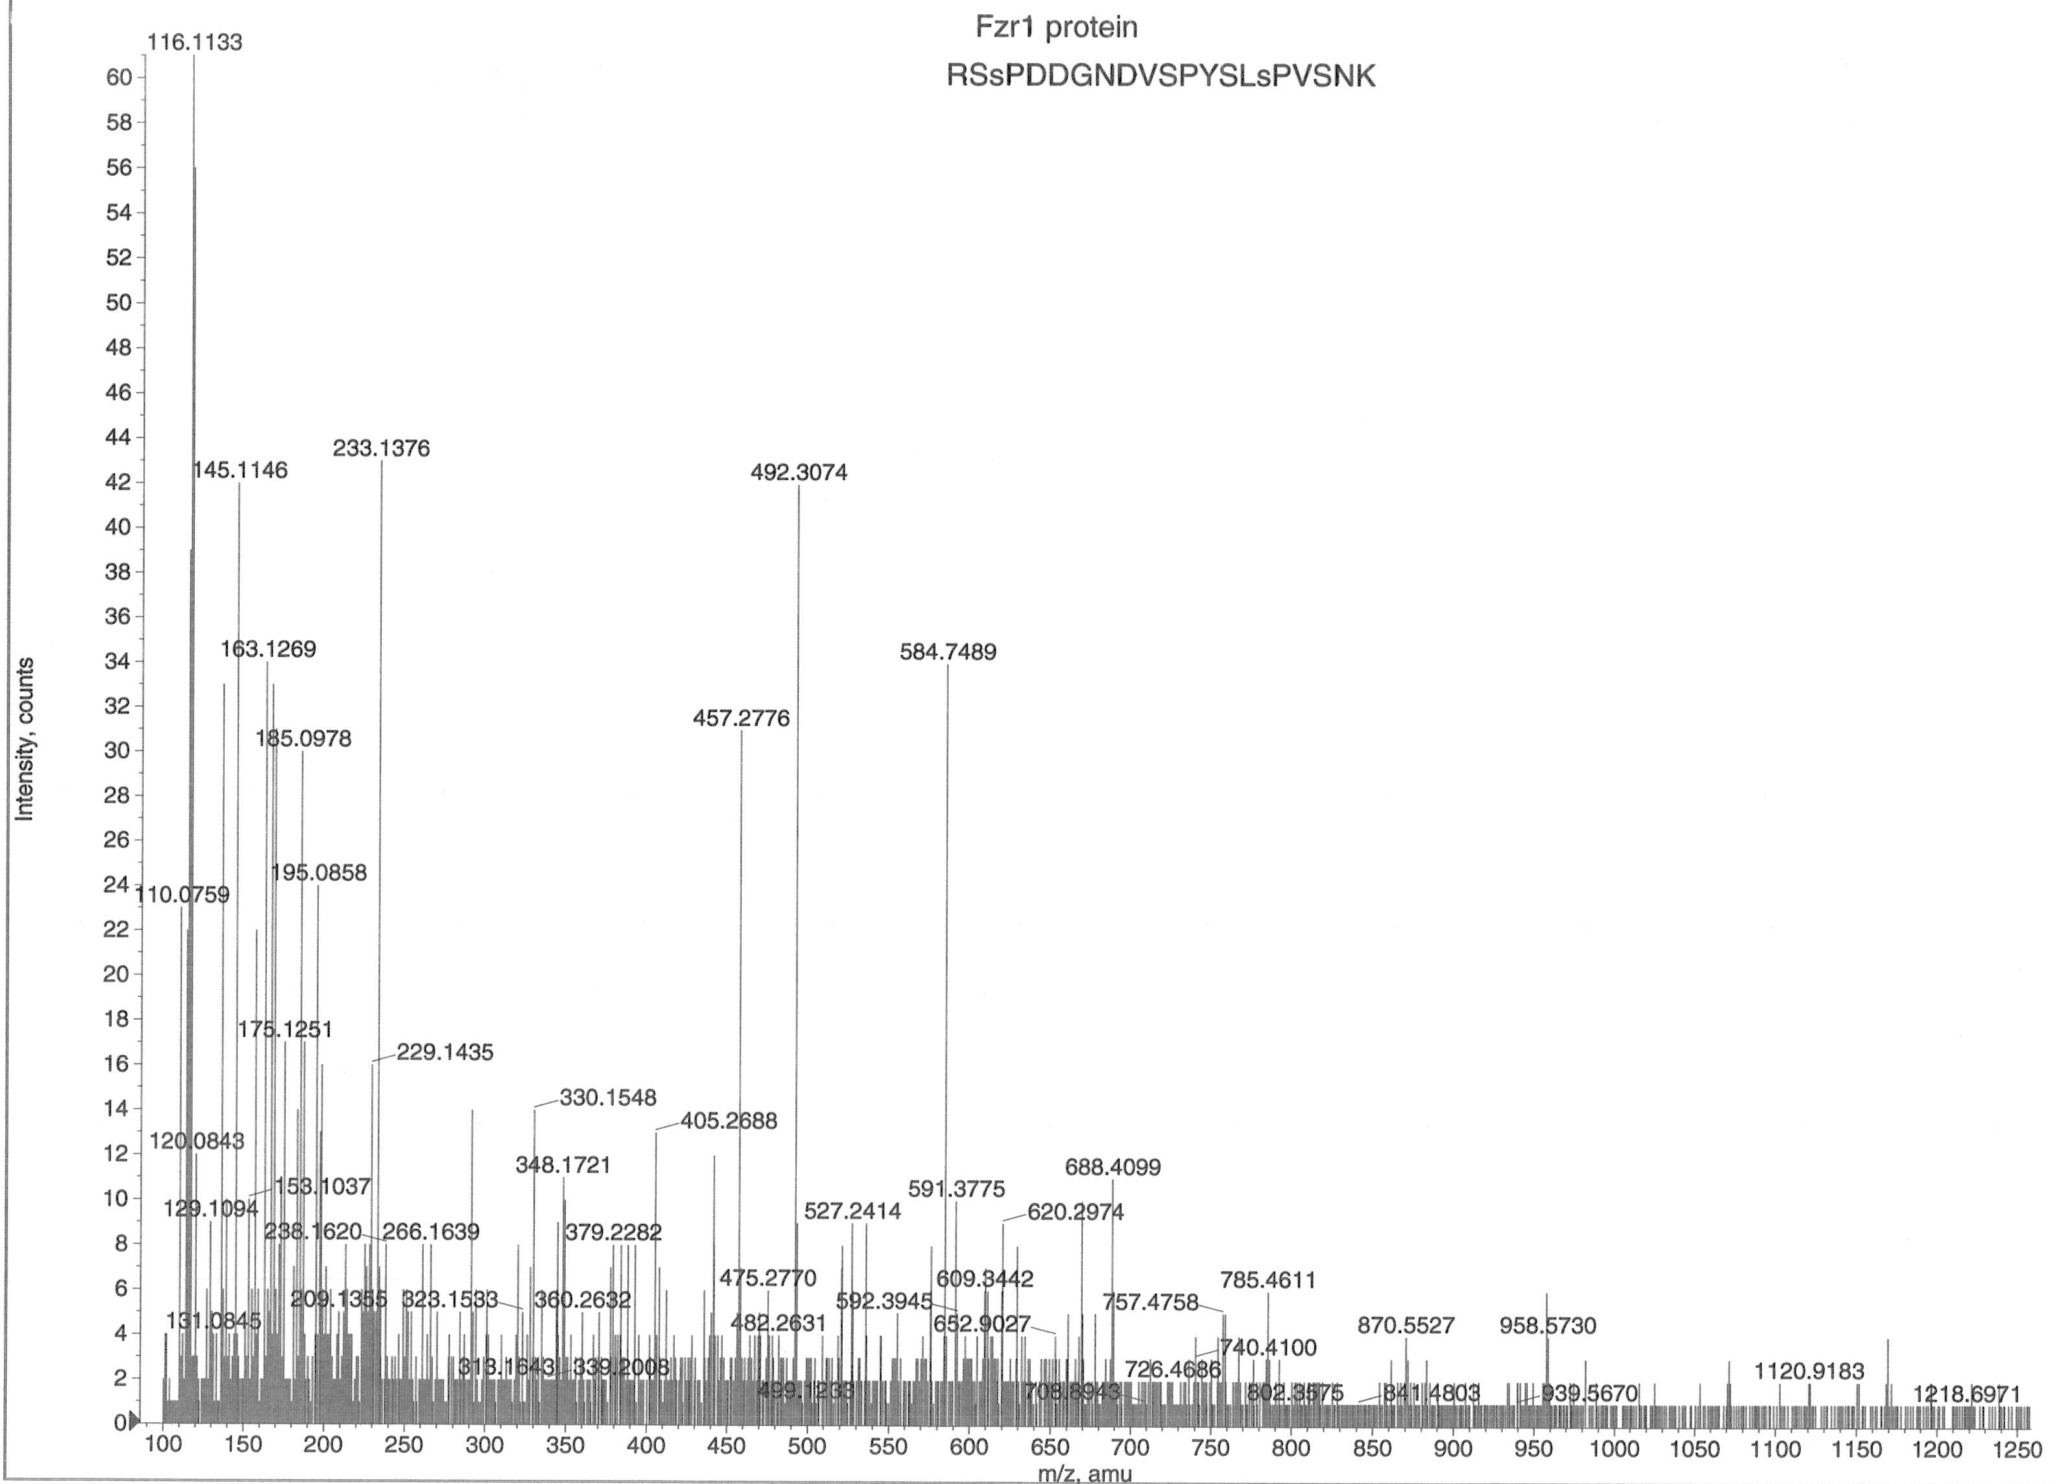

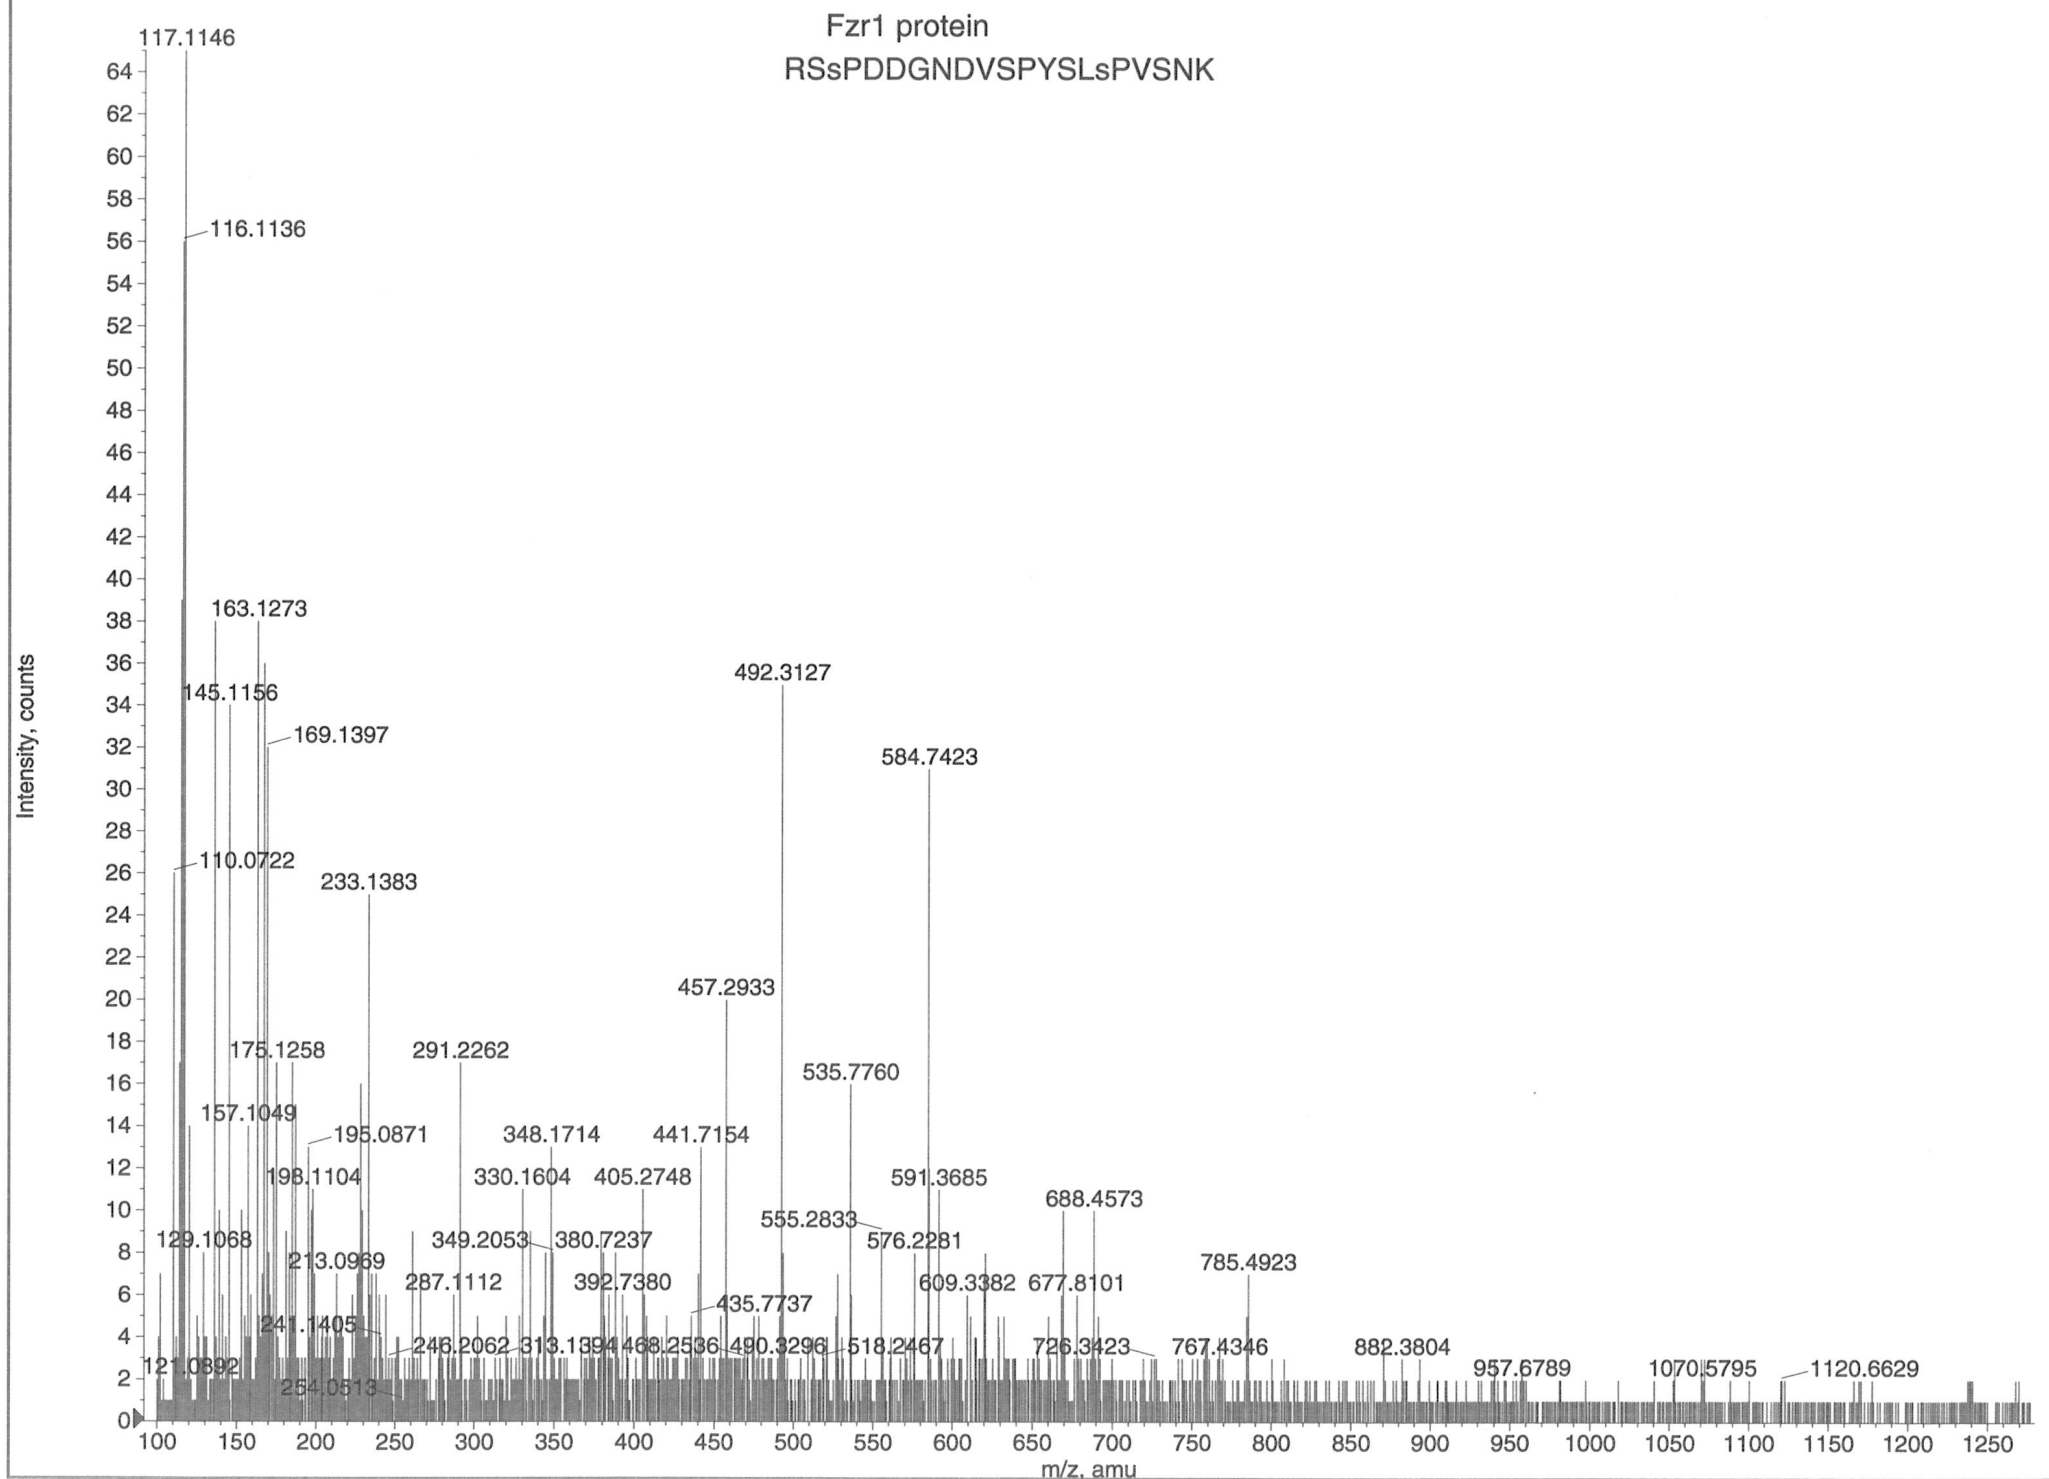



Fzr1 protein  
SSPDDGNDVSPYSLsPVS NK

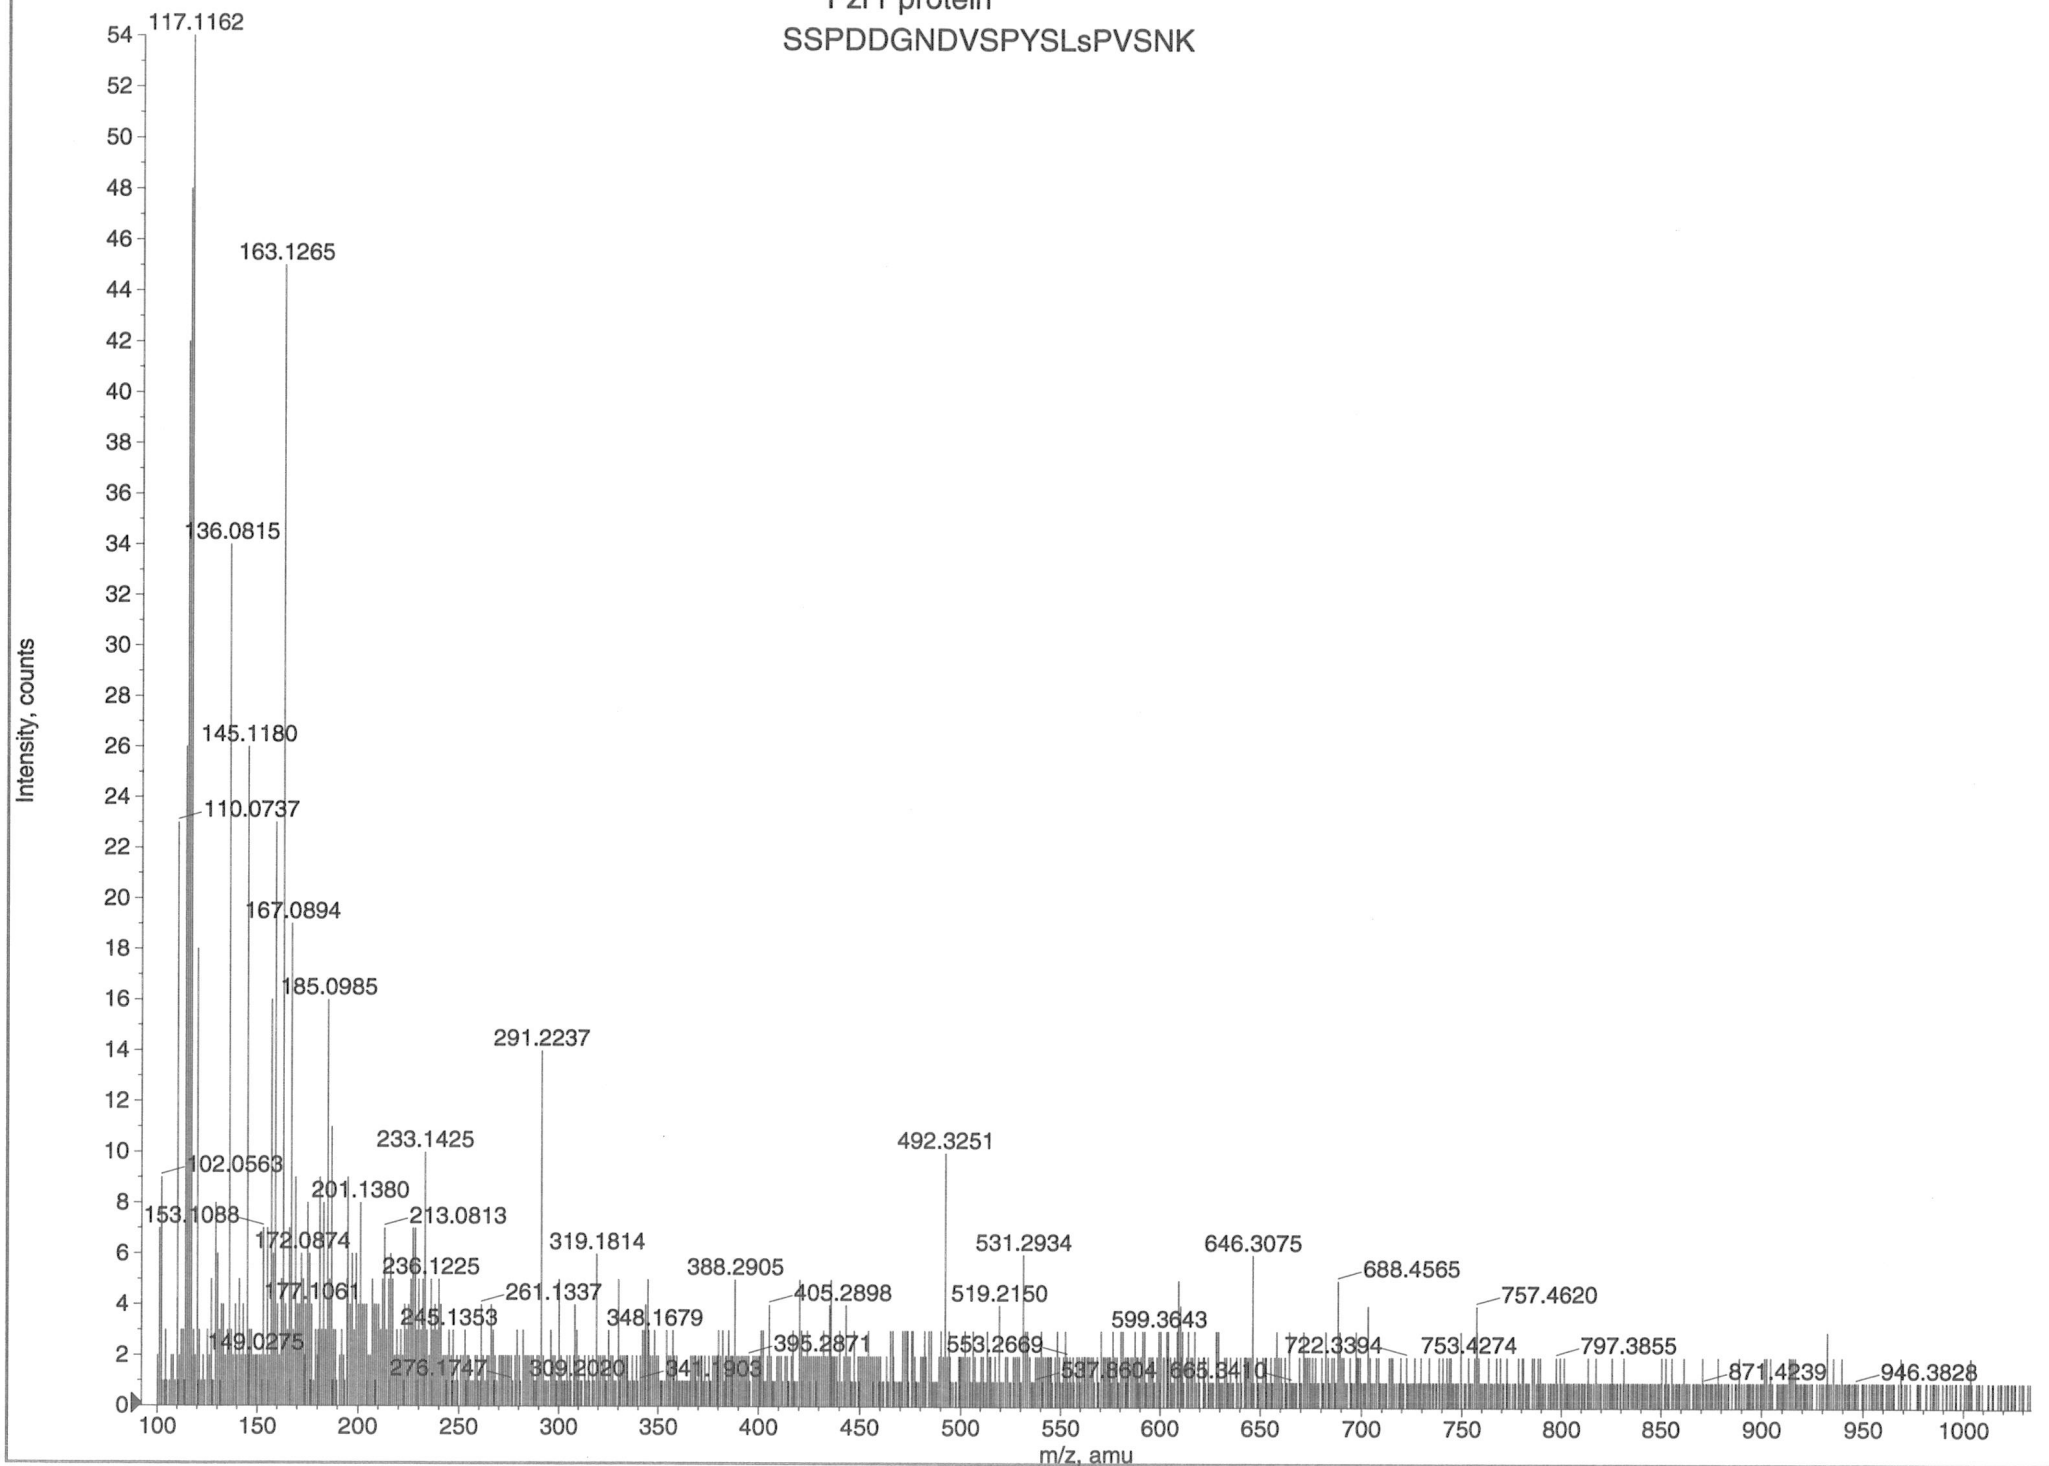

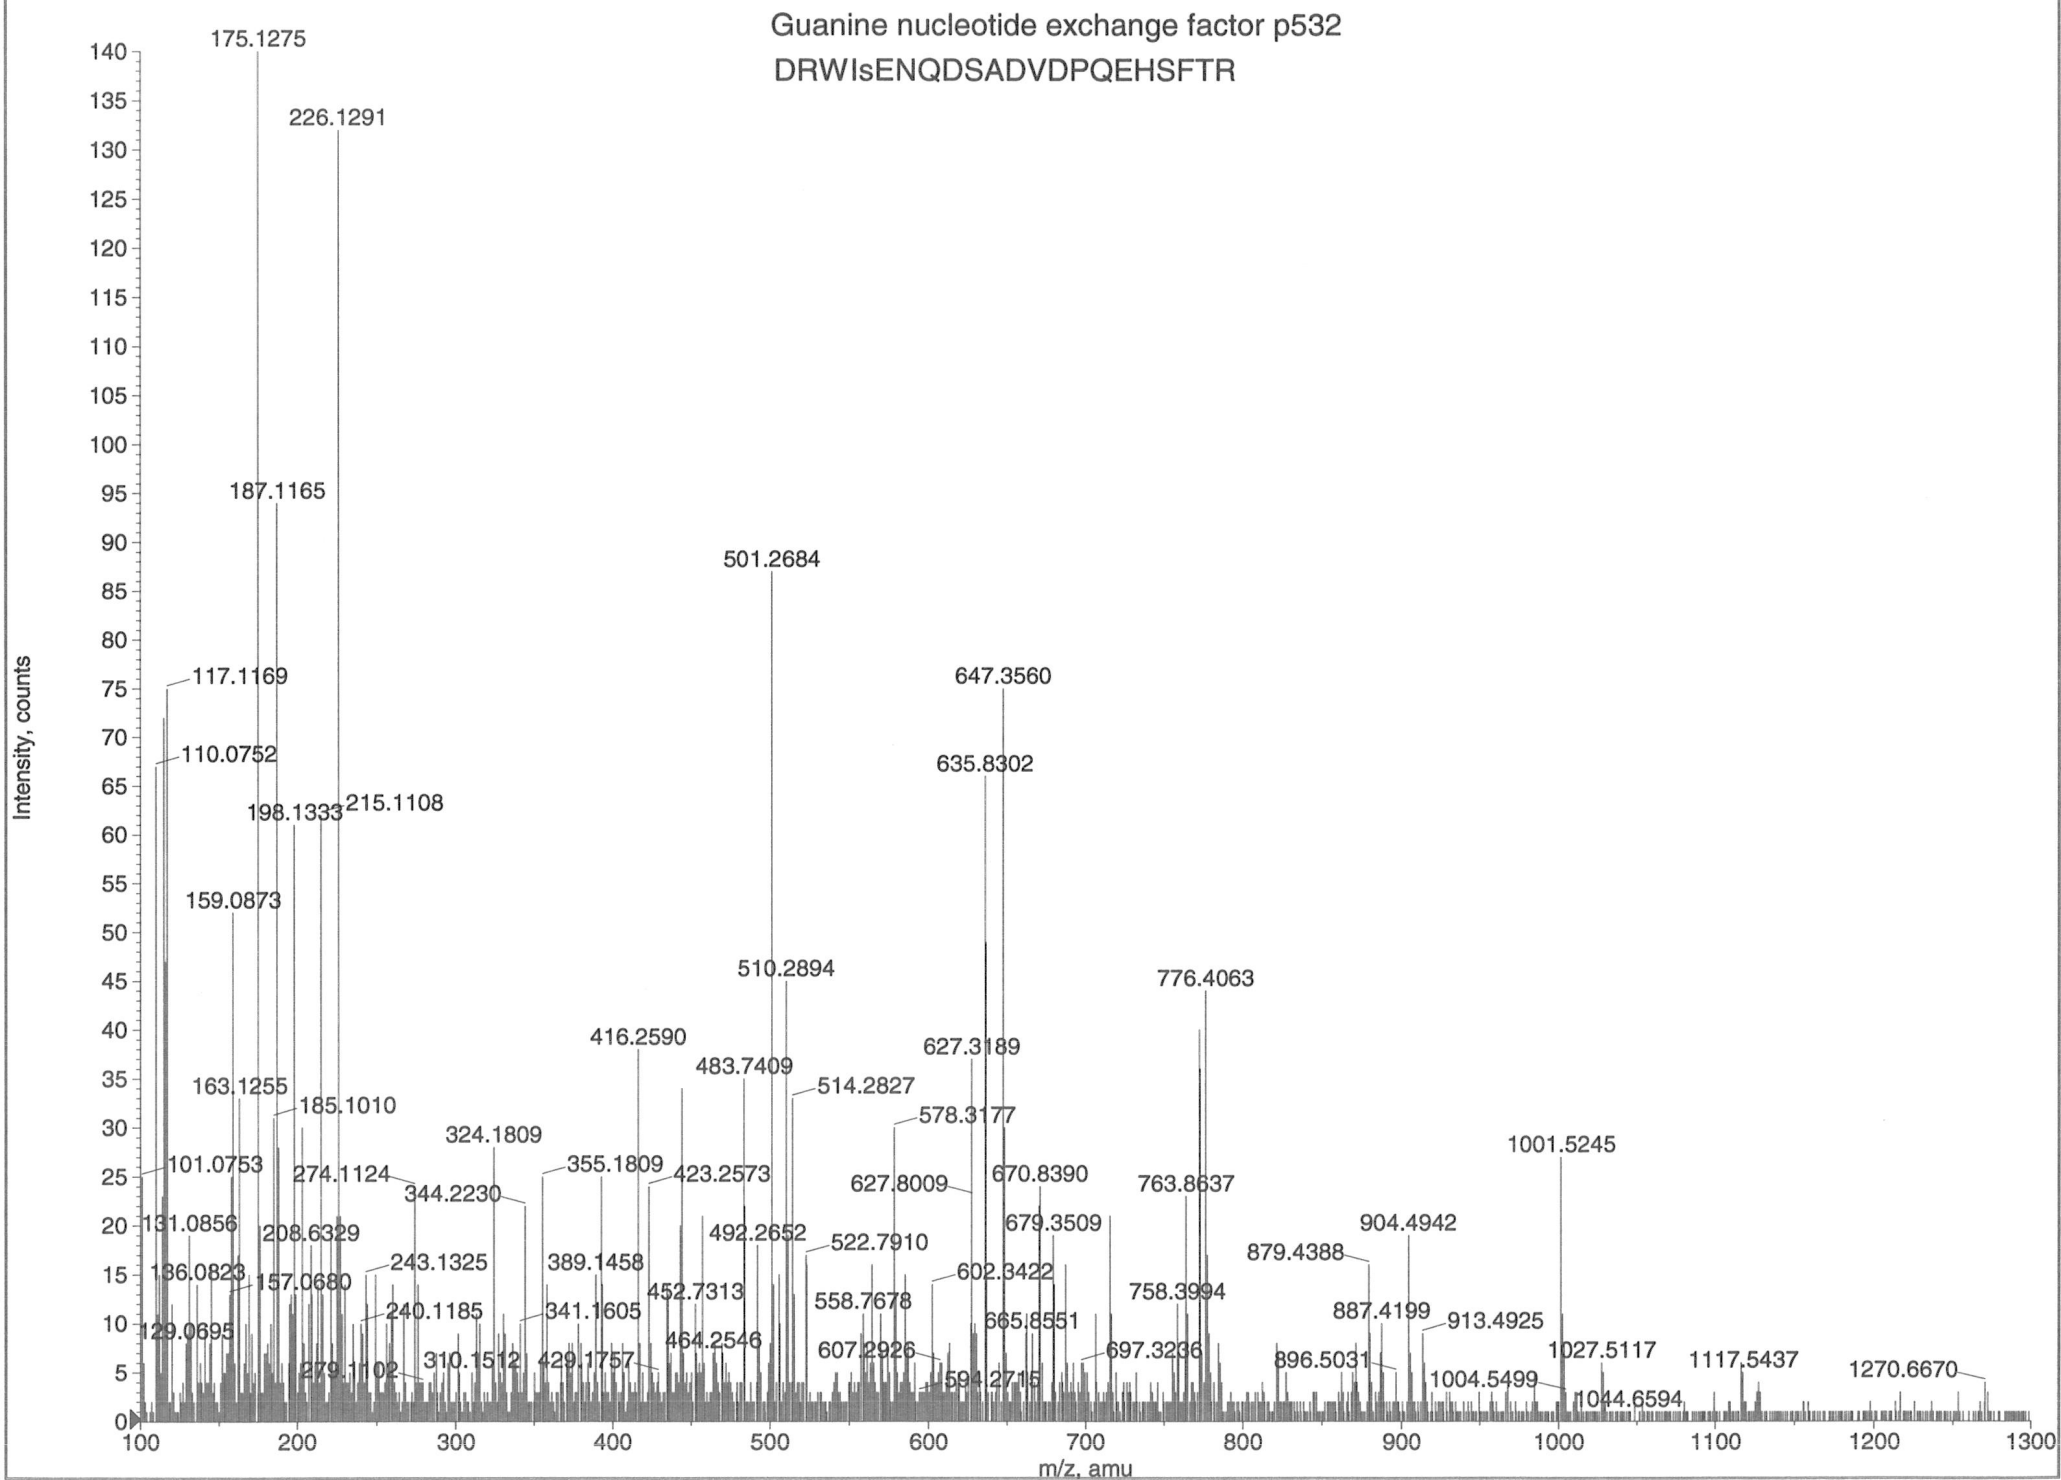

Heterogeneous nuclear ribonucleoprotein F  
ATENDIYNFFsPLNPVR

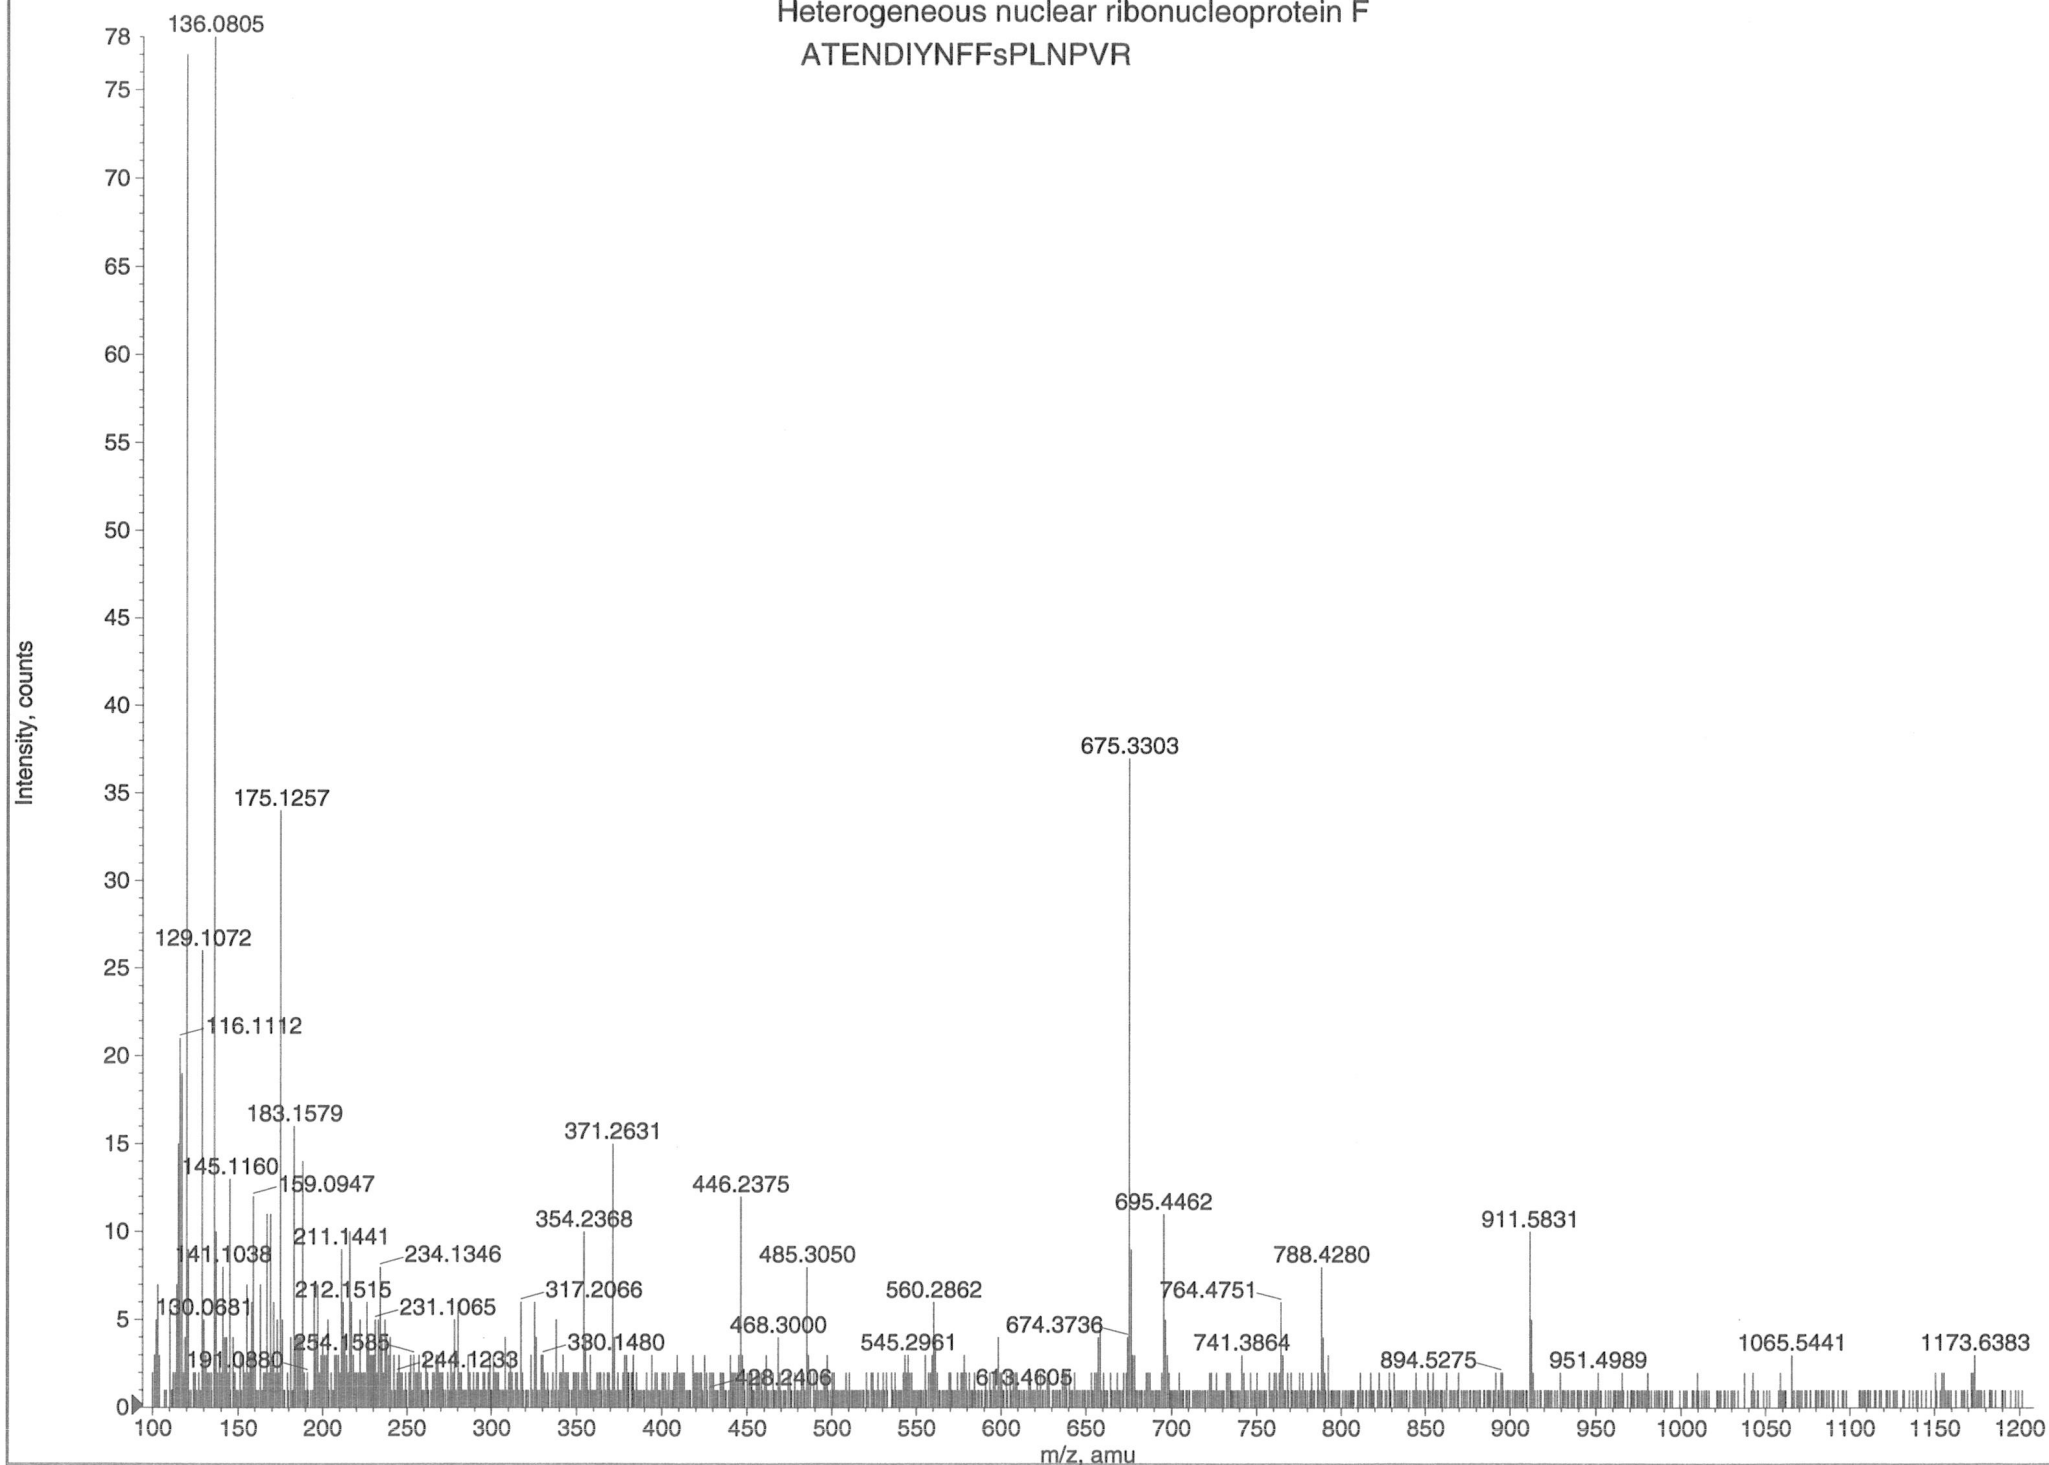

Heterogeneous nuclear ribonucleoprotein F  
ATENDIYNFFsPLNPVR

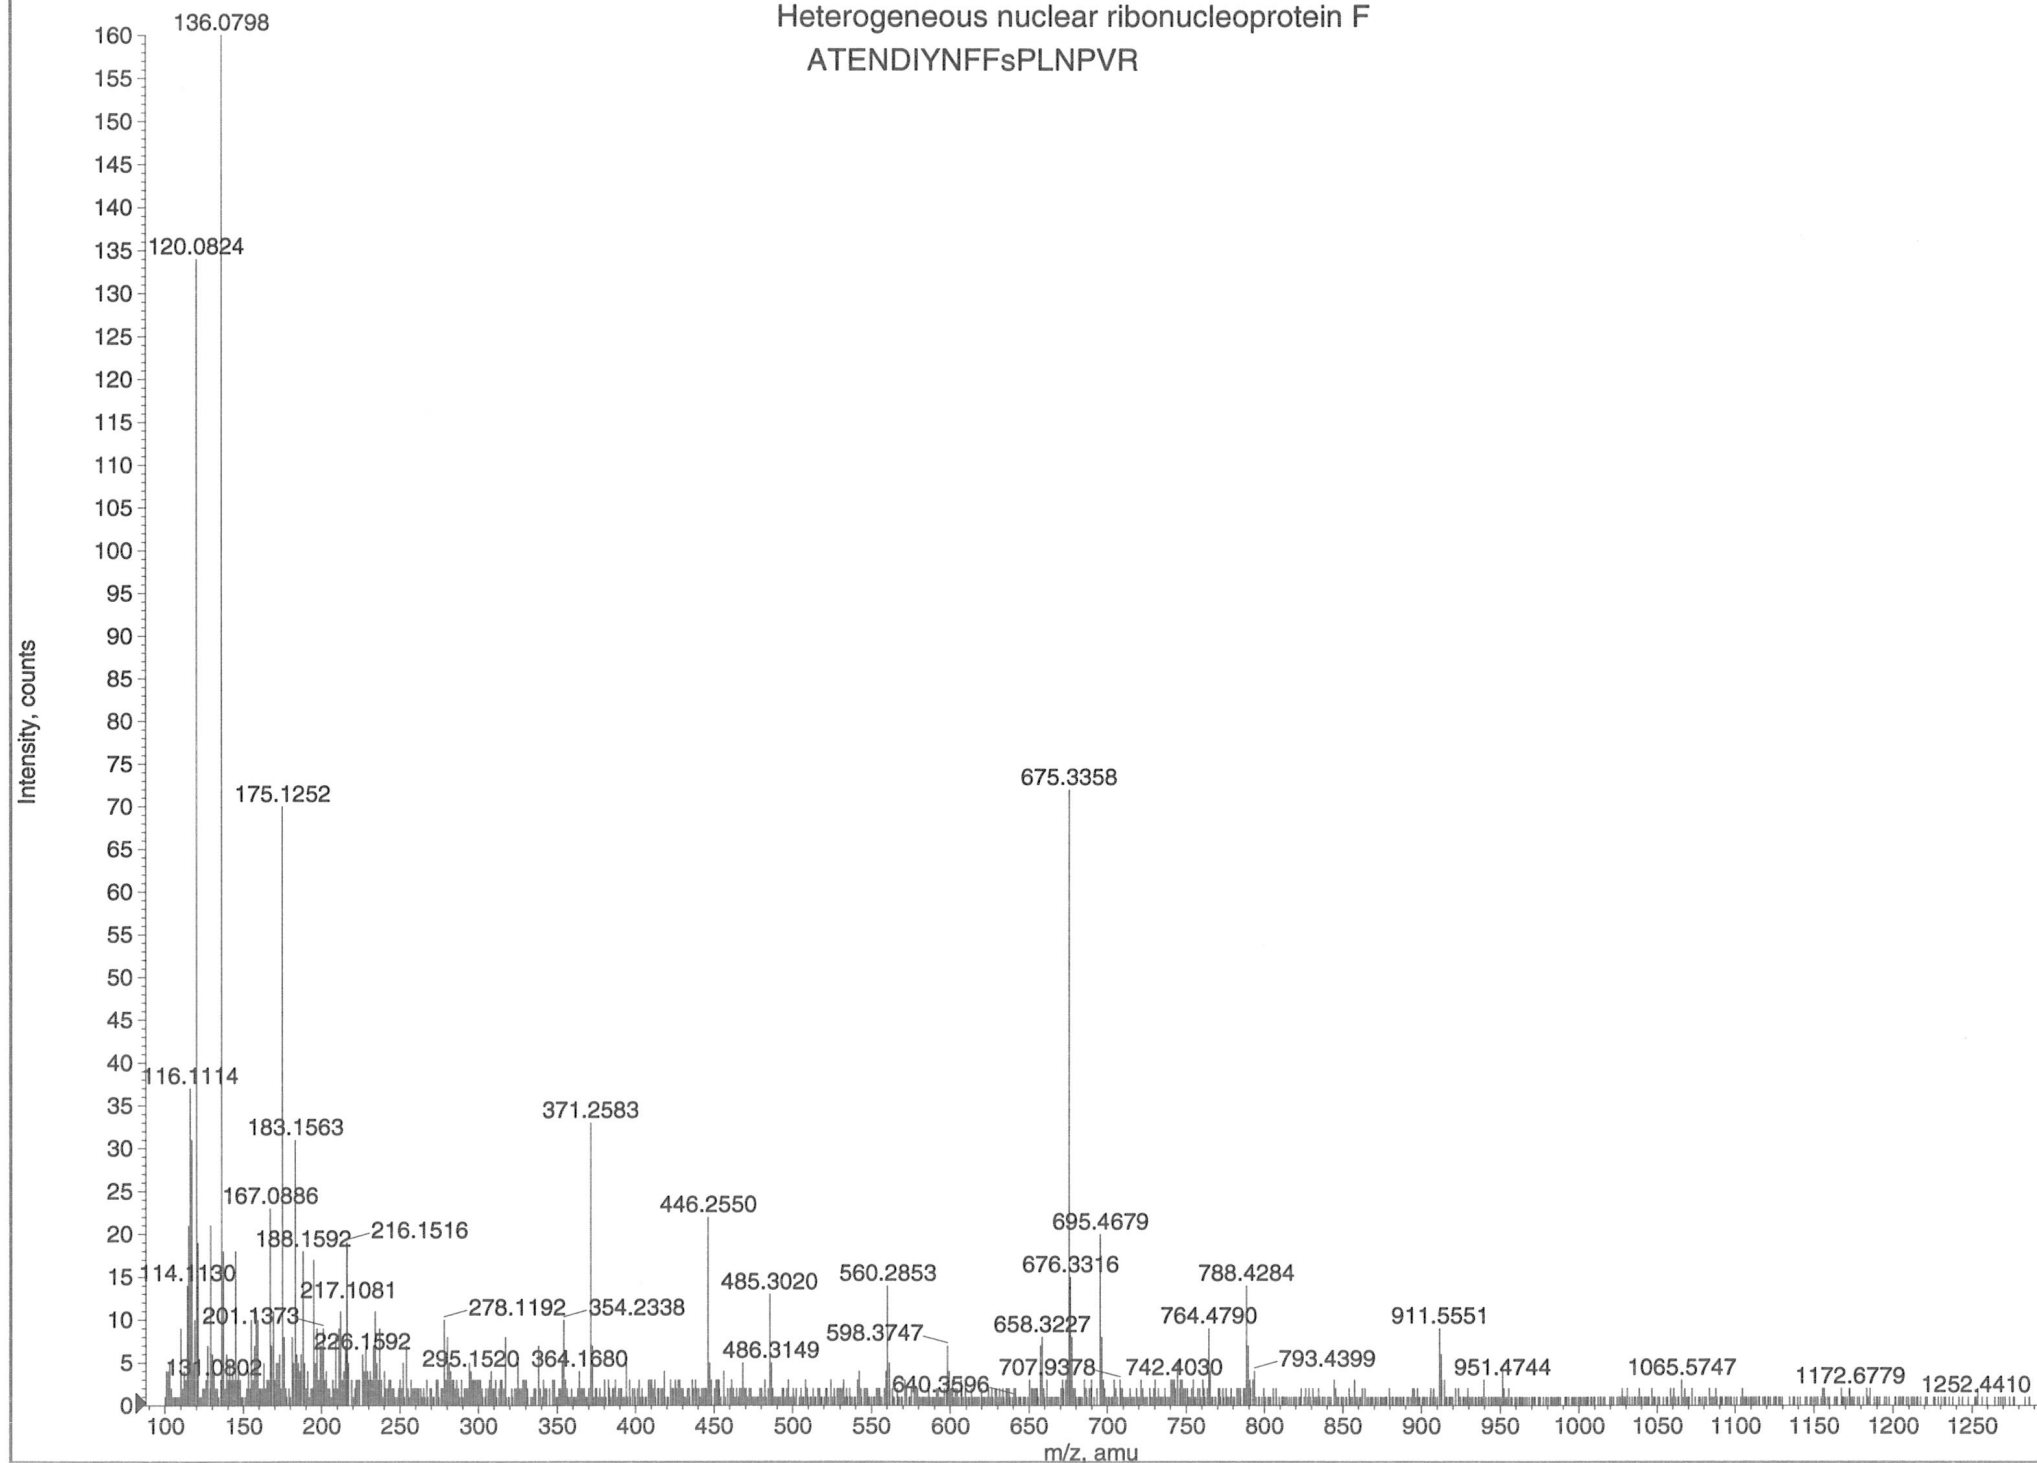

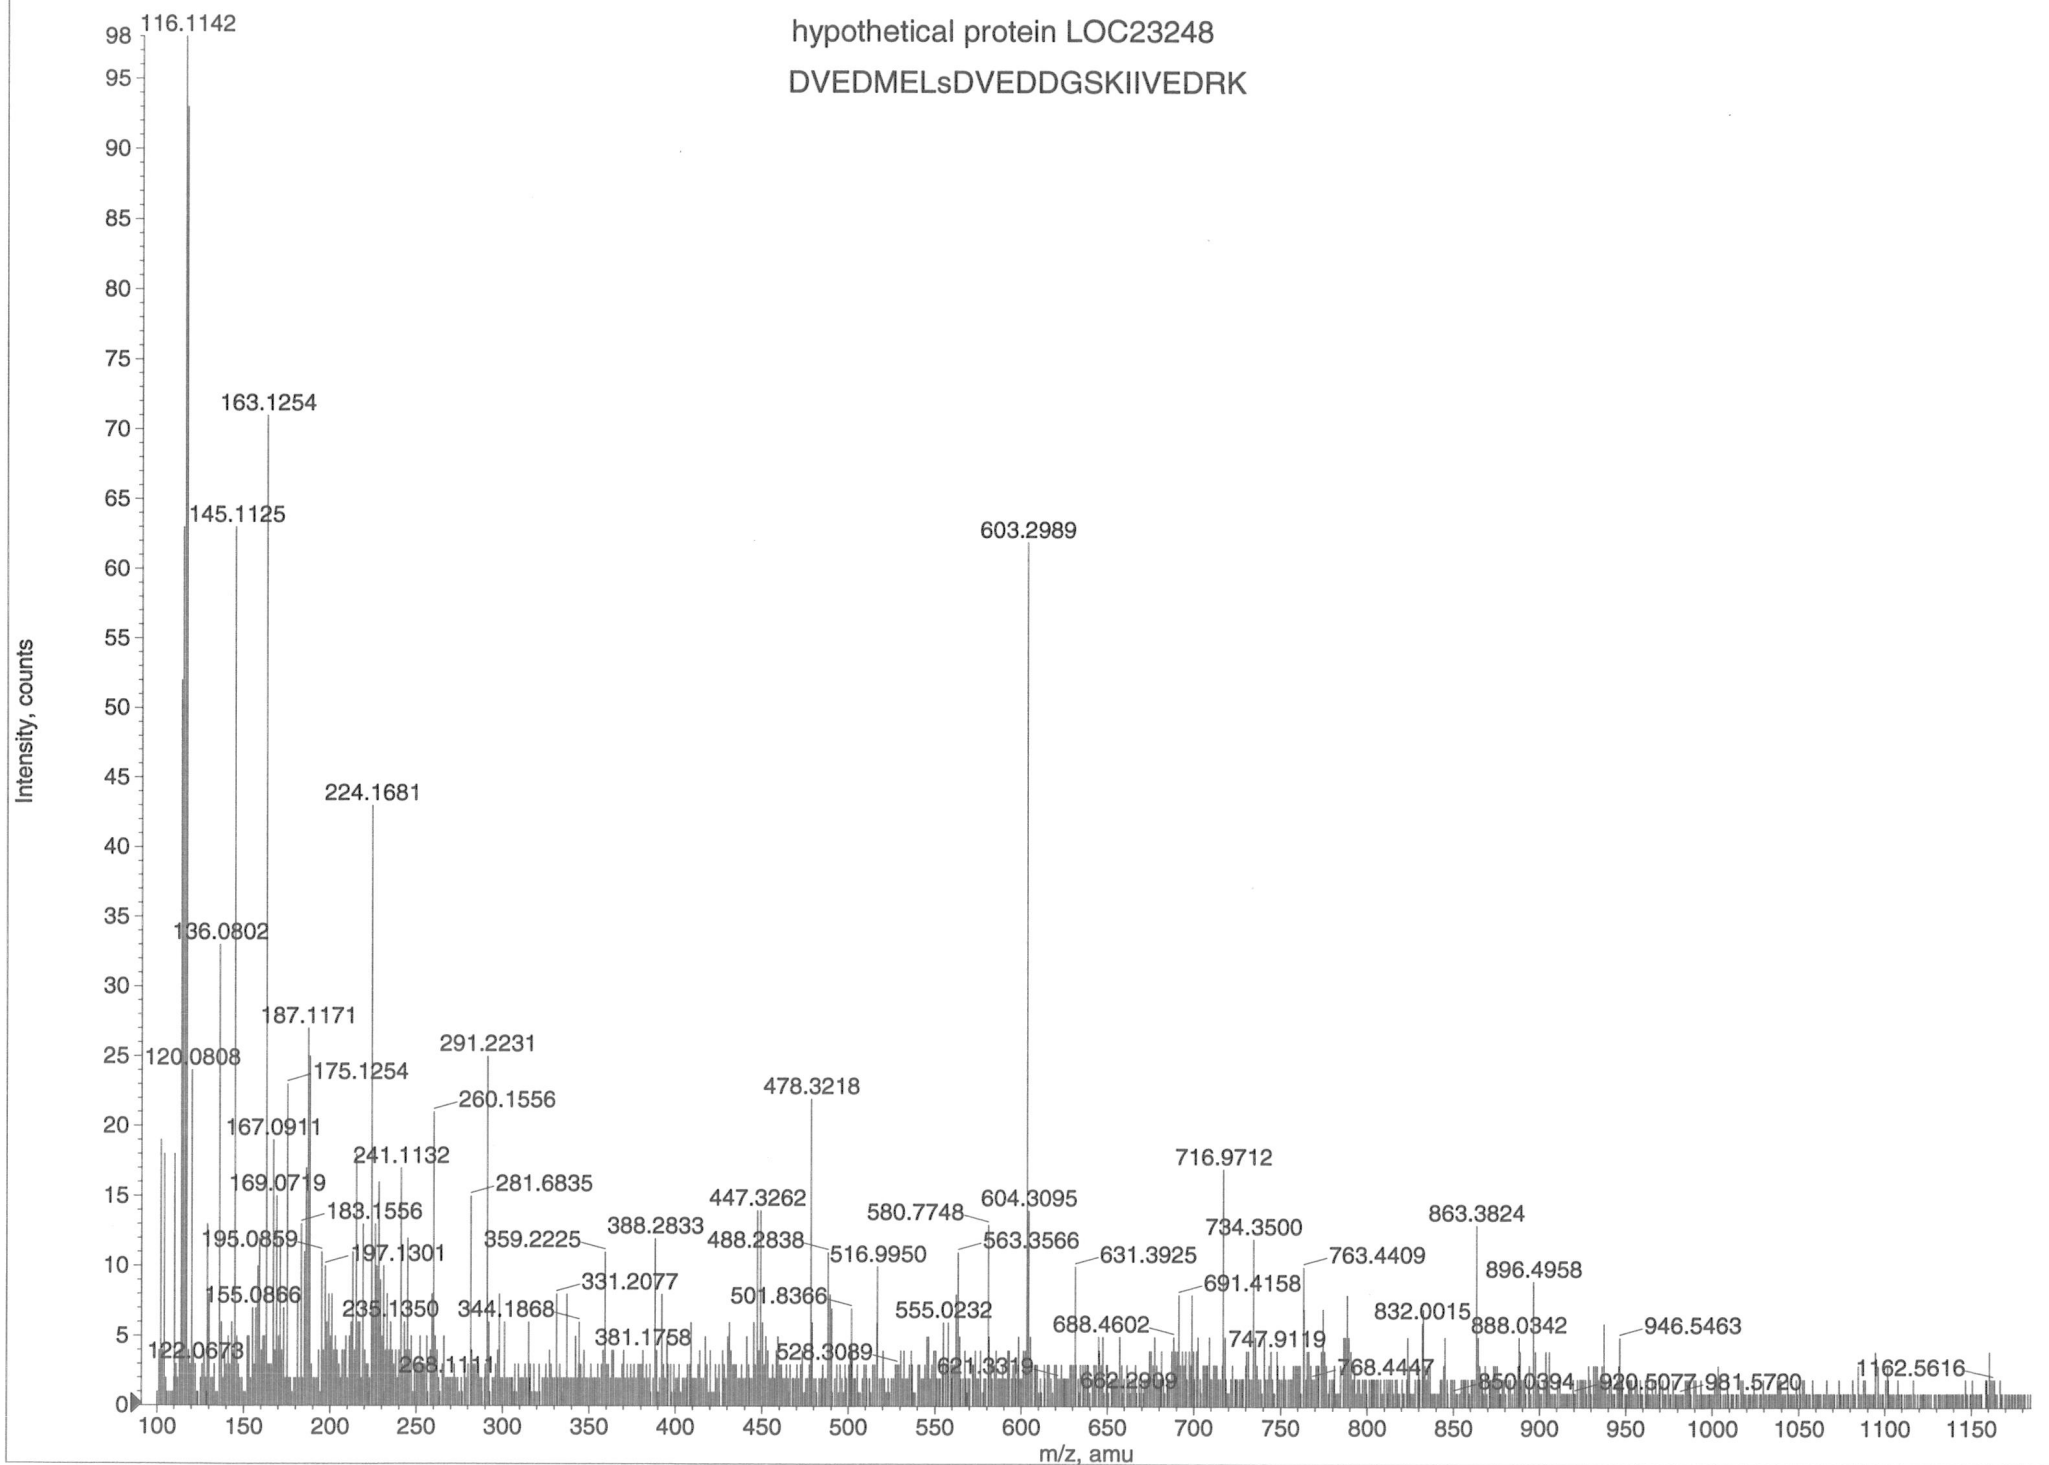

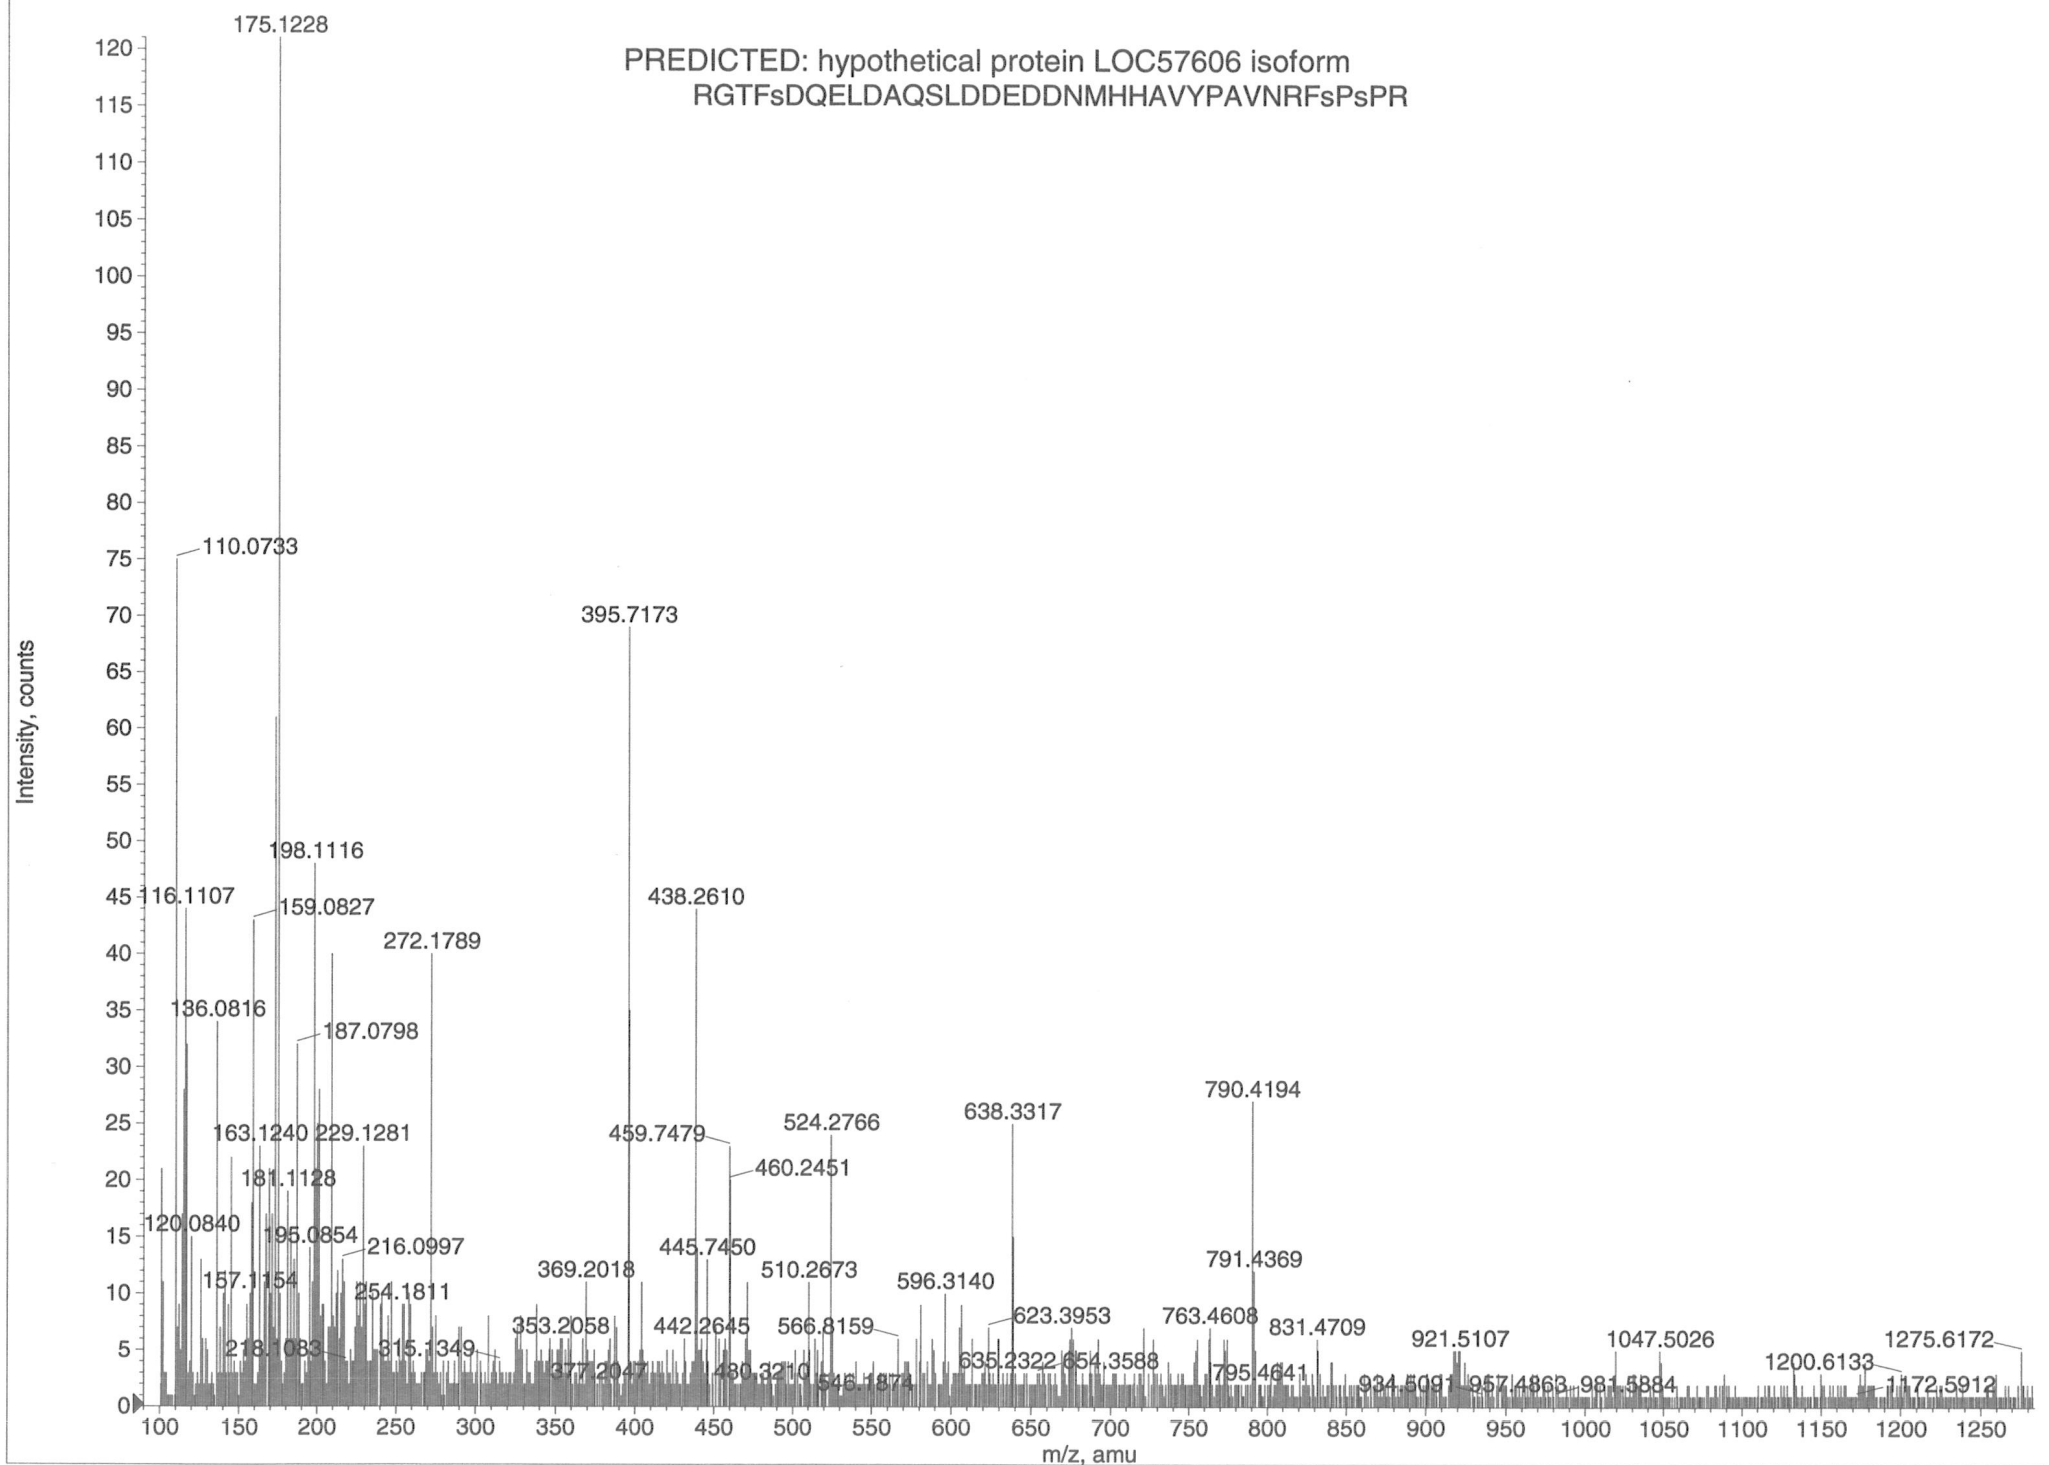

PREDICTED: similar to 40S ribosomal protein S3

DEILPTtPISEQK

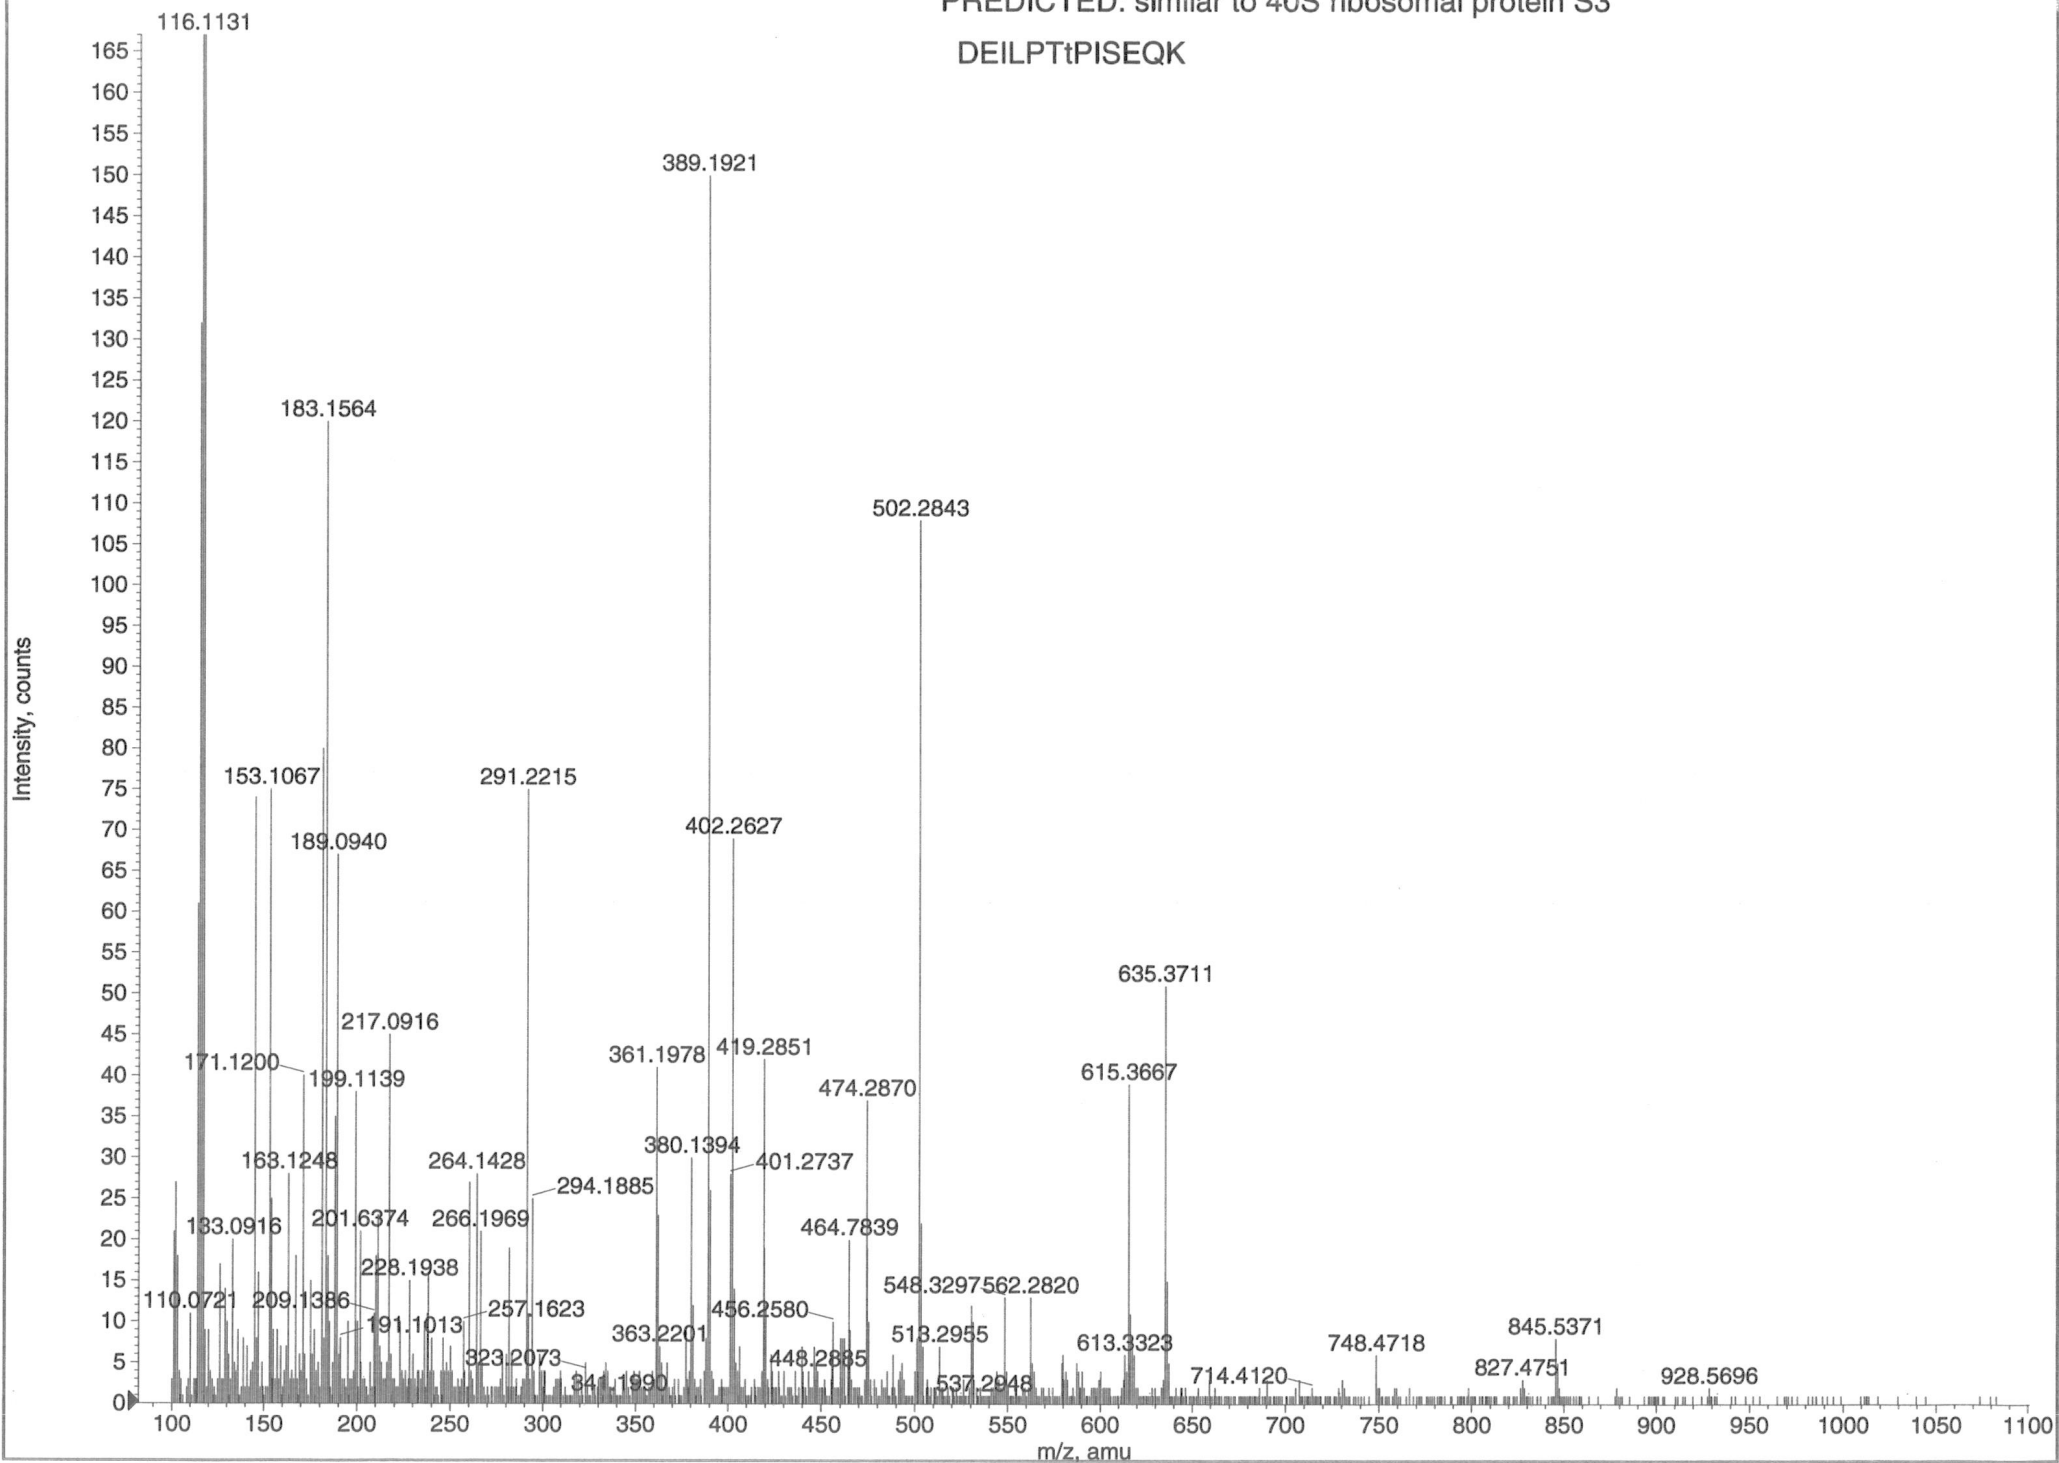

PREDICTED: similar to 40S ribosomal protein S3  
DEILPTpTPISEQK

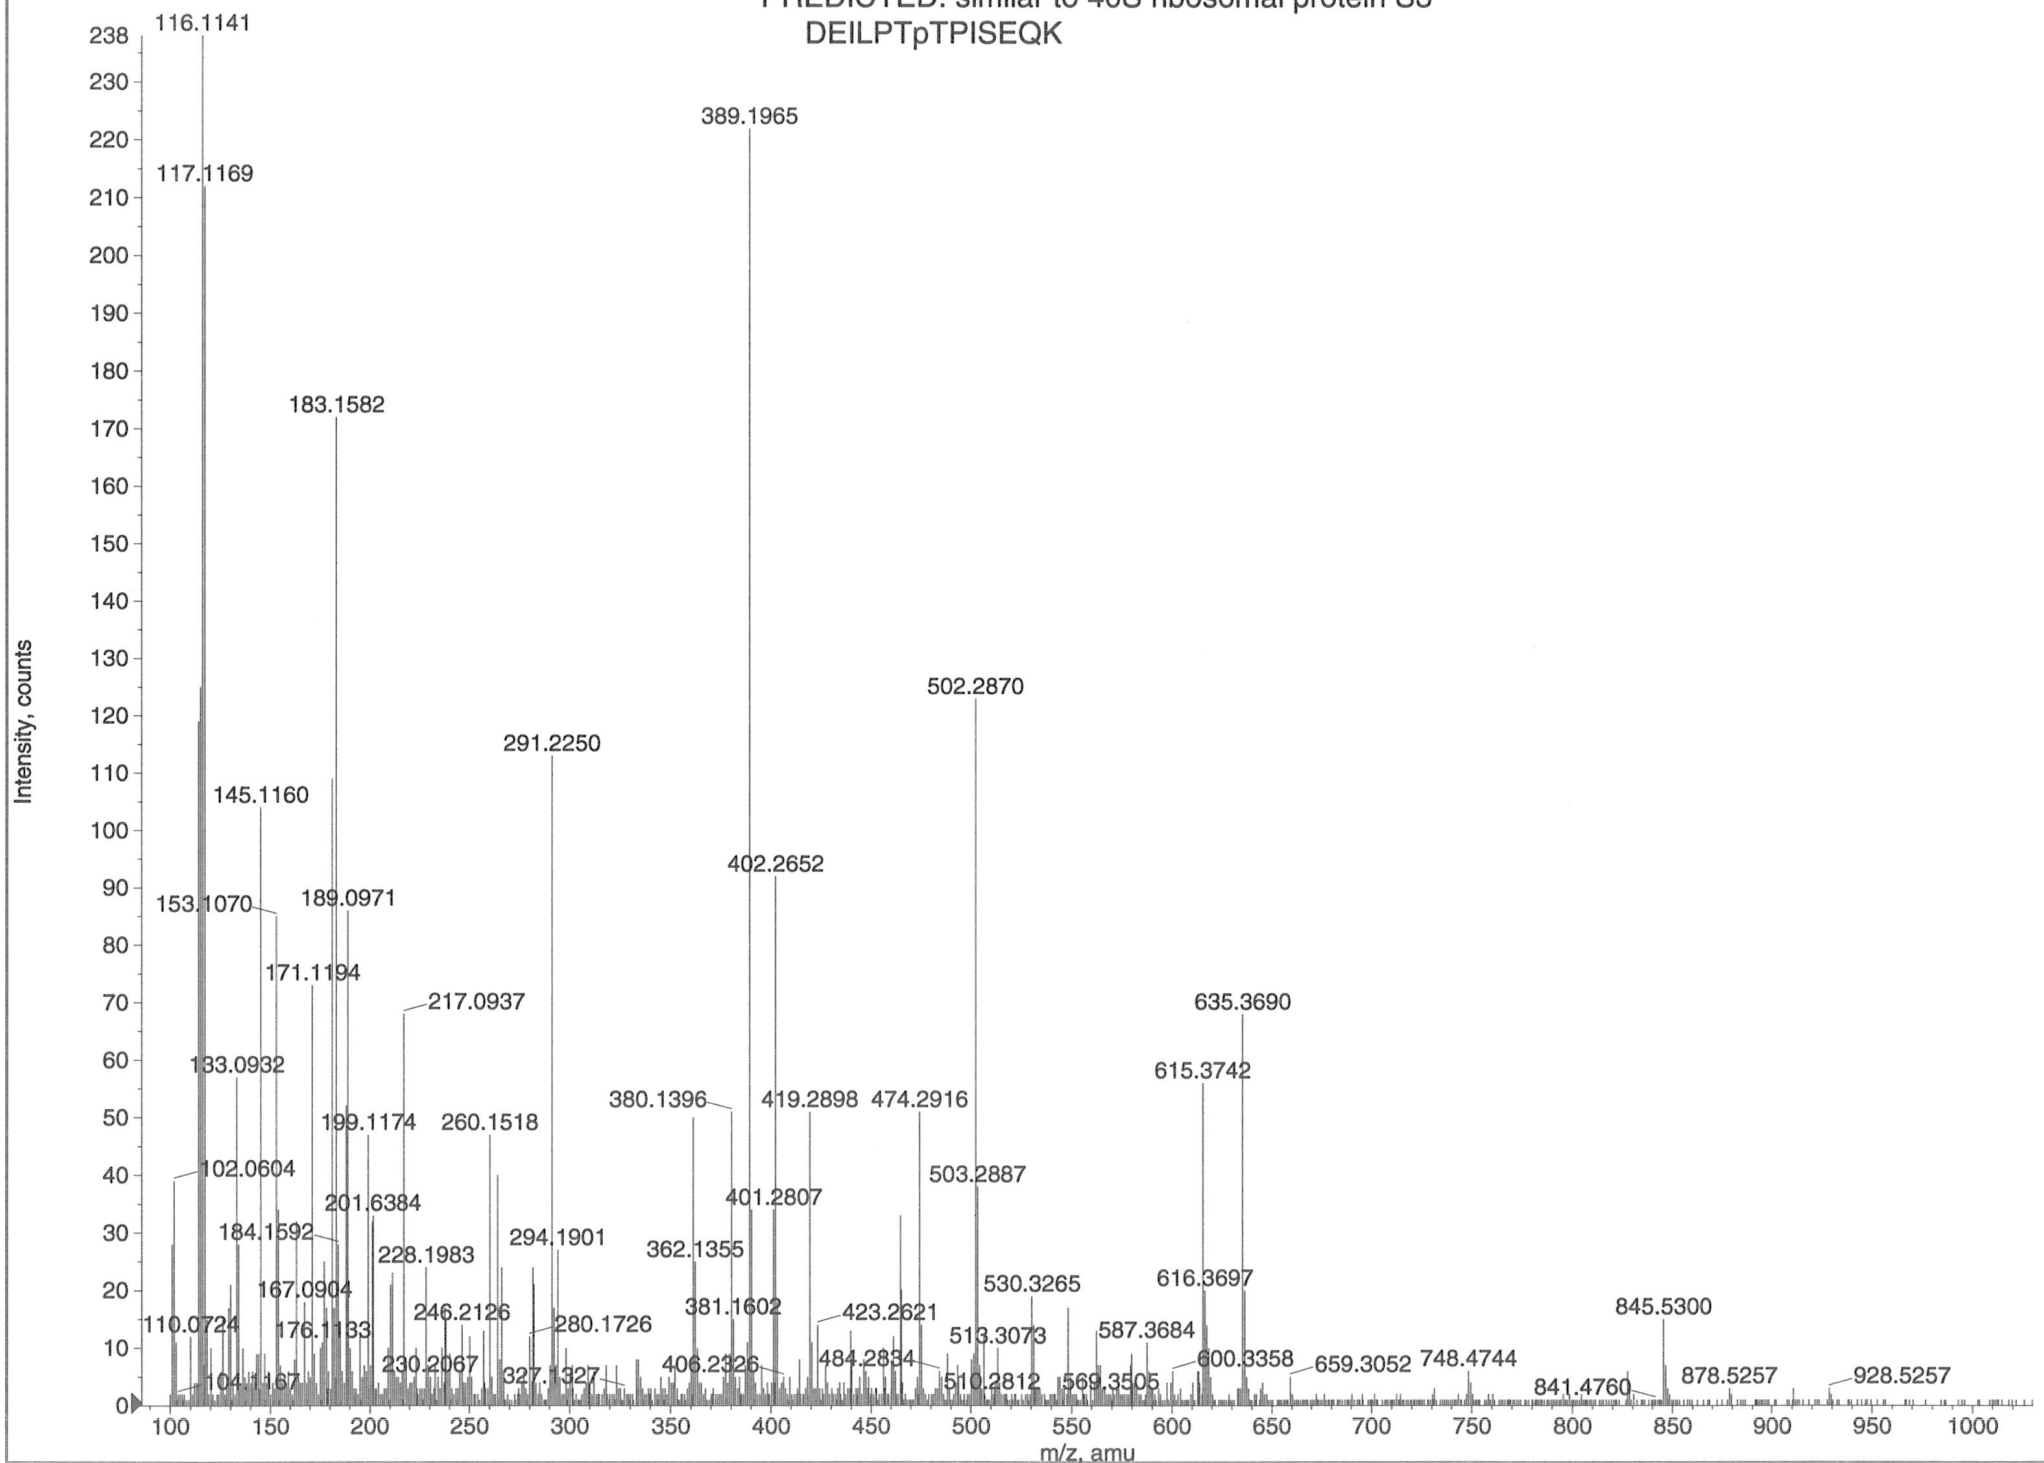



PREDICTED: similar to KIAA0592 protein

LTDEDFsPFGSGGGLFSGGK

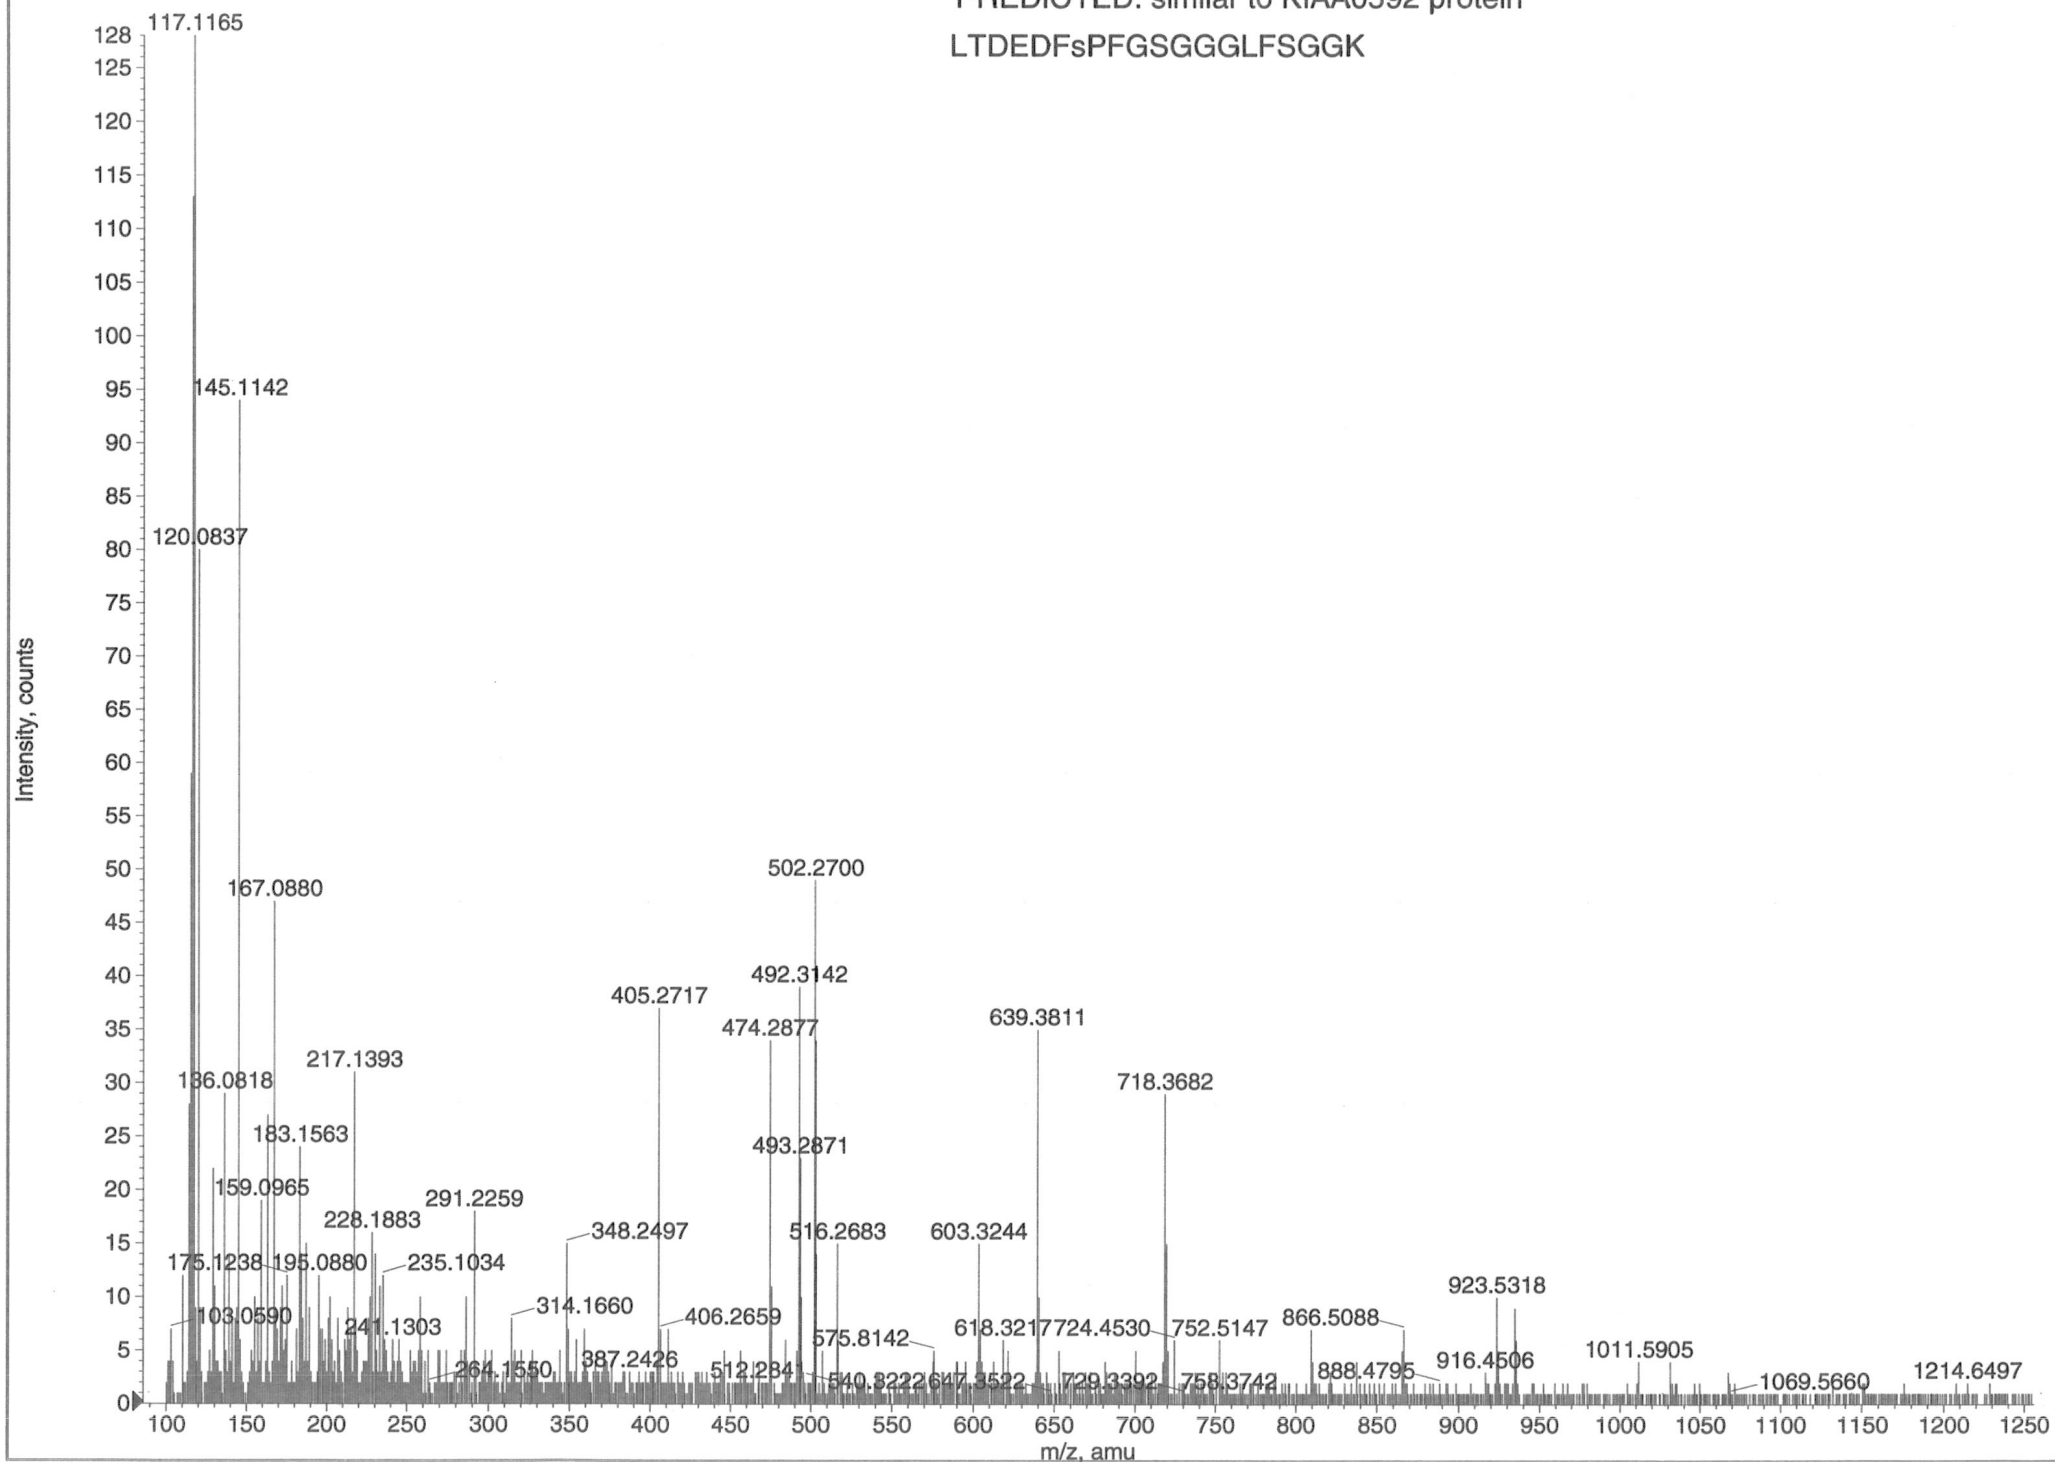

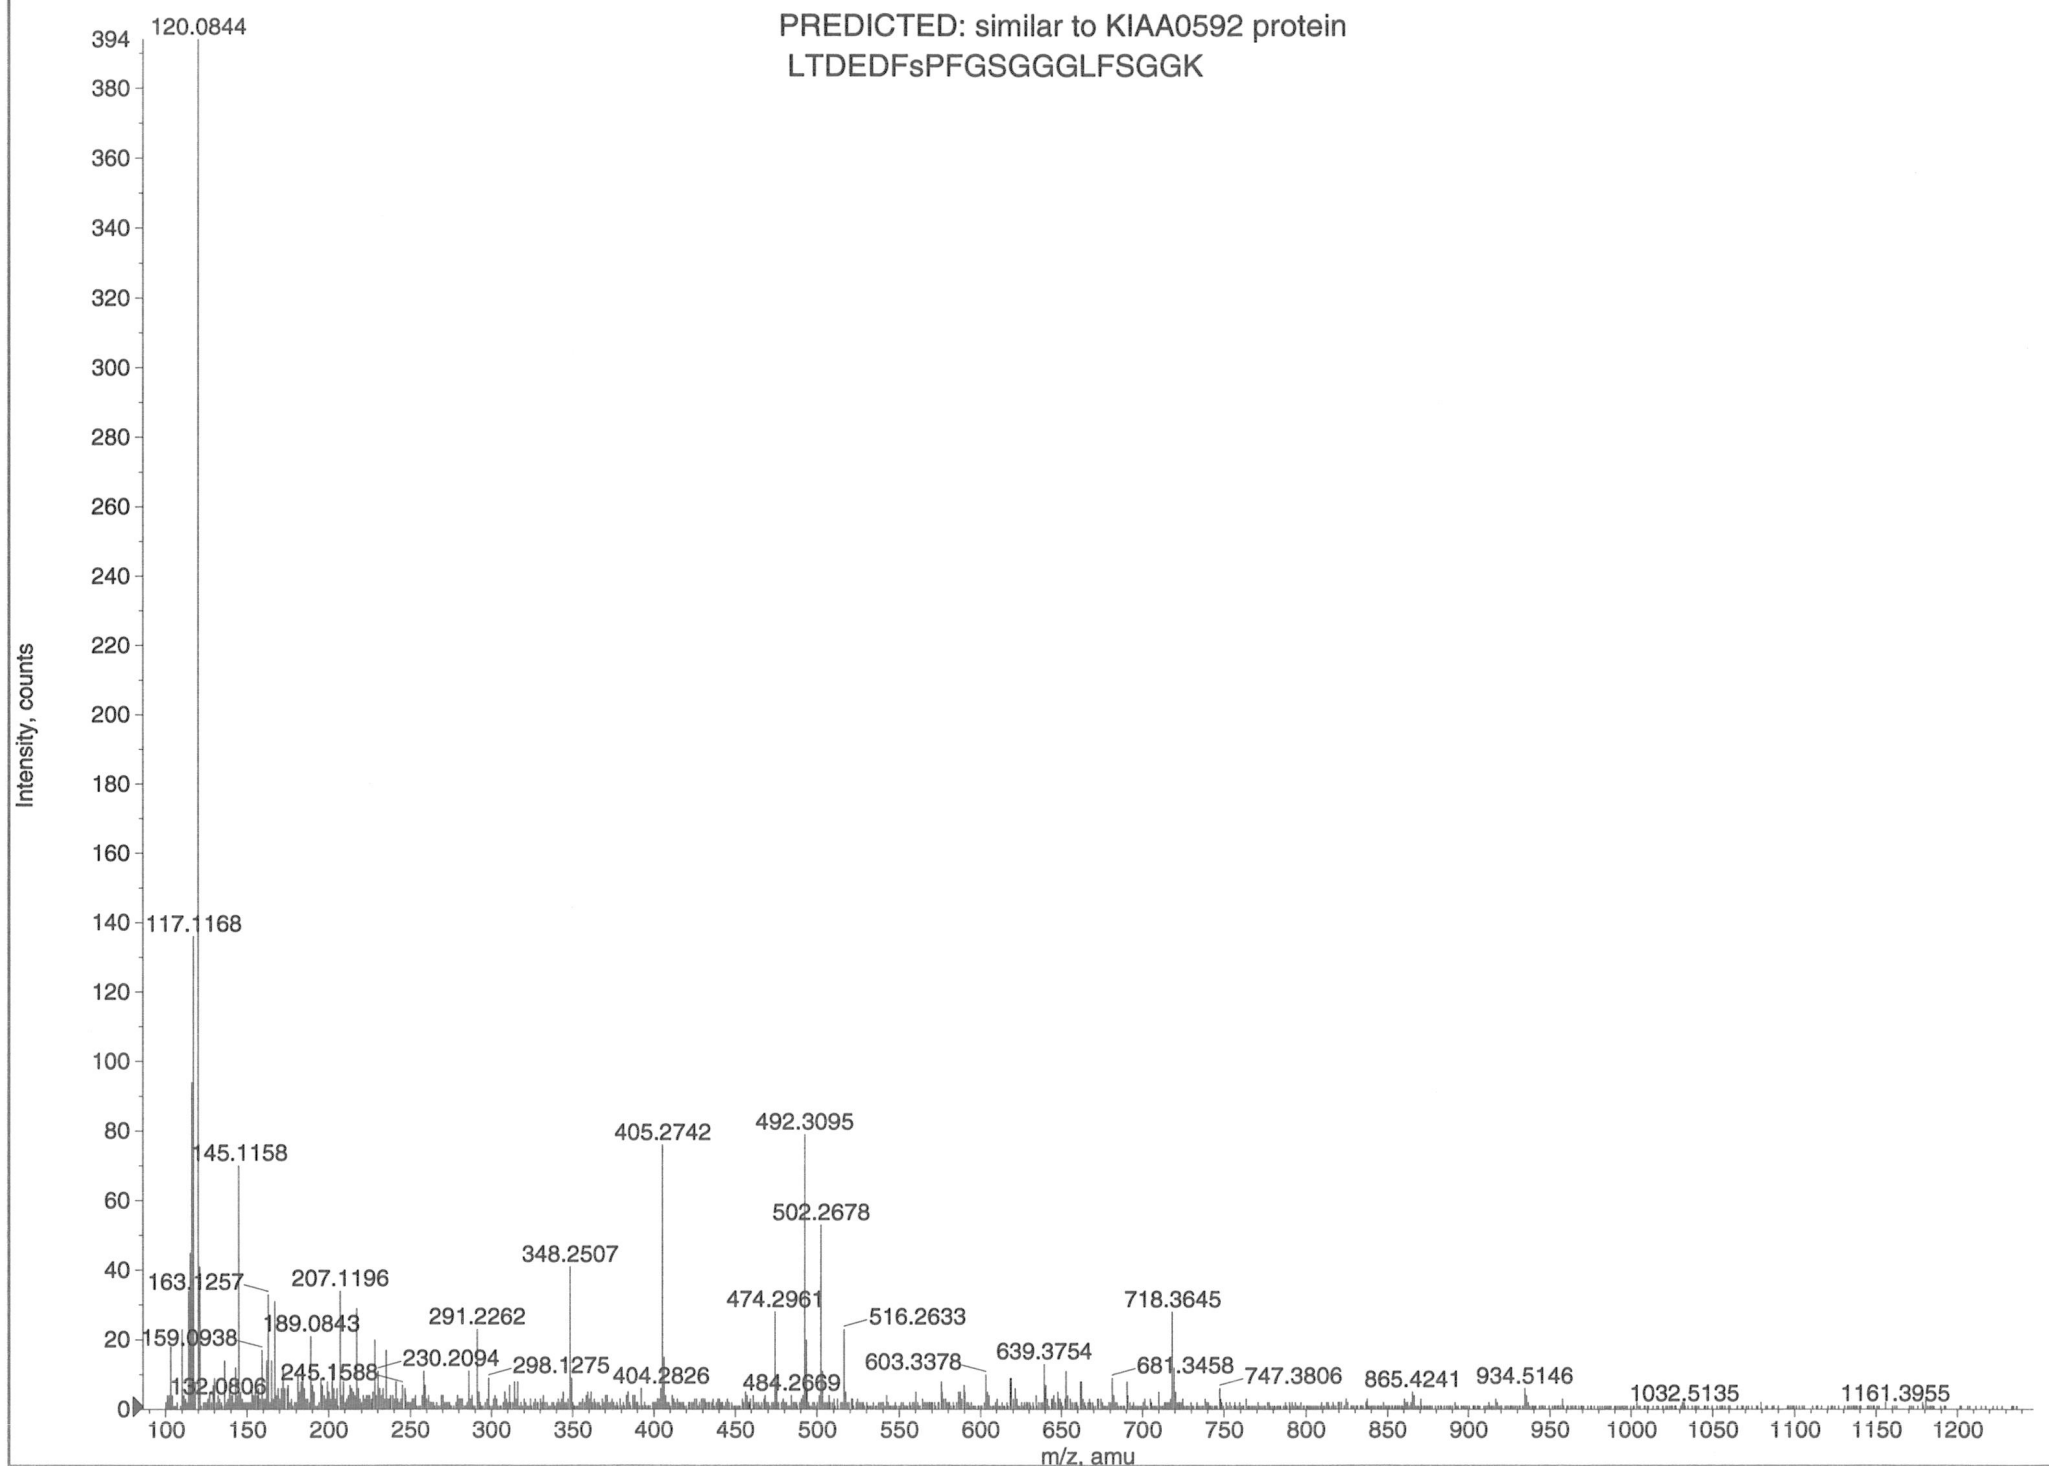

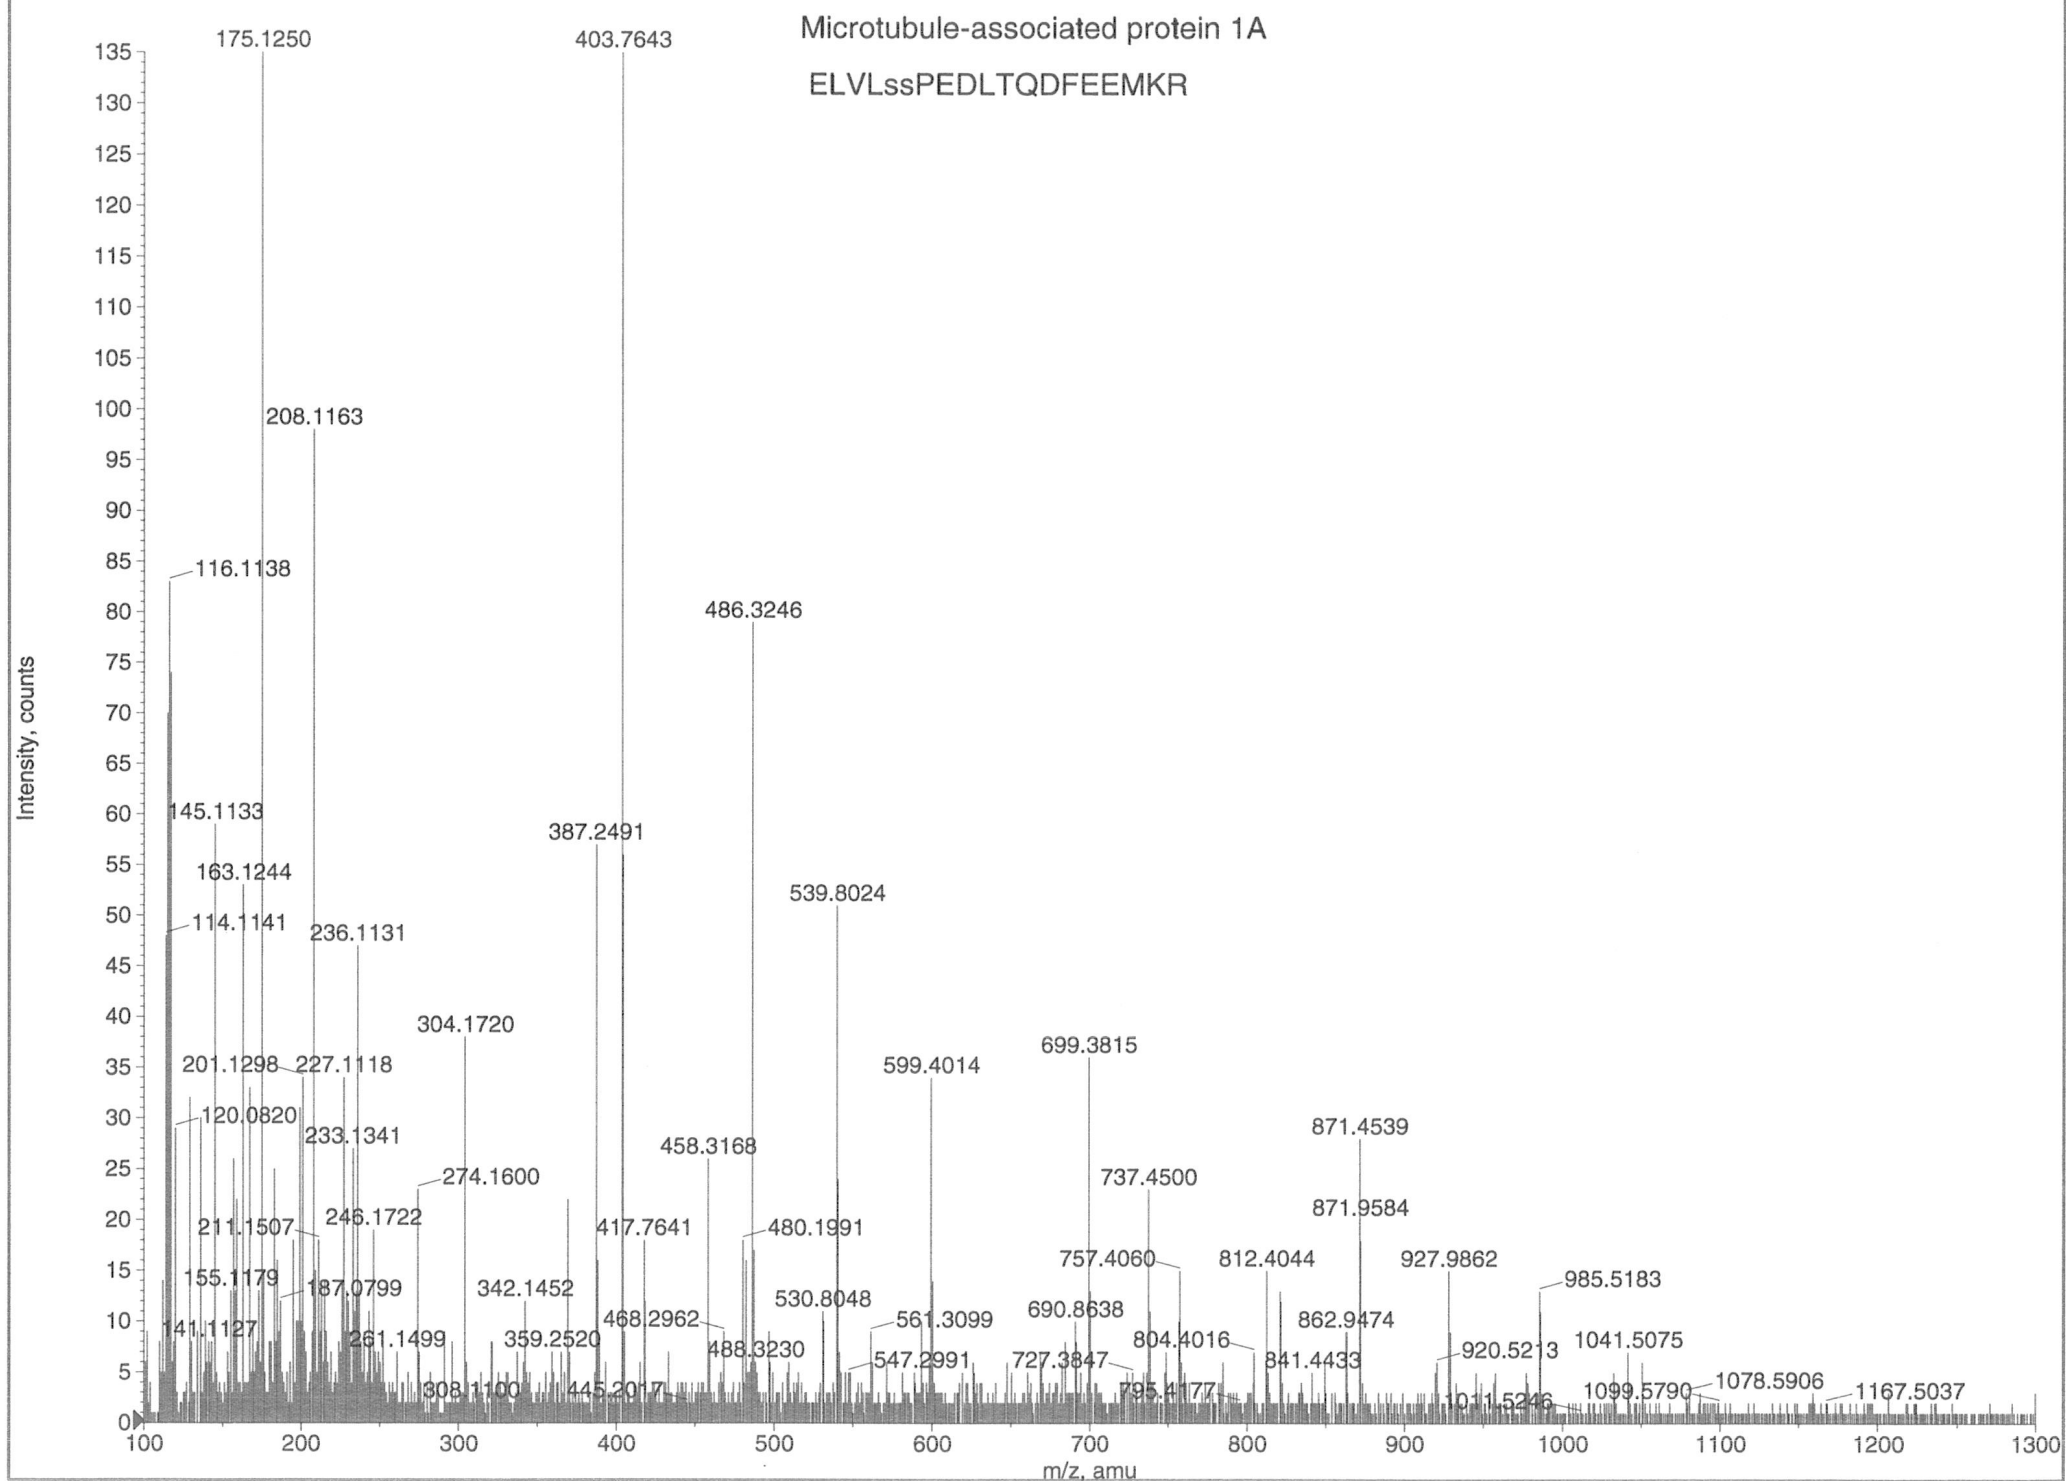

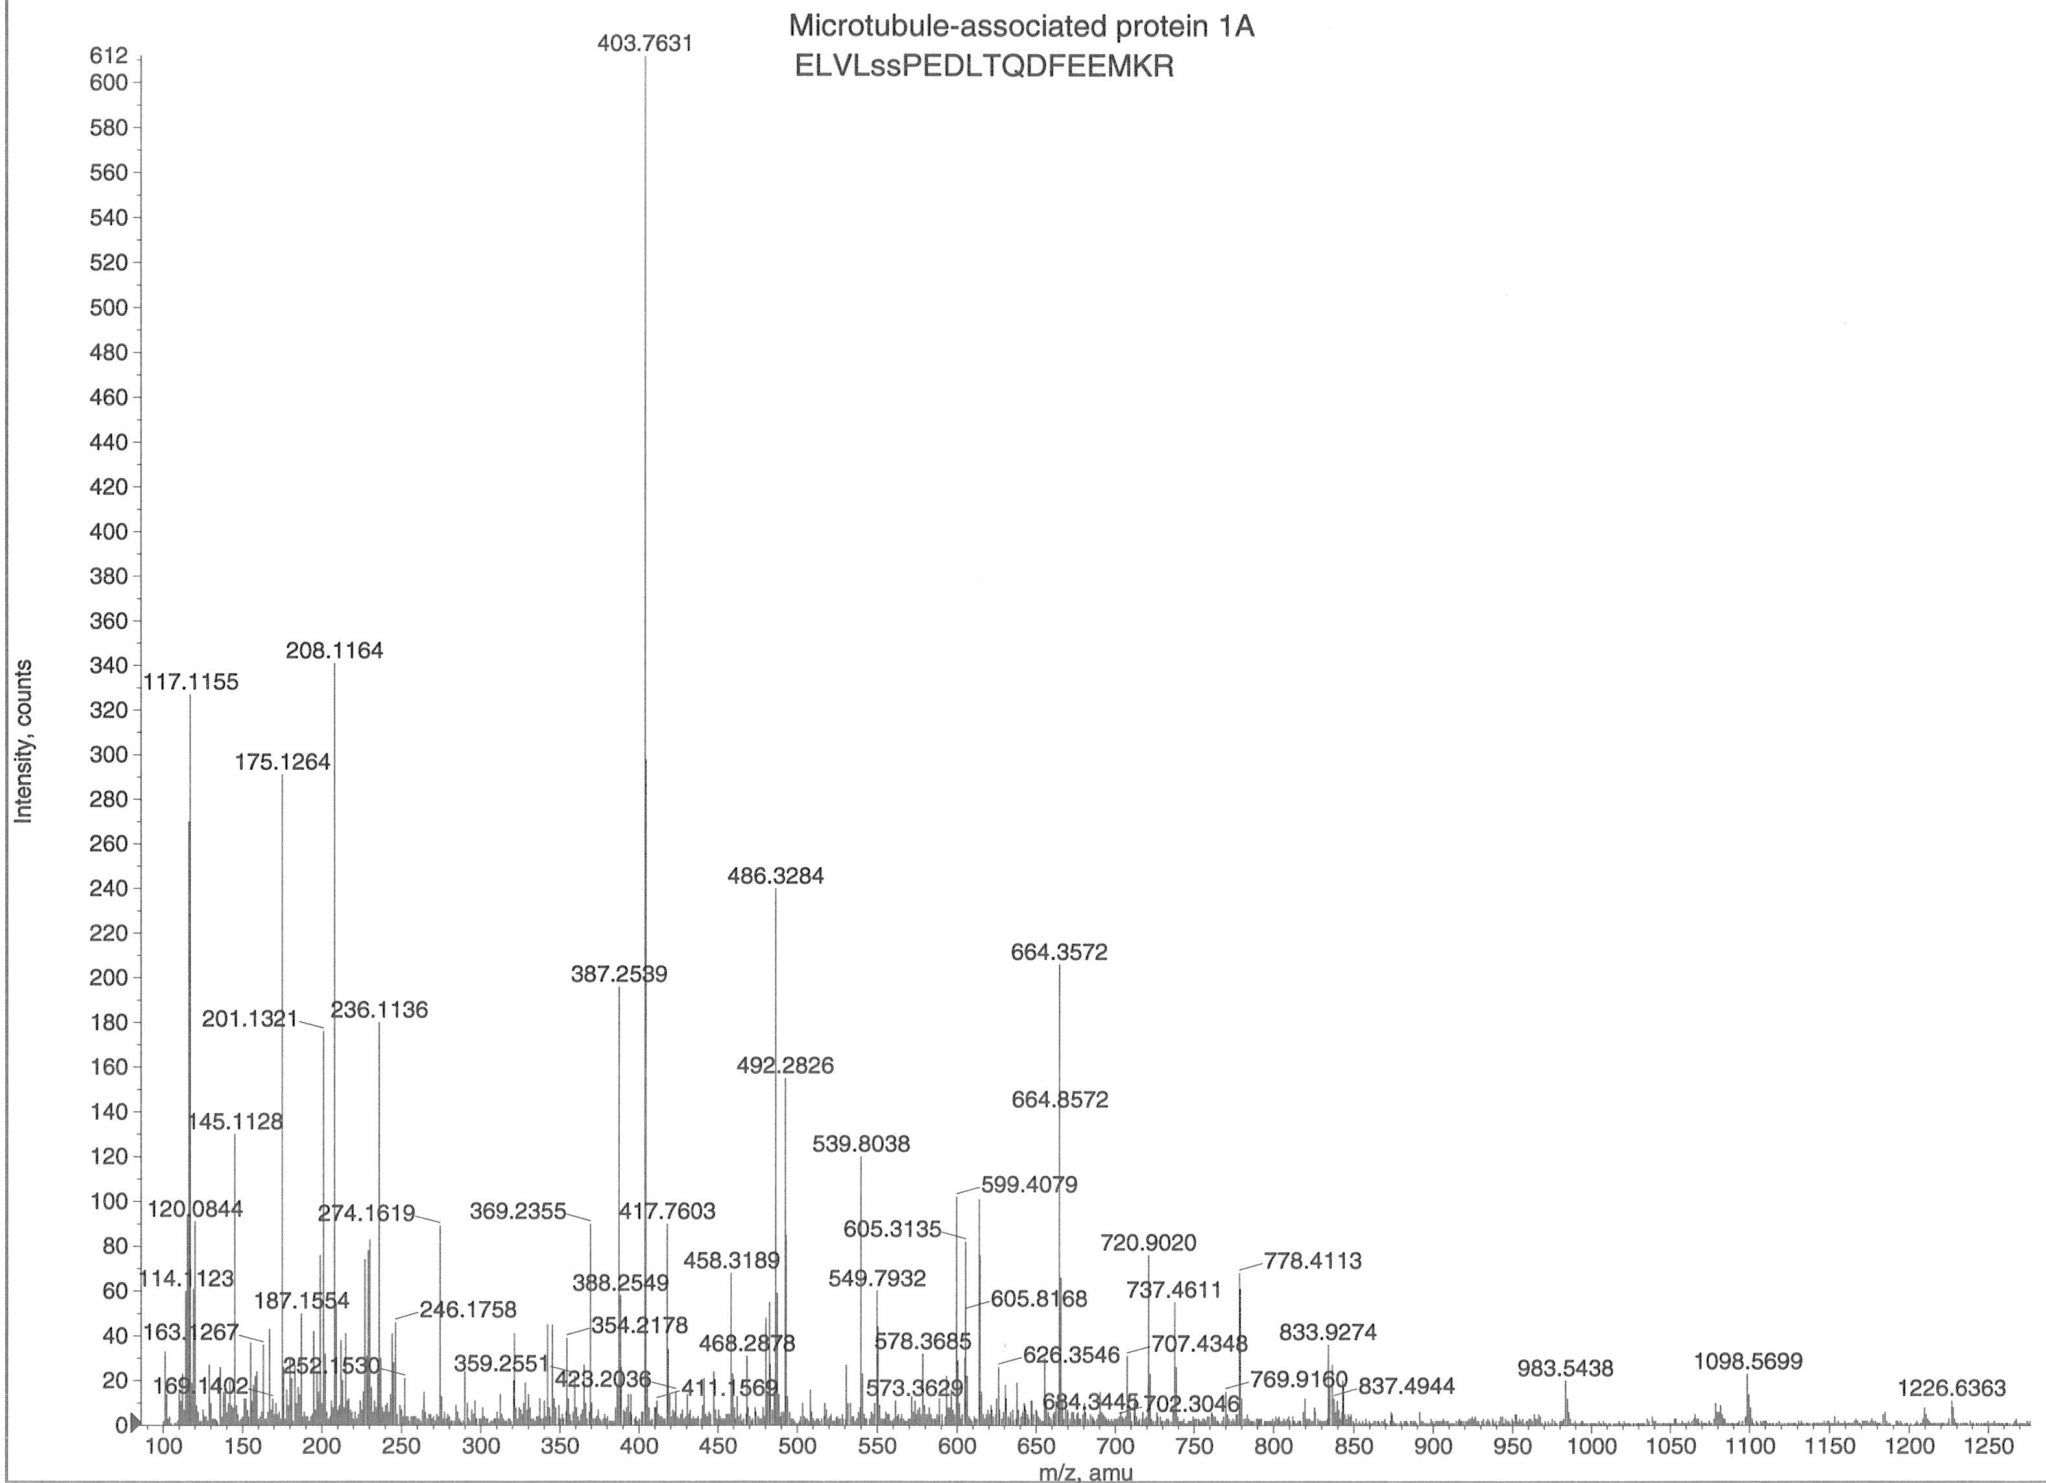

Microtubule-associated protein 1B isoform 2  
SVNFSLTpNEIK

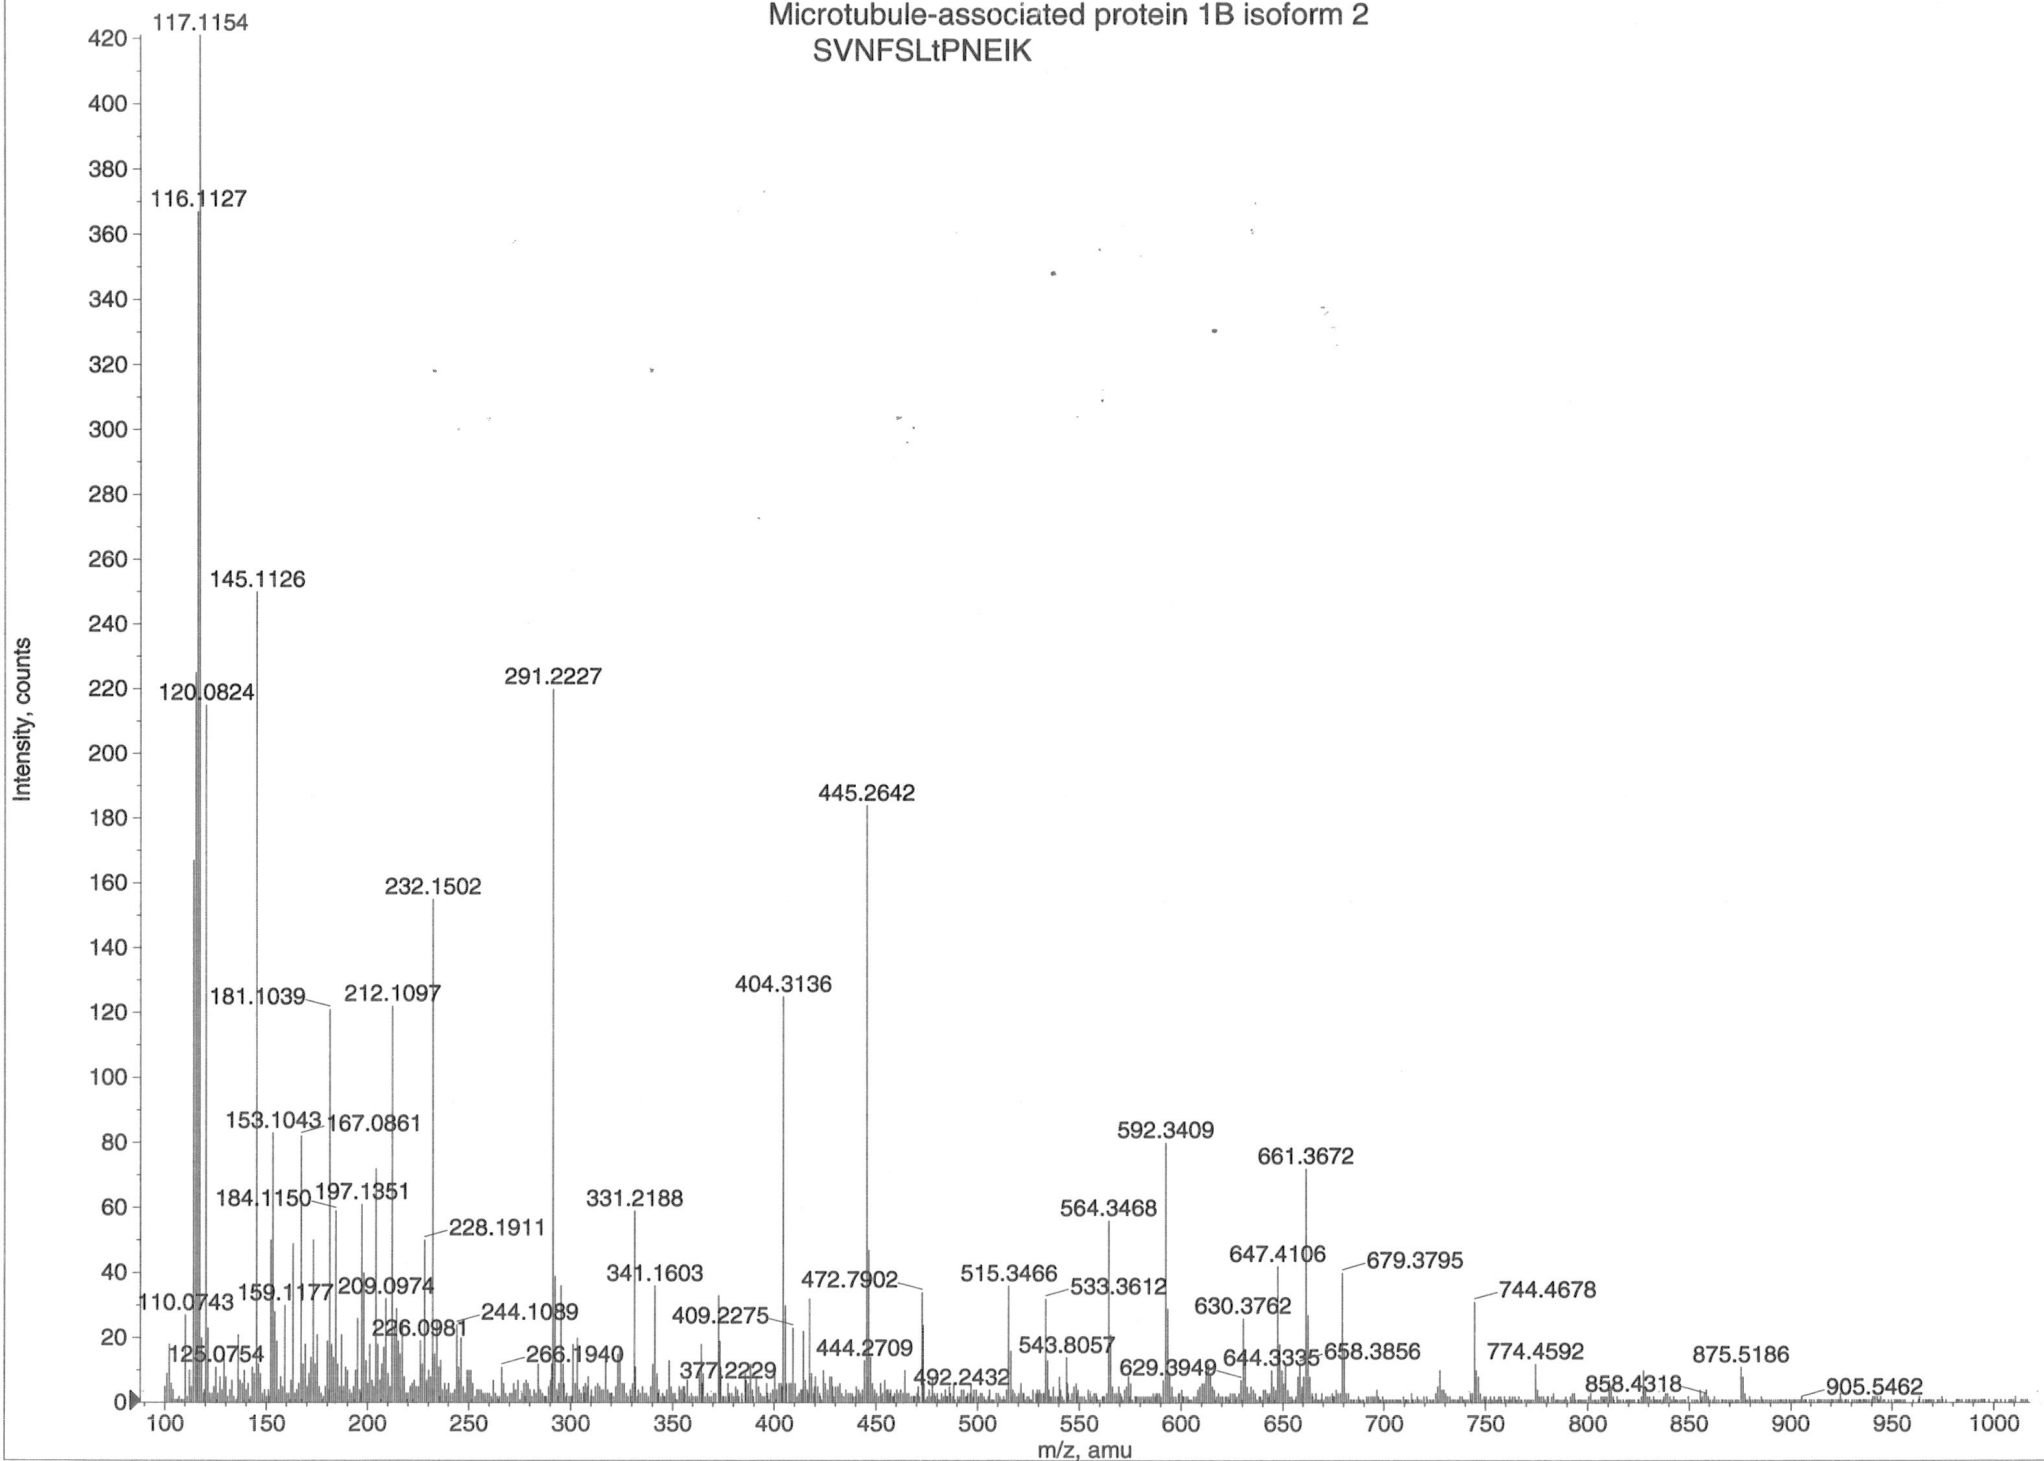

Microtubule-associated protein 1B isoform 2  
SVNFSLTPNEIK

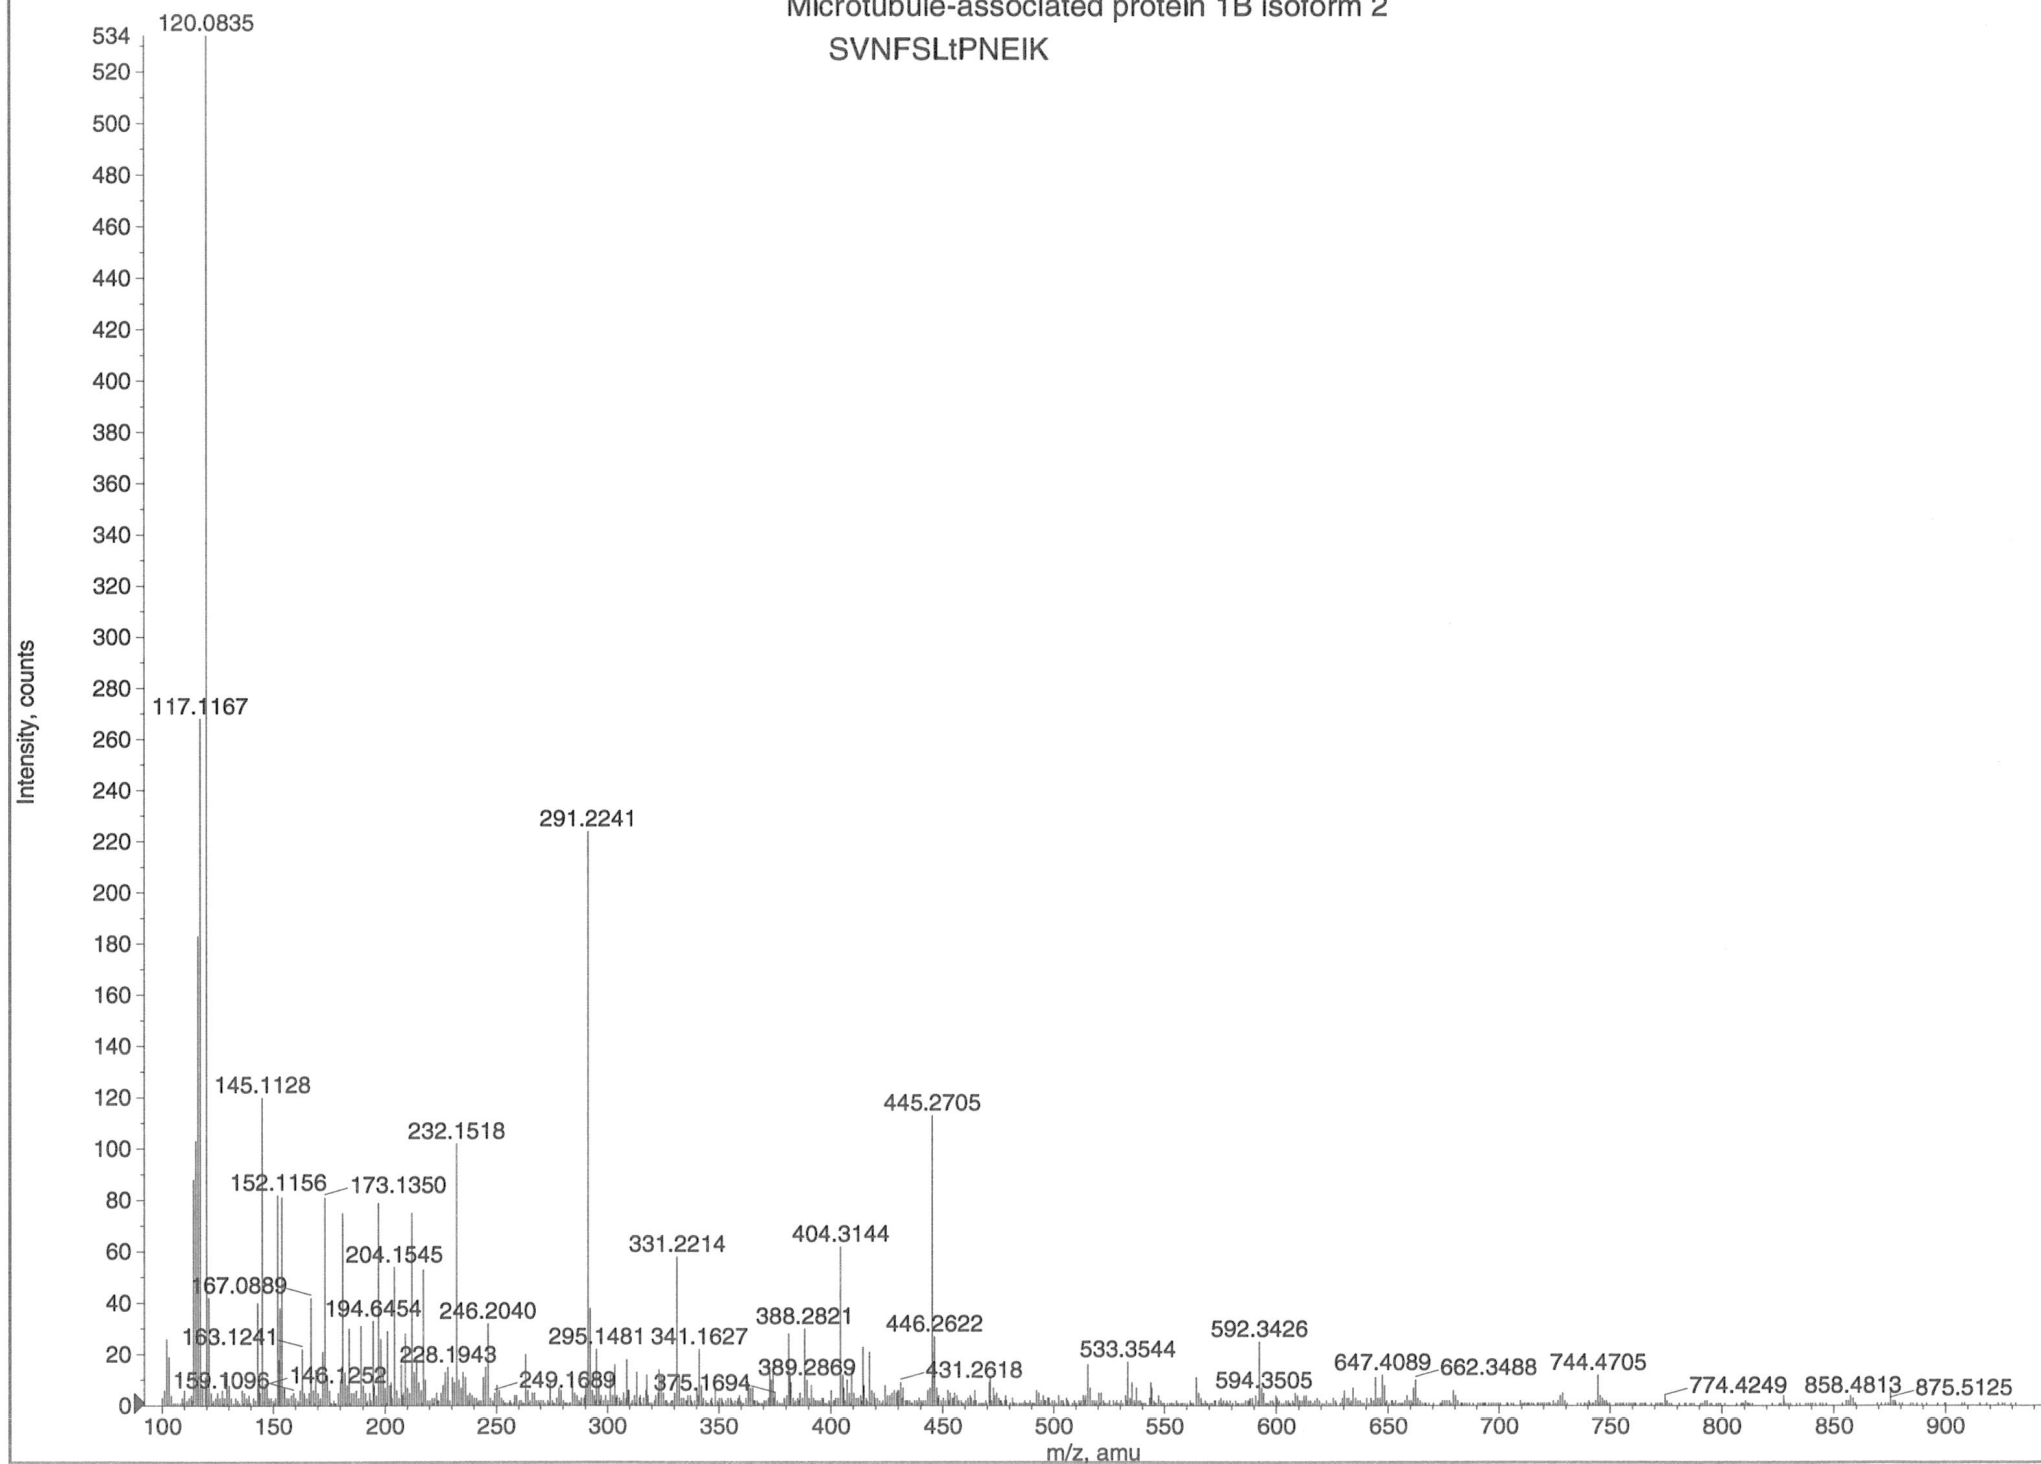

Microtubule-associated protein 1B isoform 2  
SDISPLtPRESsPLYSPtFSDSTSAVK or  
SDISPLtPRESsPLYsPTFSDSTSAVK

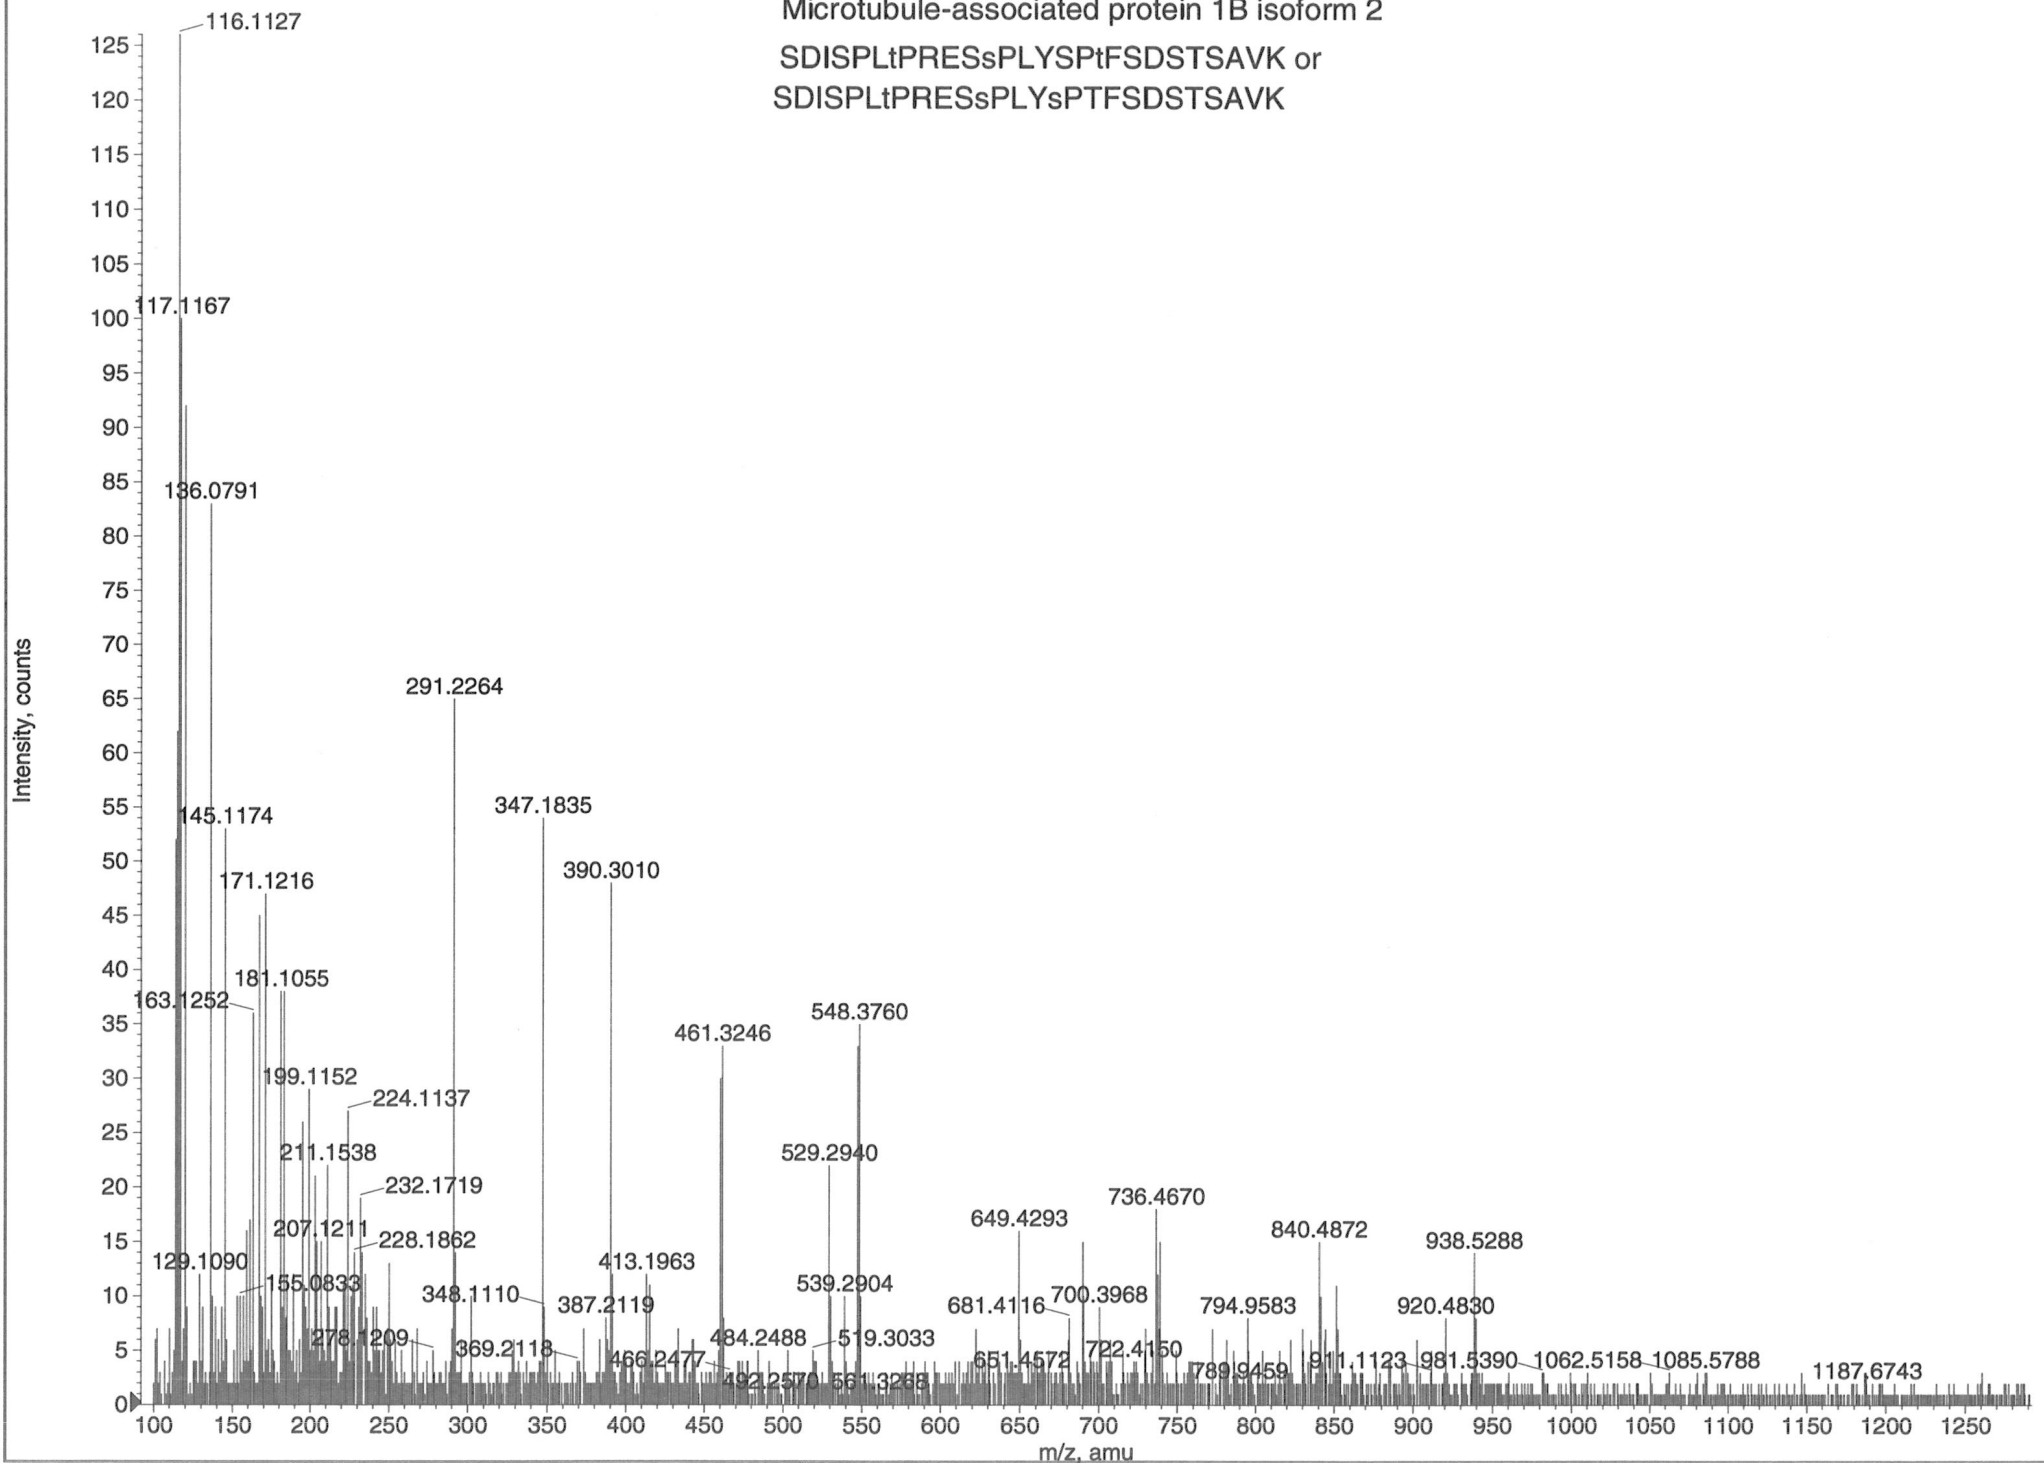

Microtubule-associated protein 1B isoform 2  
AAEAGGAEQYGFLTPTK

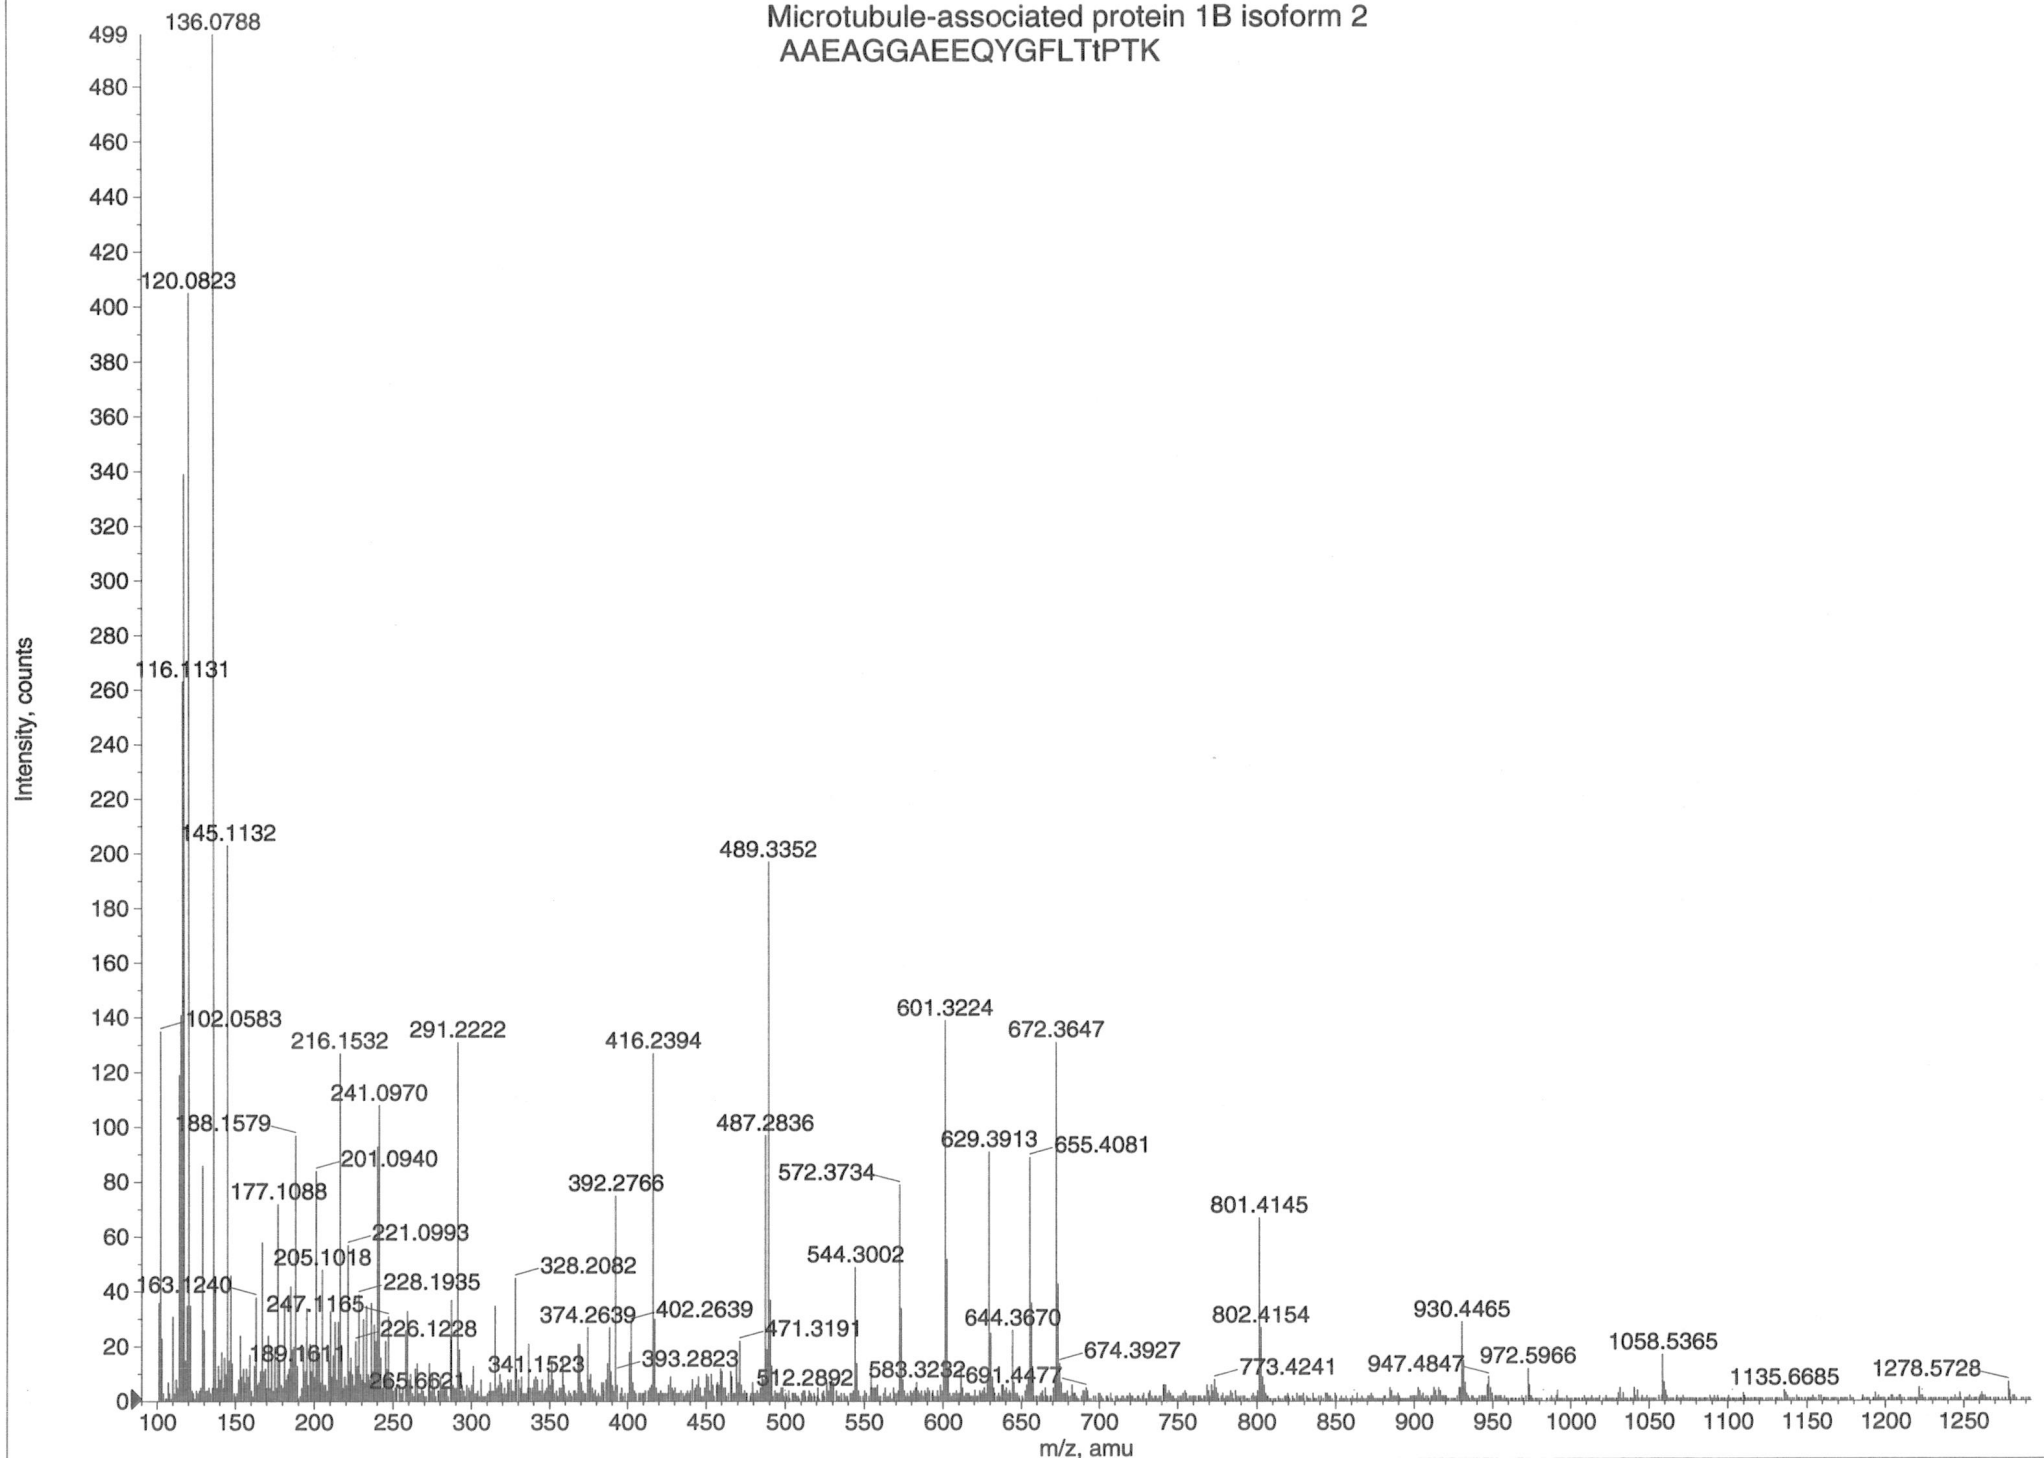



Microtubule-associated protein 1B isoform 2  
AAEAGGAEEQYGFLTtPTK

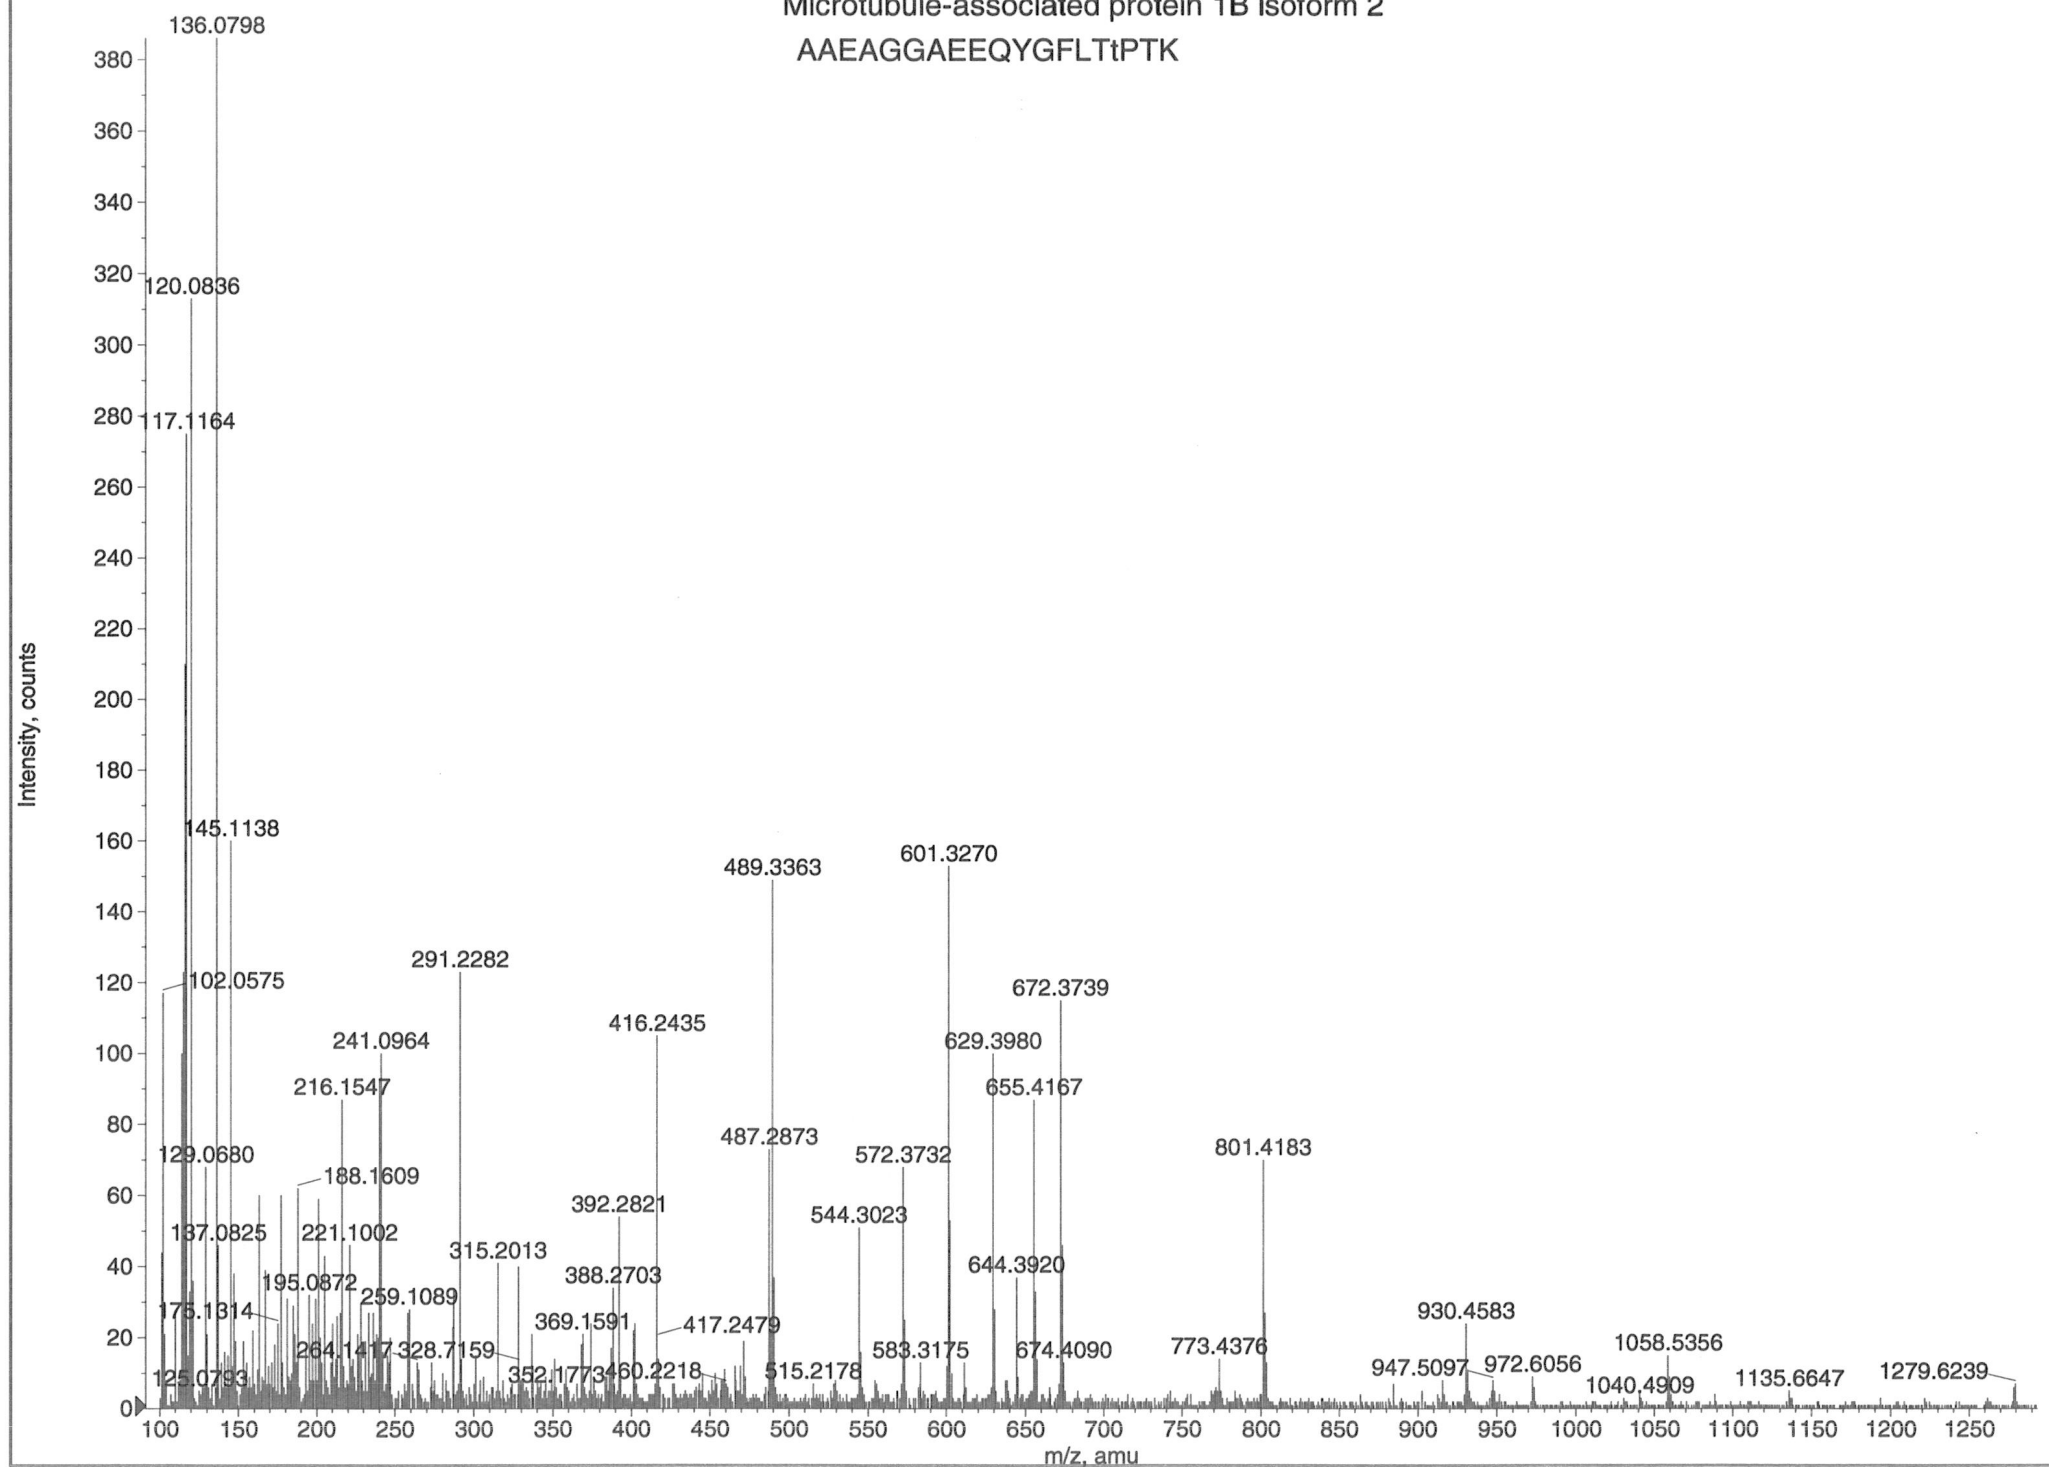

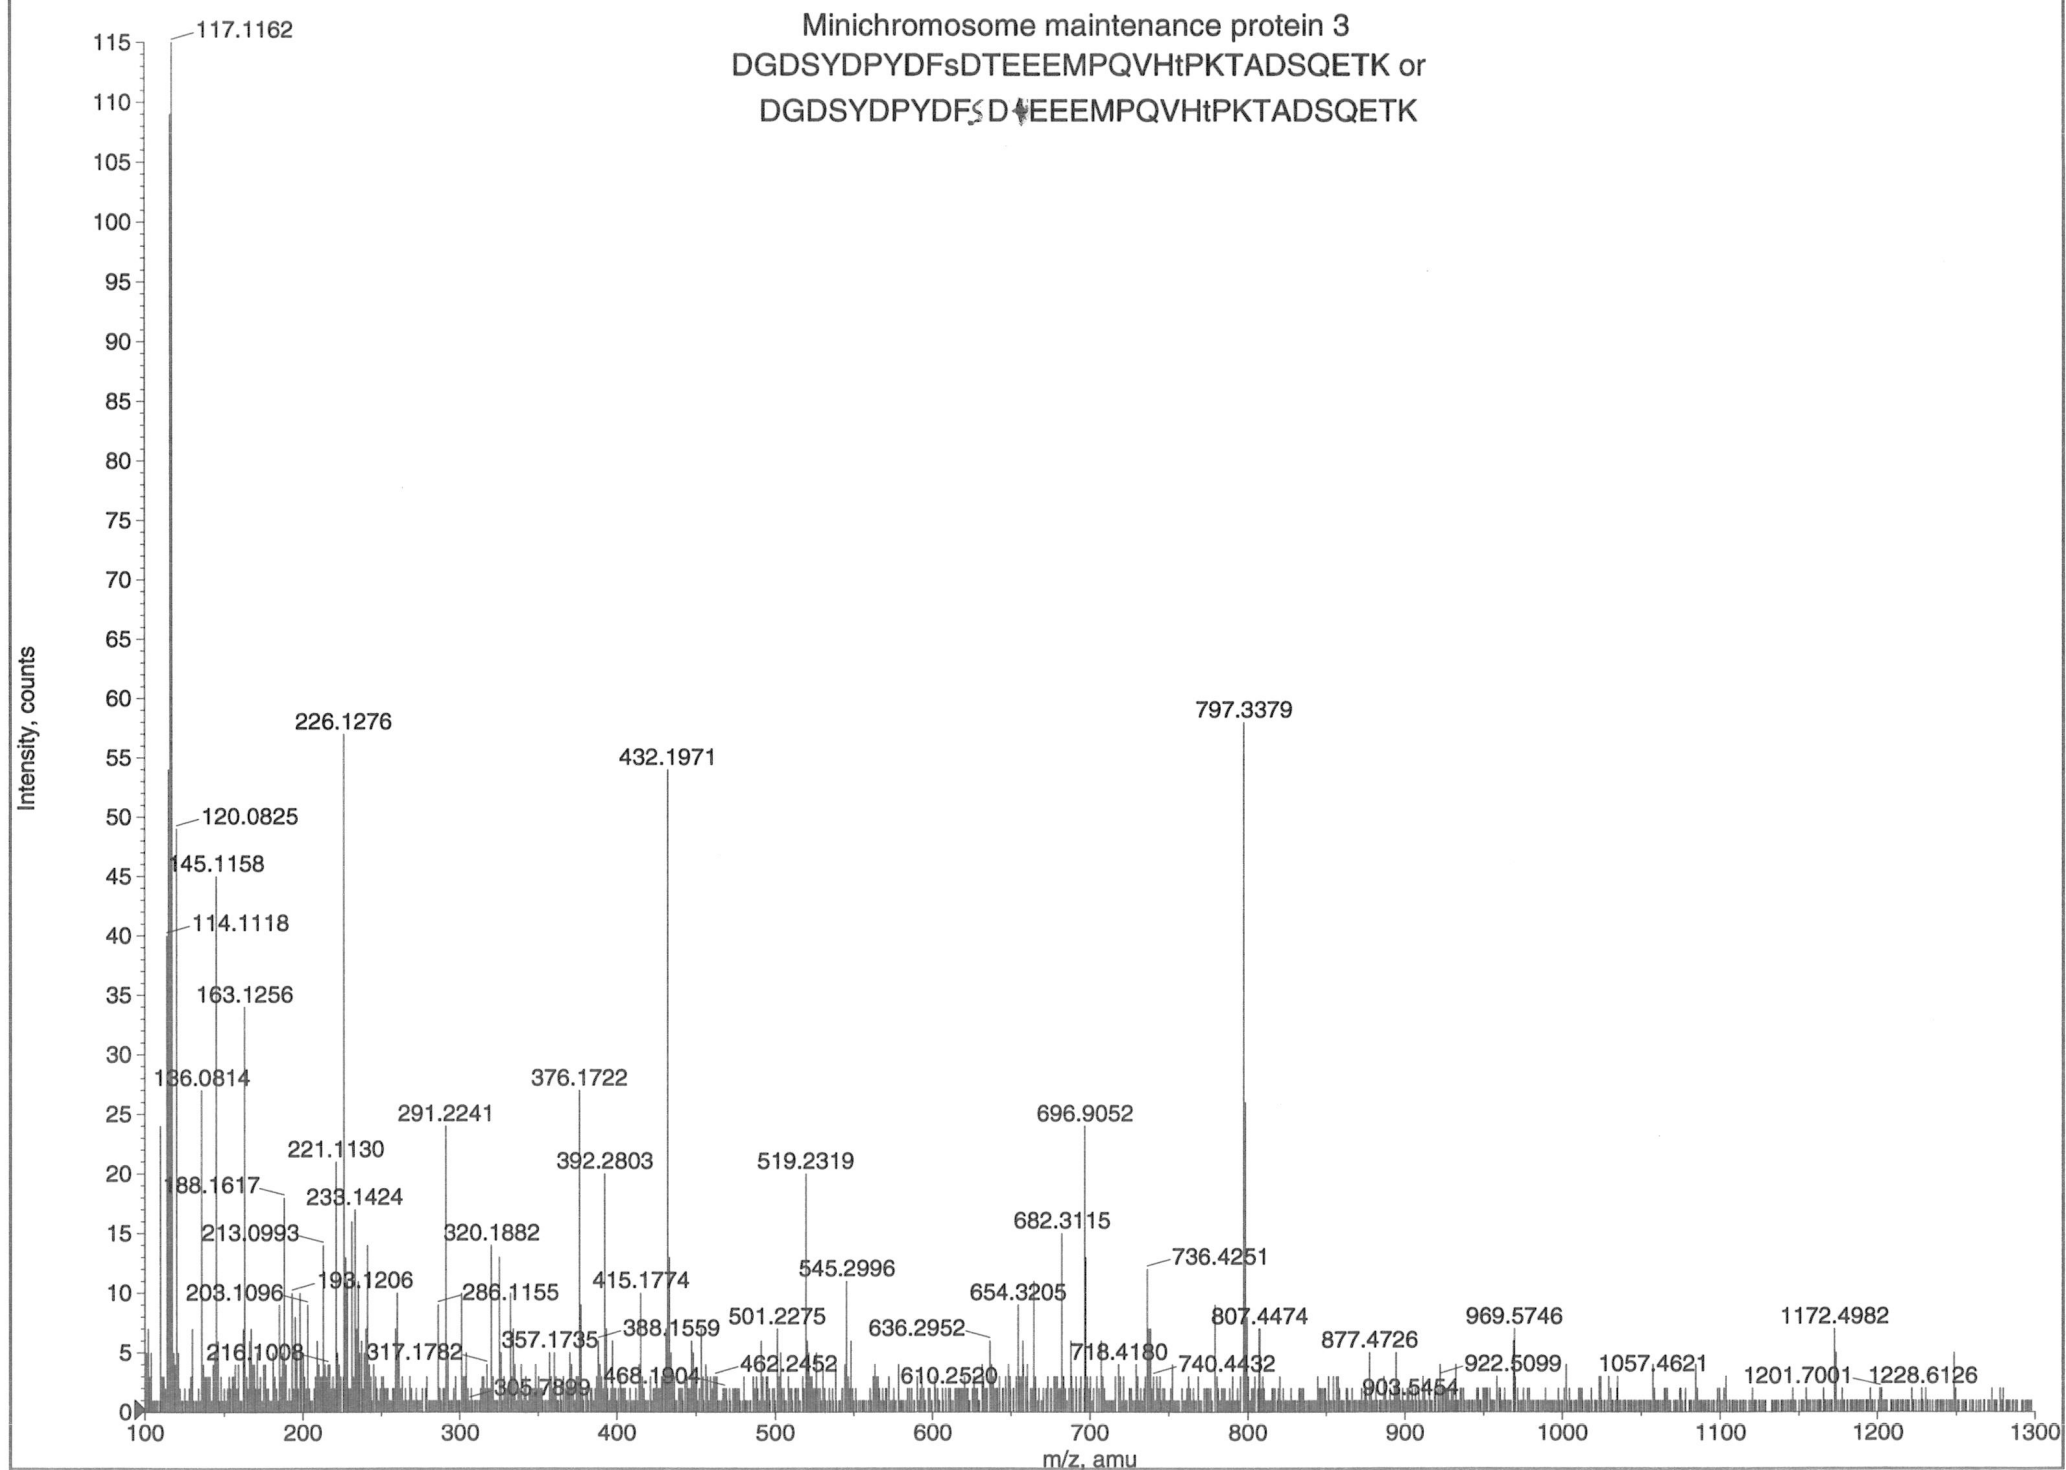

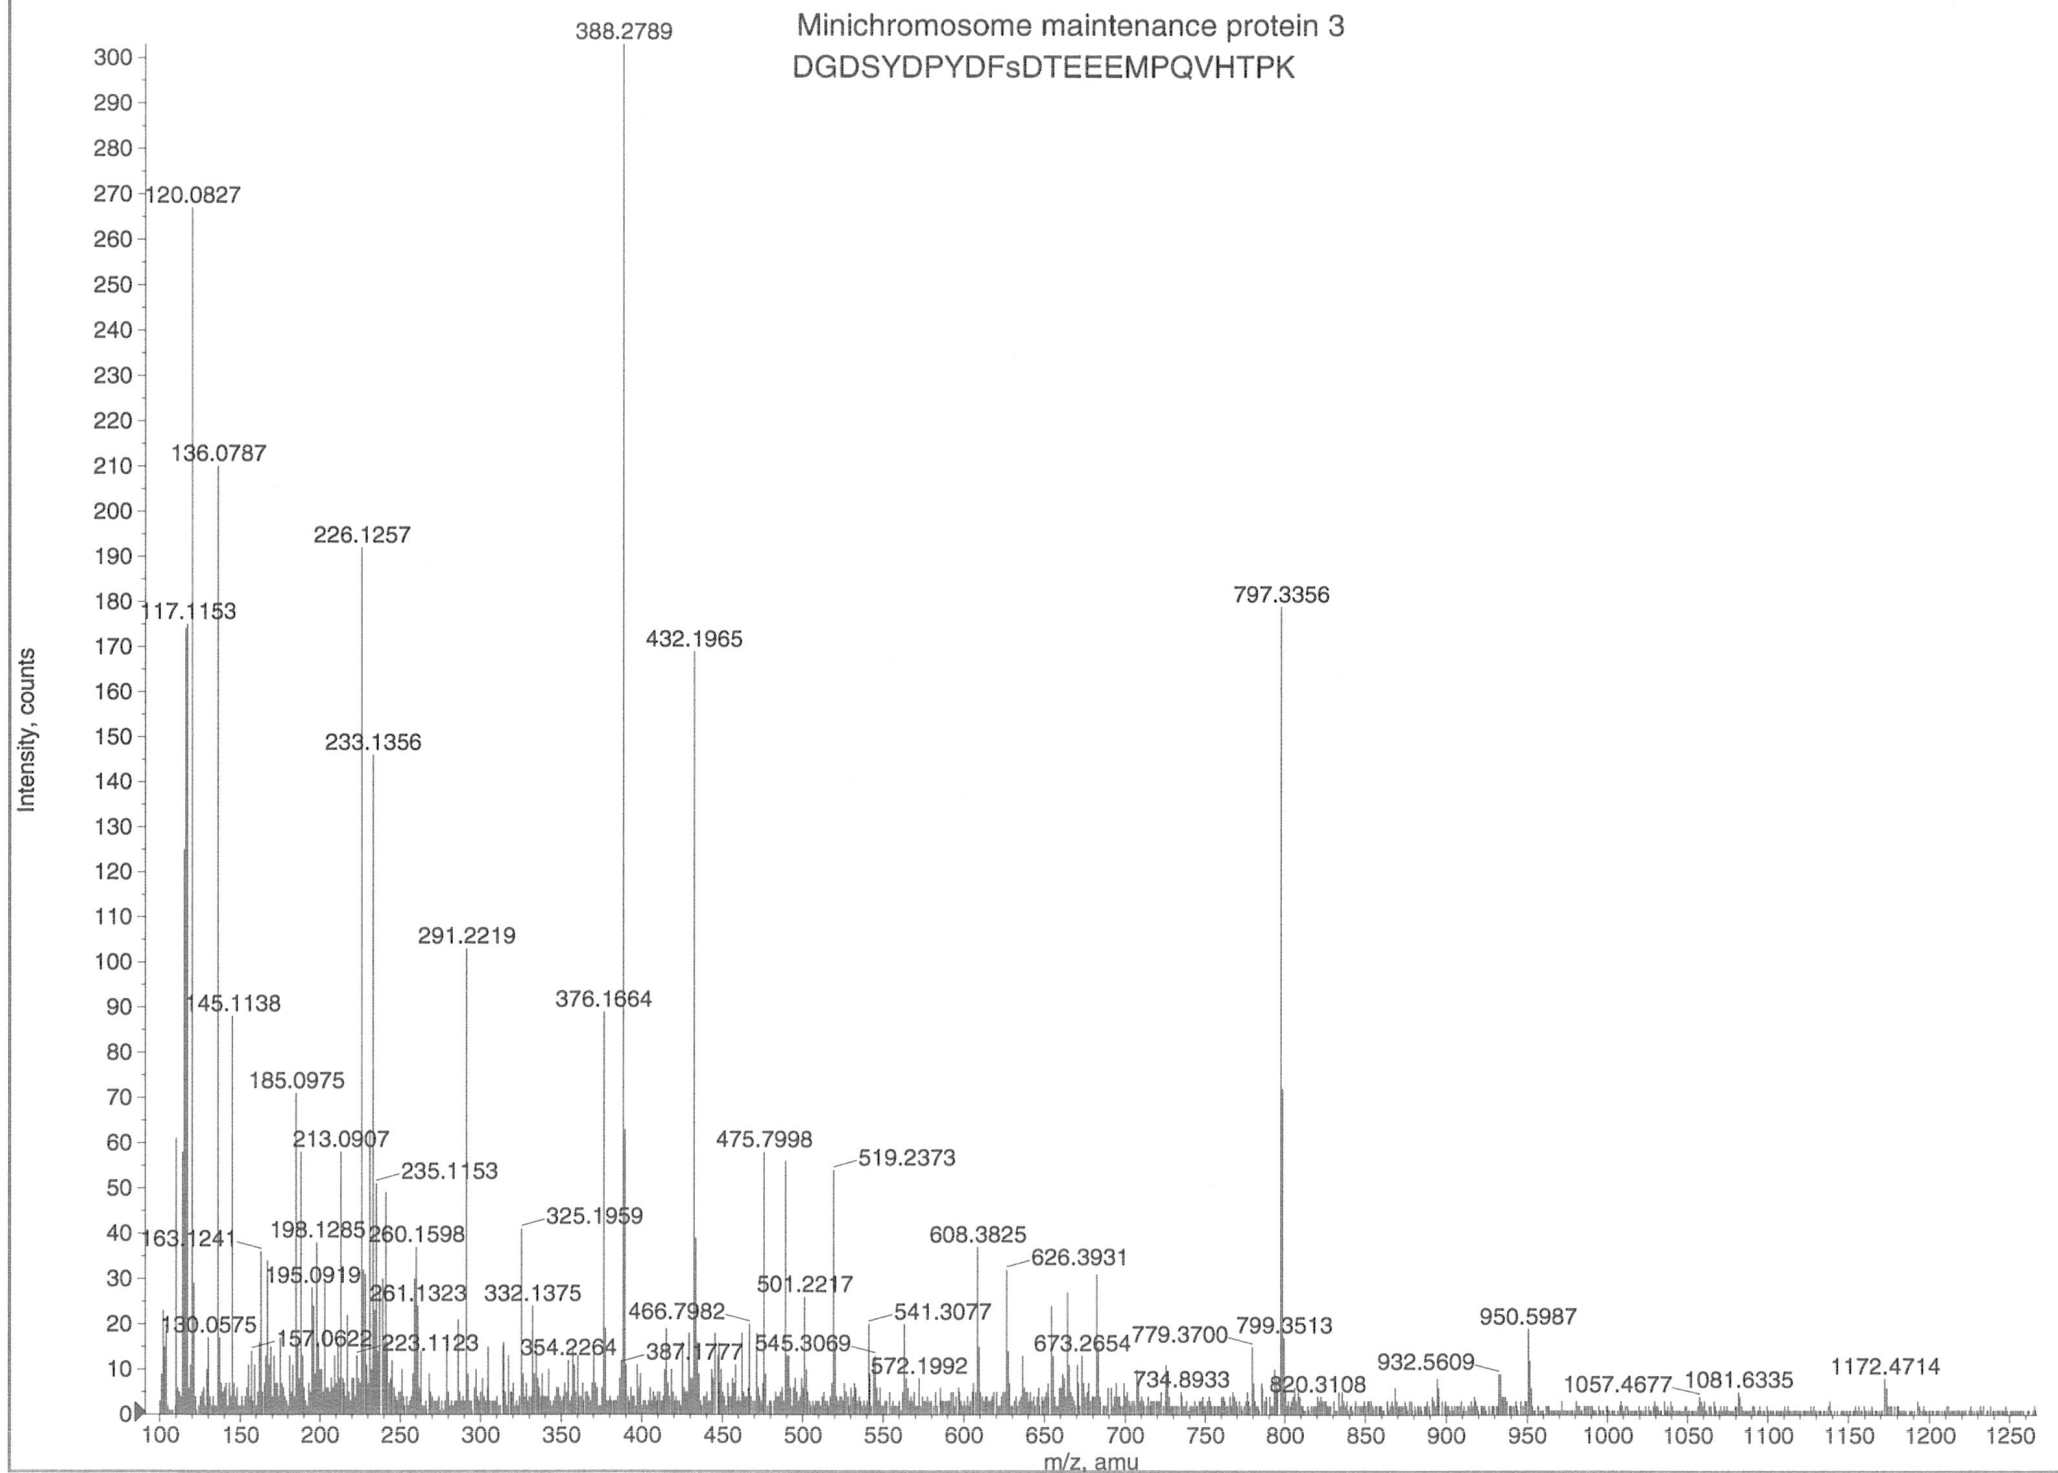

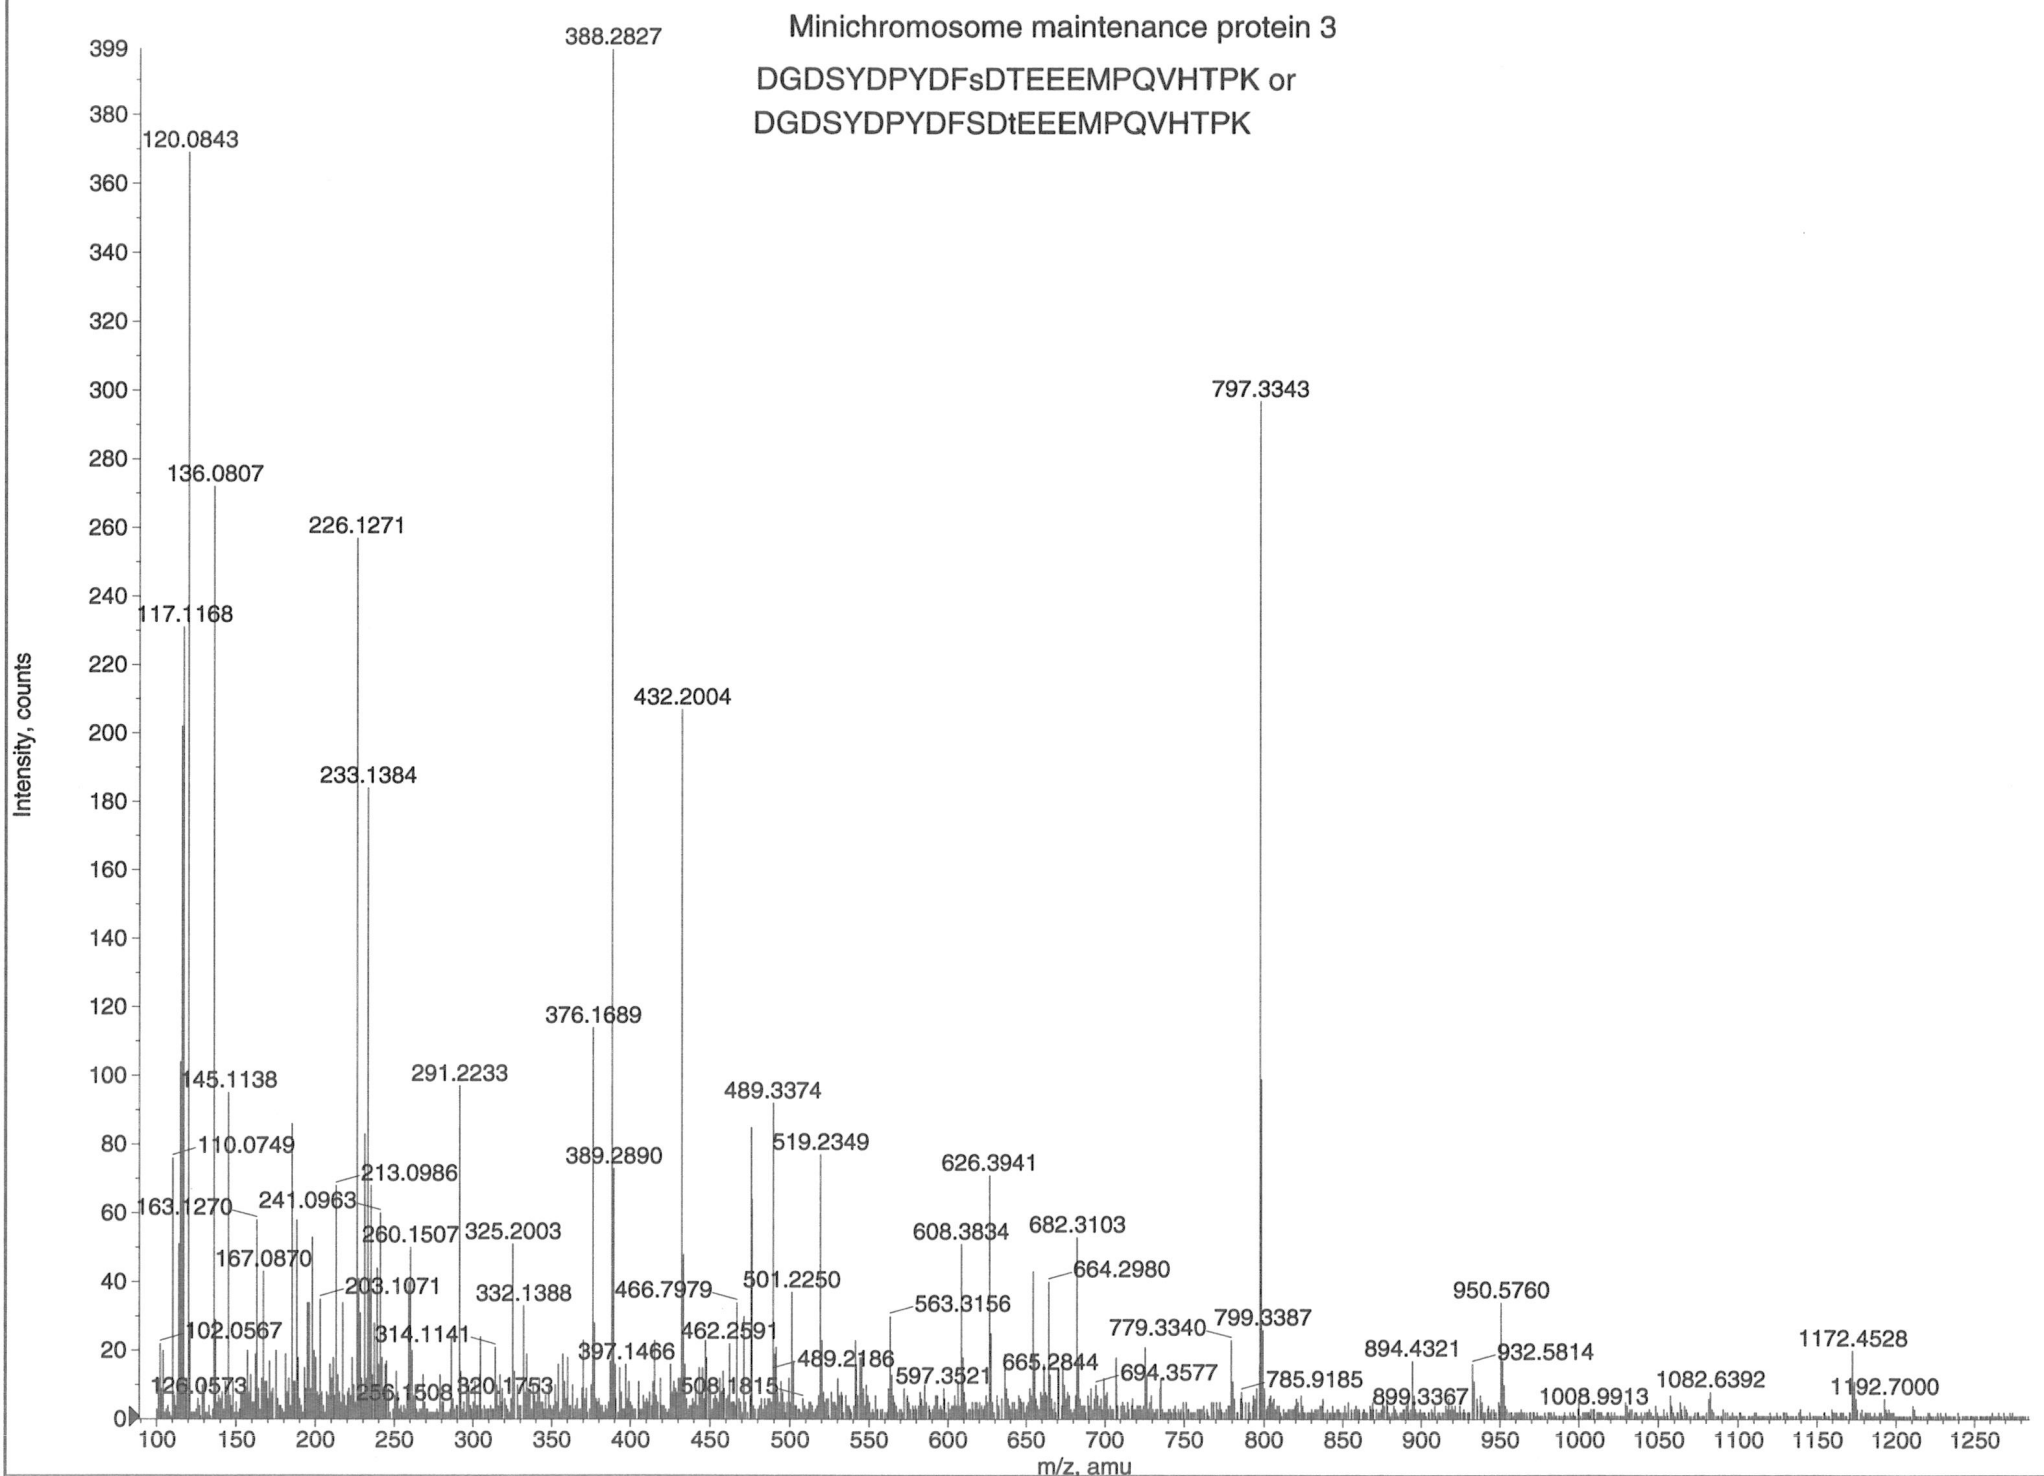

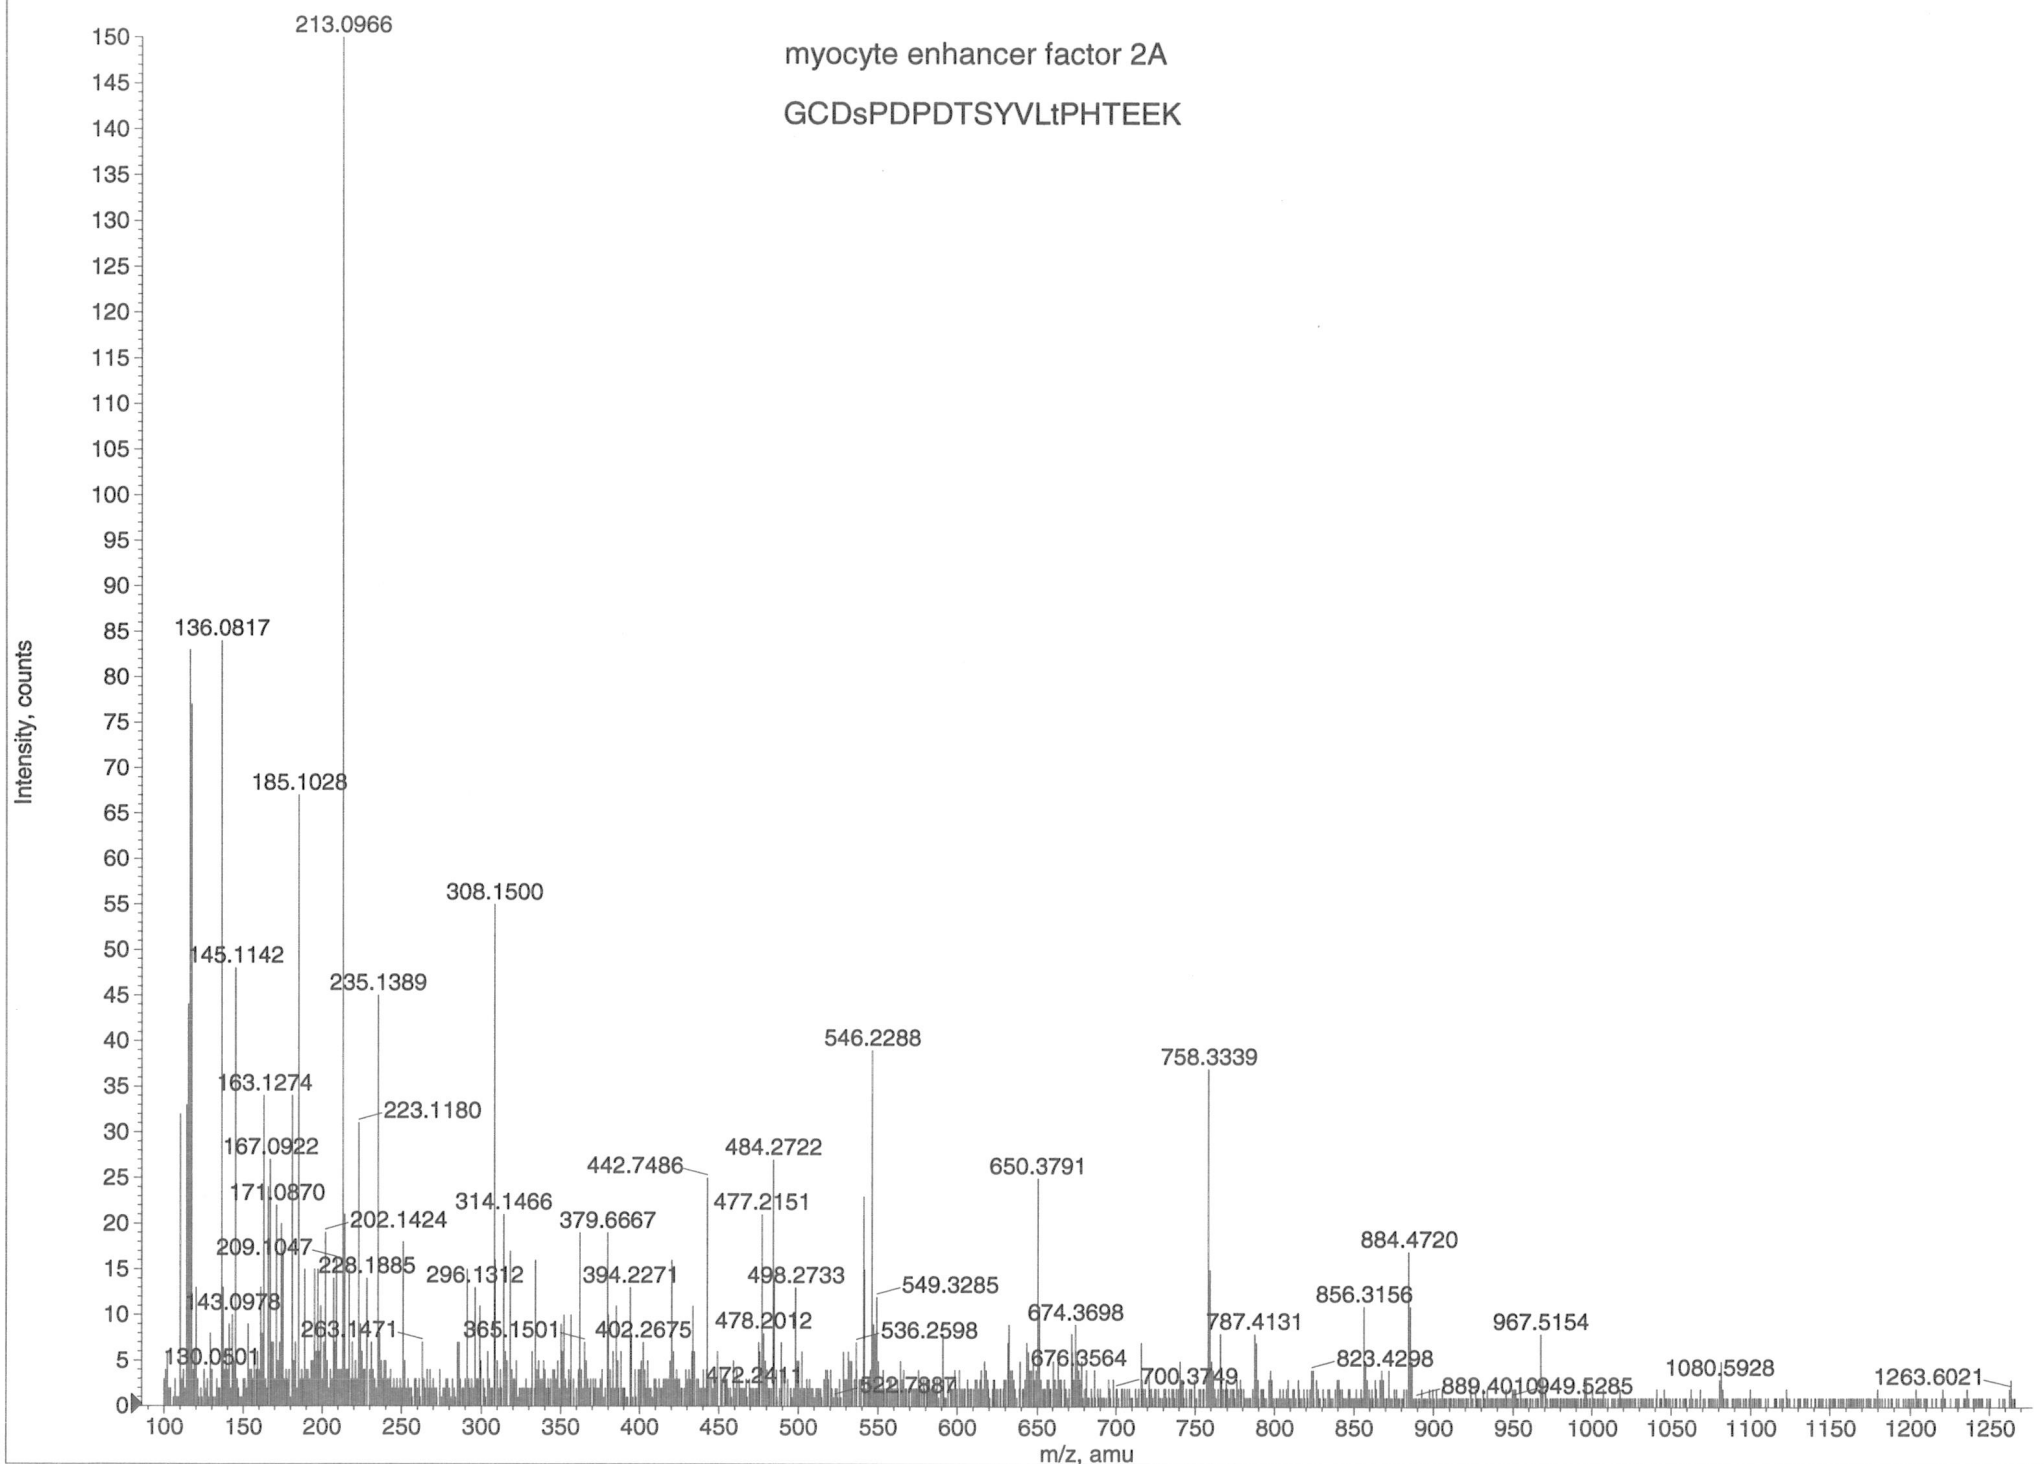

Antigen identified by monoclonal antibody Ki-67  
AAVGEEKDINTFVGtPVEK

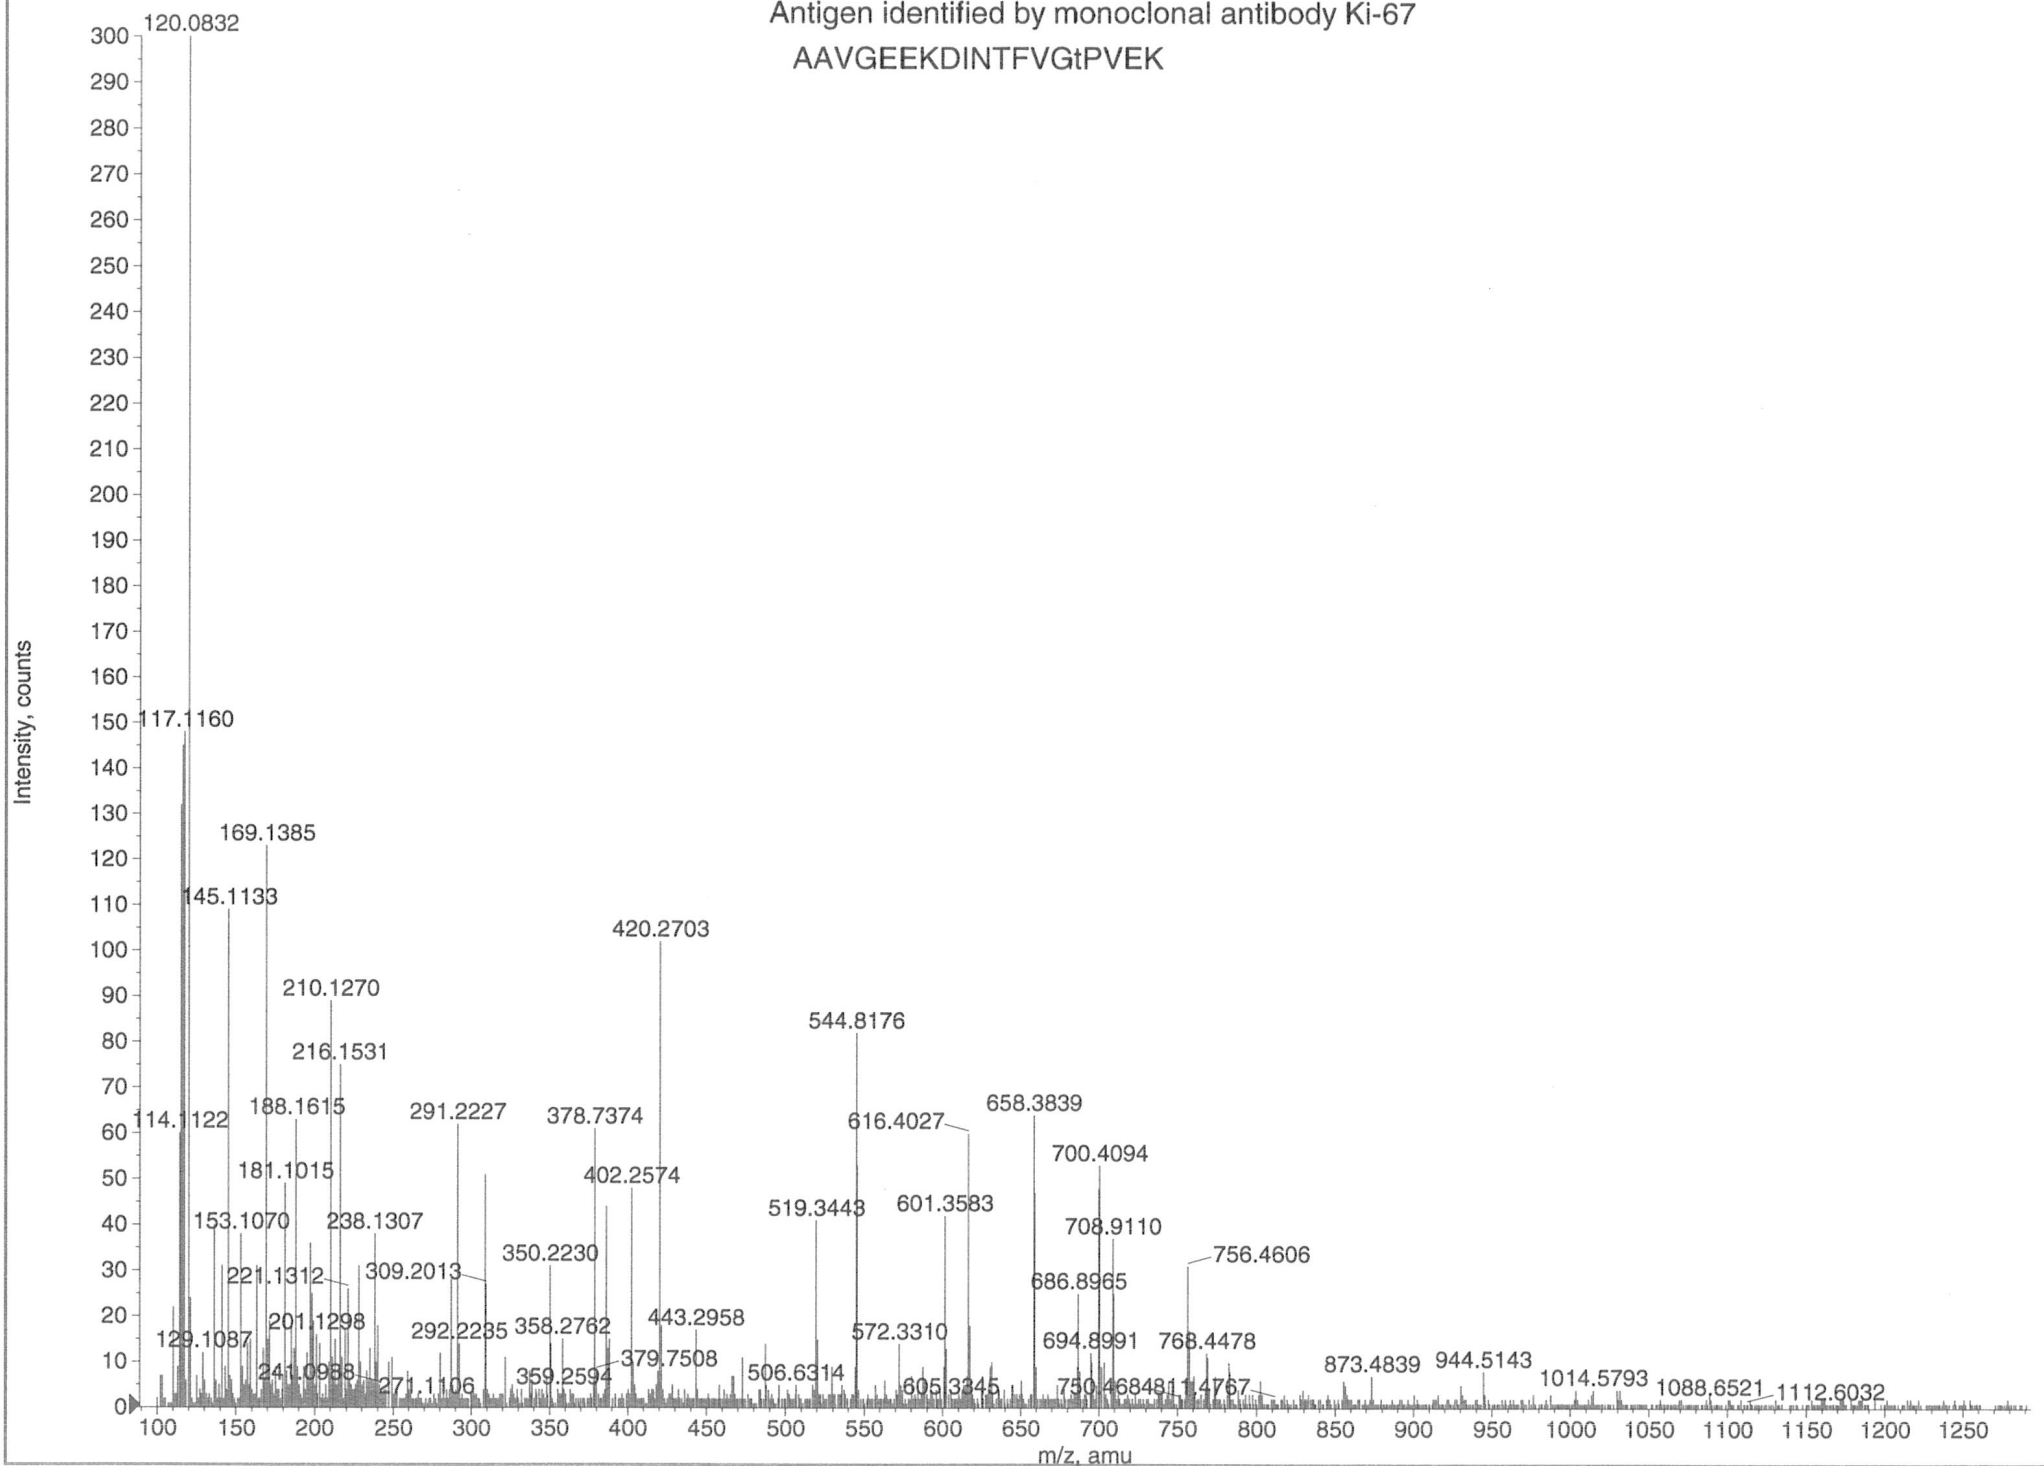

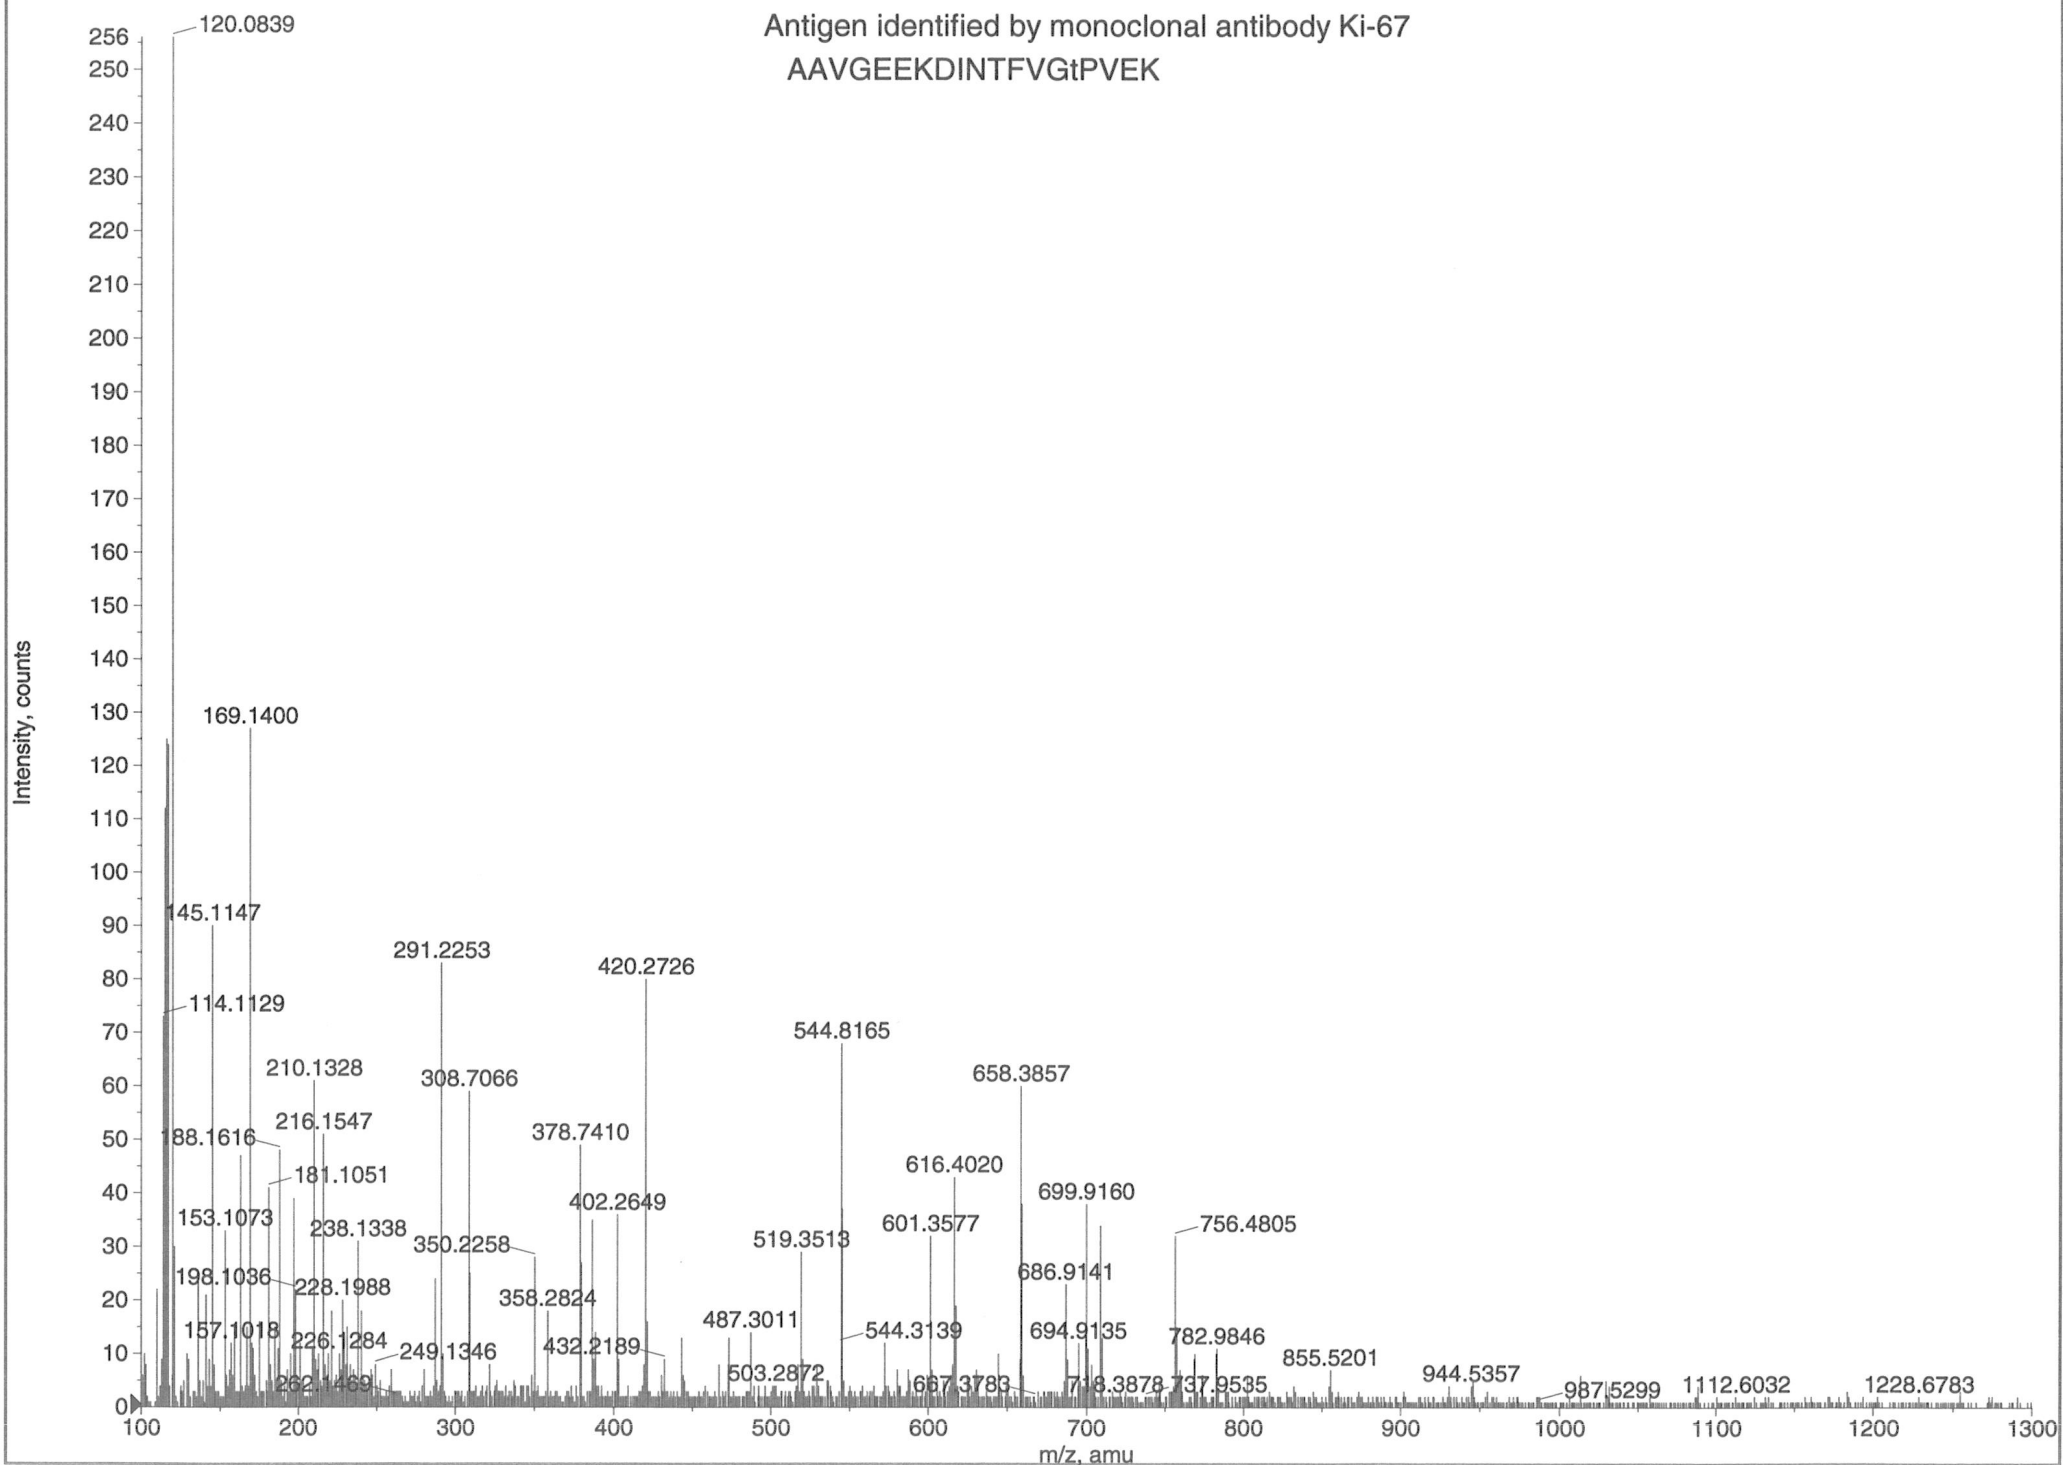

M-phase phosphoprotein 10  
SDLRKsPVFsDEdsDLDFDISKLEQQSK

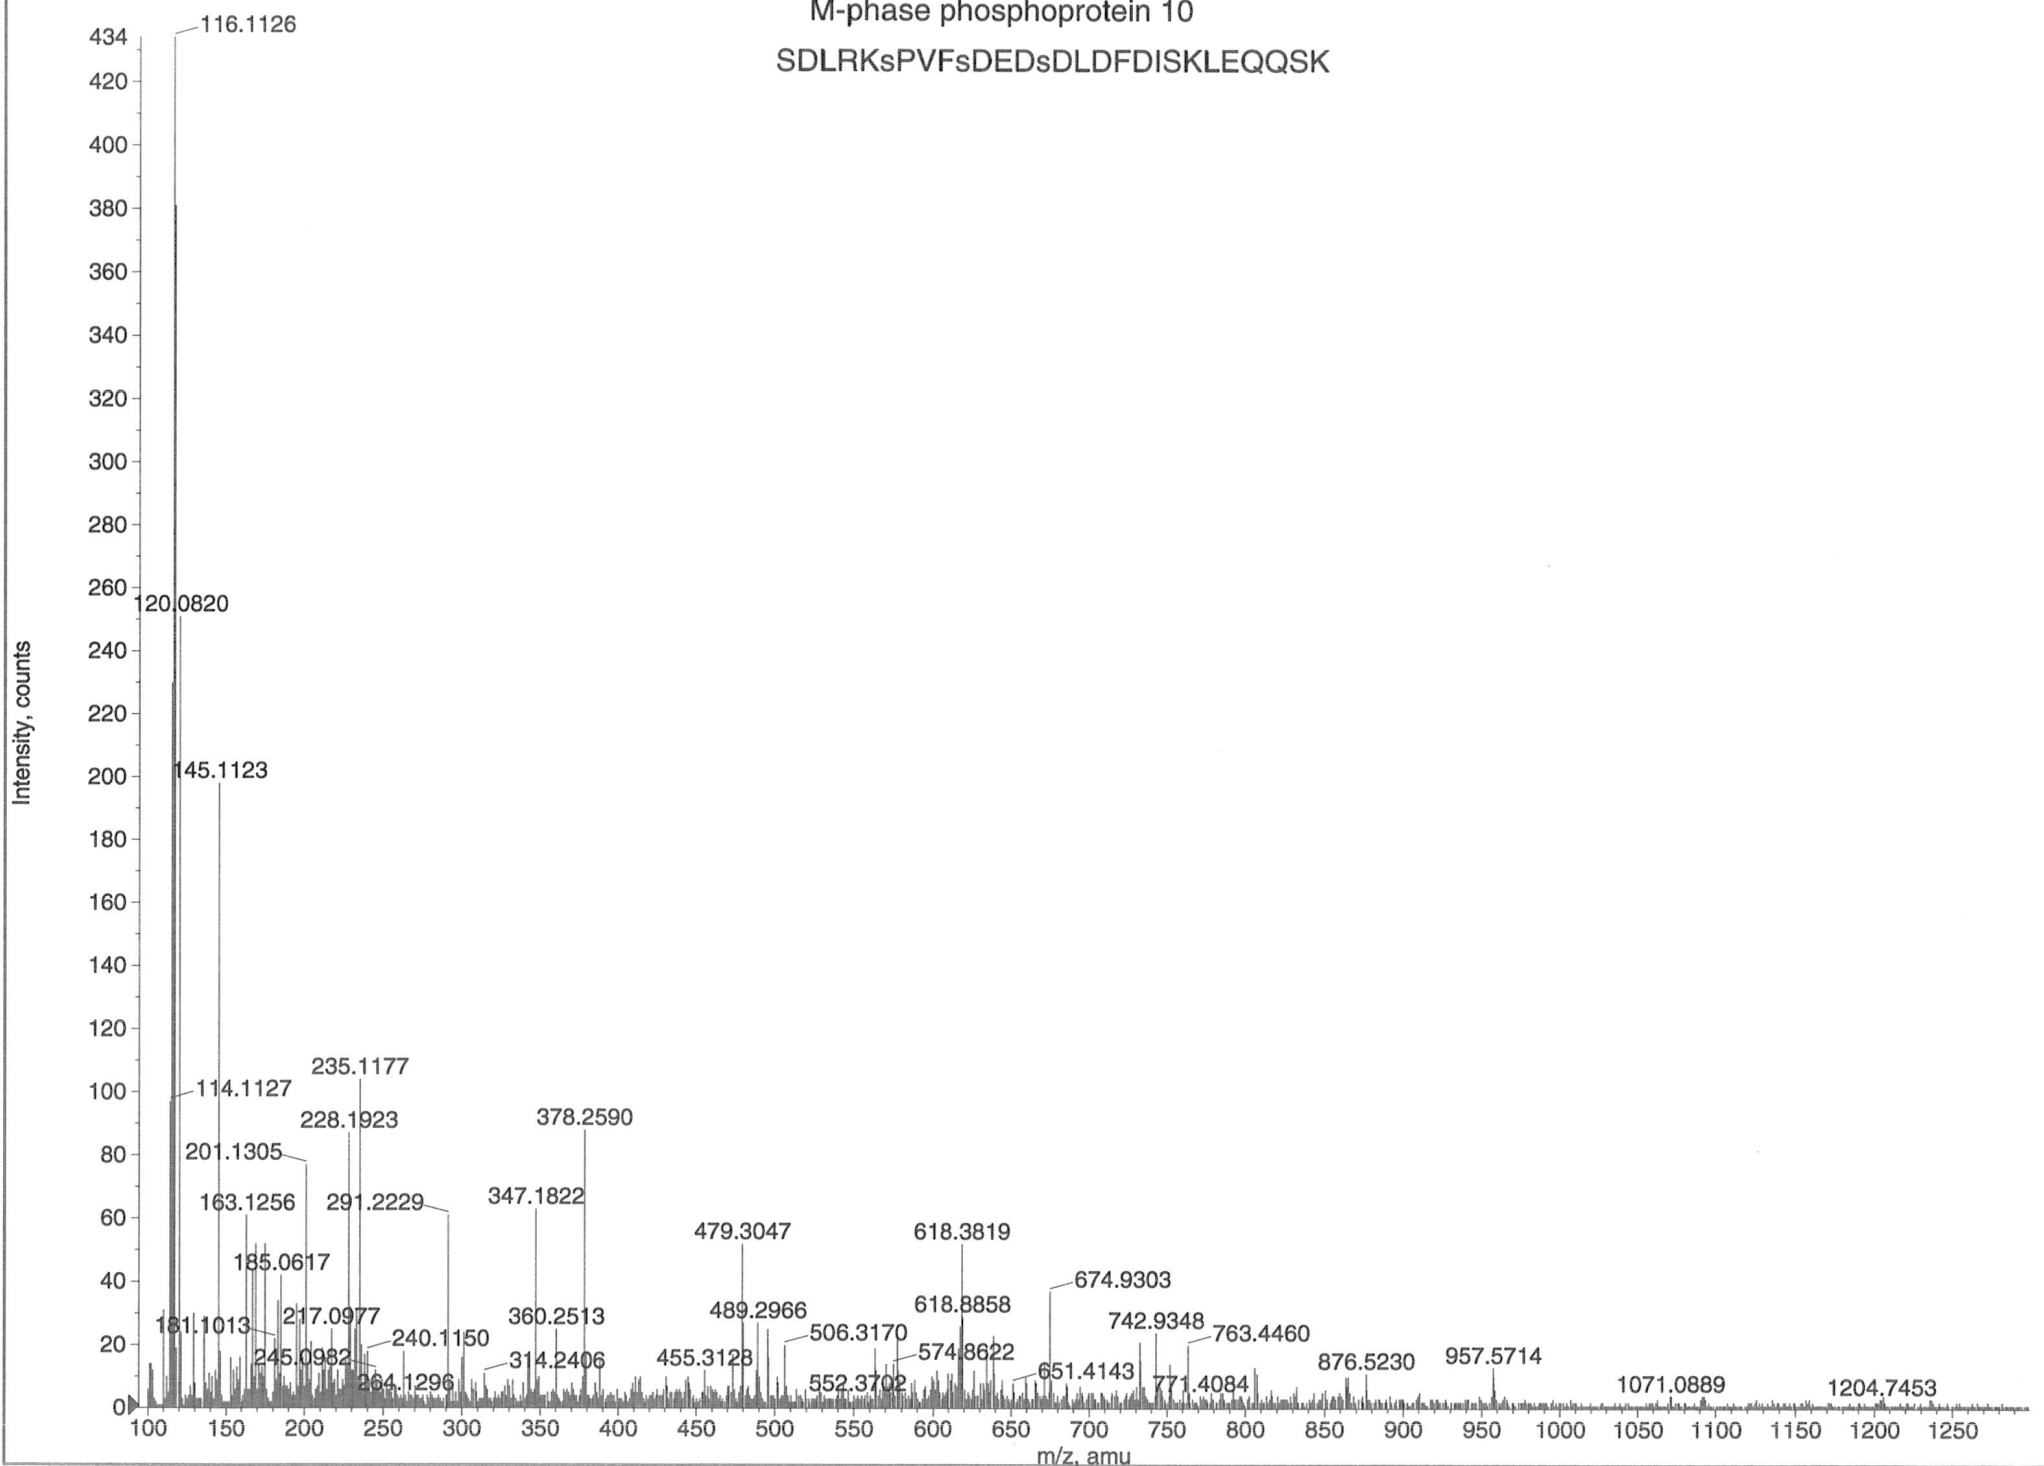



M-phase phosphoprotein 10  
SDLRKsPVFsDEdsDLDFDISKLEQQSK

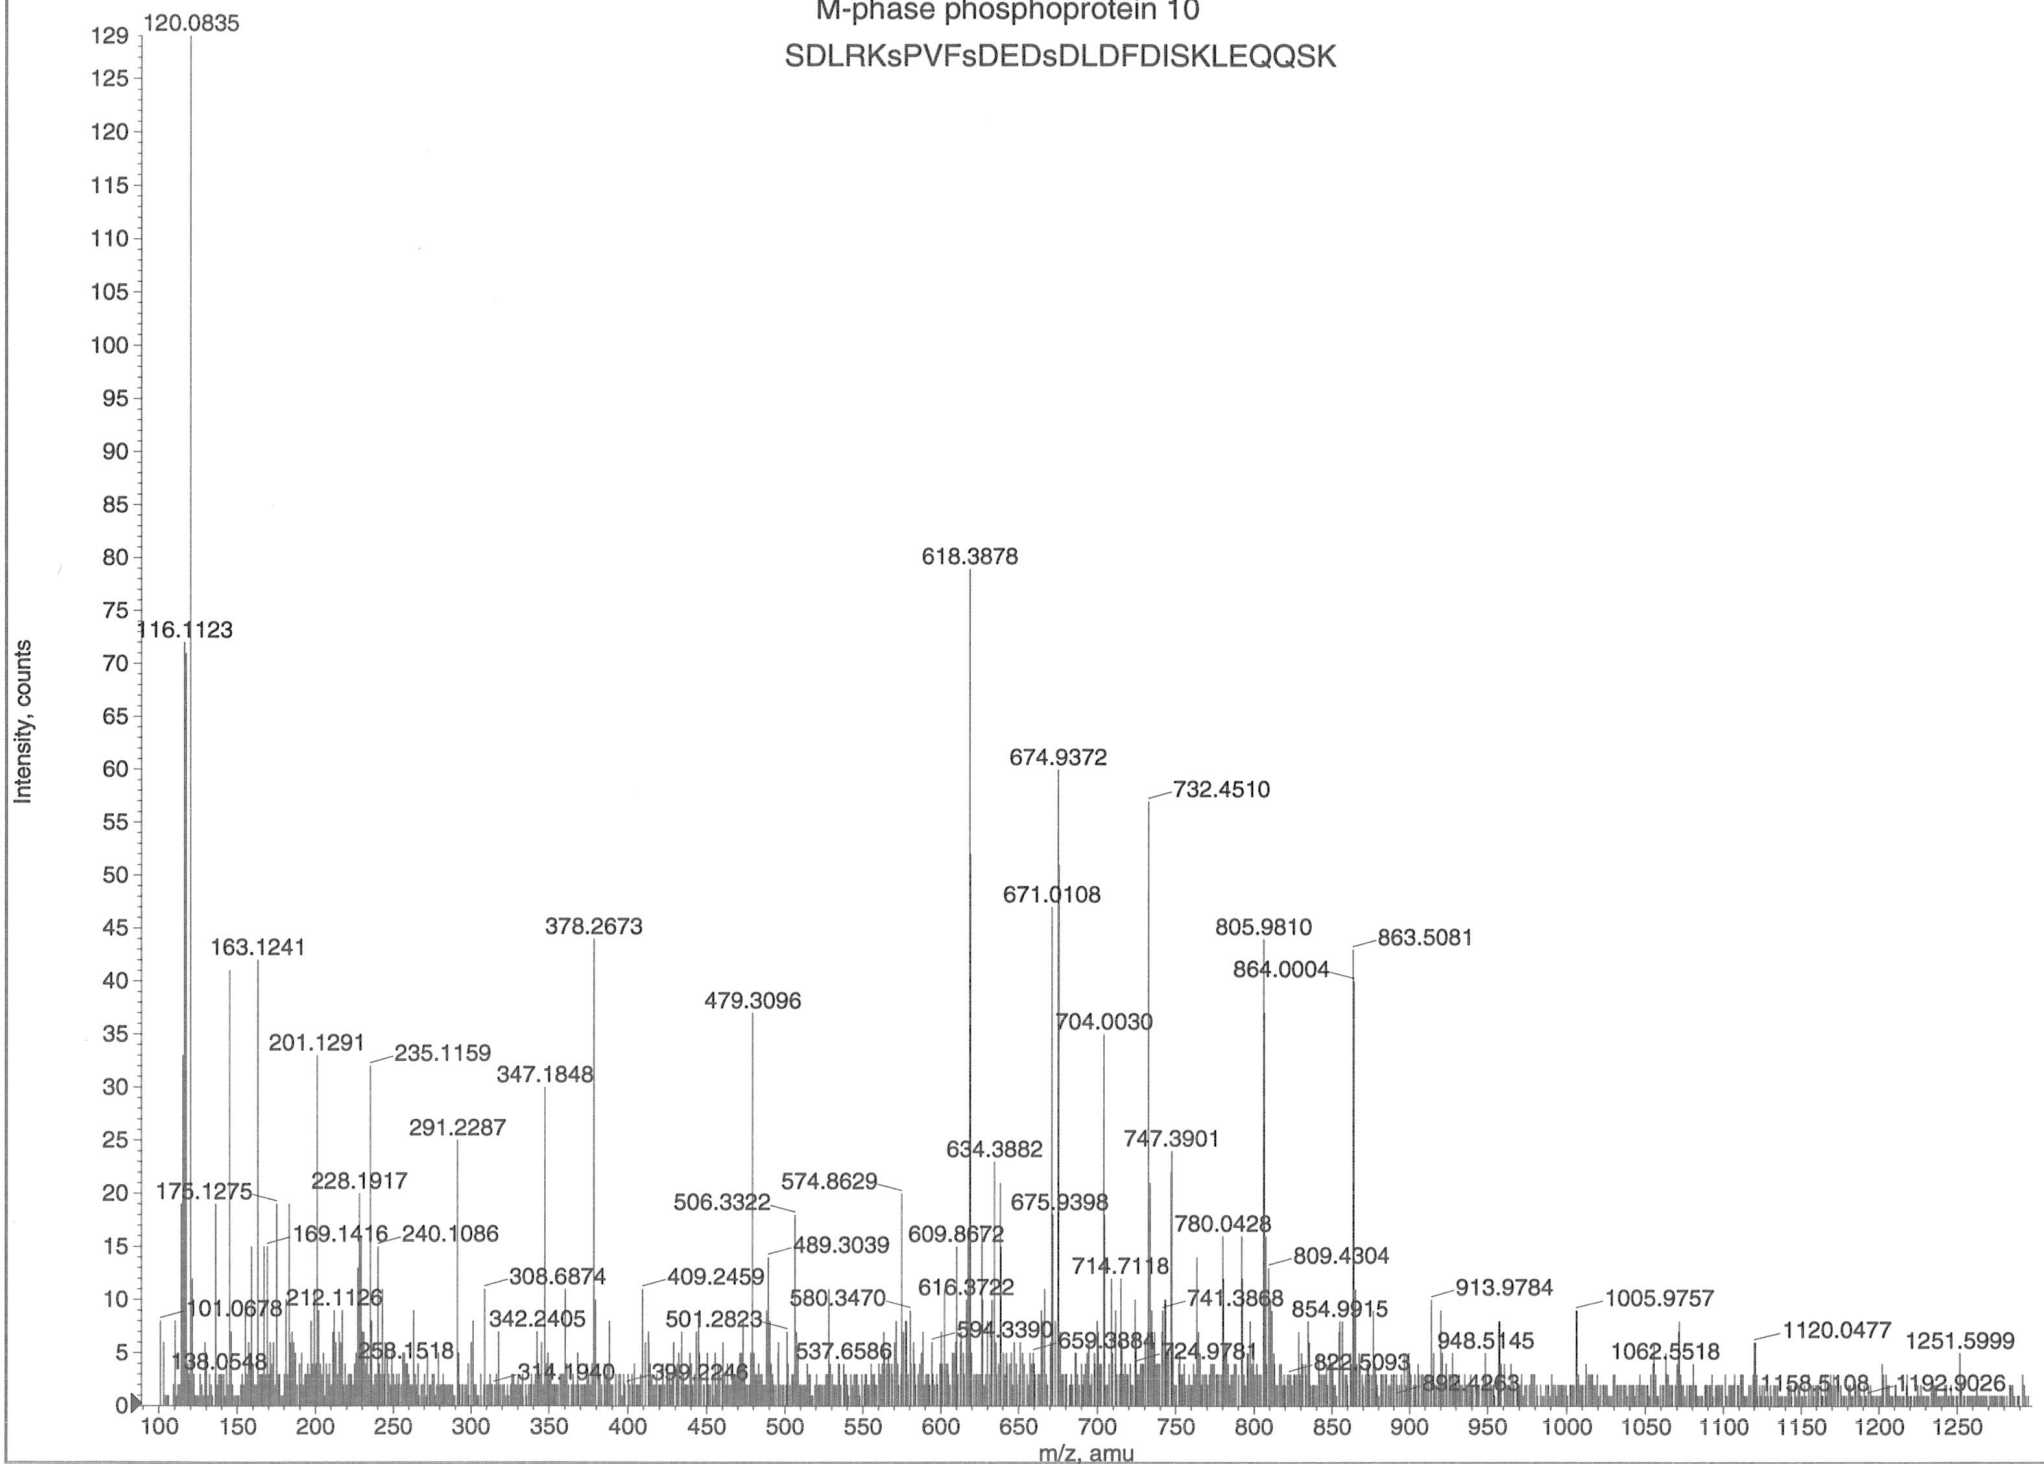

M-phase phosphoprotein 6  
DHANYEEDENGDIPIK

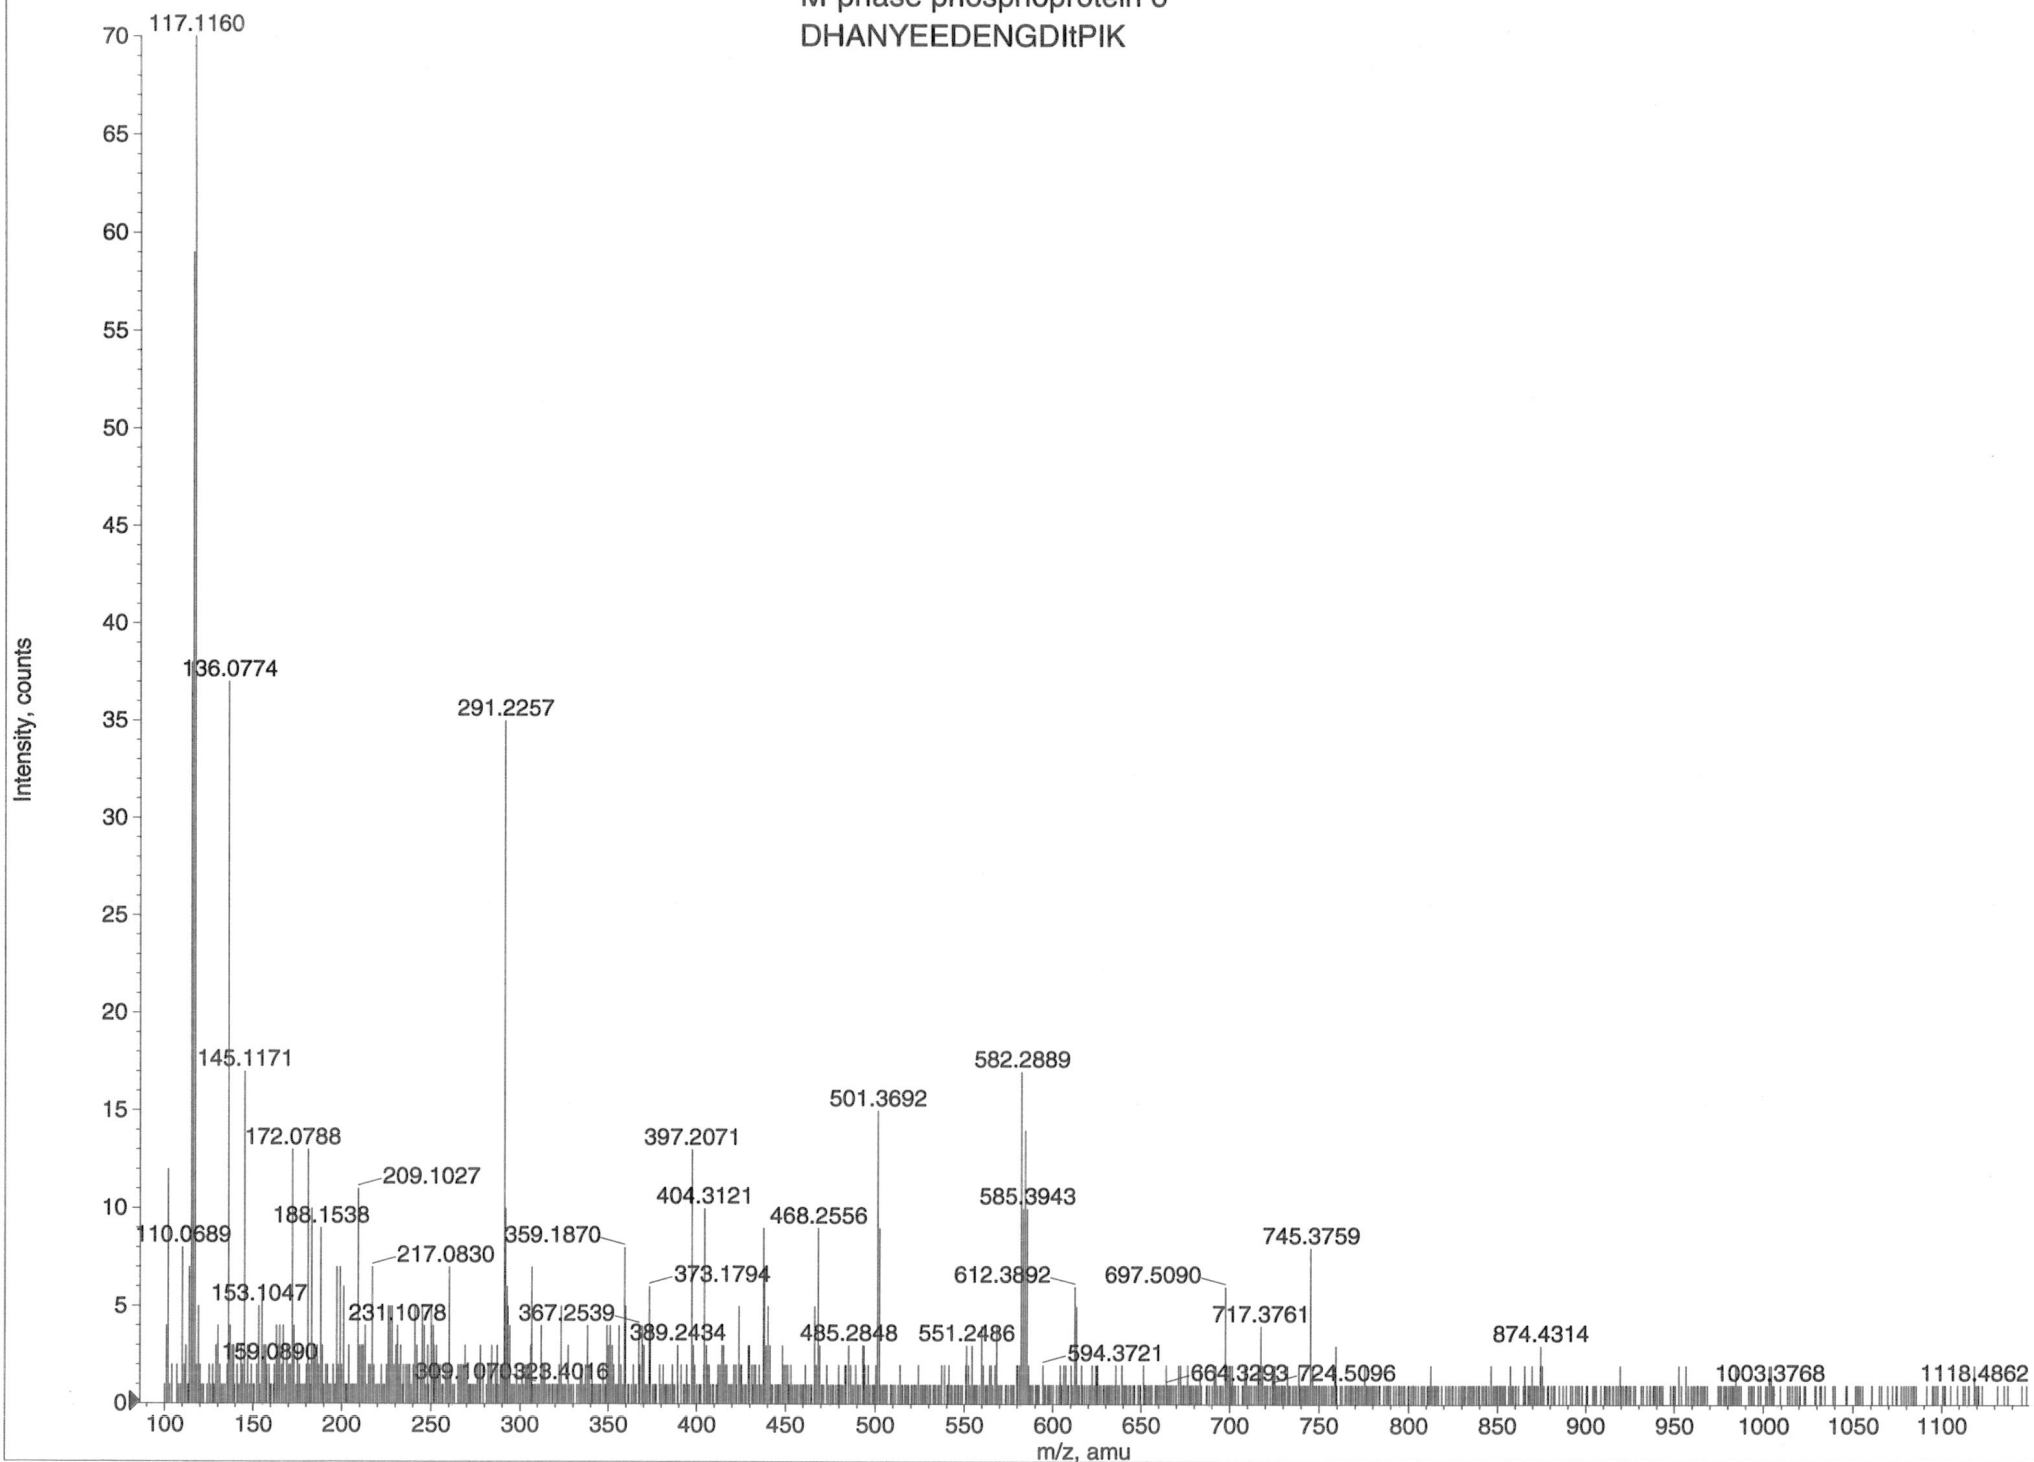

M-phase phosphoprotein 6  
DHANYEEDENGDIPIK

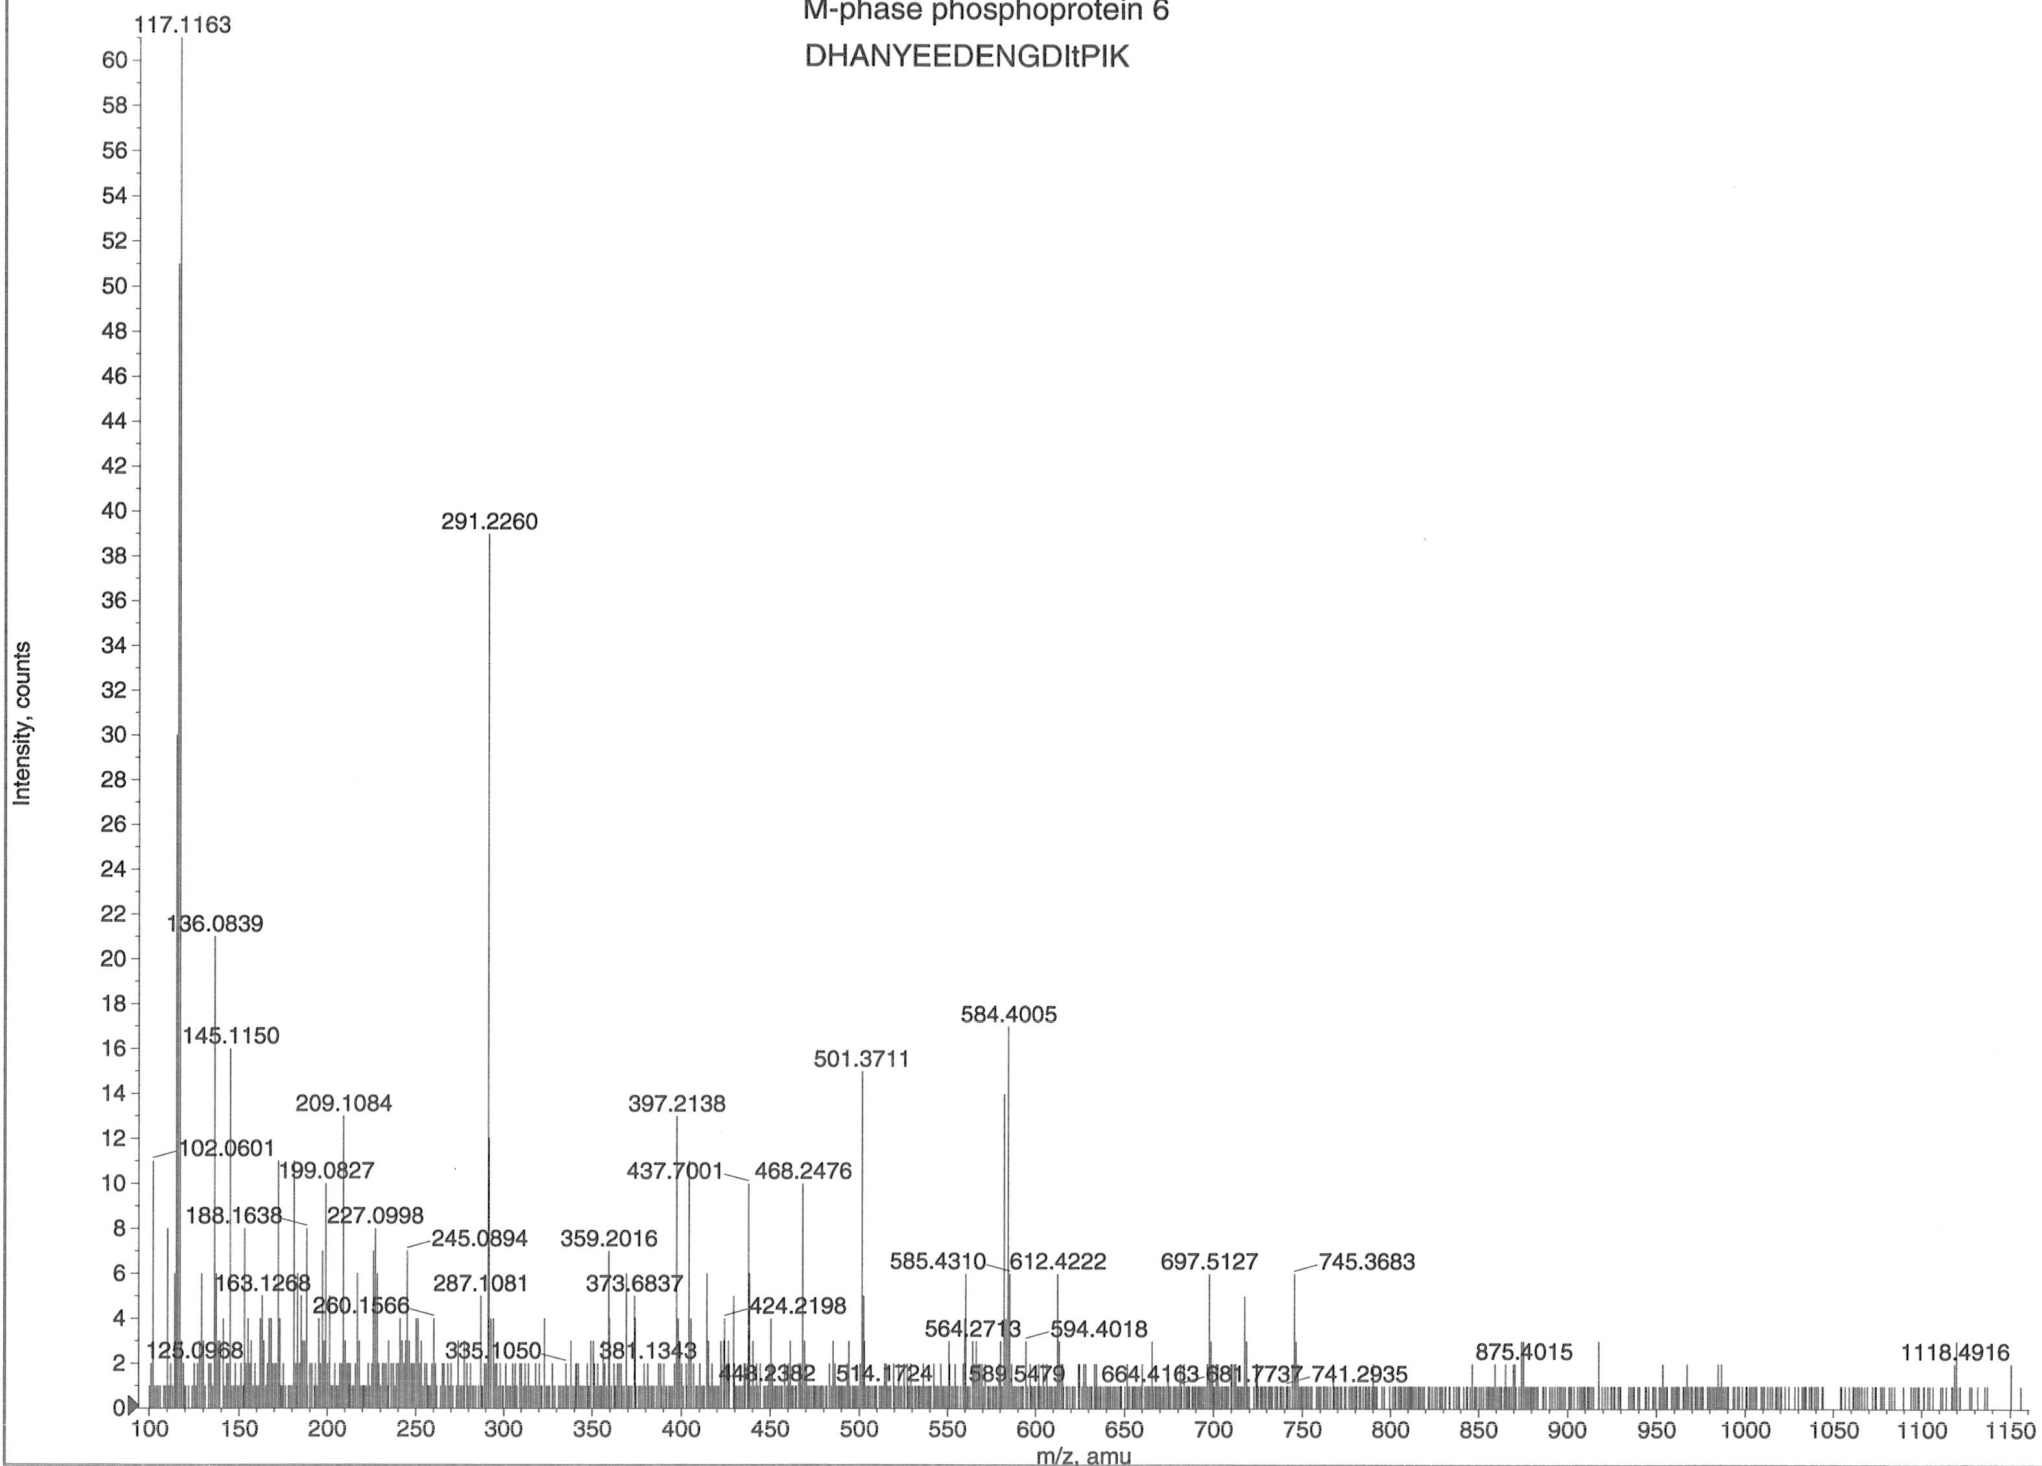

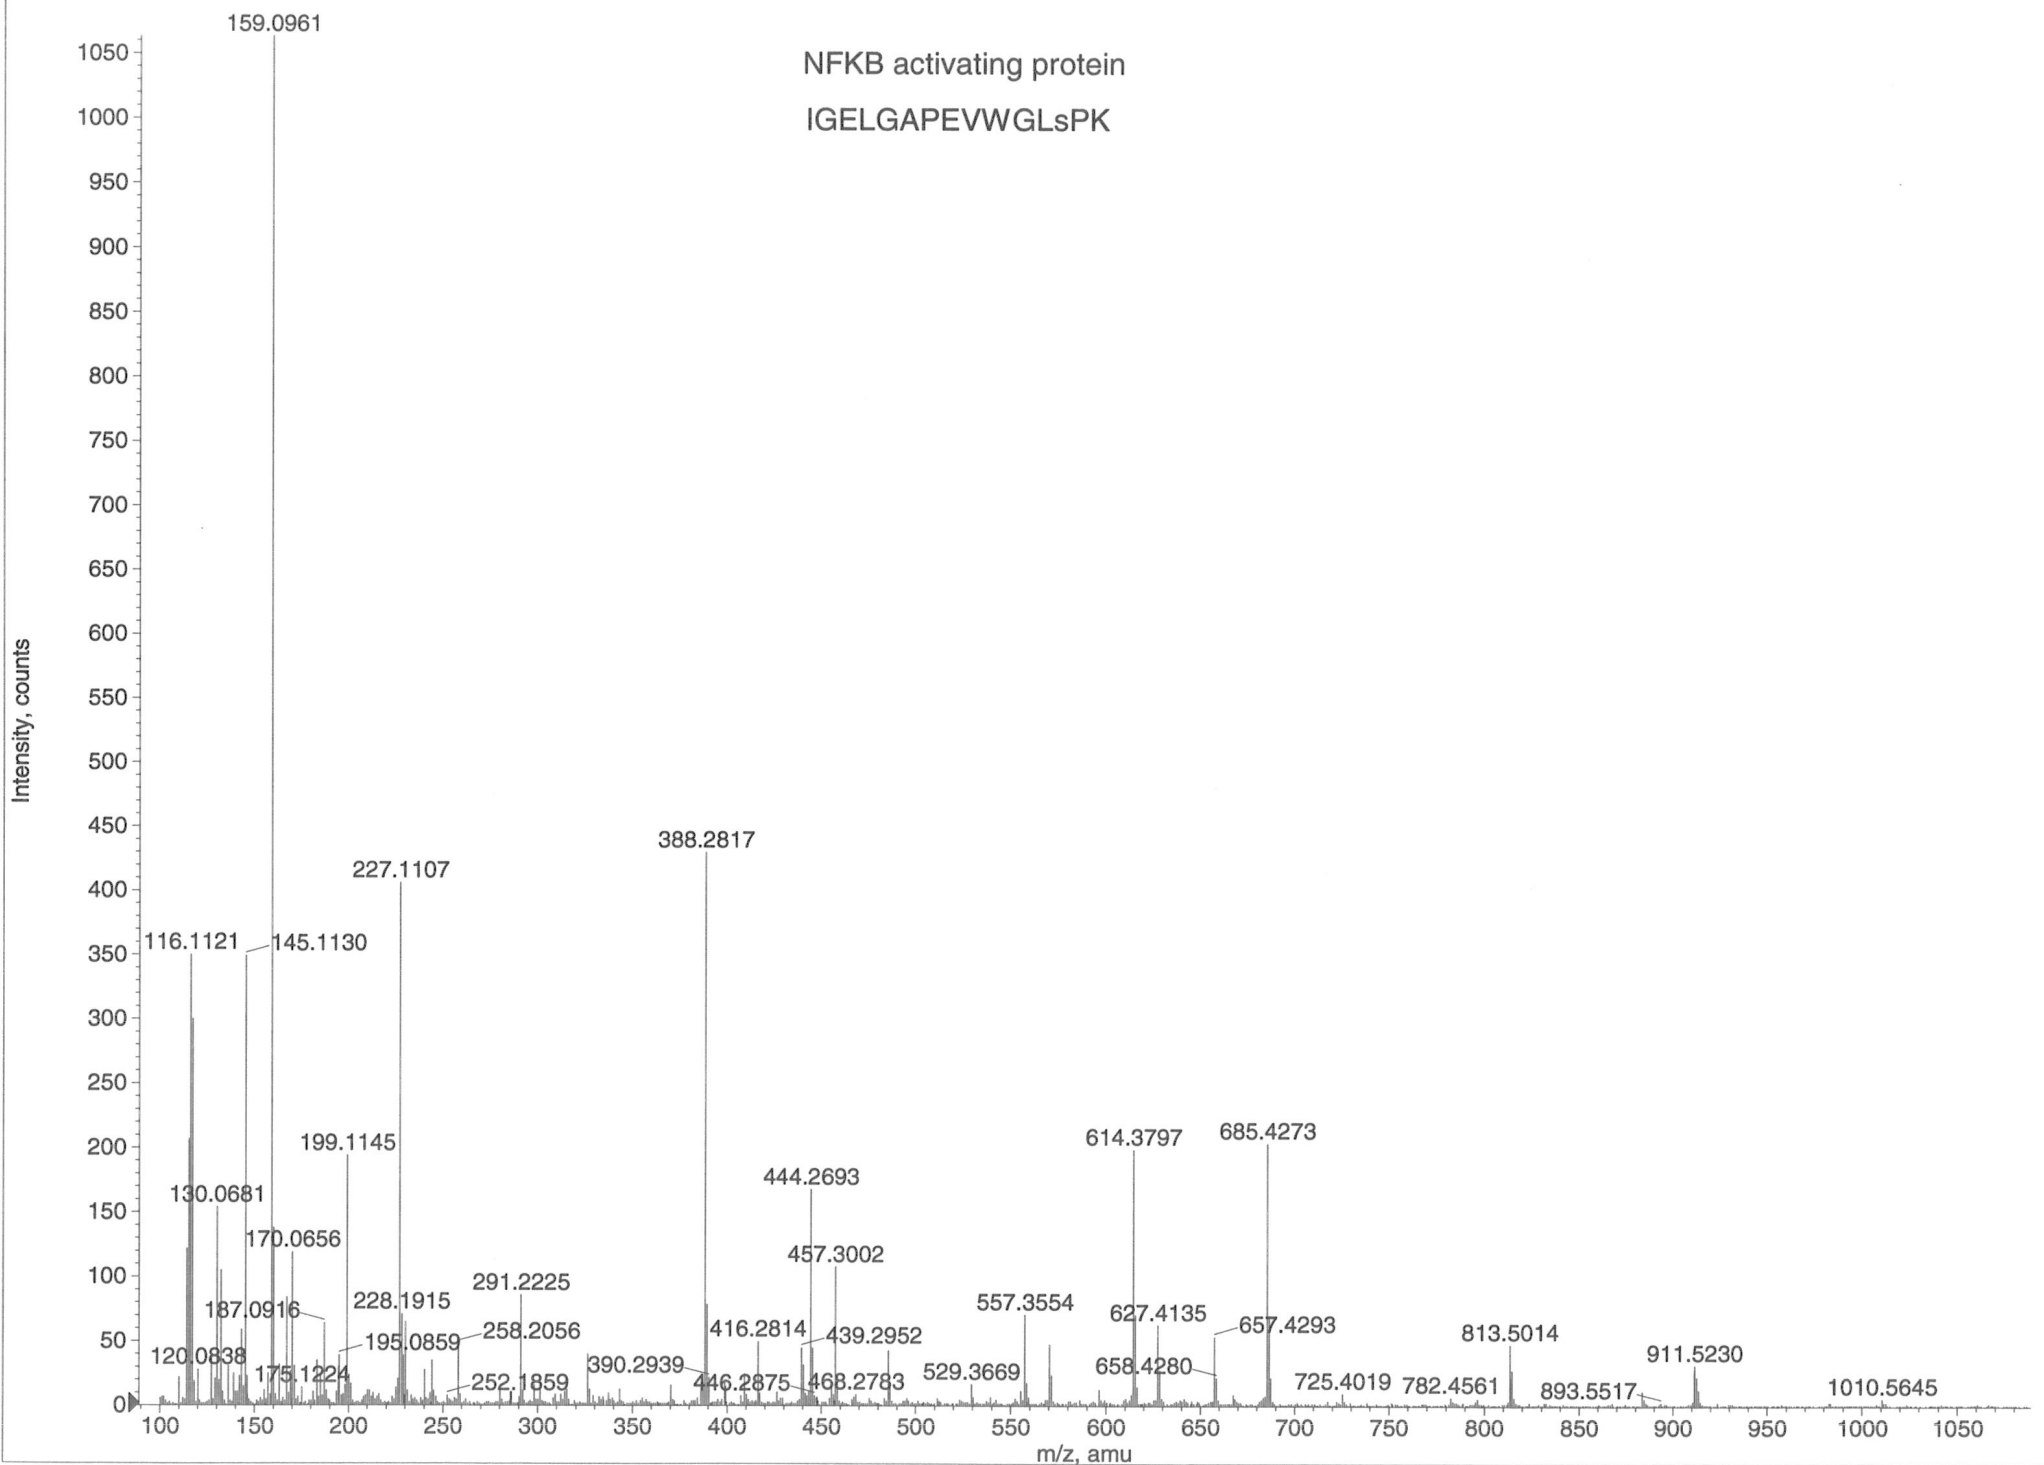

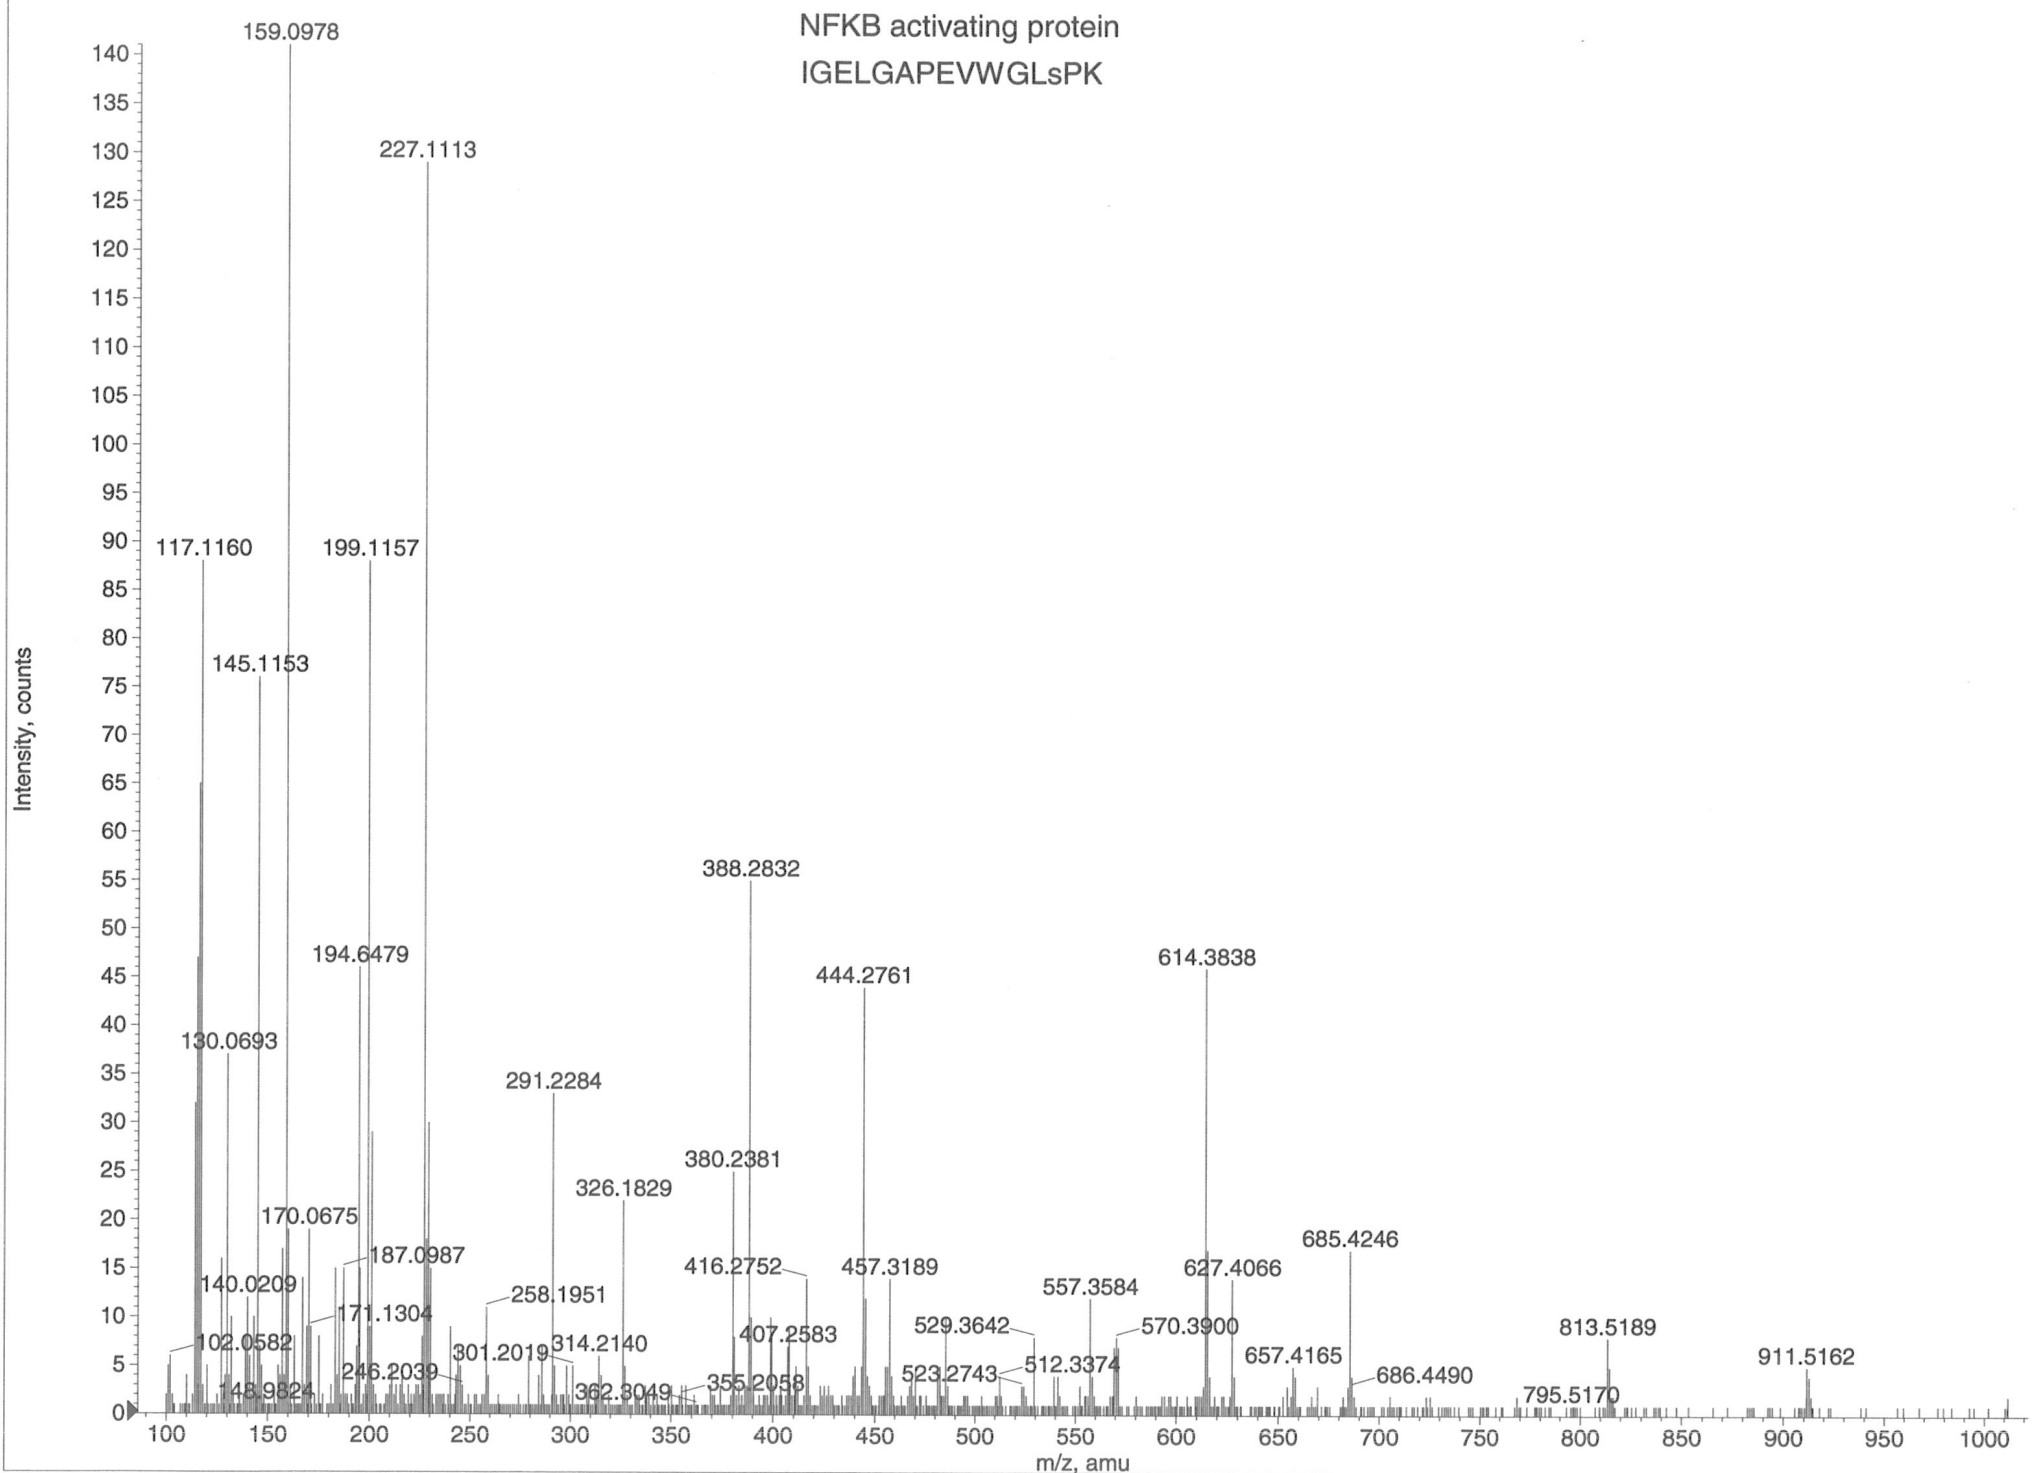

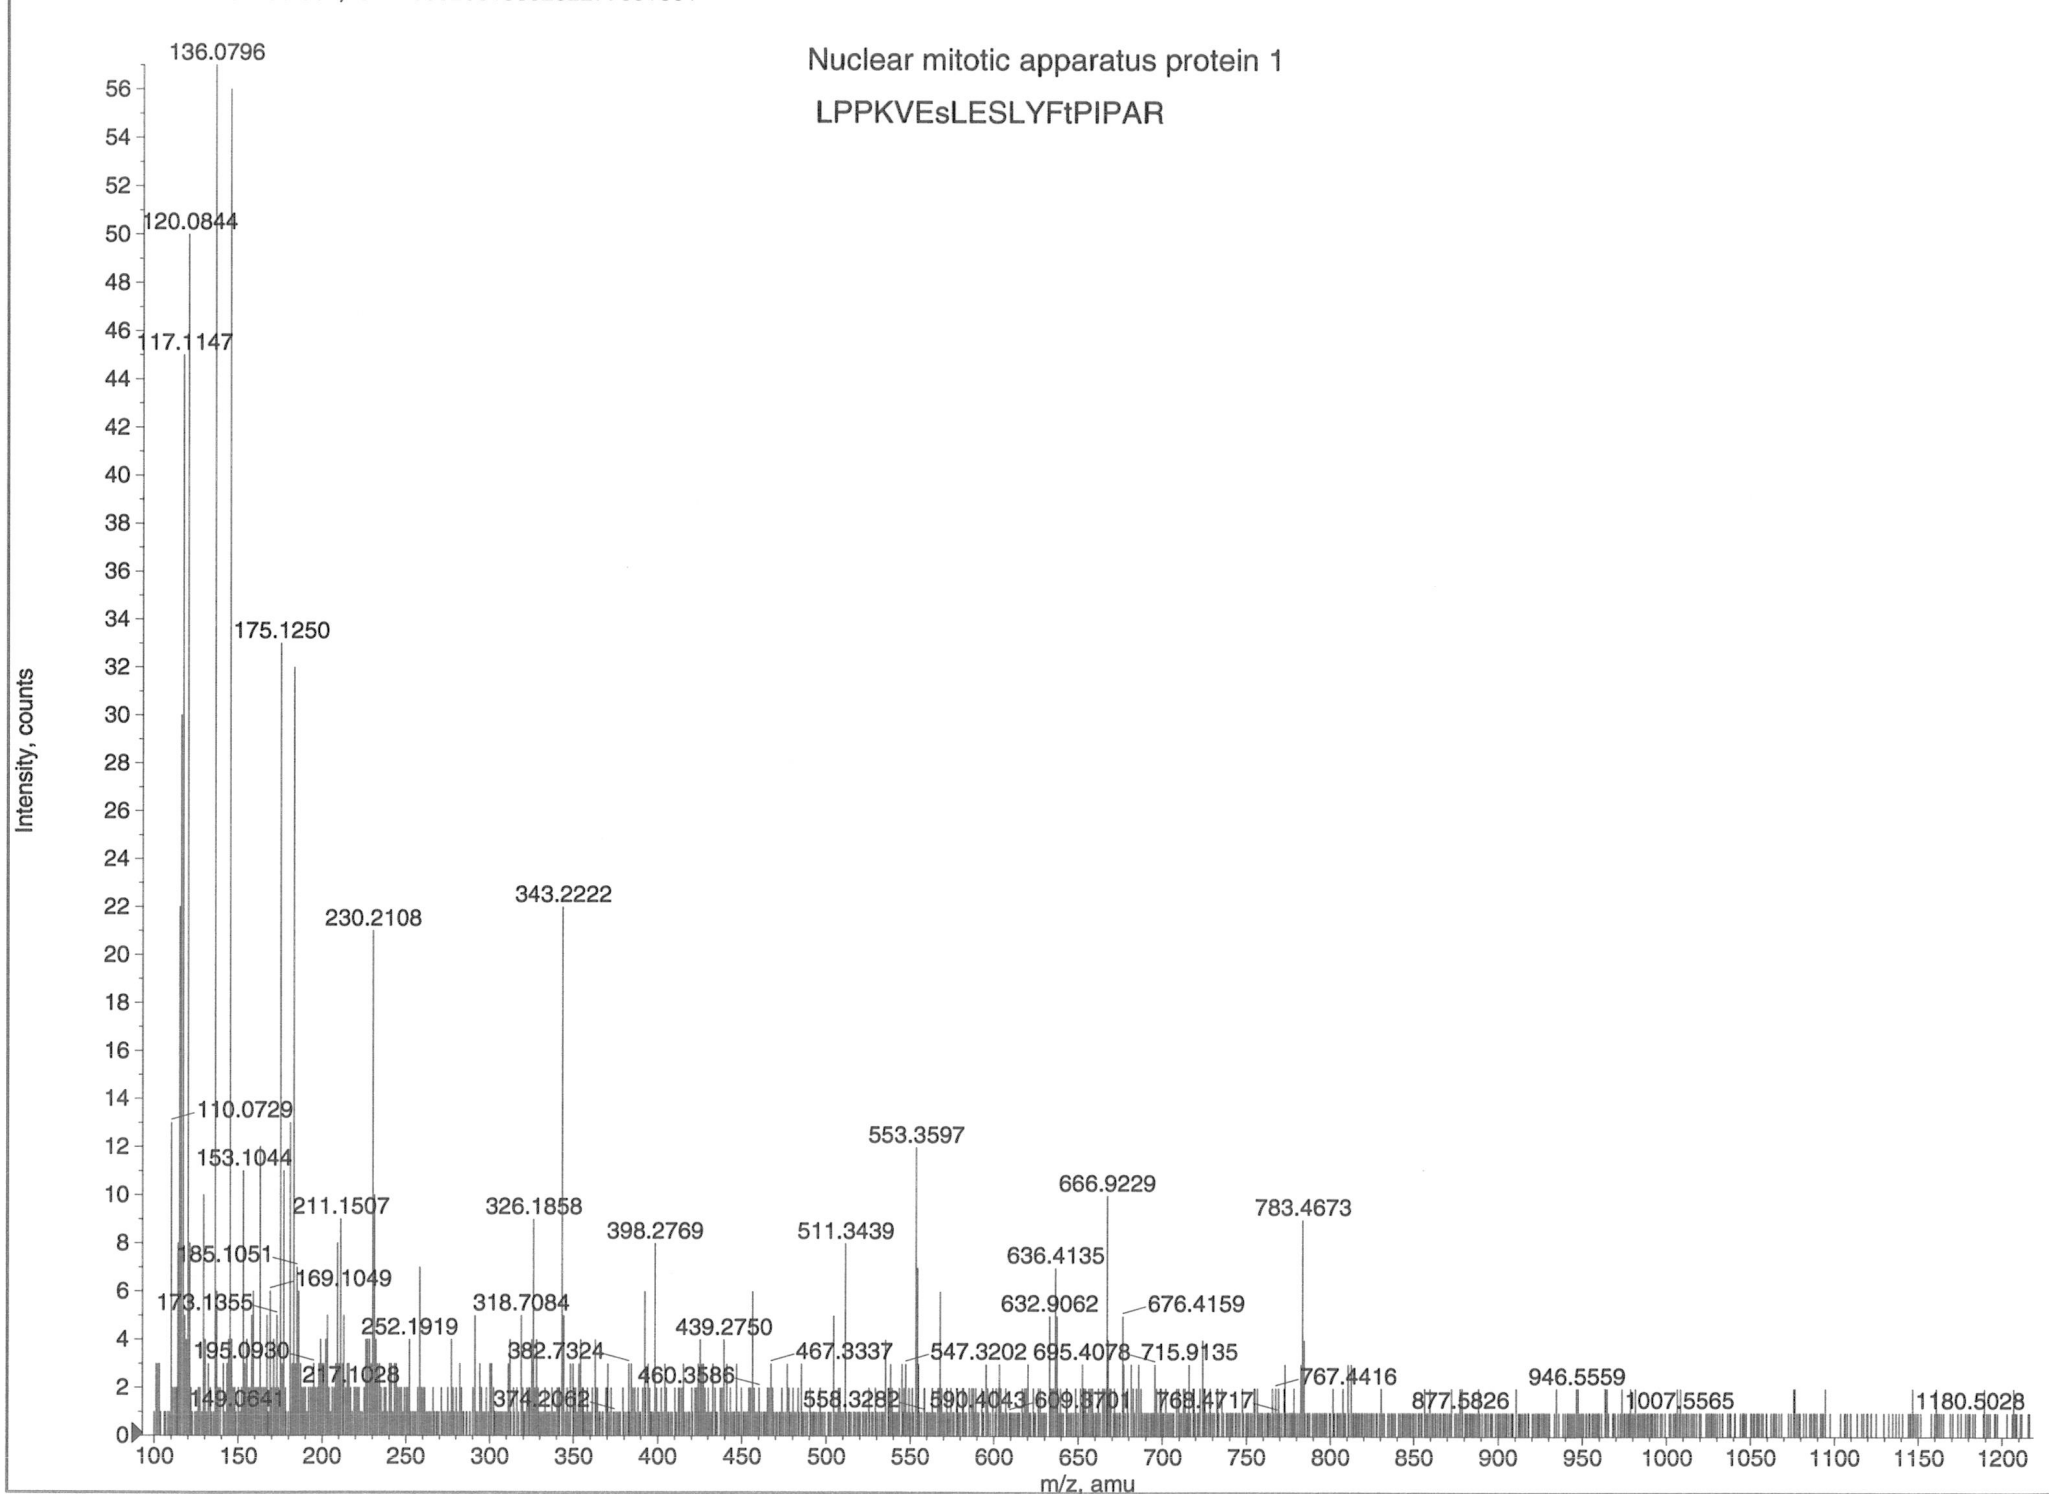

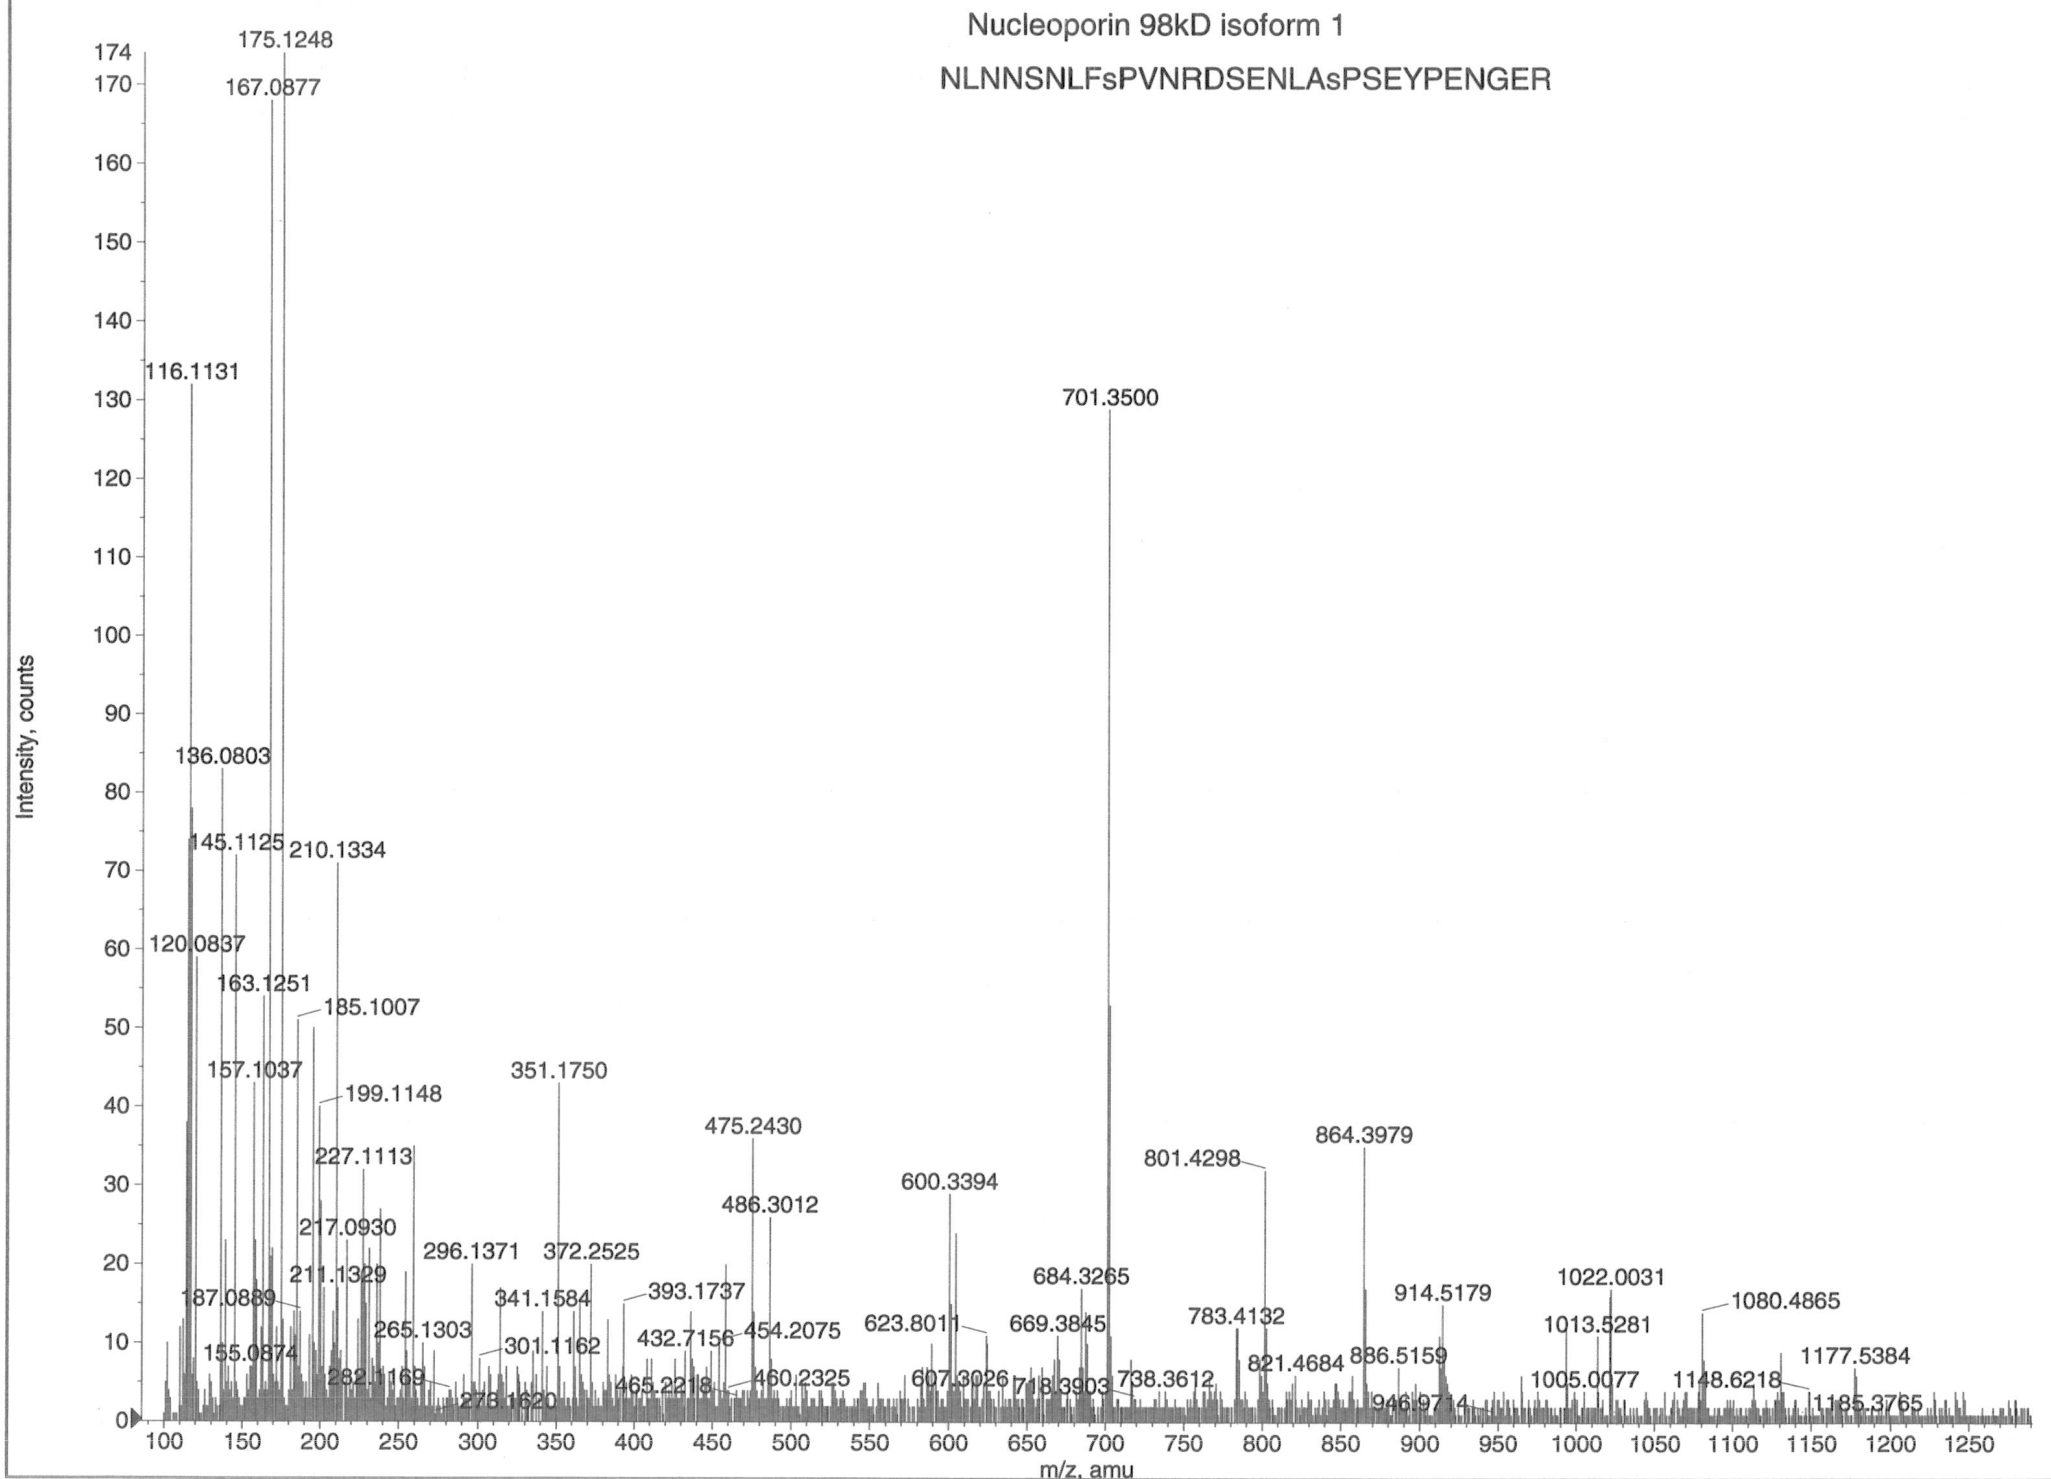

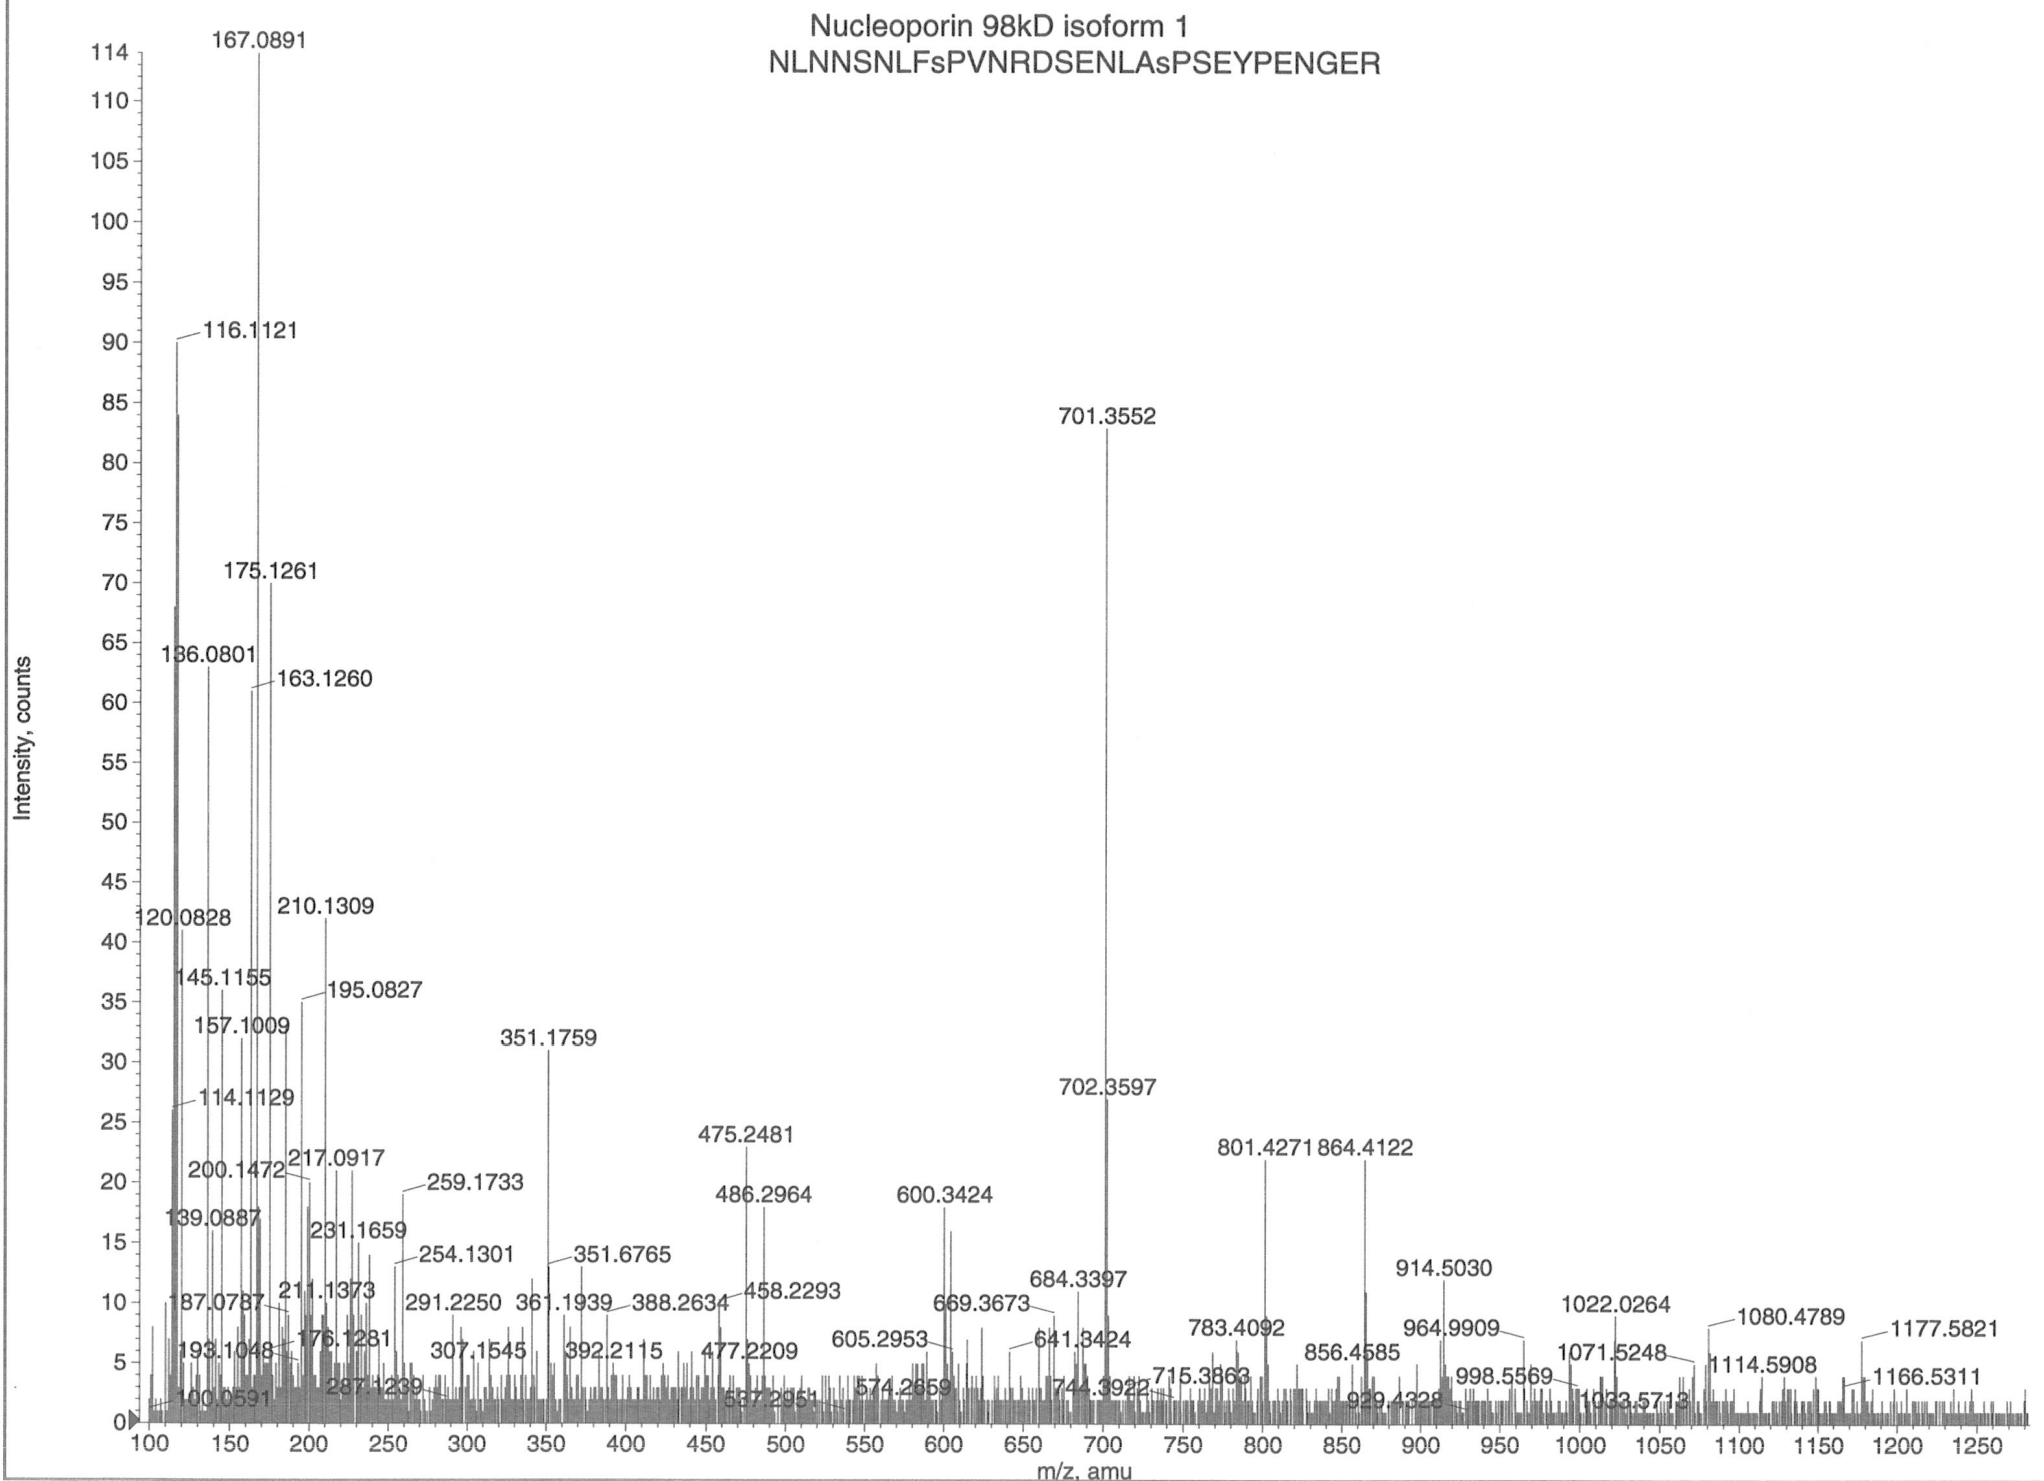



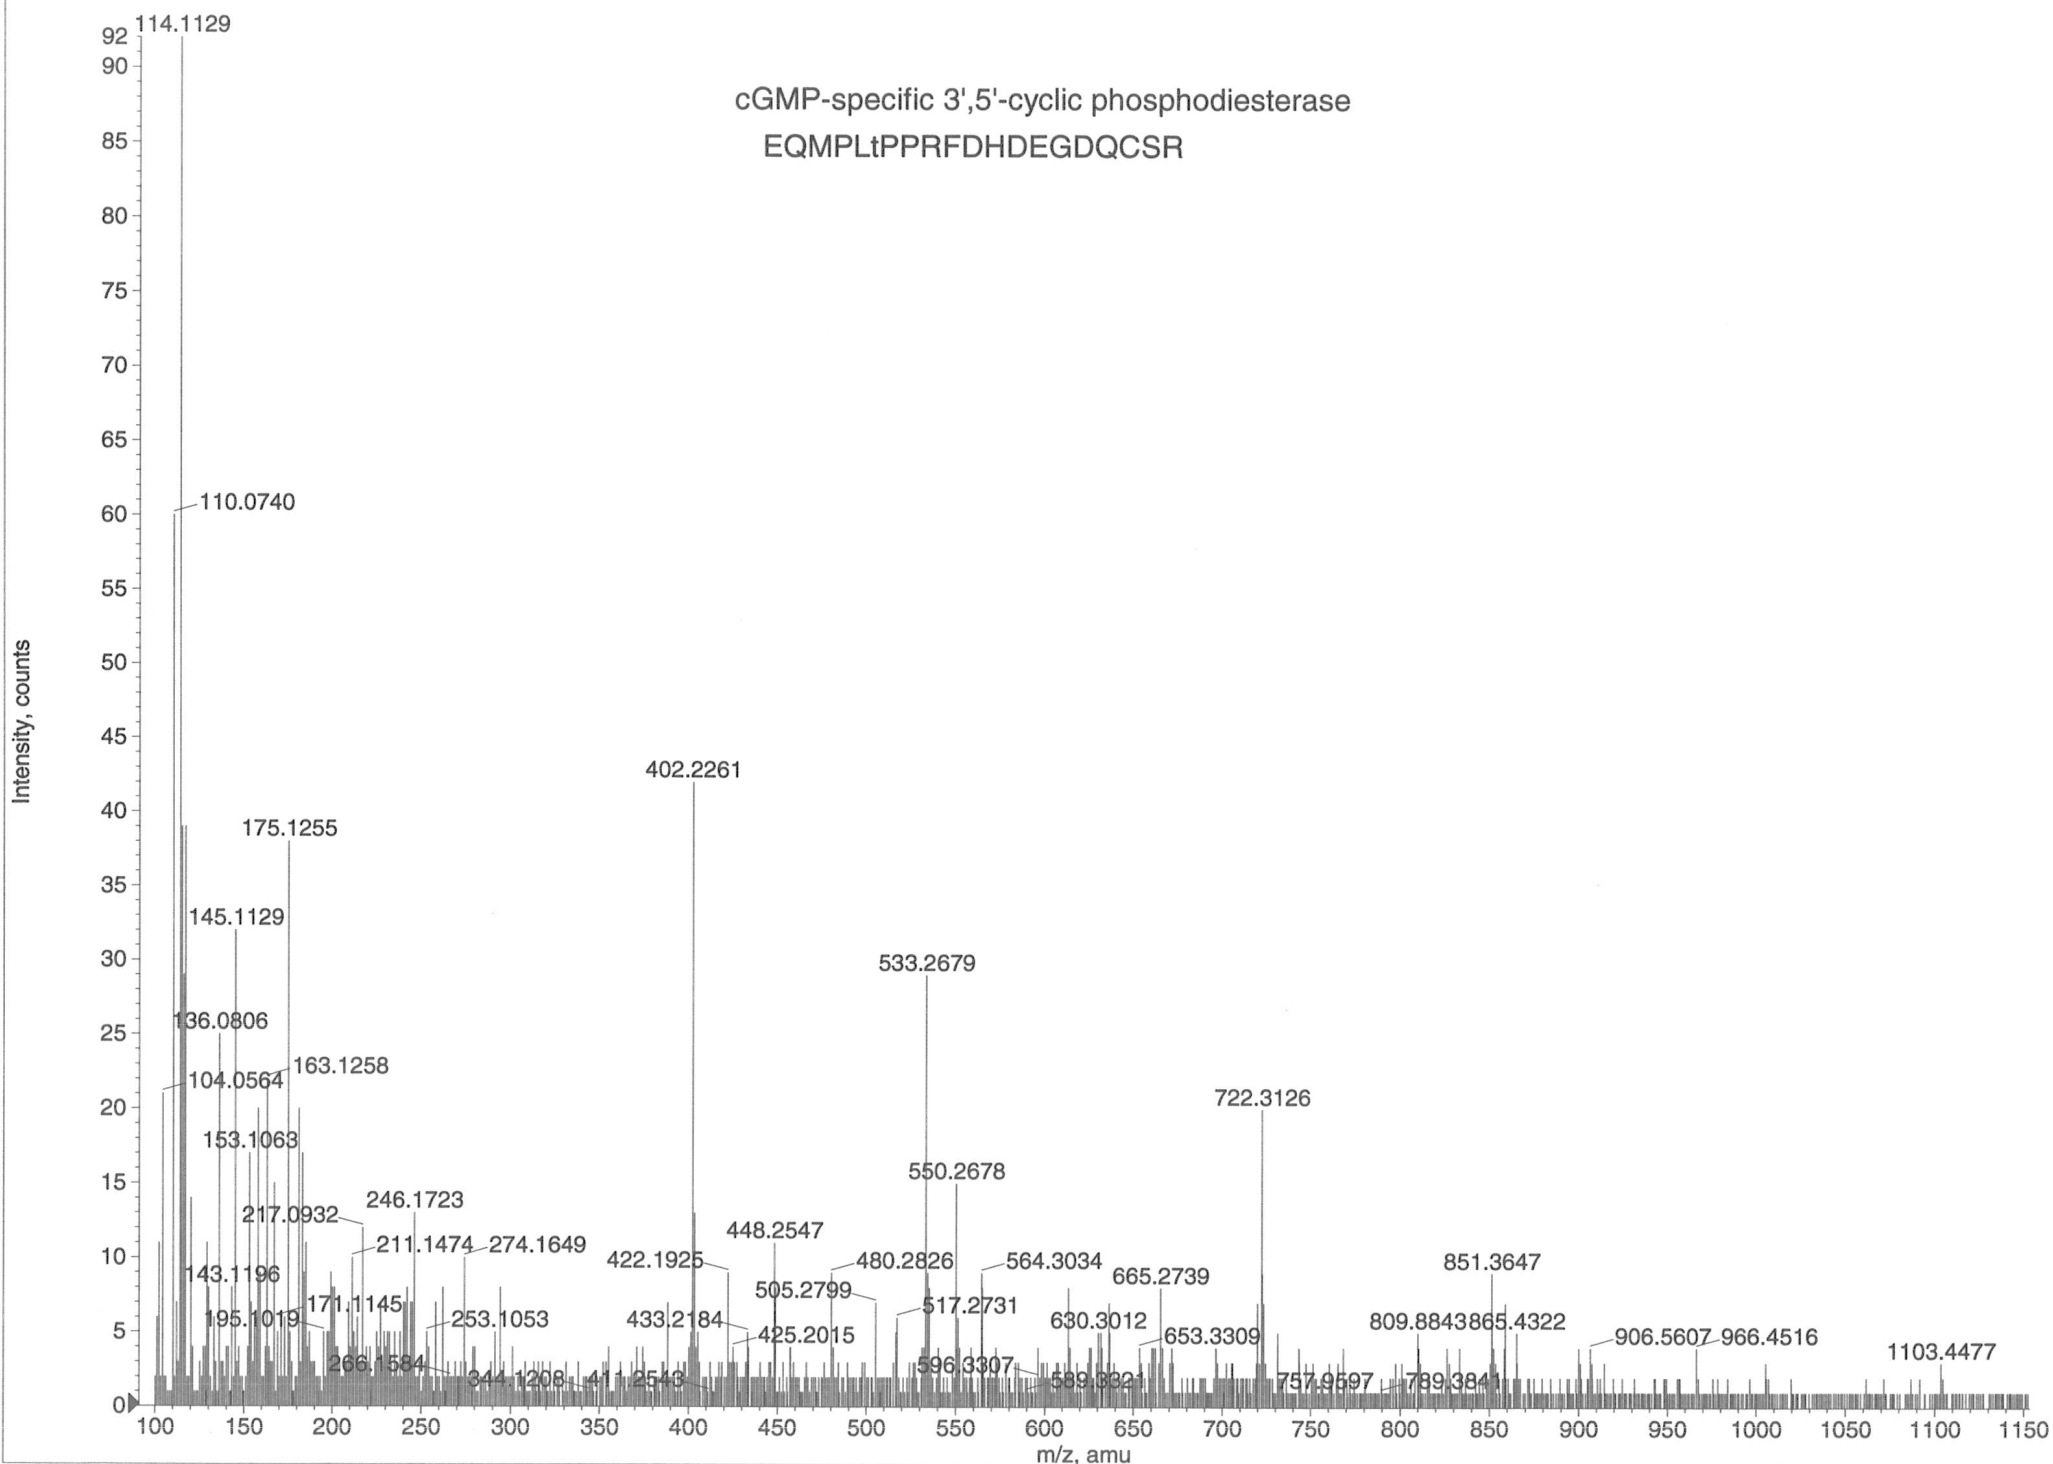

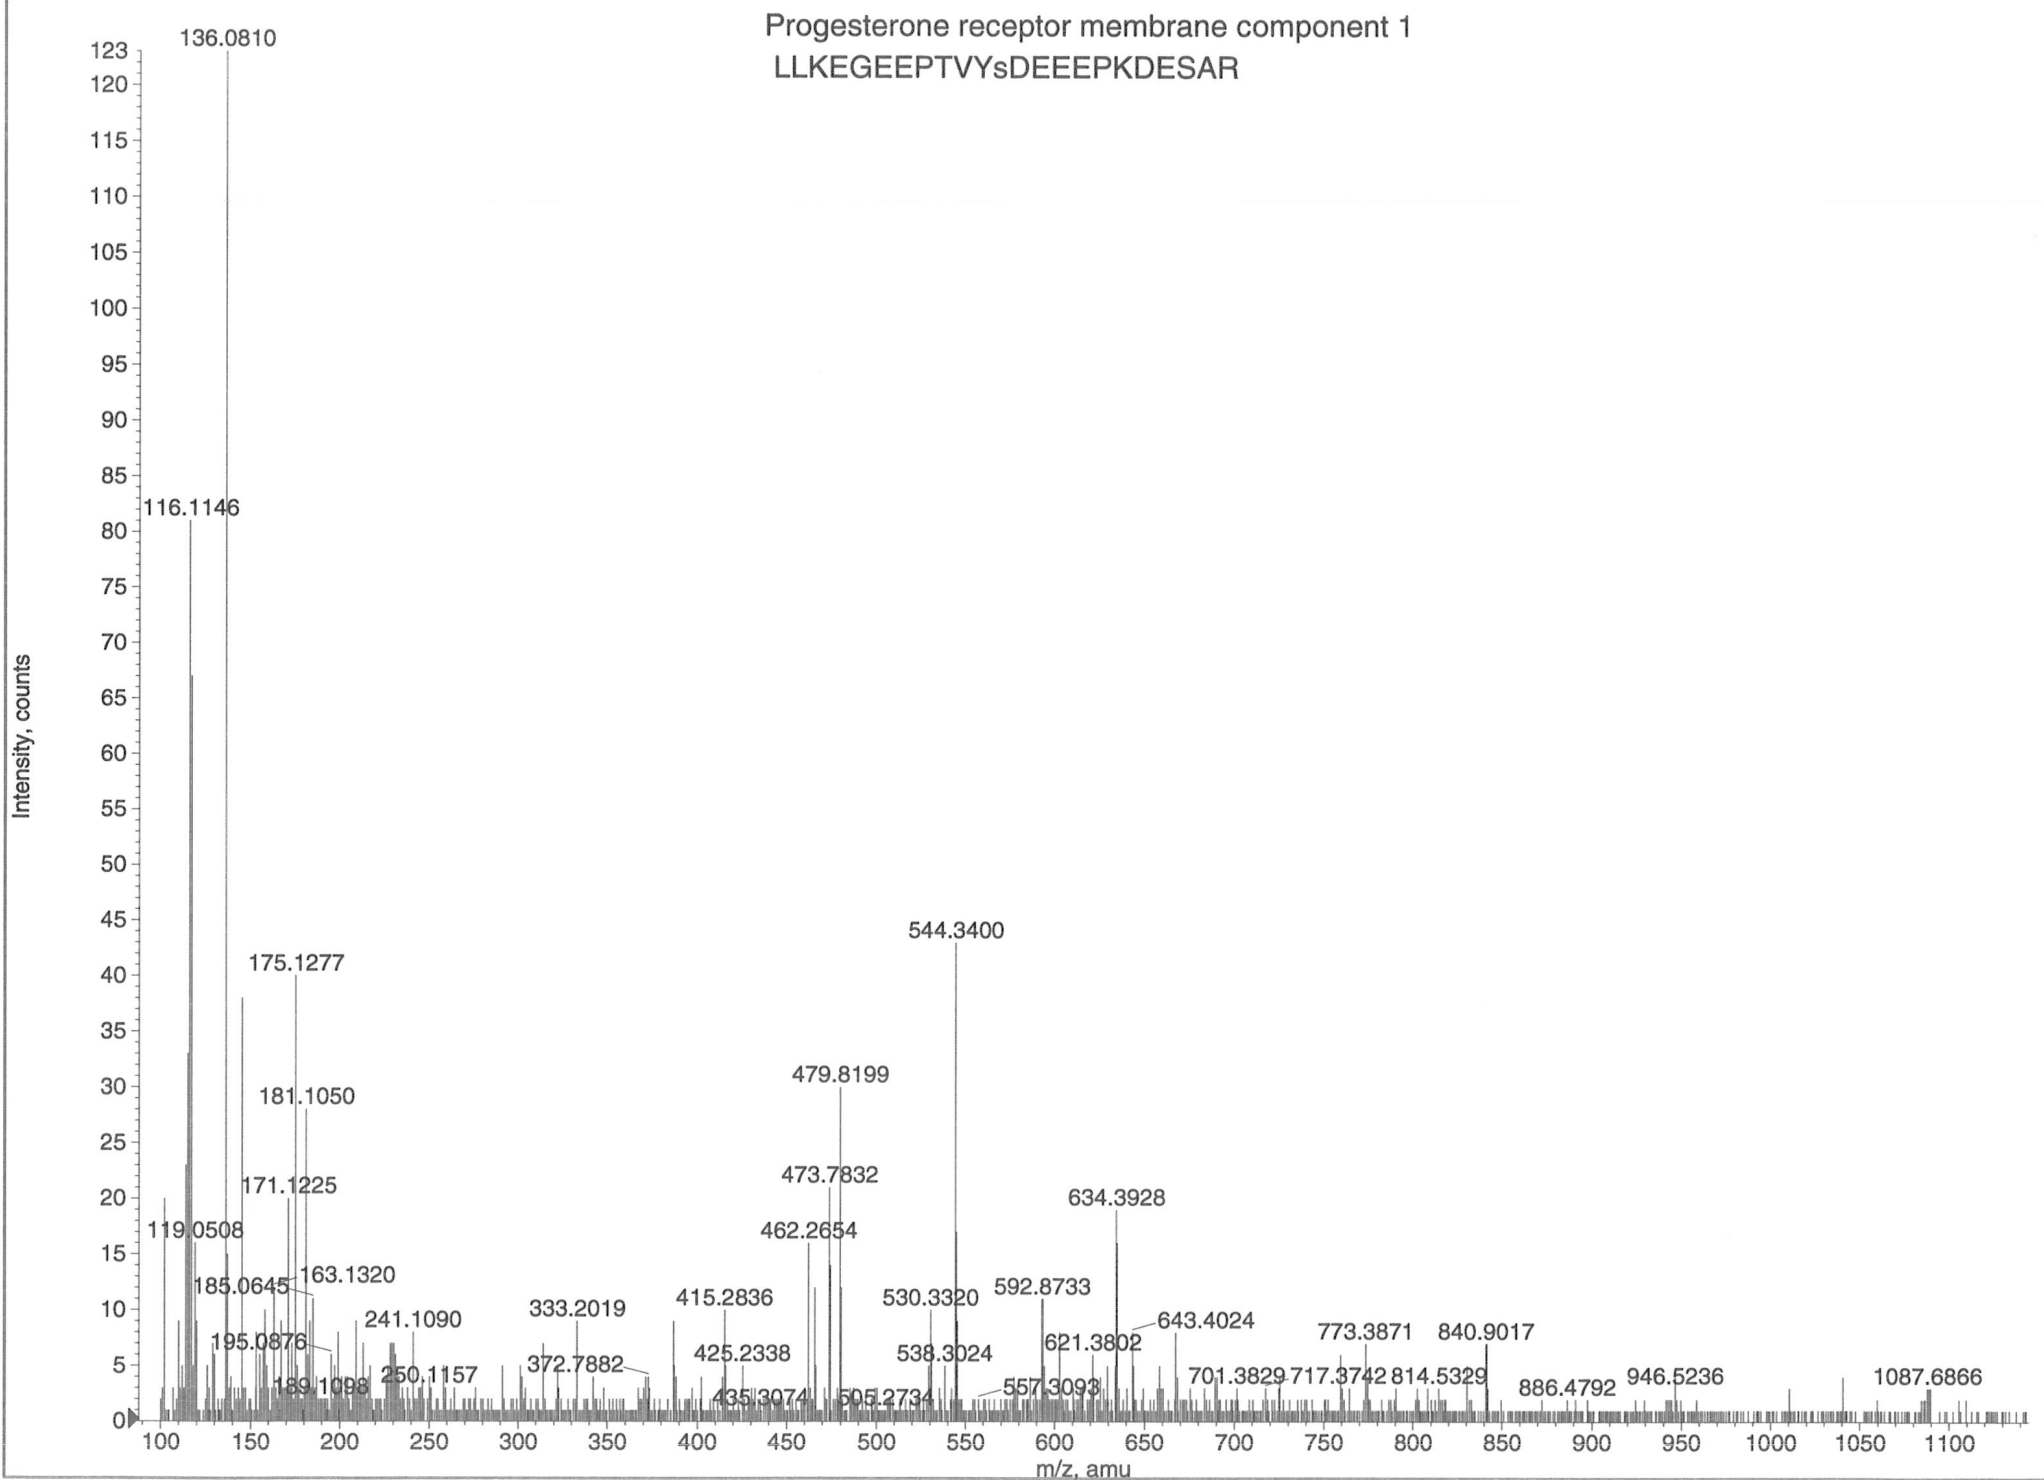

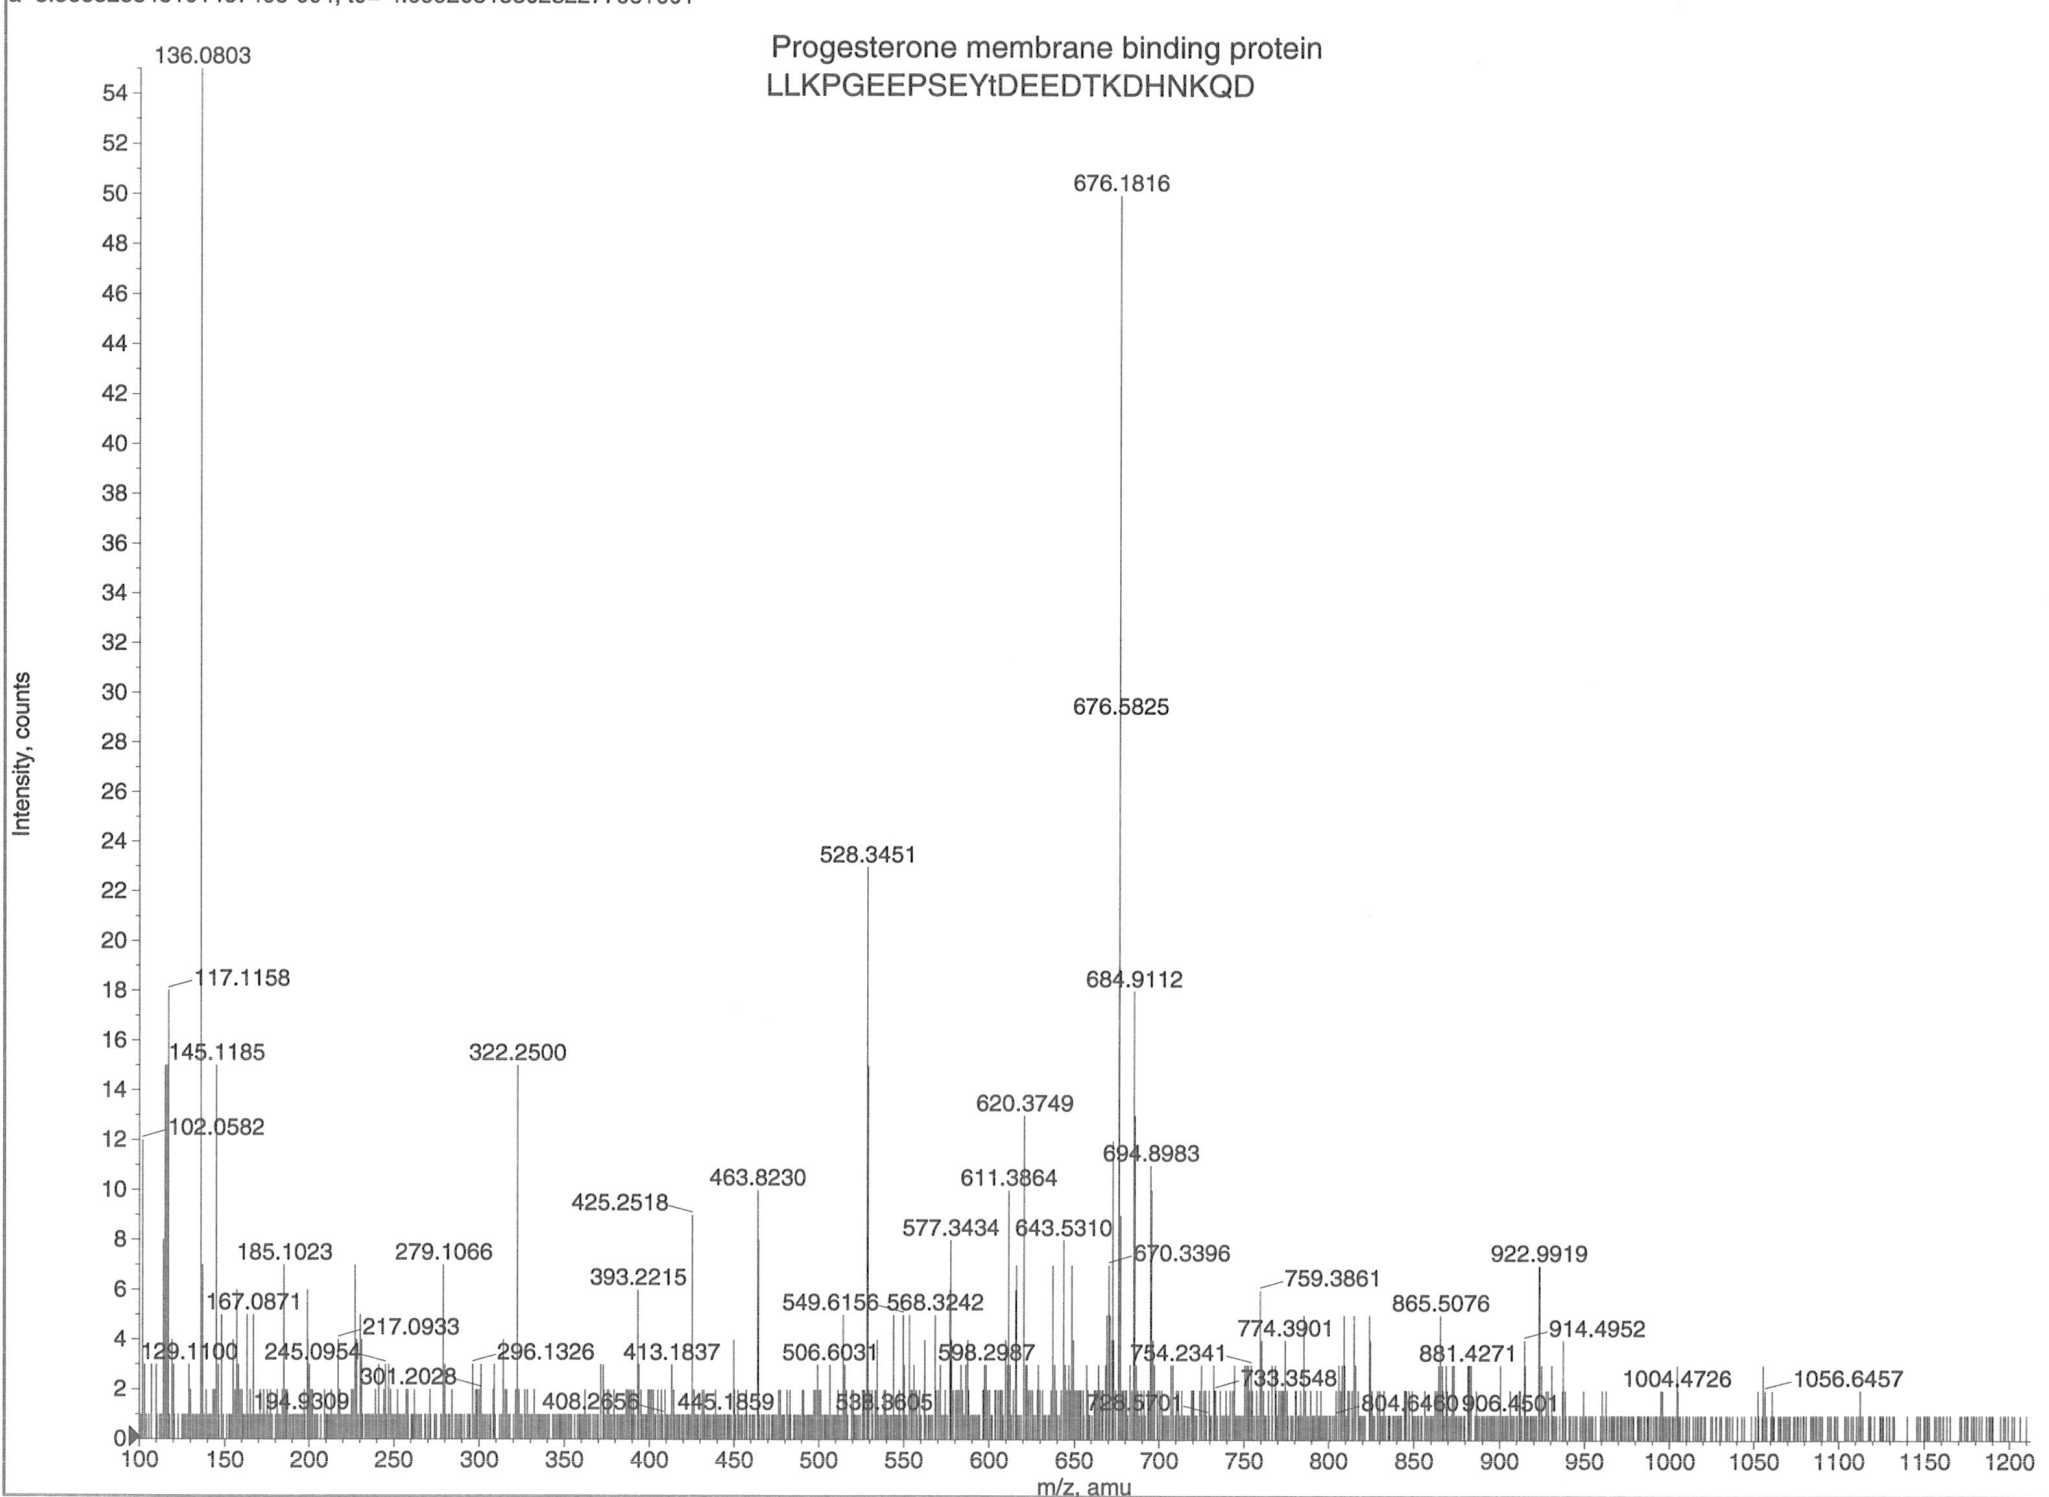

Pre-mRNA processing factor 31 homolog  
SSGTAsSVAfPLQGLEIVNPQAAEK

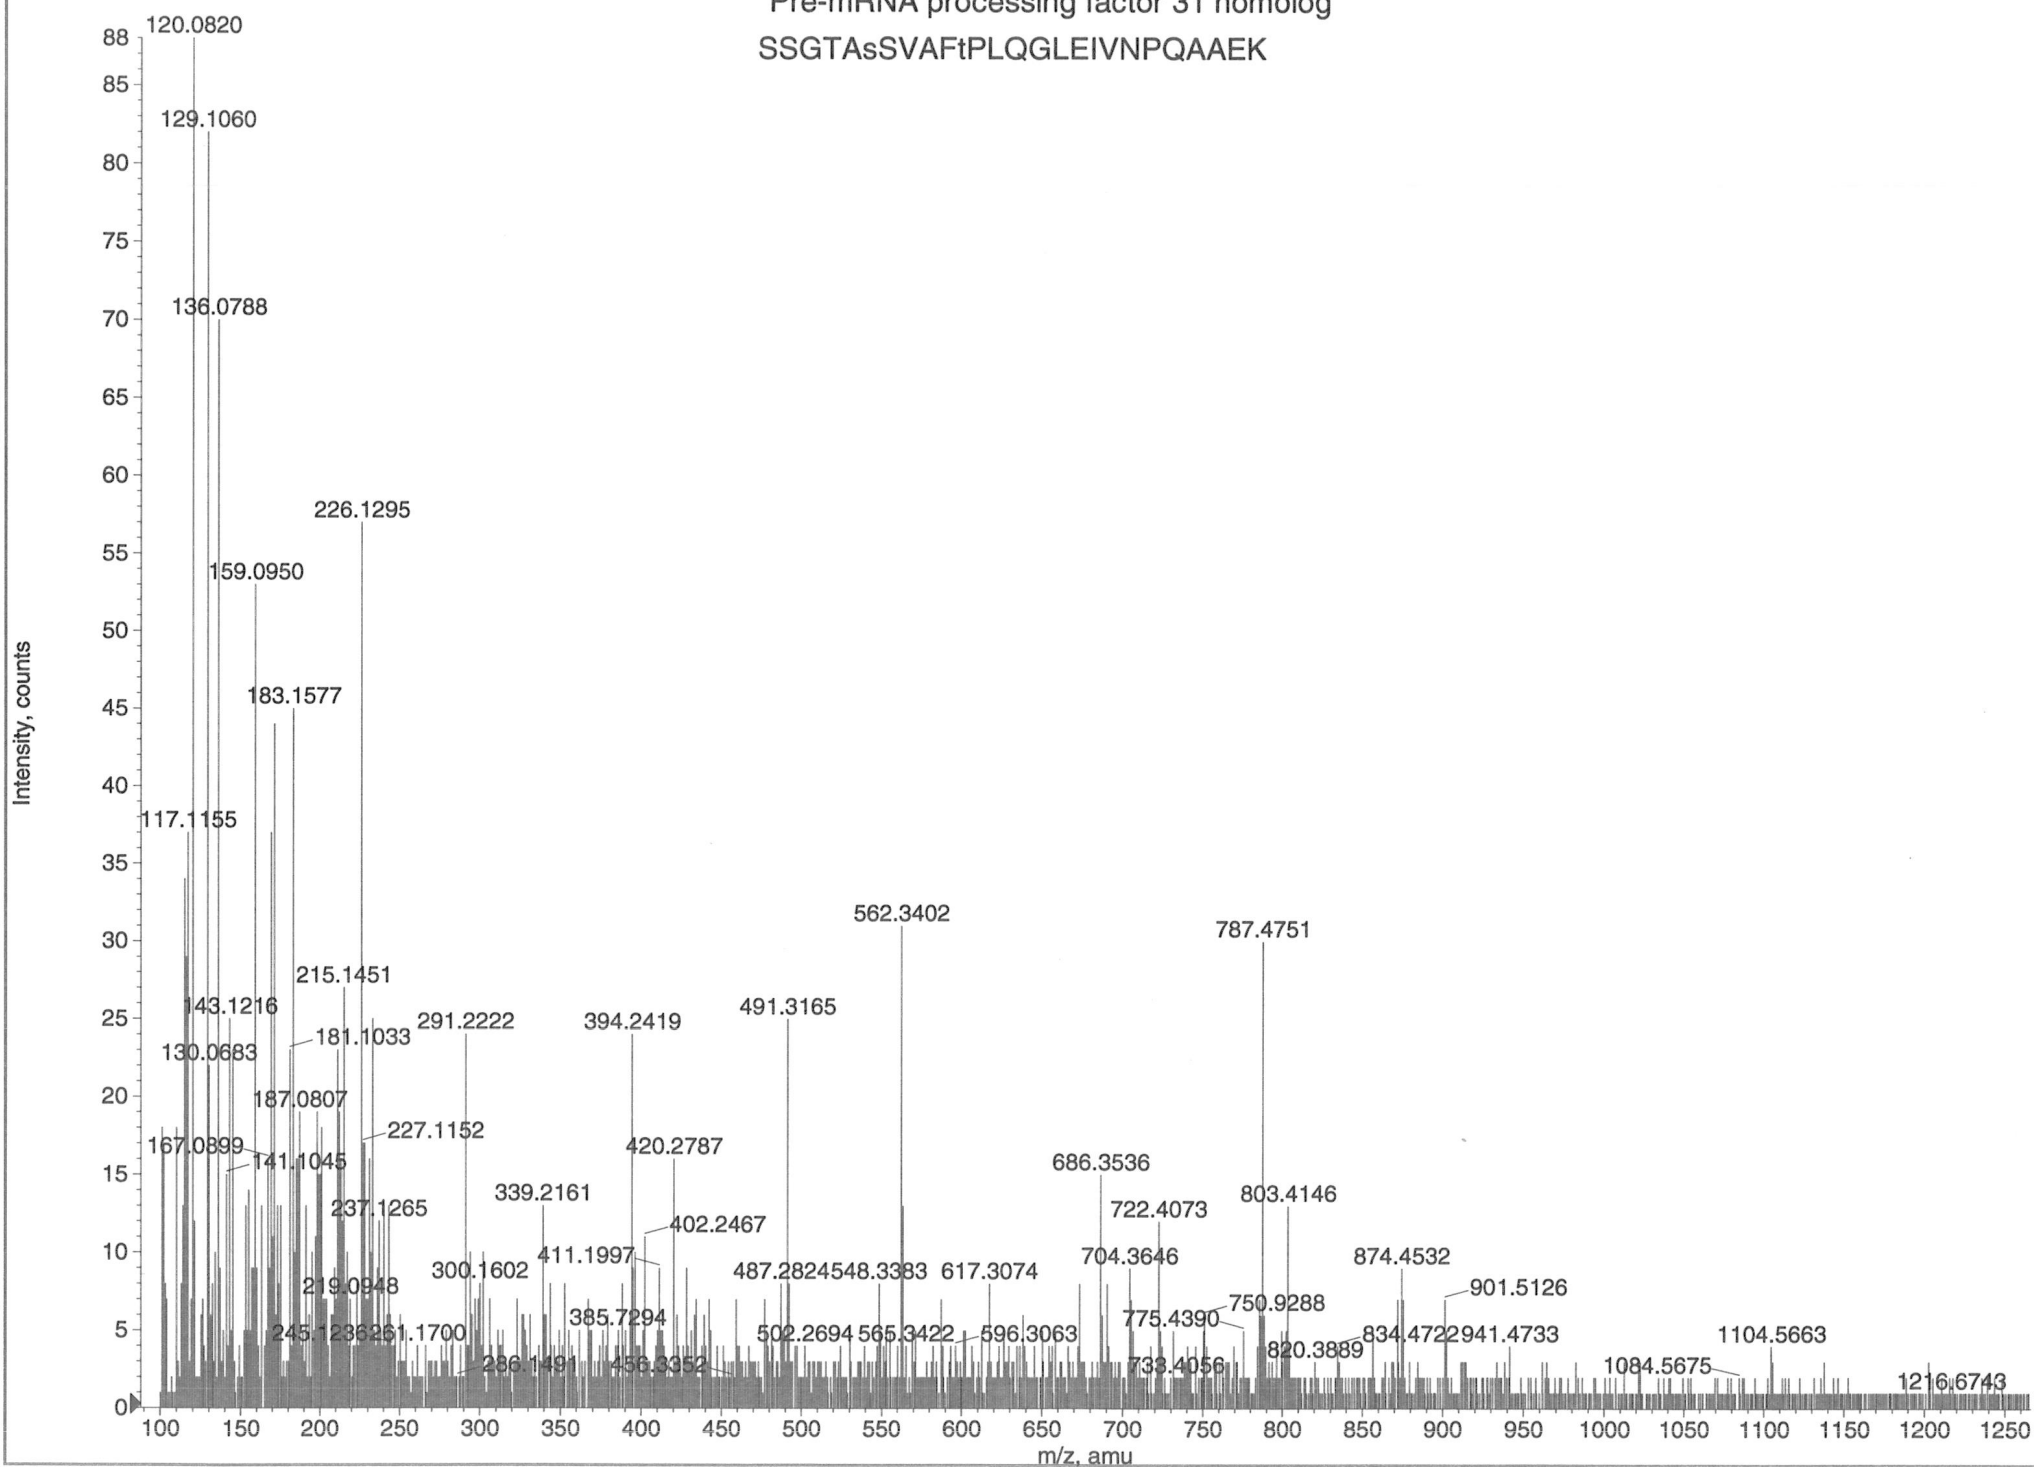

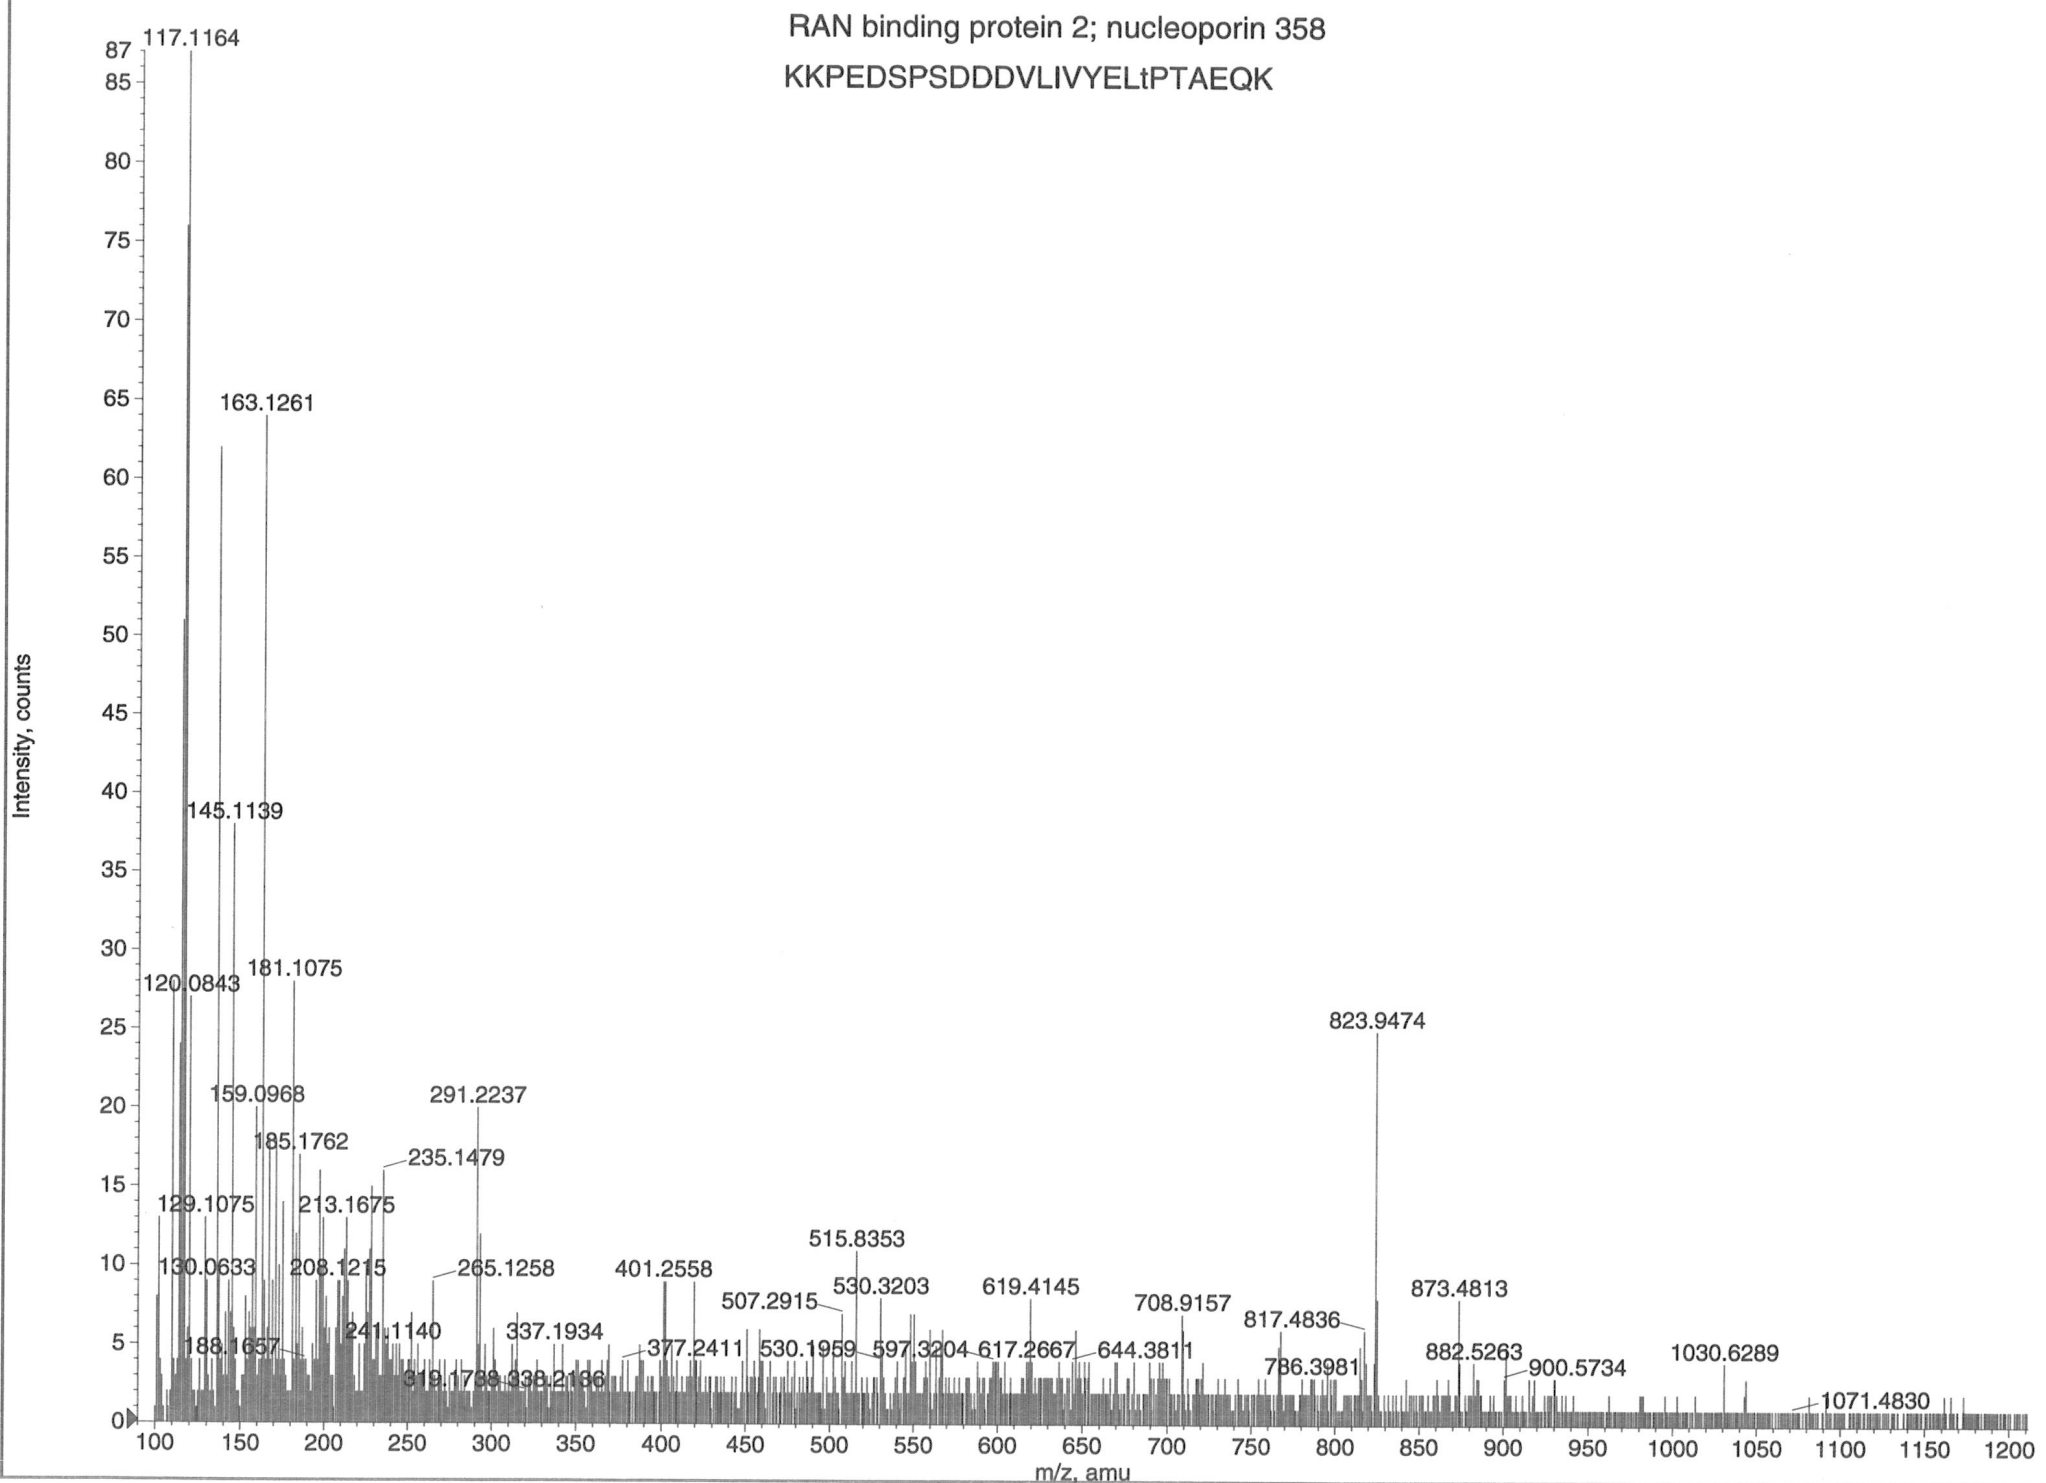

Retinoblastoma 1  
DREGPTDHLESACPLNLPLQNNHTAADMYLsPV

Intensity, counts

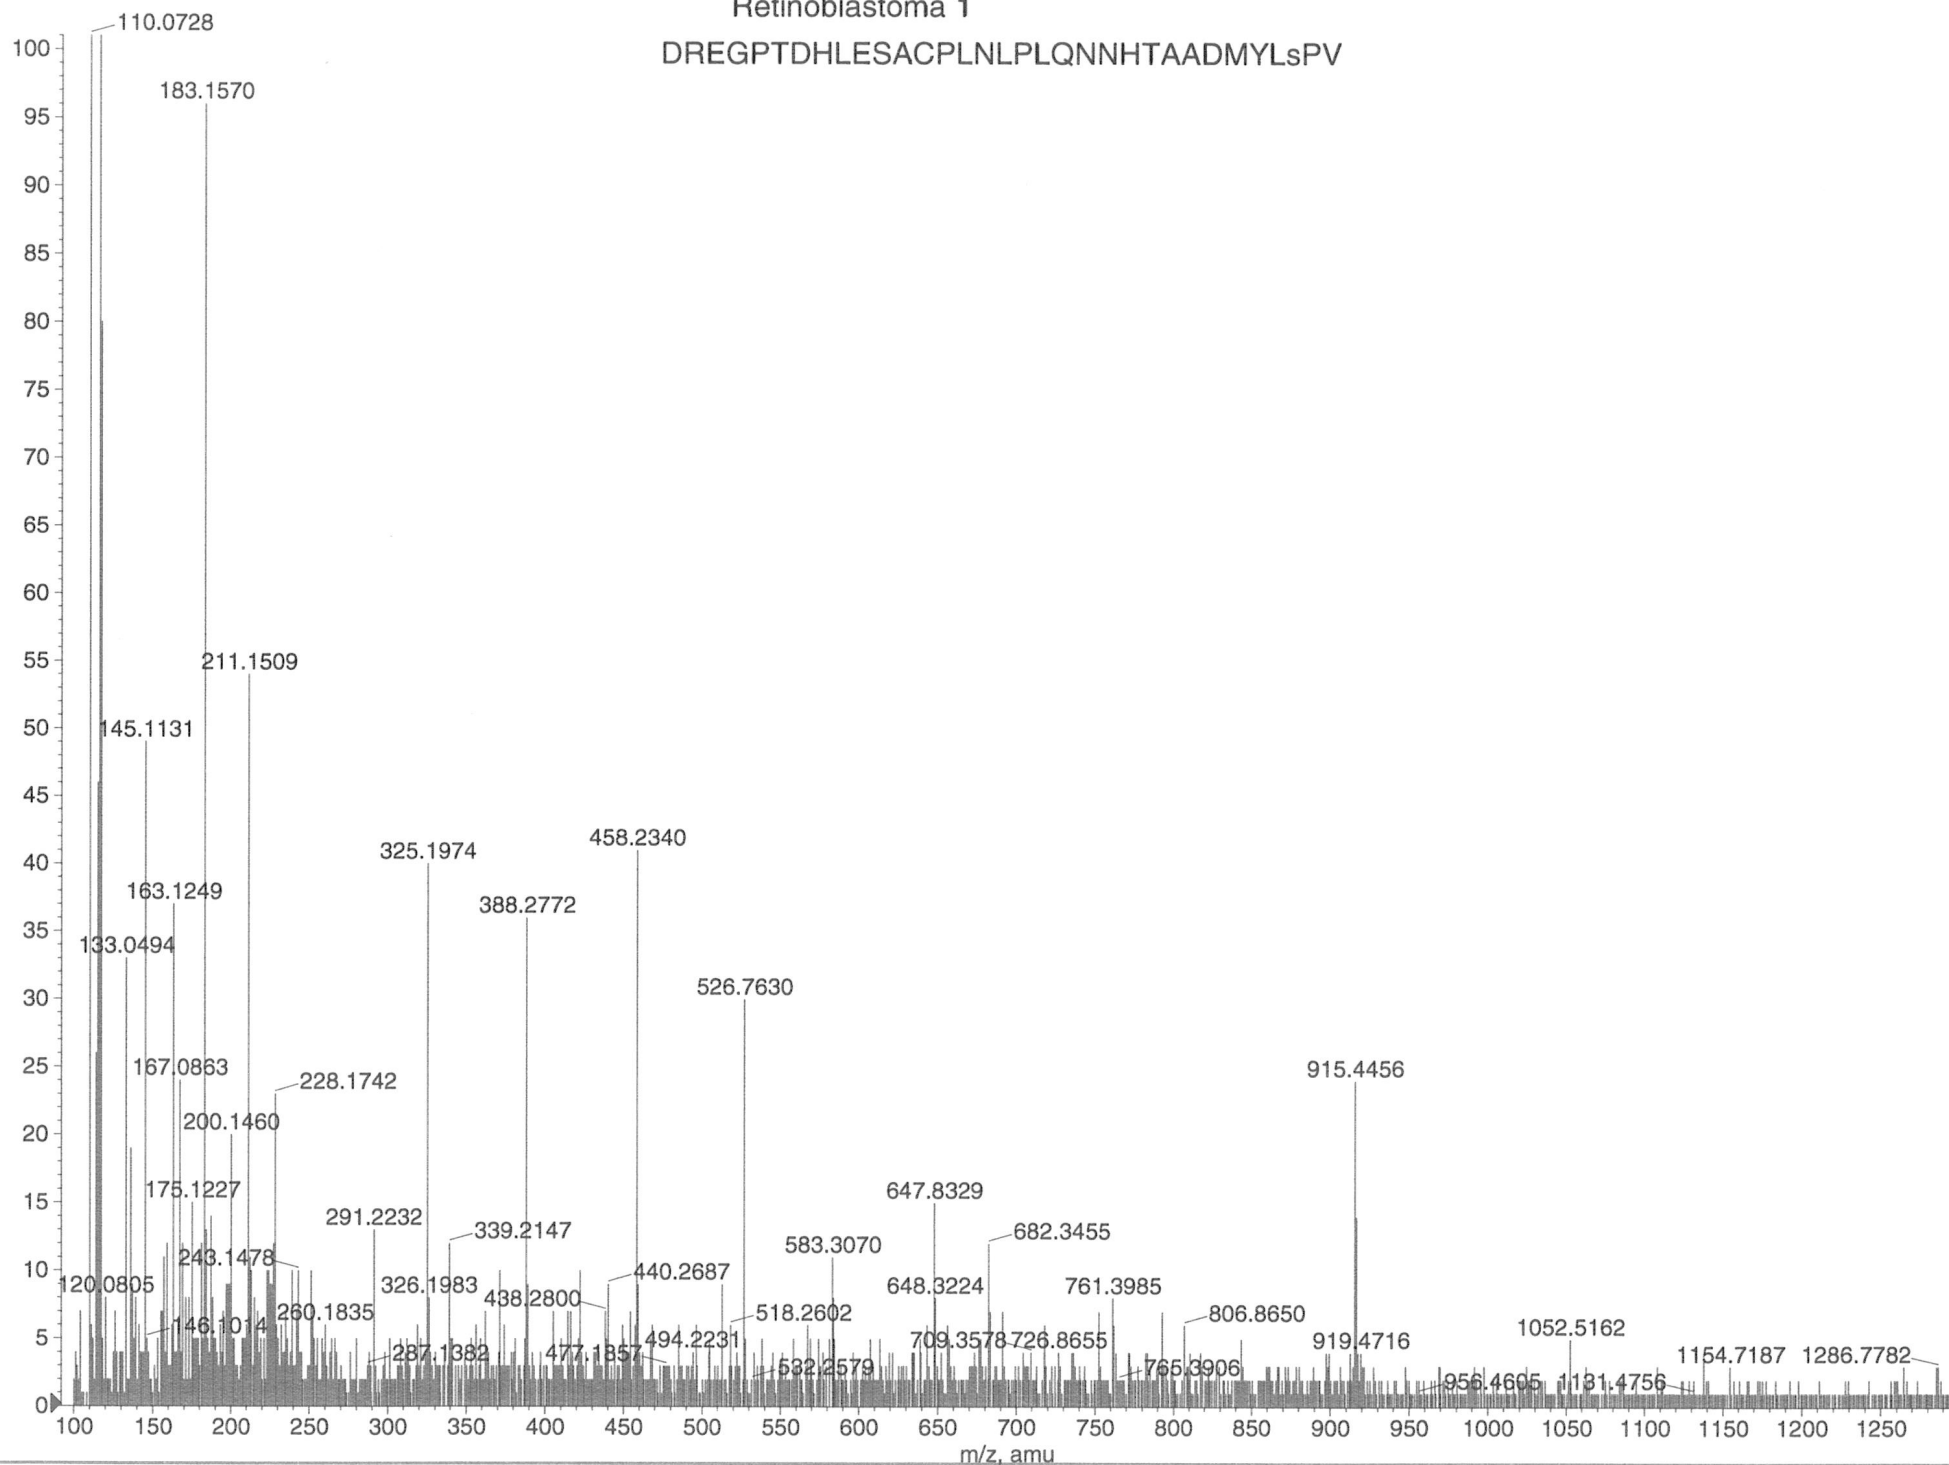

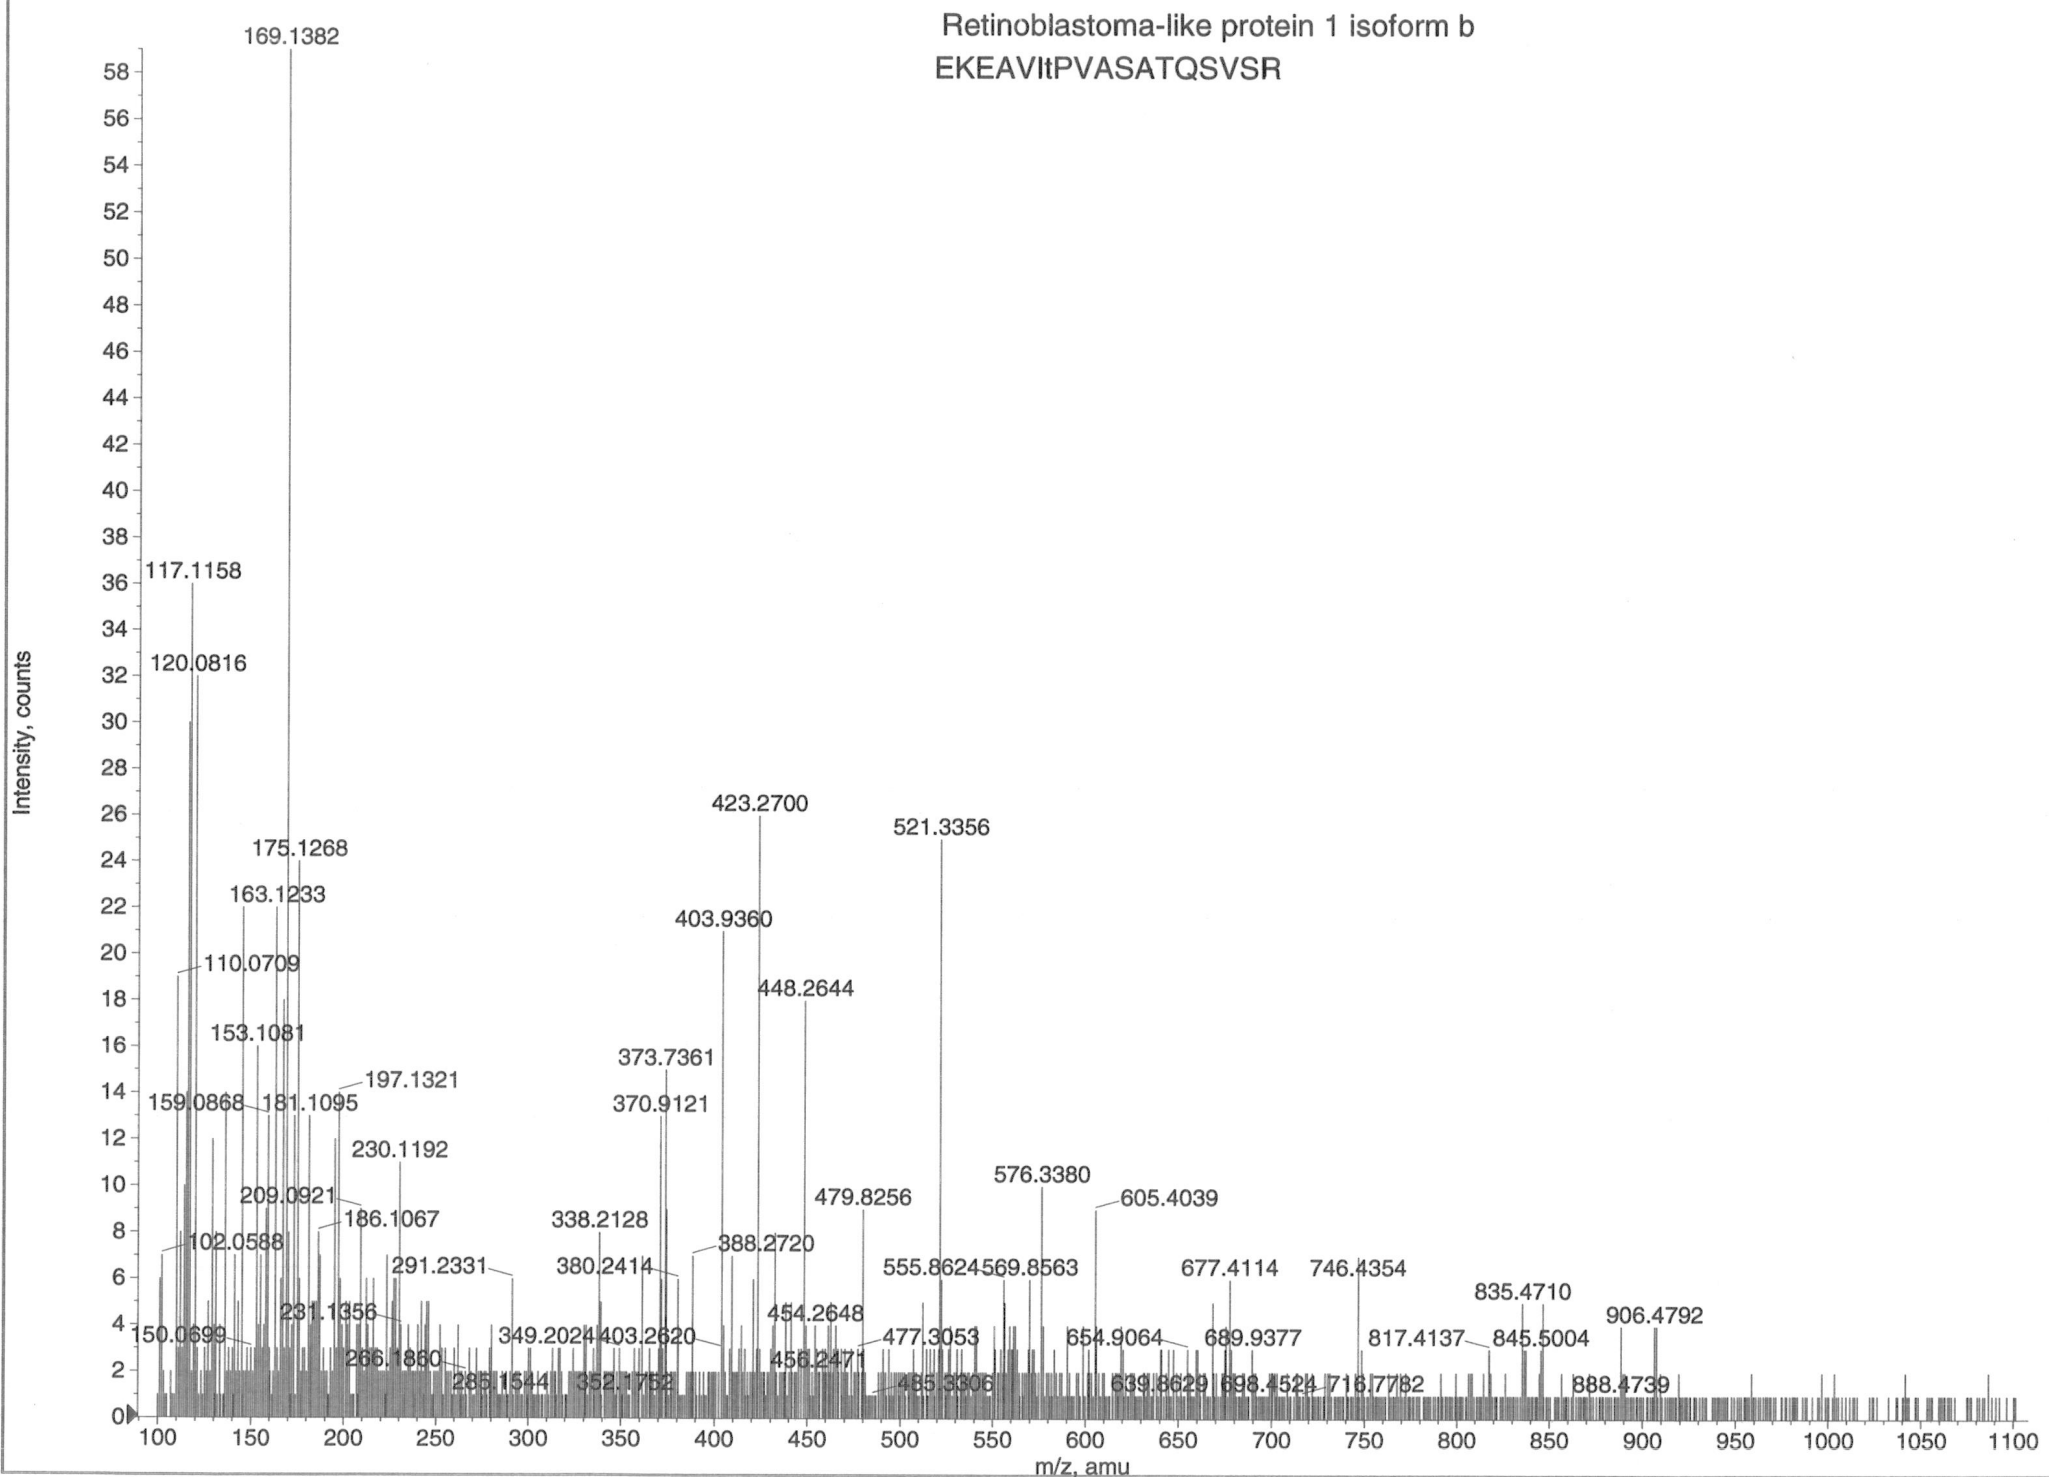

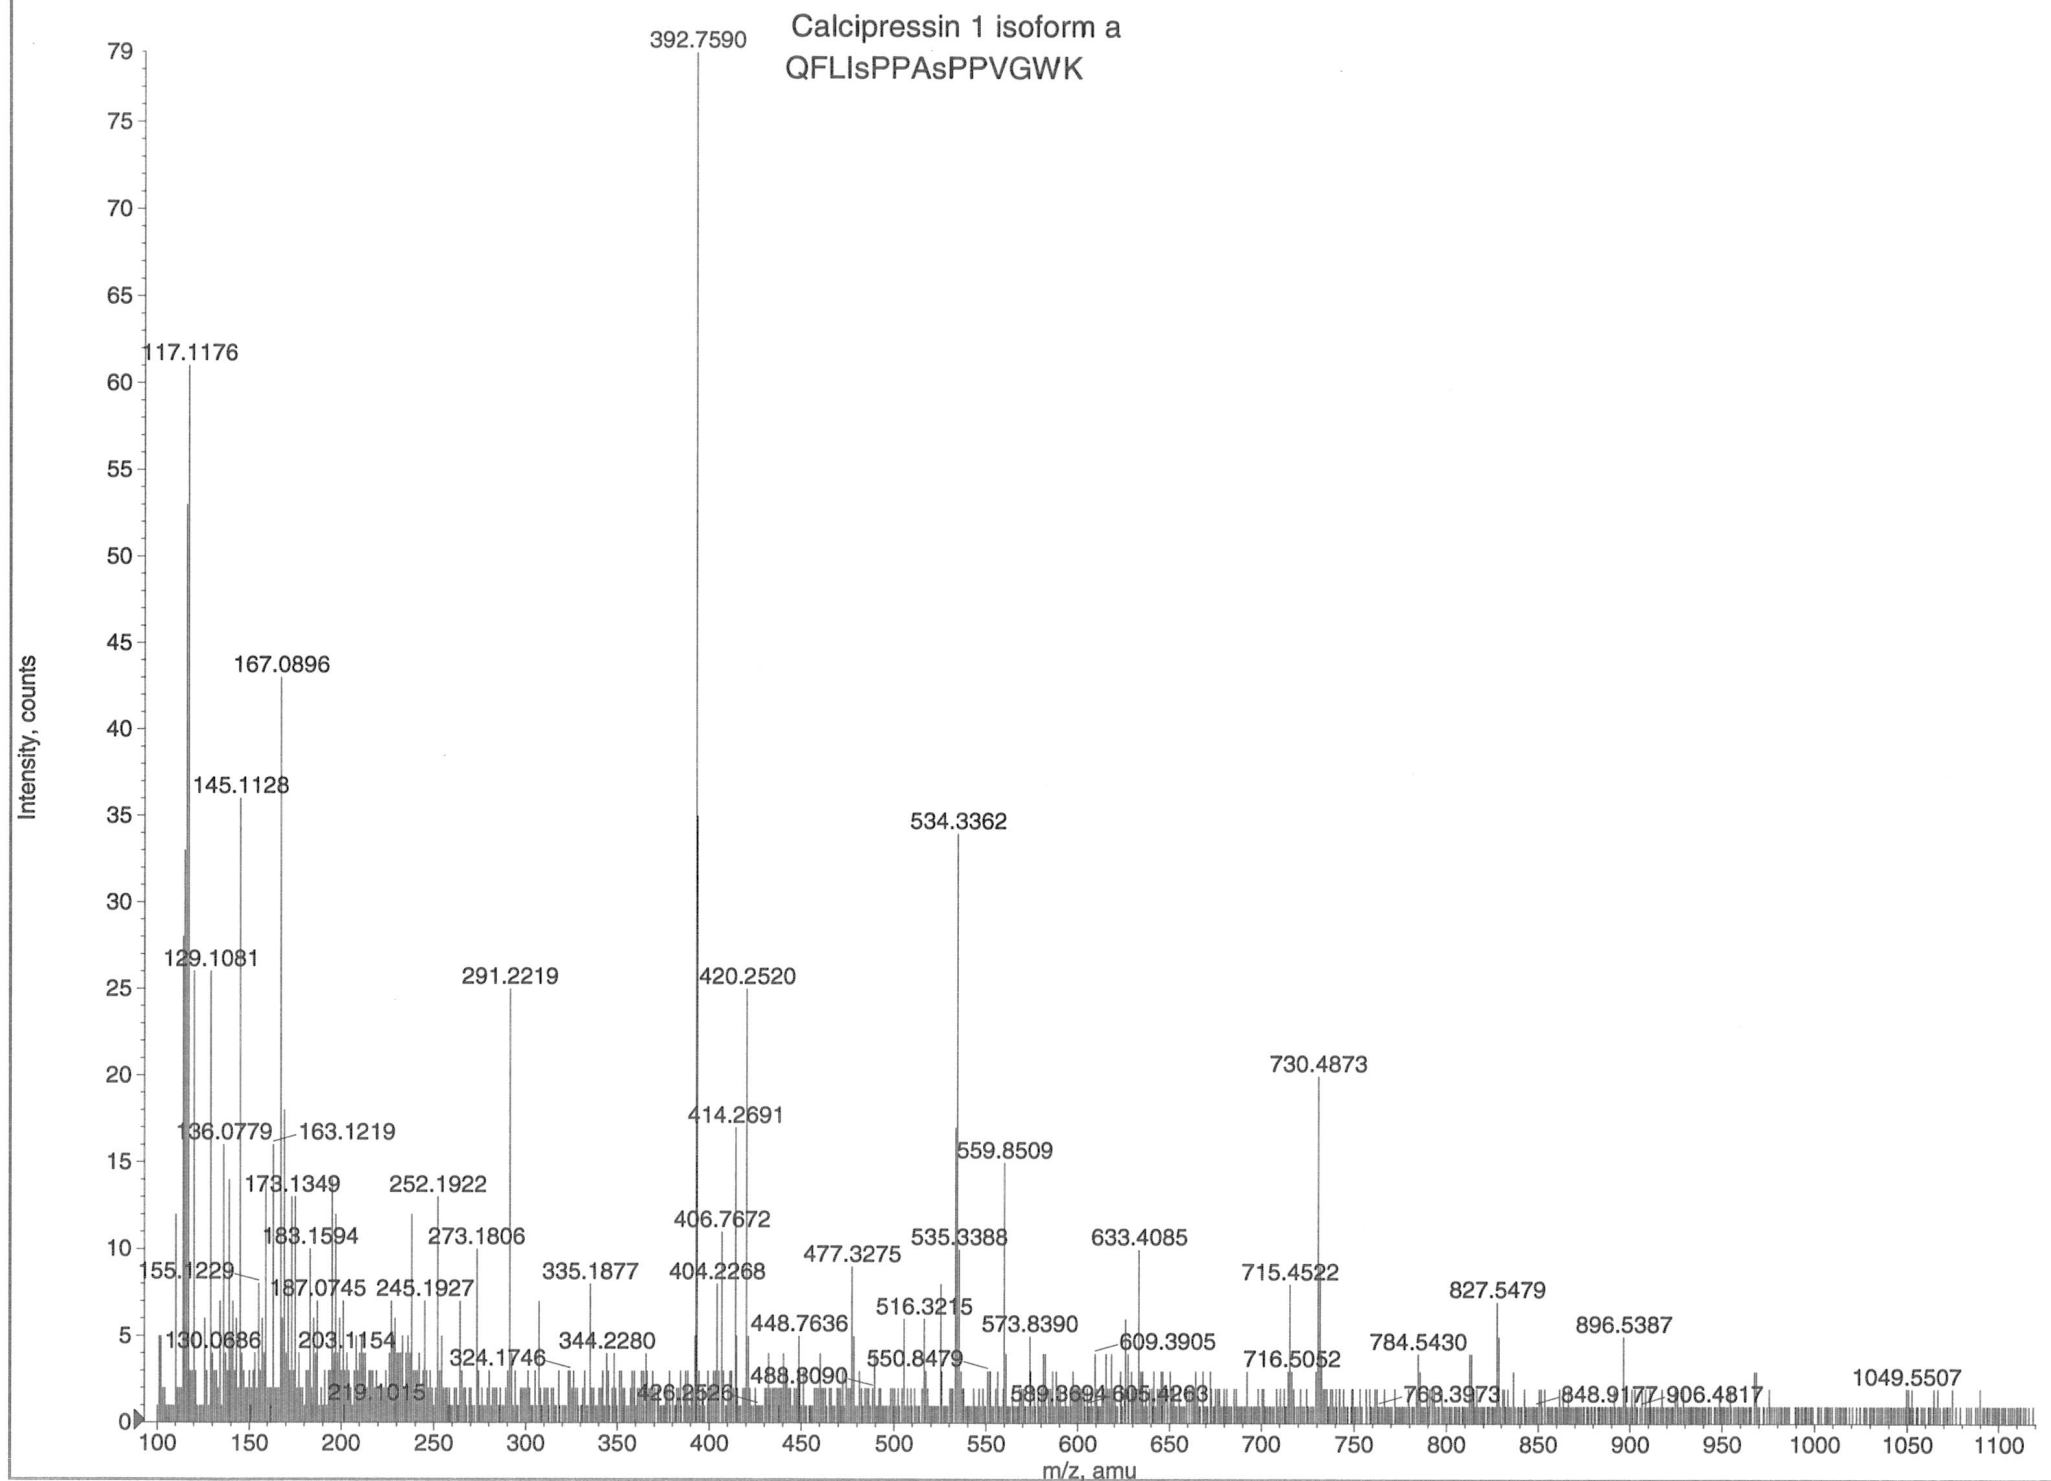



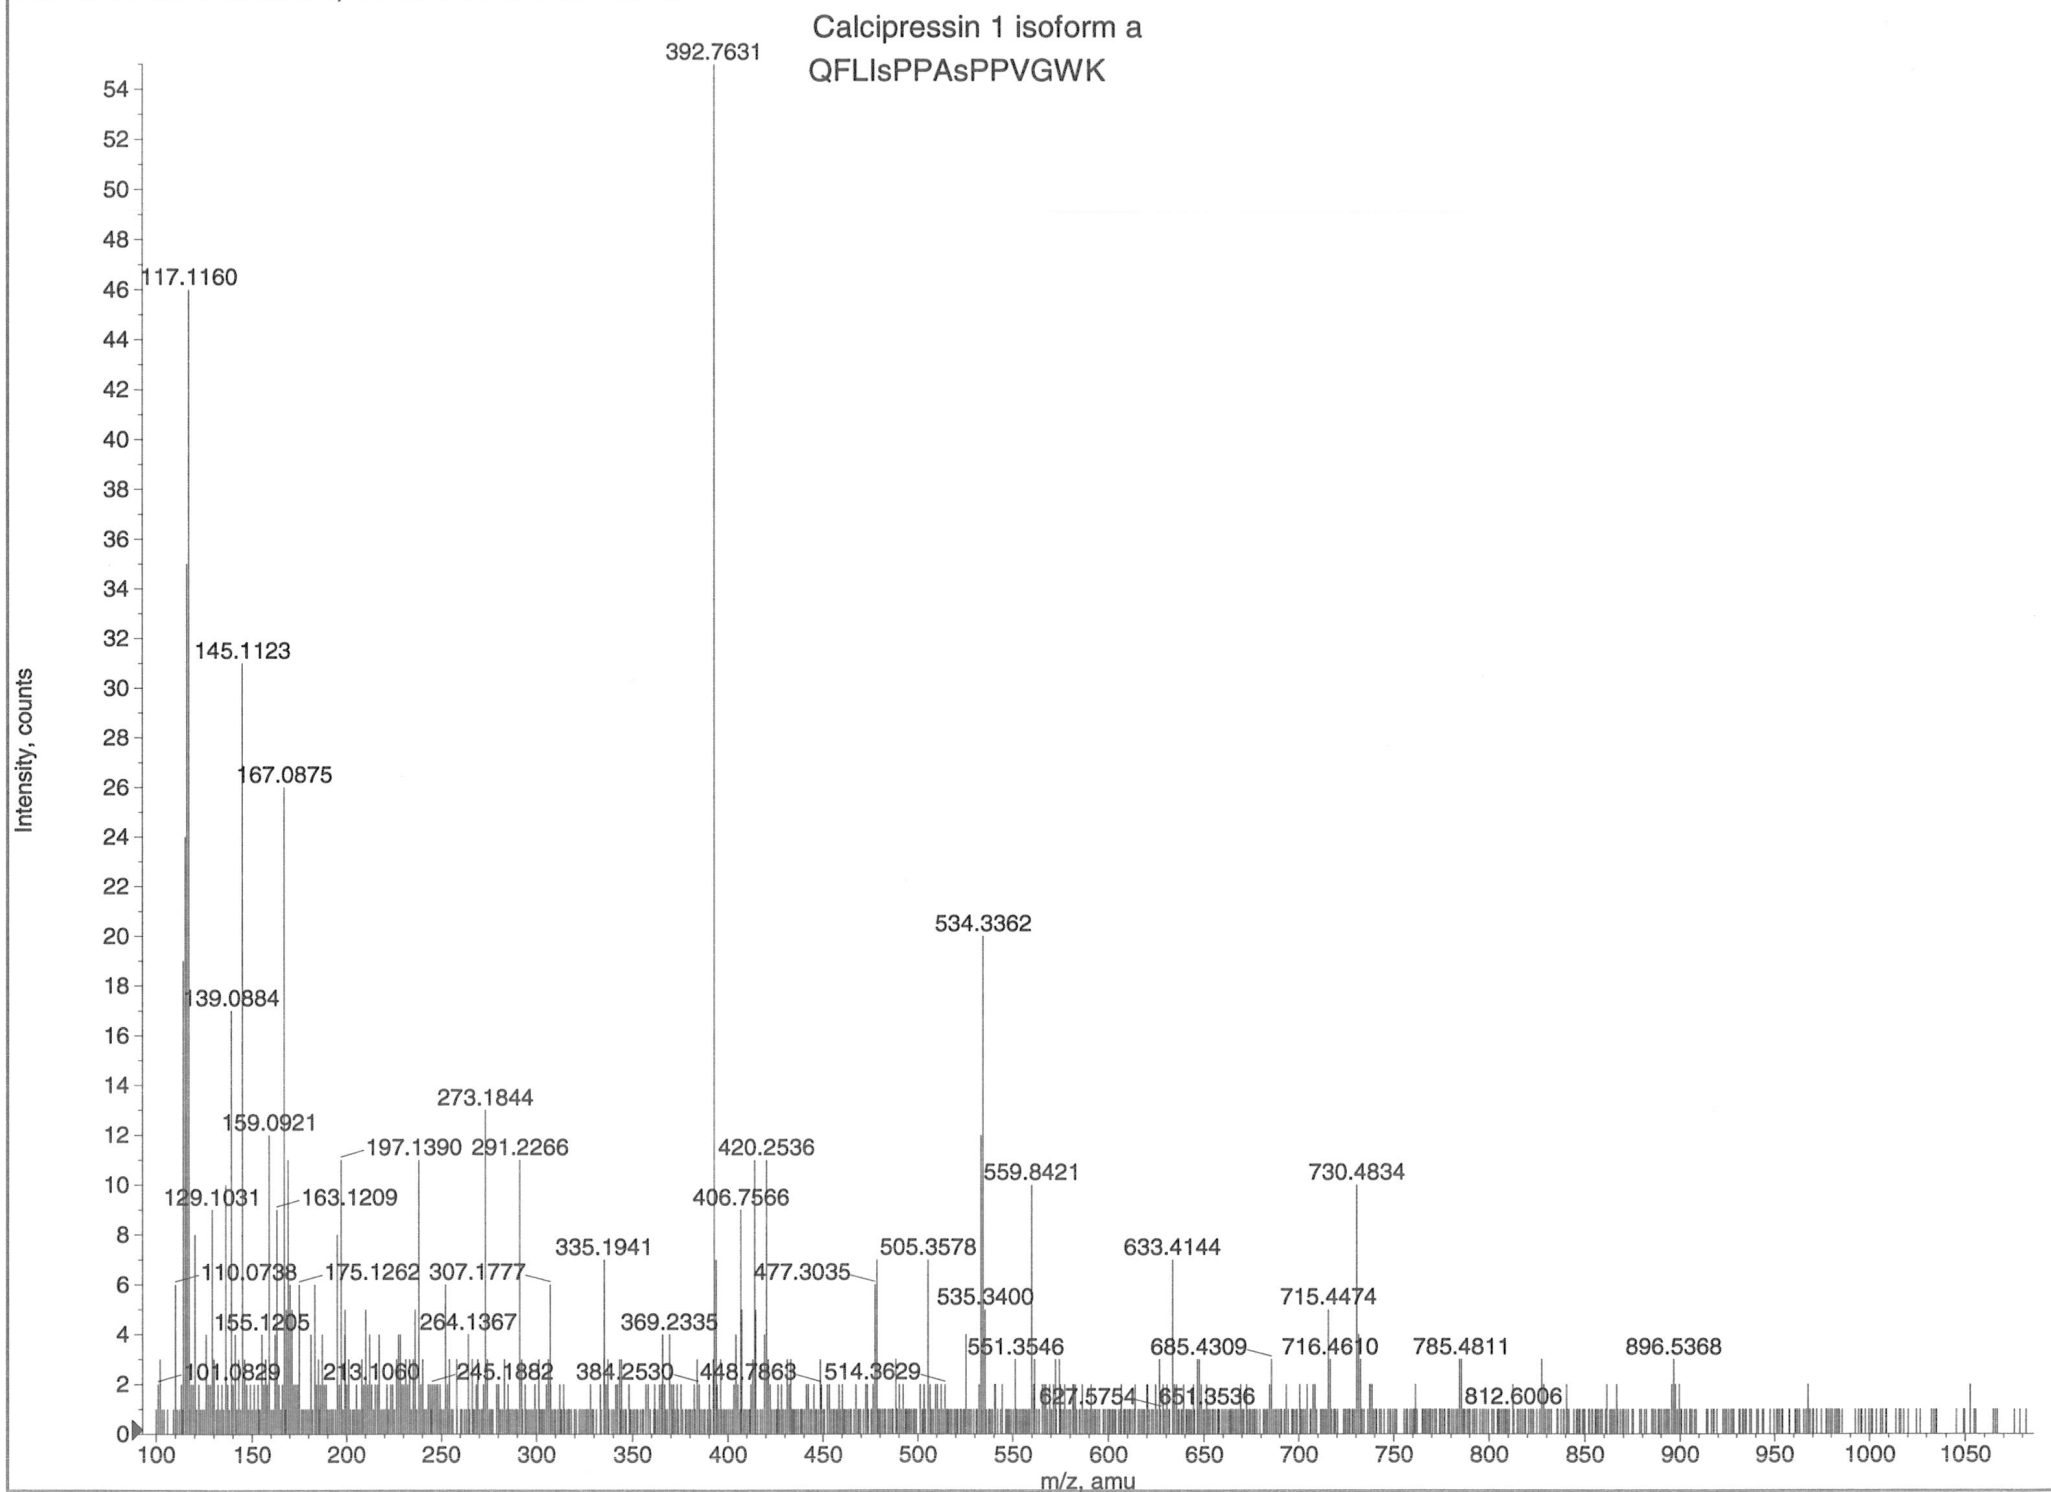

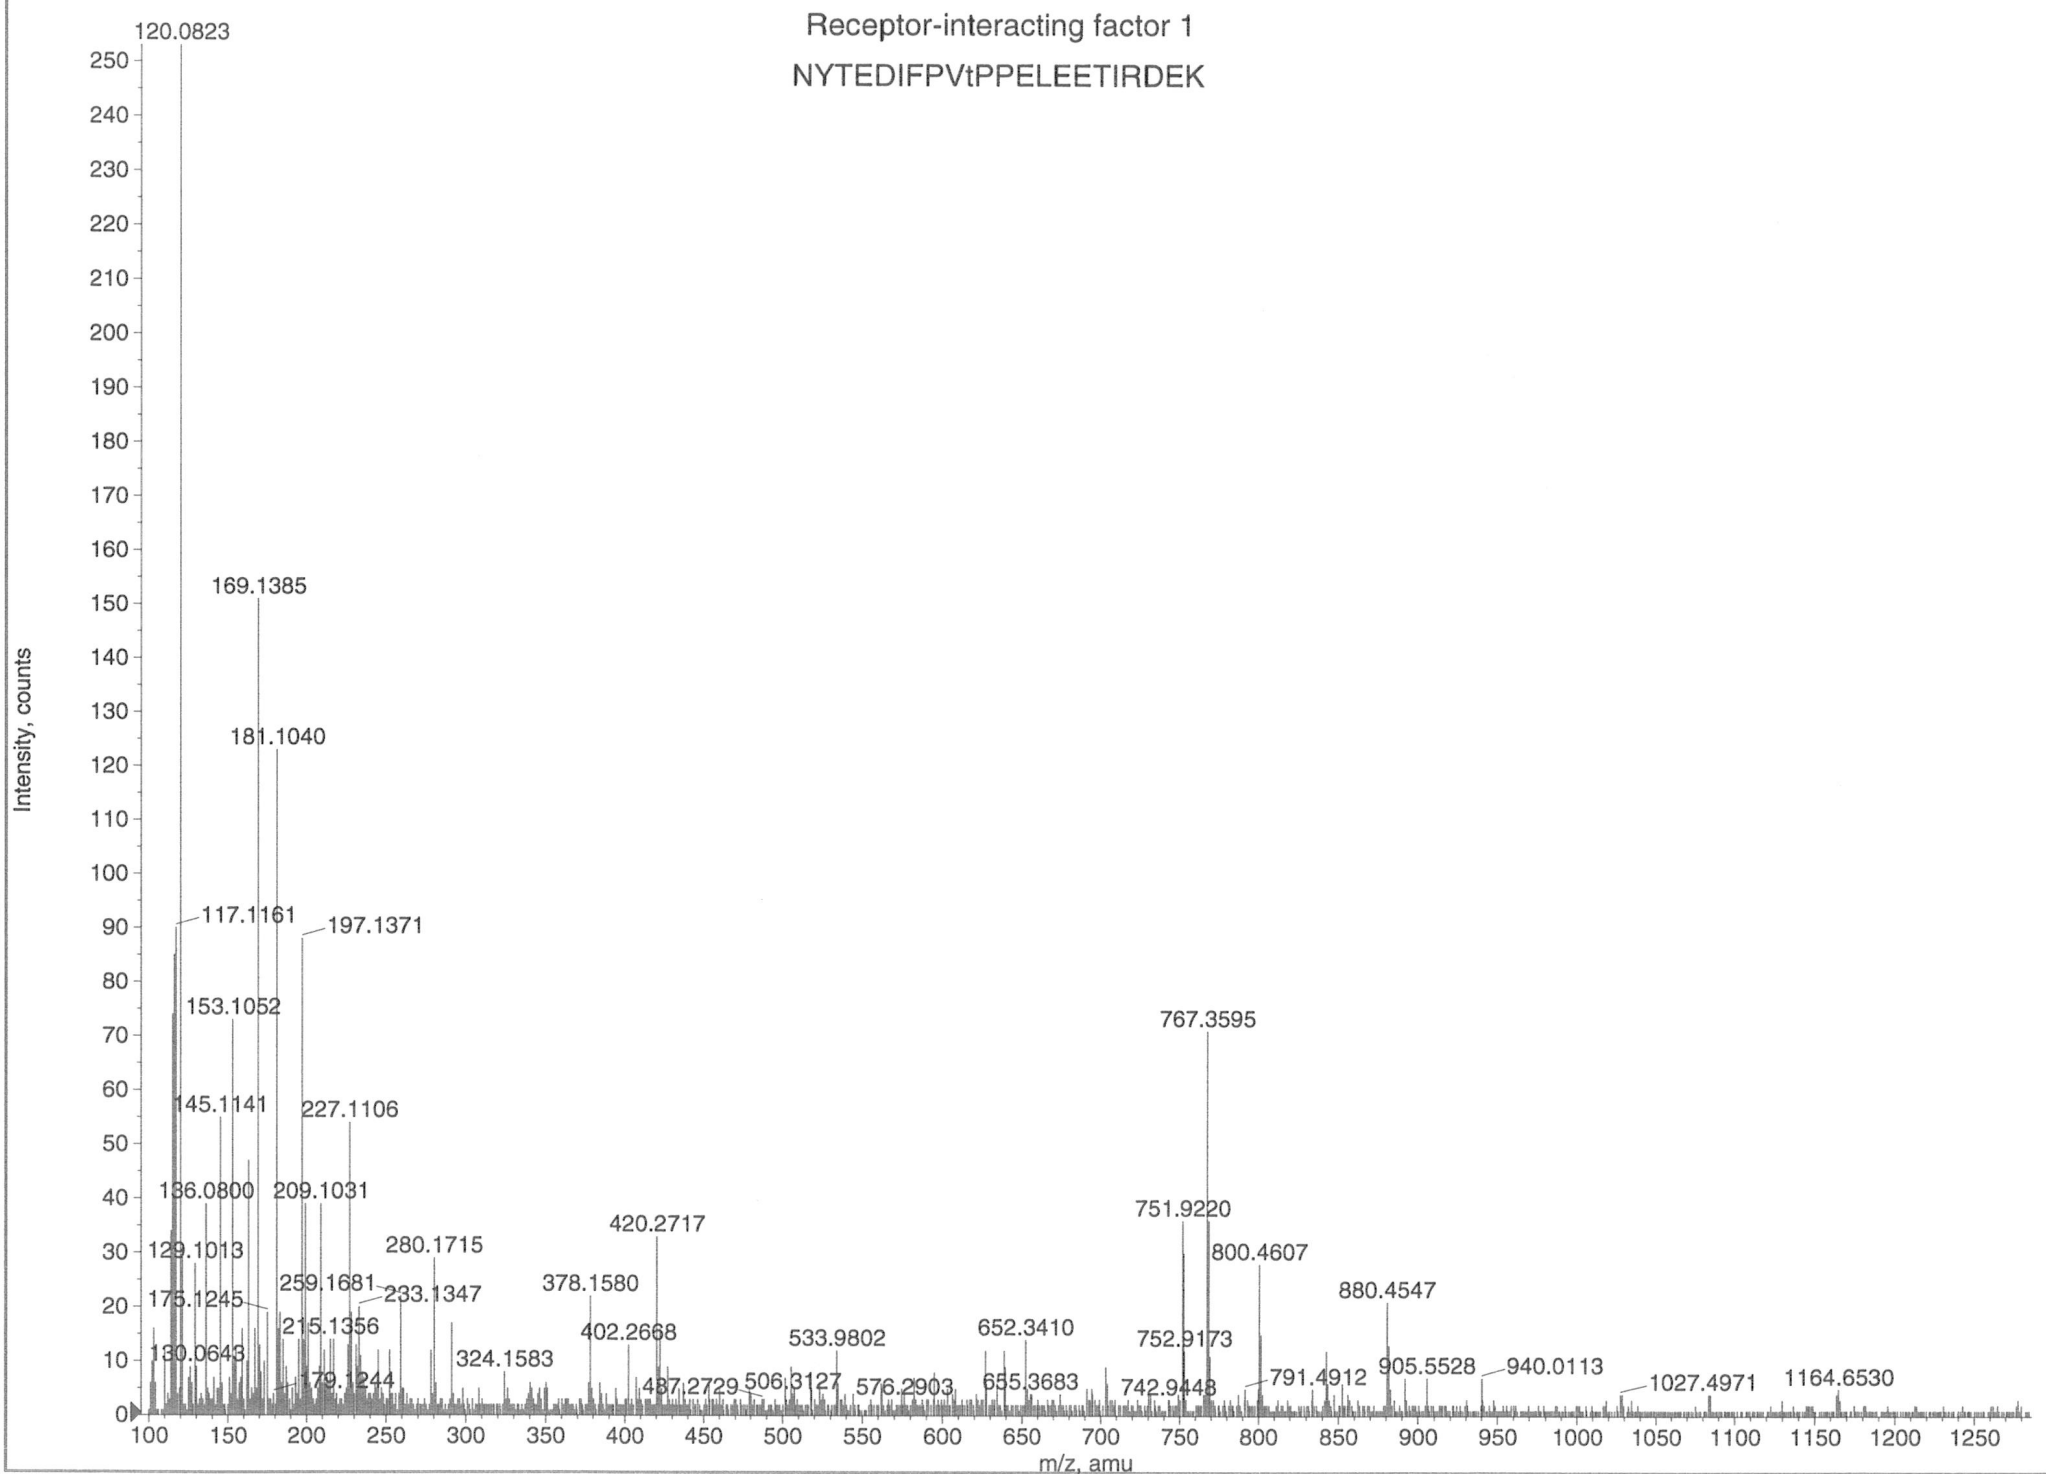

Receptor-interacting factor 1  
NYTEDIFPVtPPELEETIRDEK

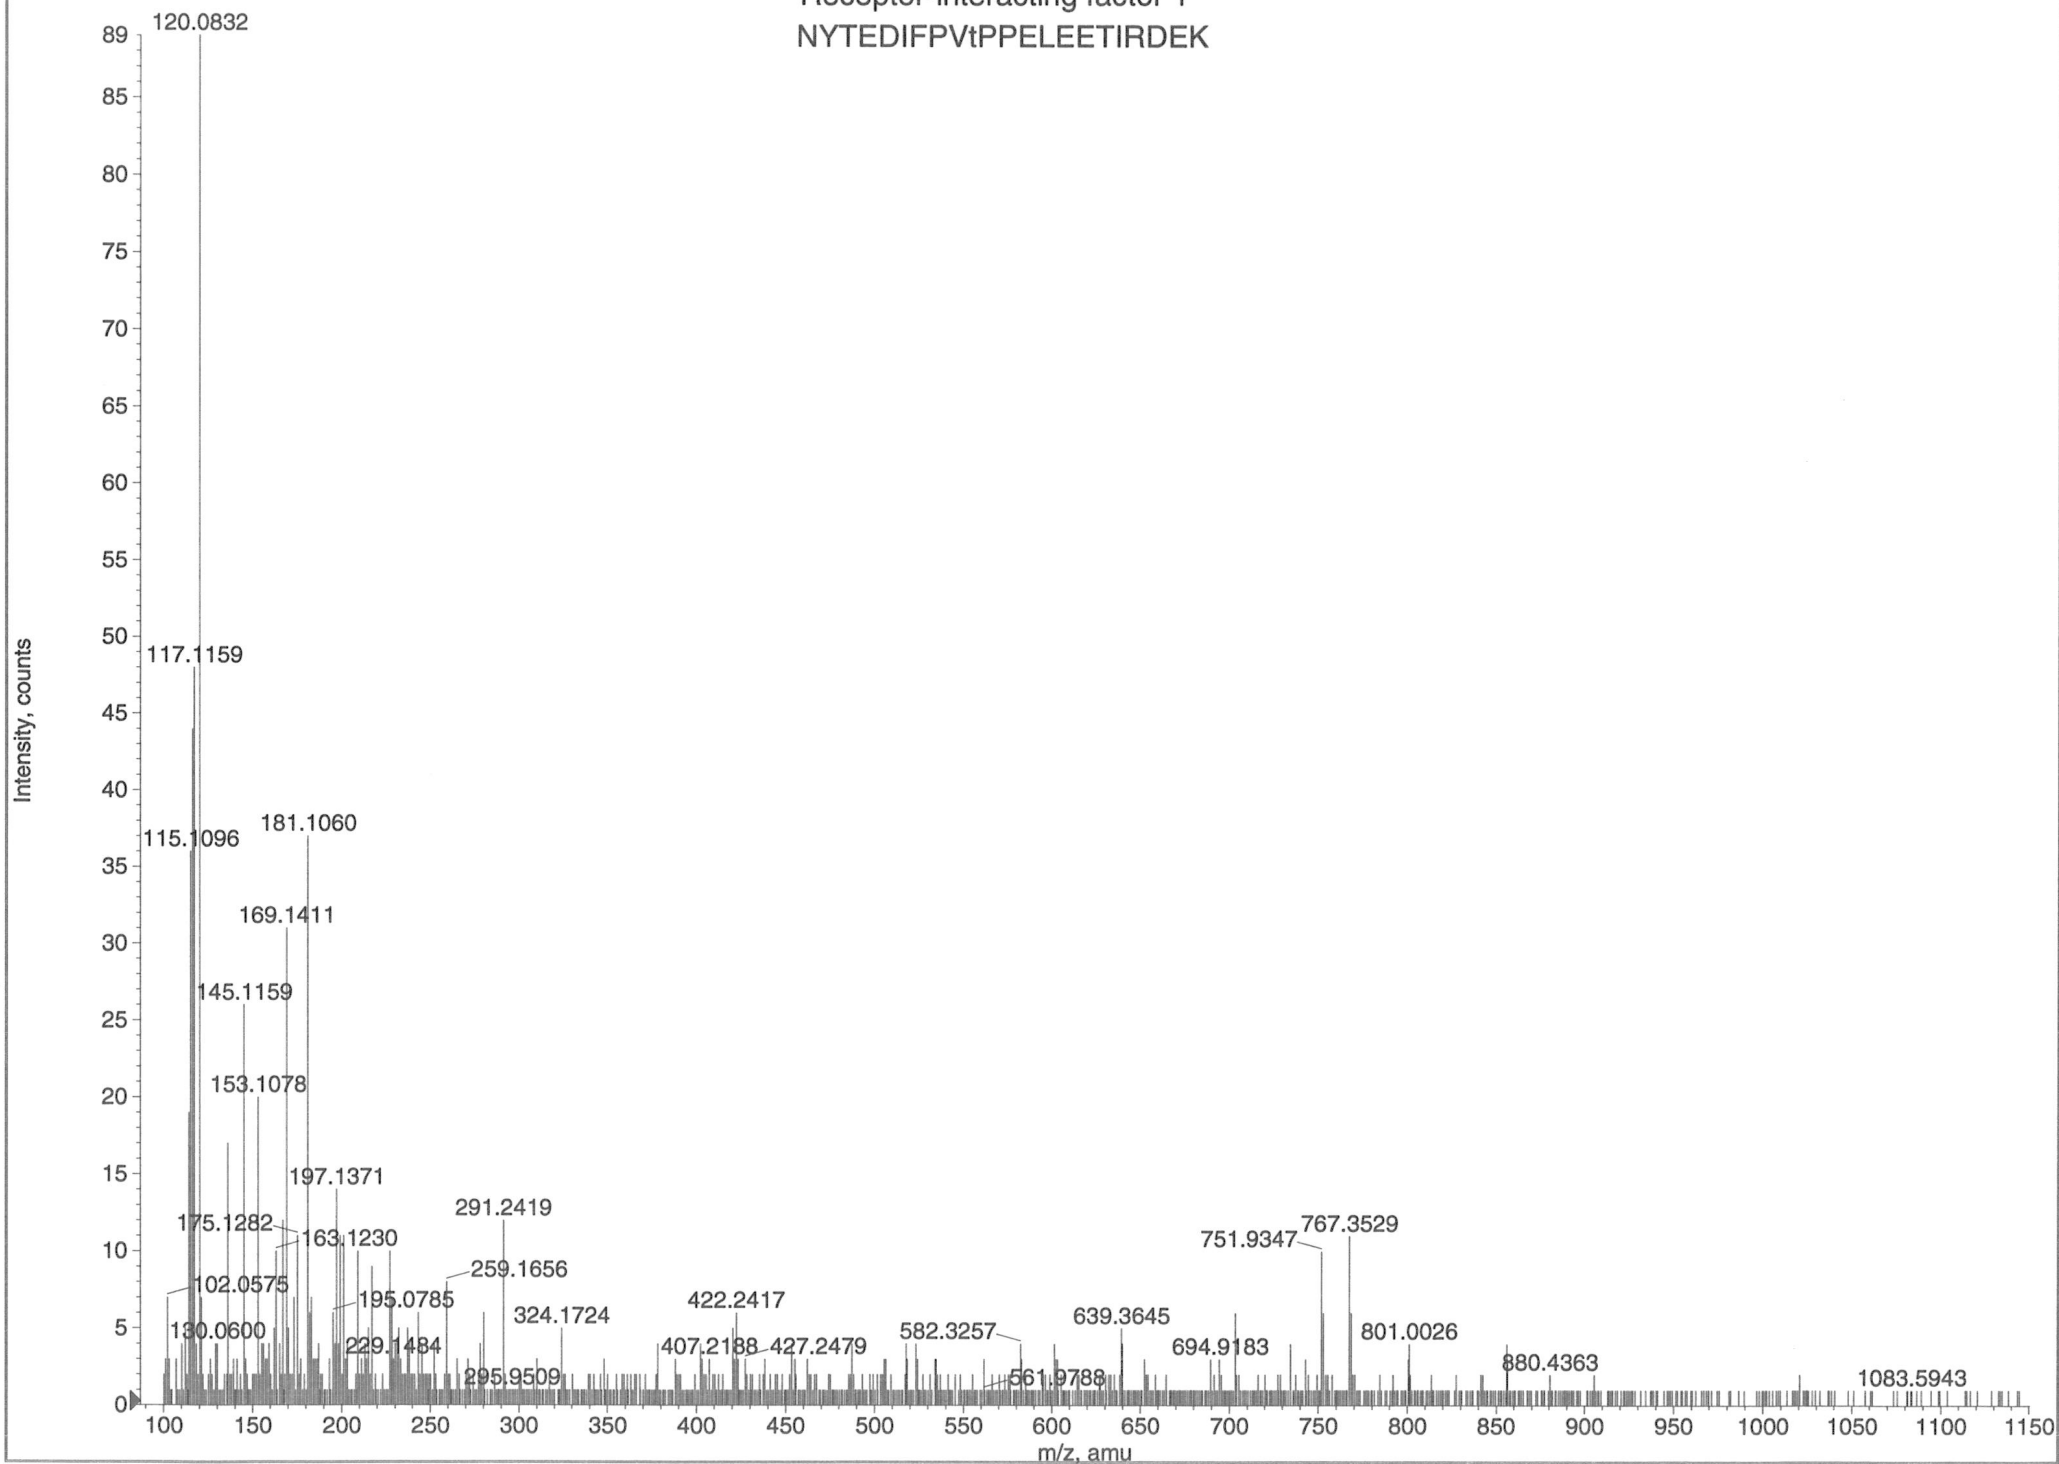

Ribonucleotide reductase M2 polypeptide  
VPLAPITDPQQLQLsPLK

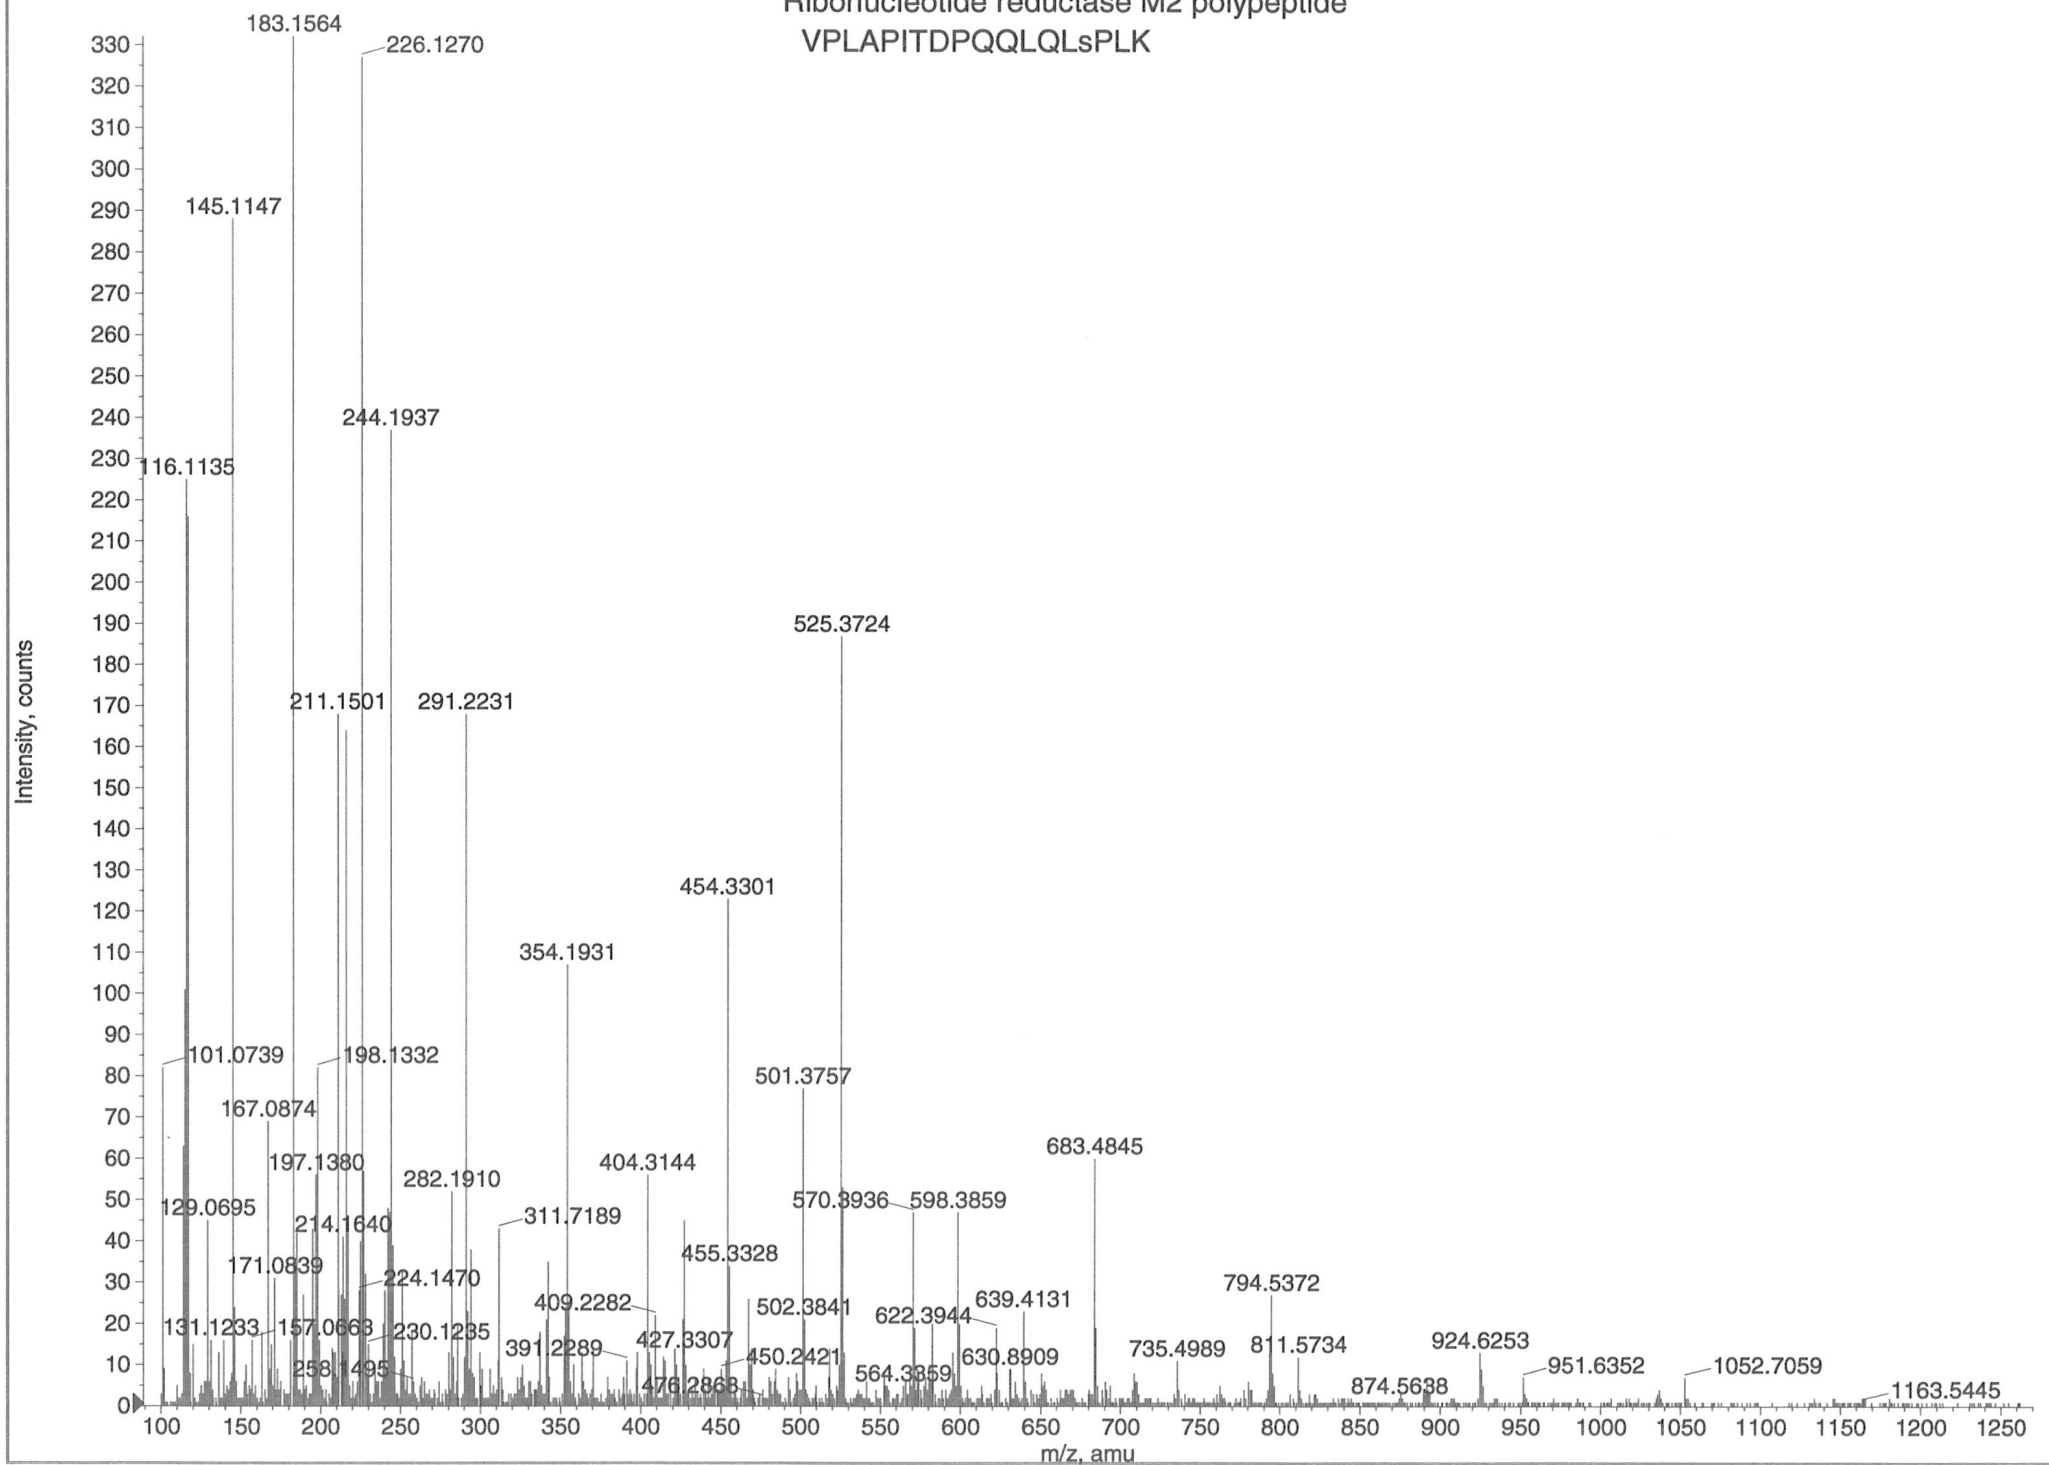

Ribonucleotide reductase M2 polypeptide  
VPLAPITDPQQLQLsPLK

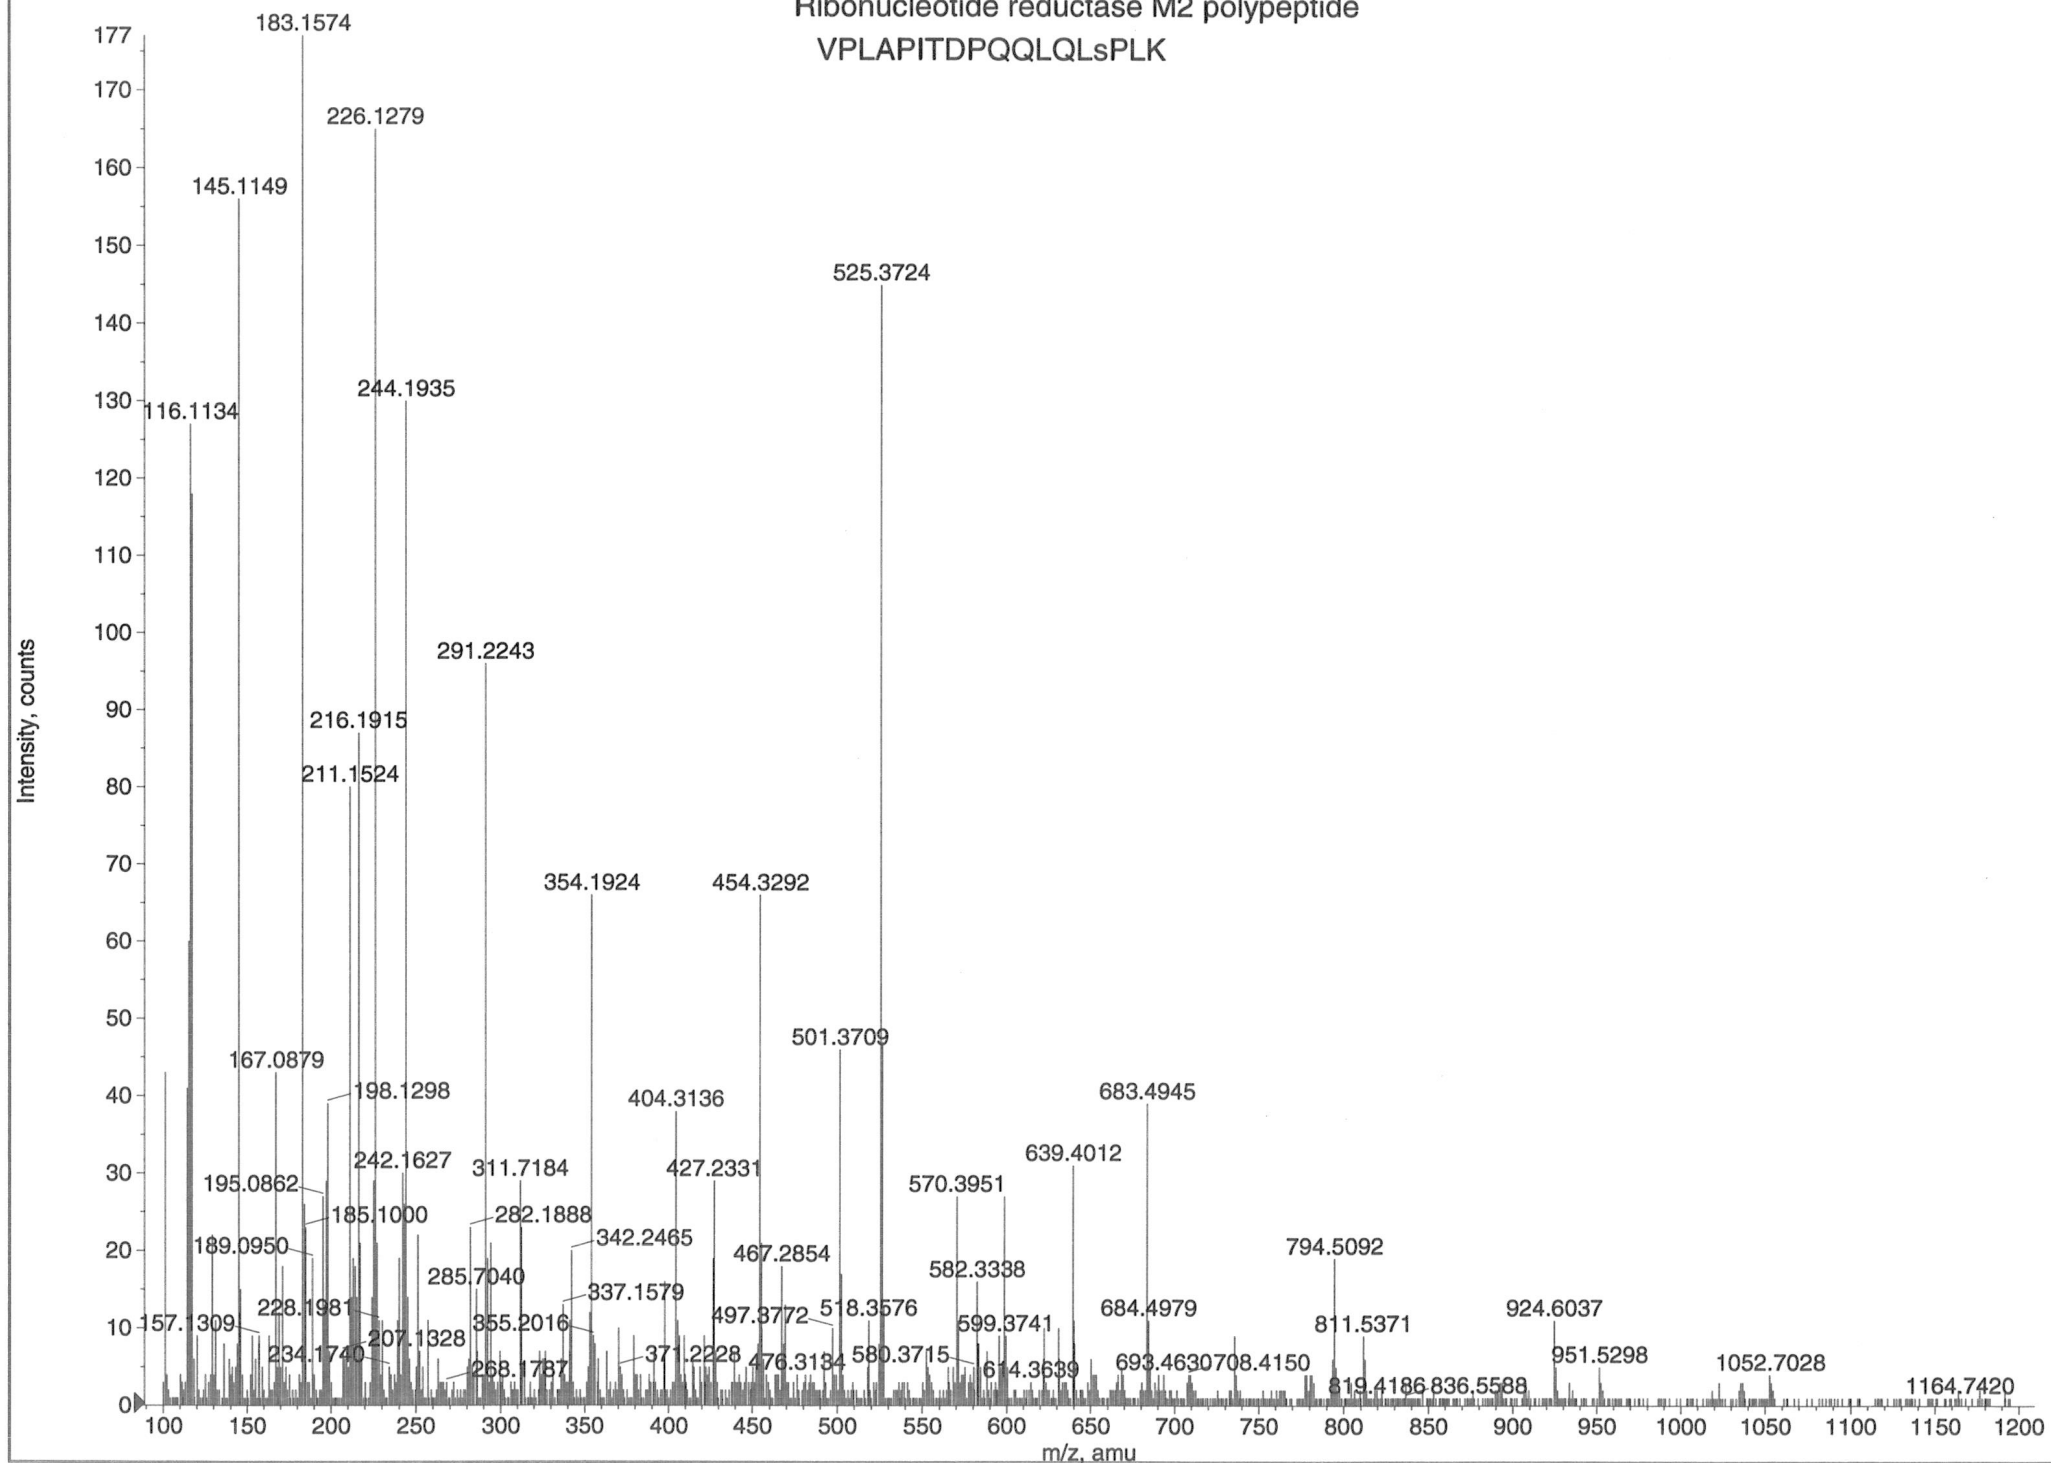

Stearoyl-CoA desaturase  
GSTLDLsDLEAEK

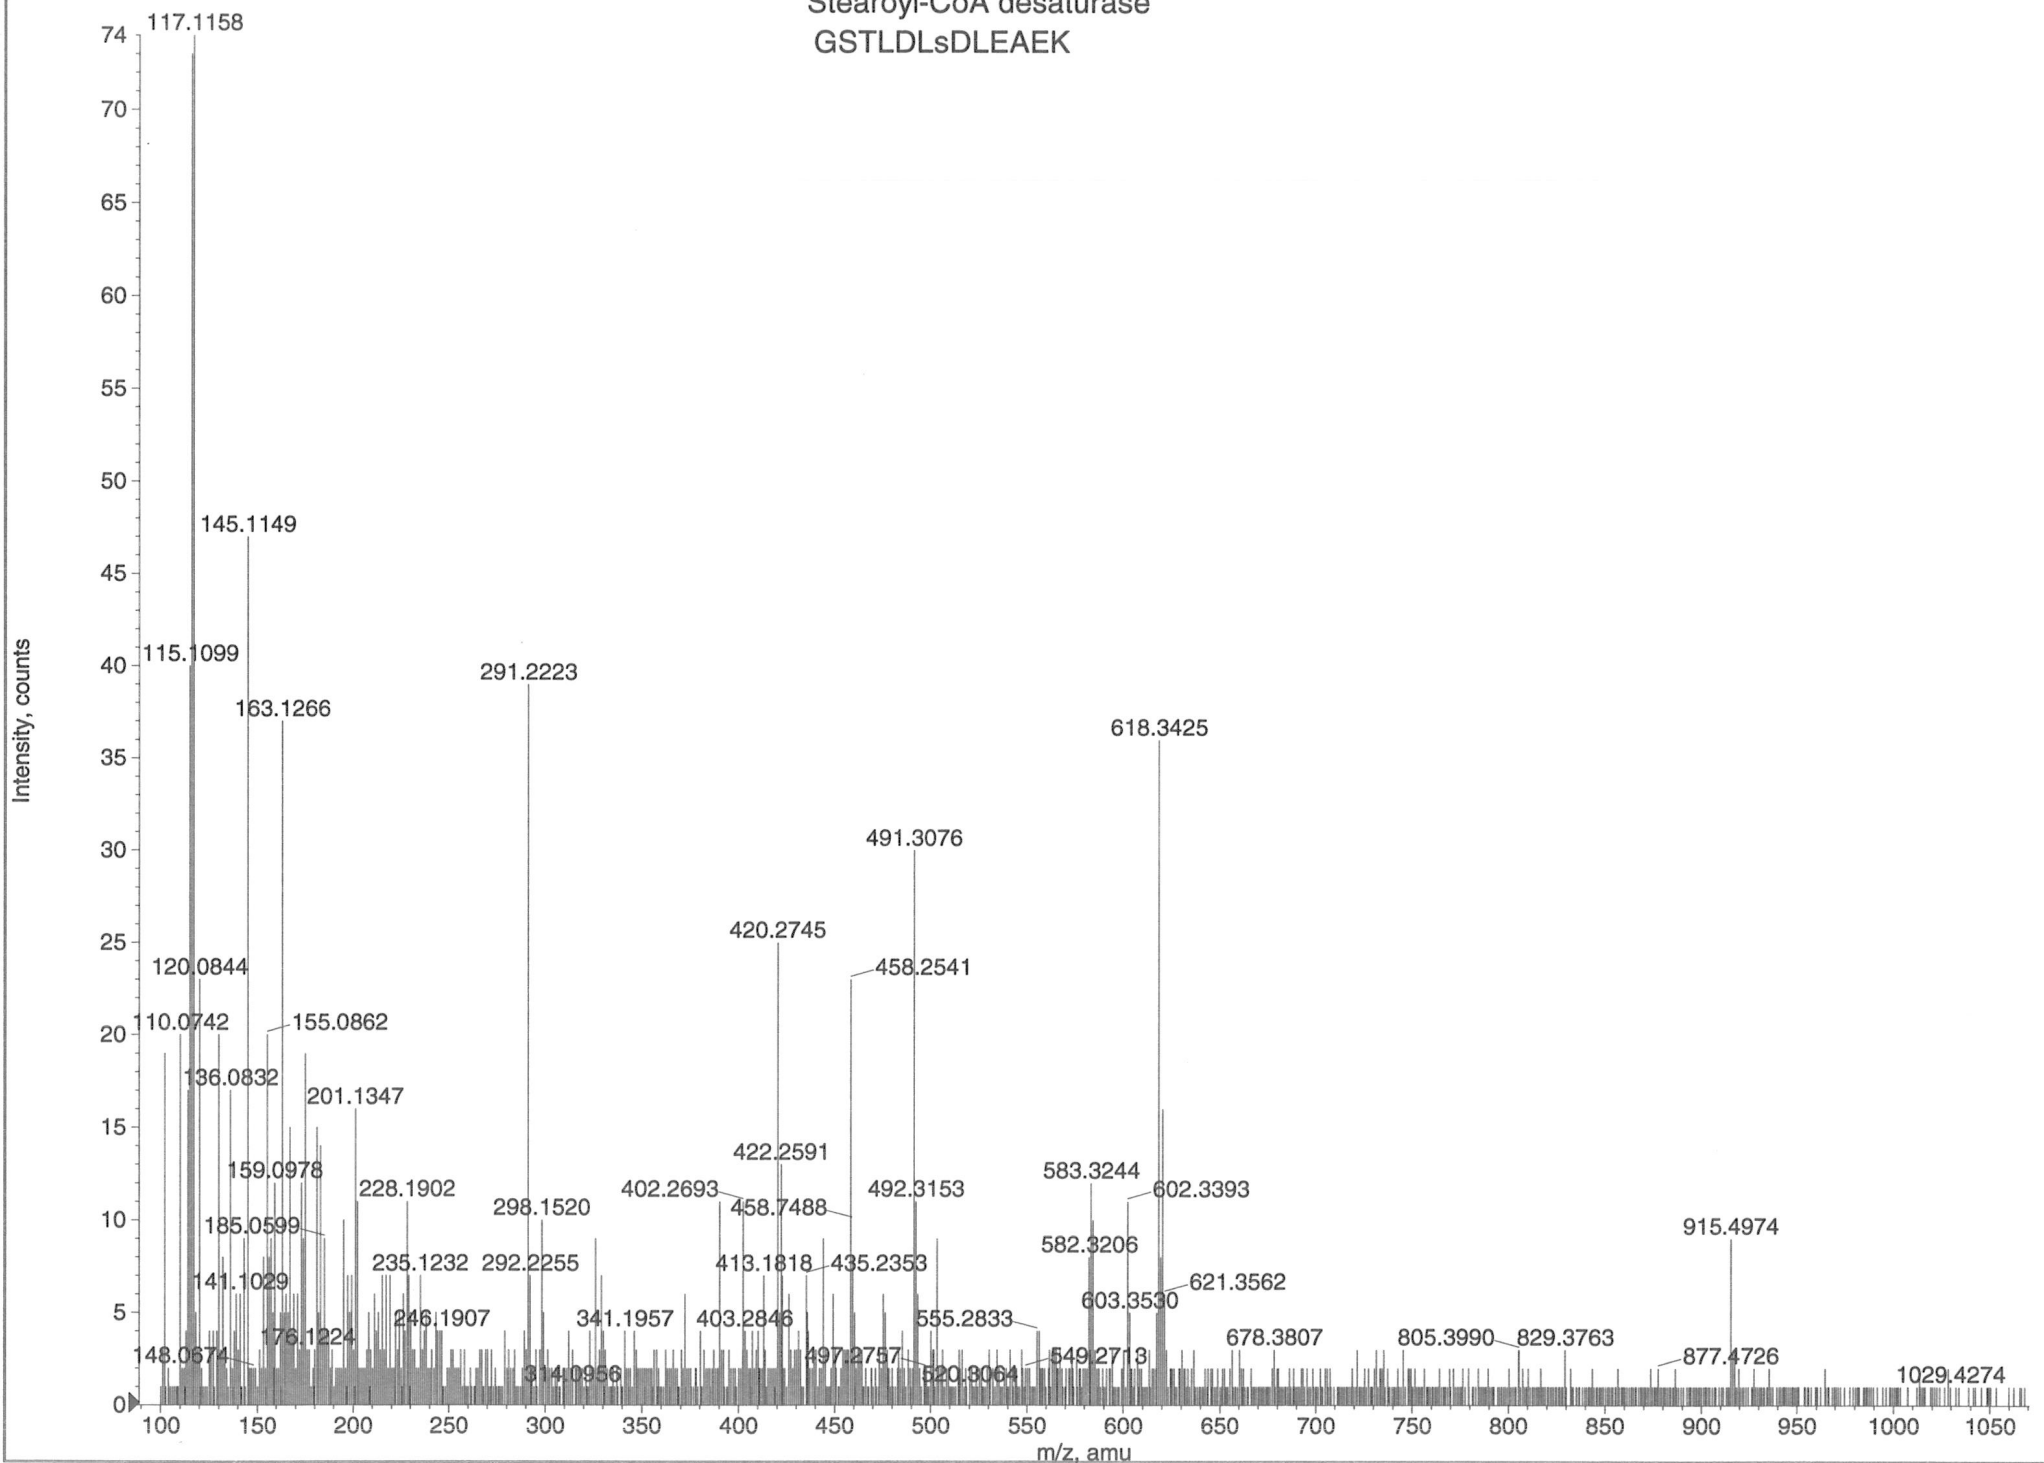

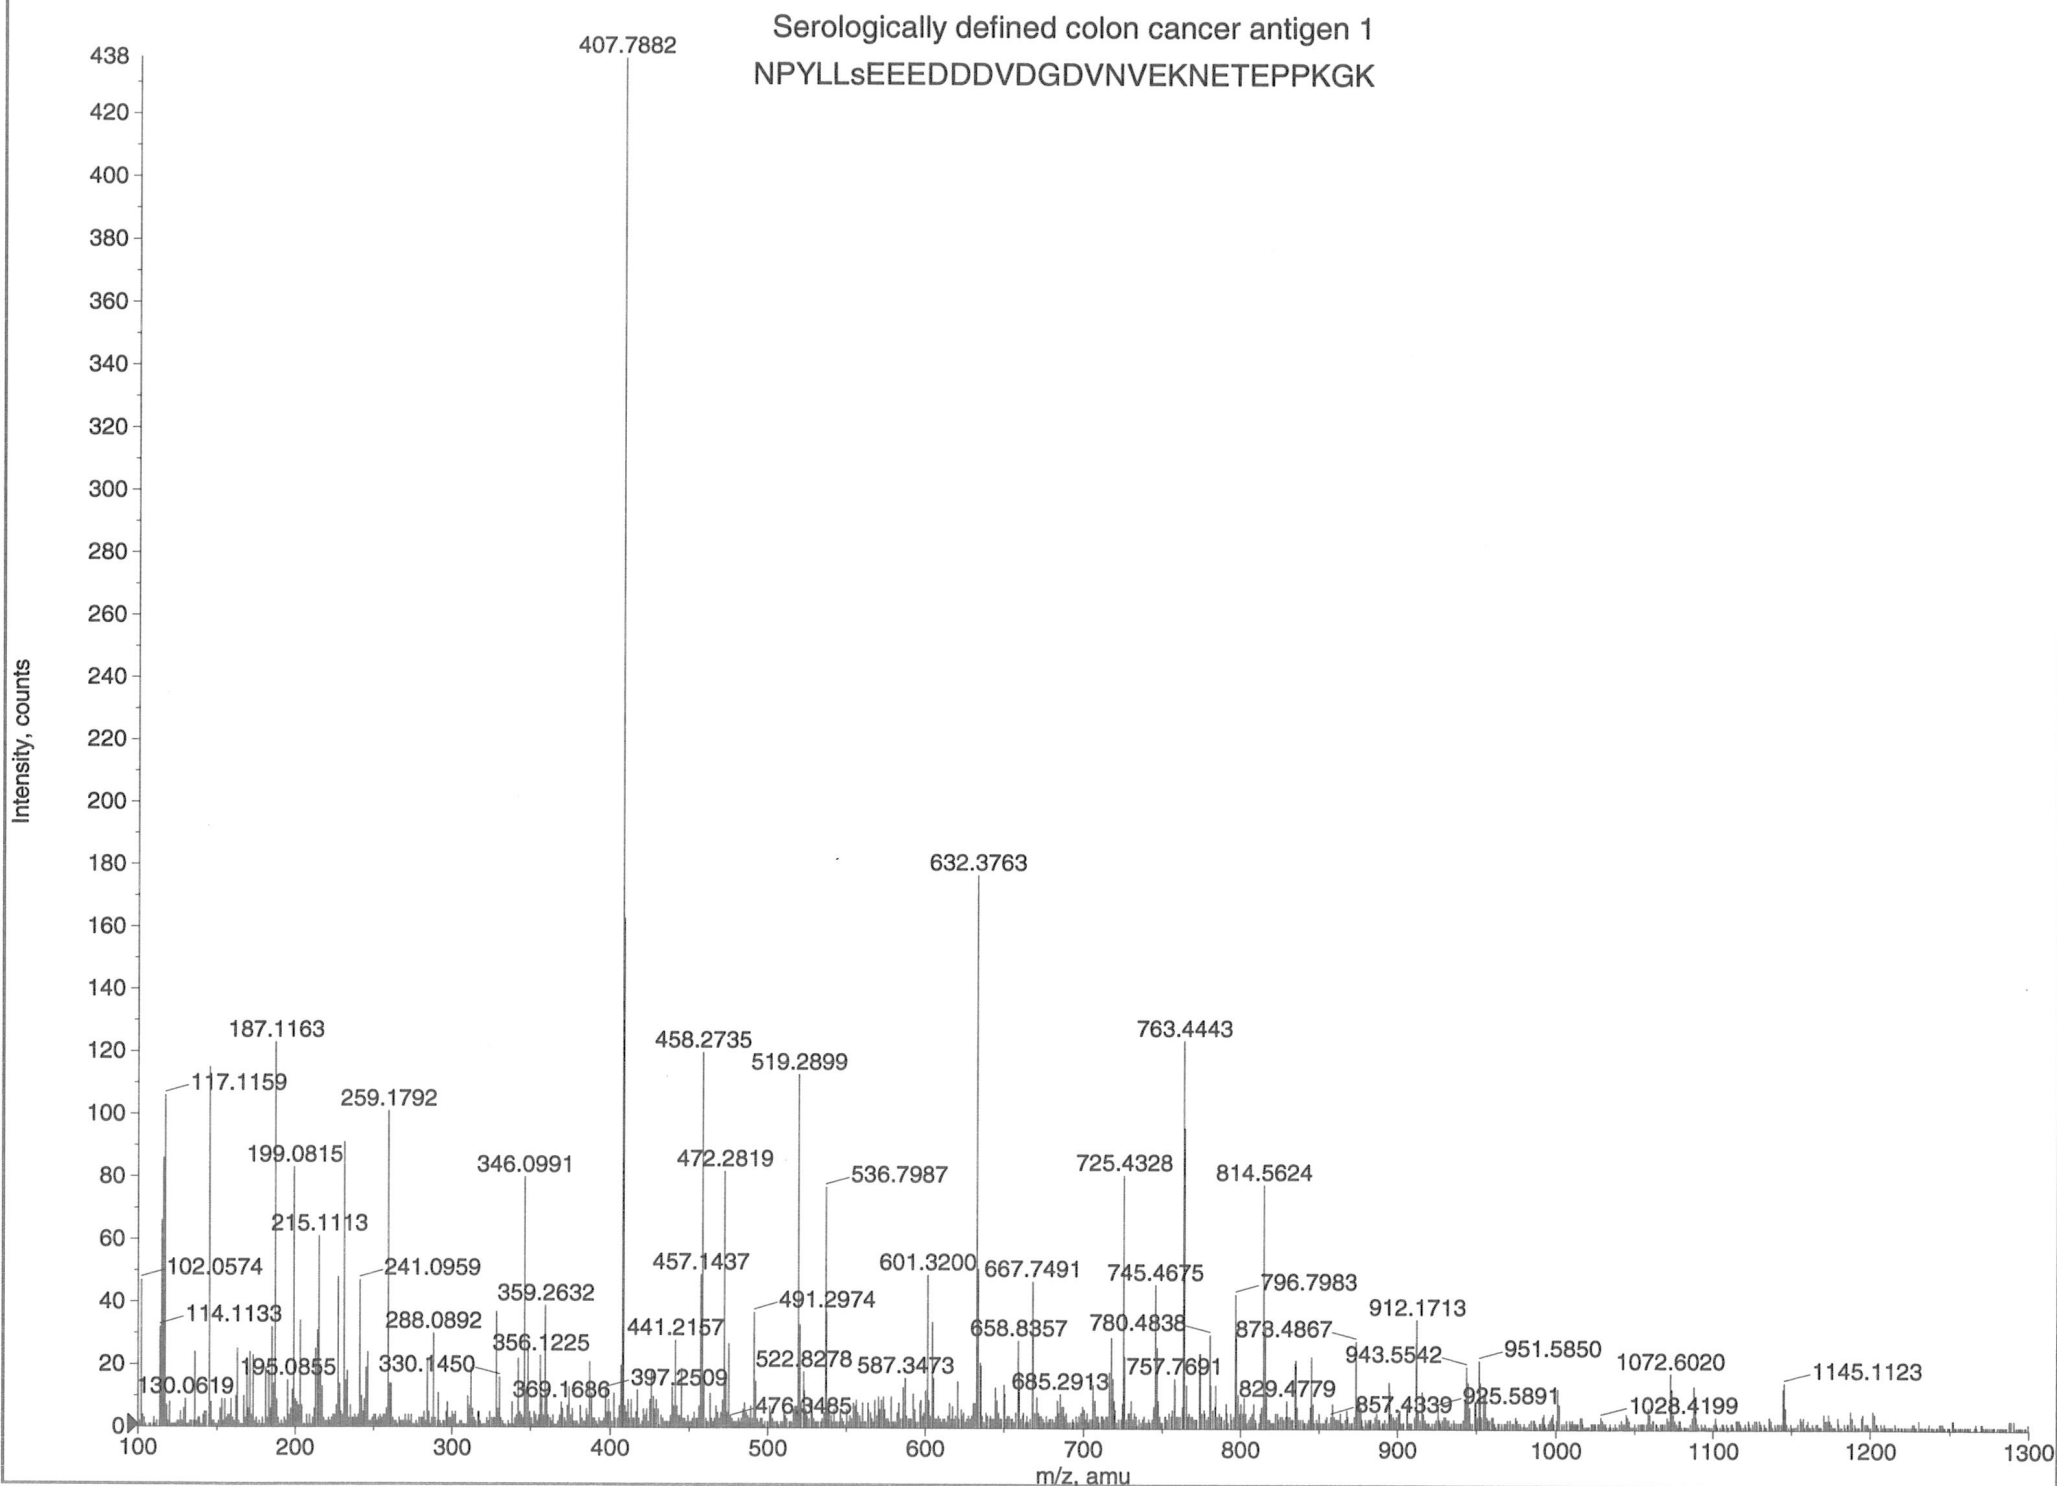

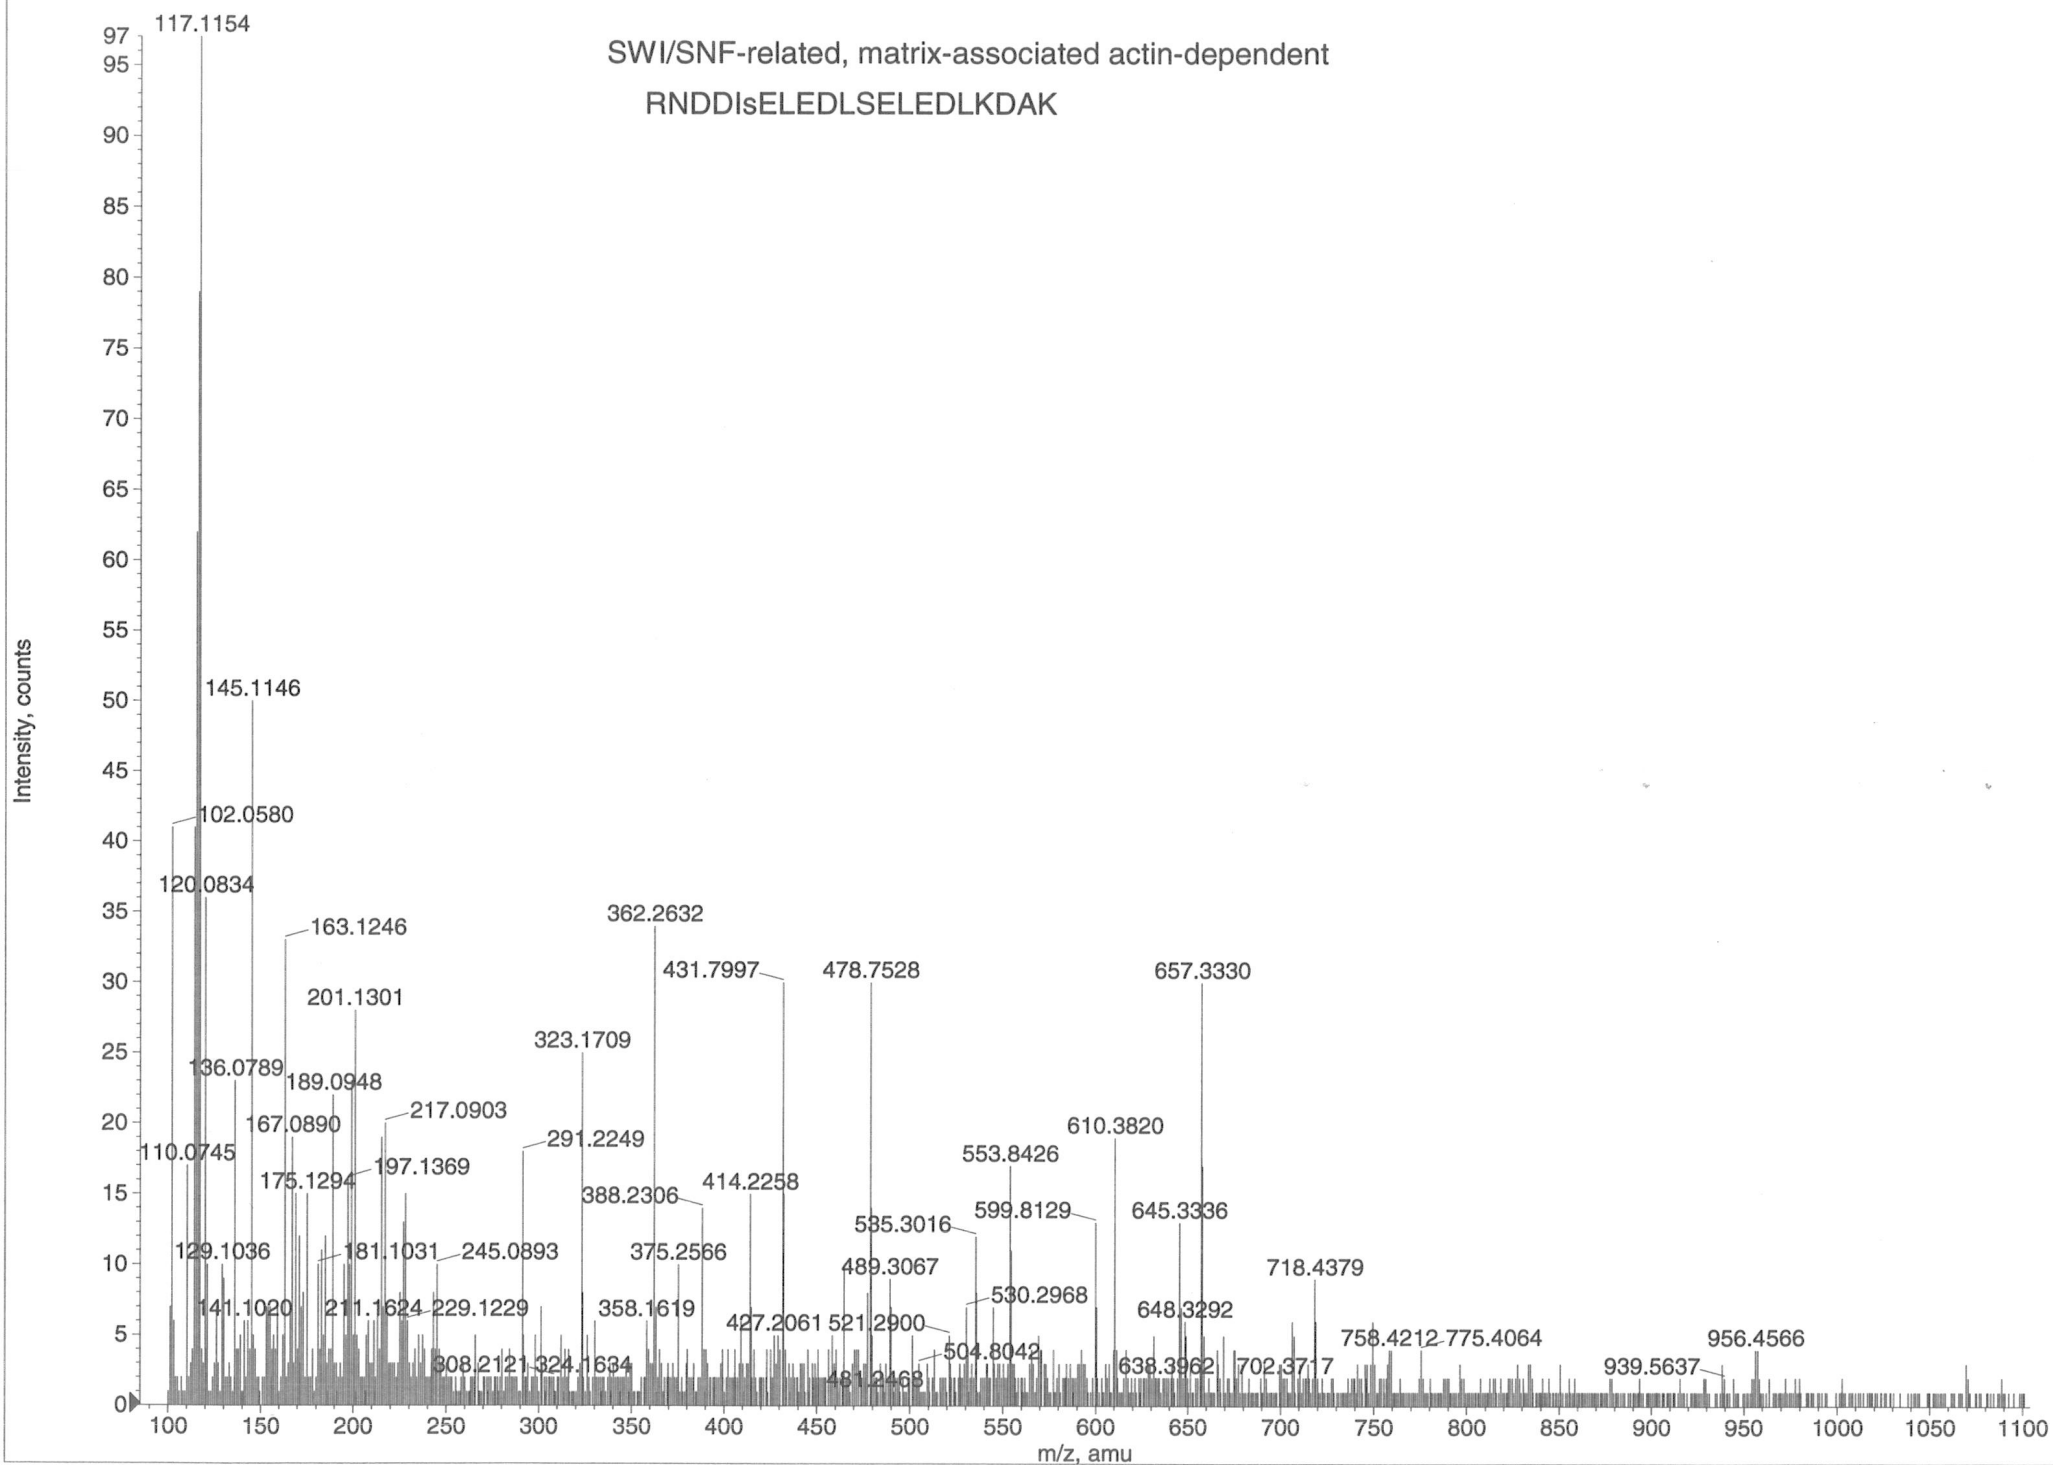



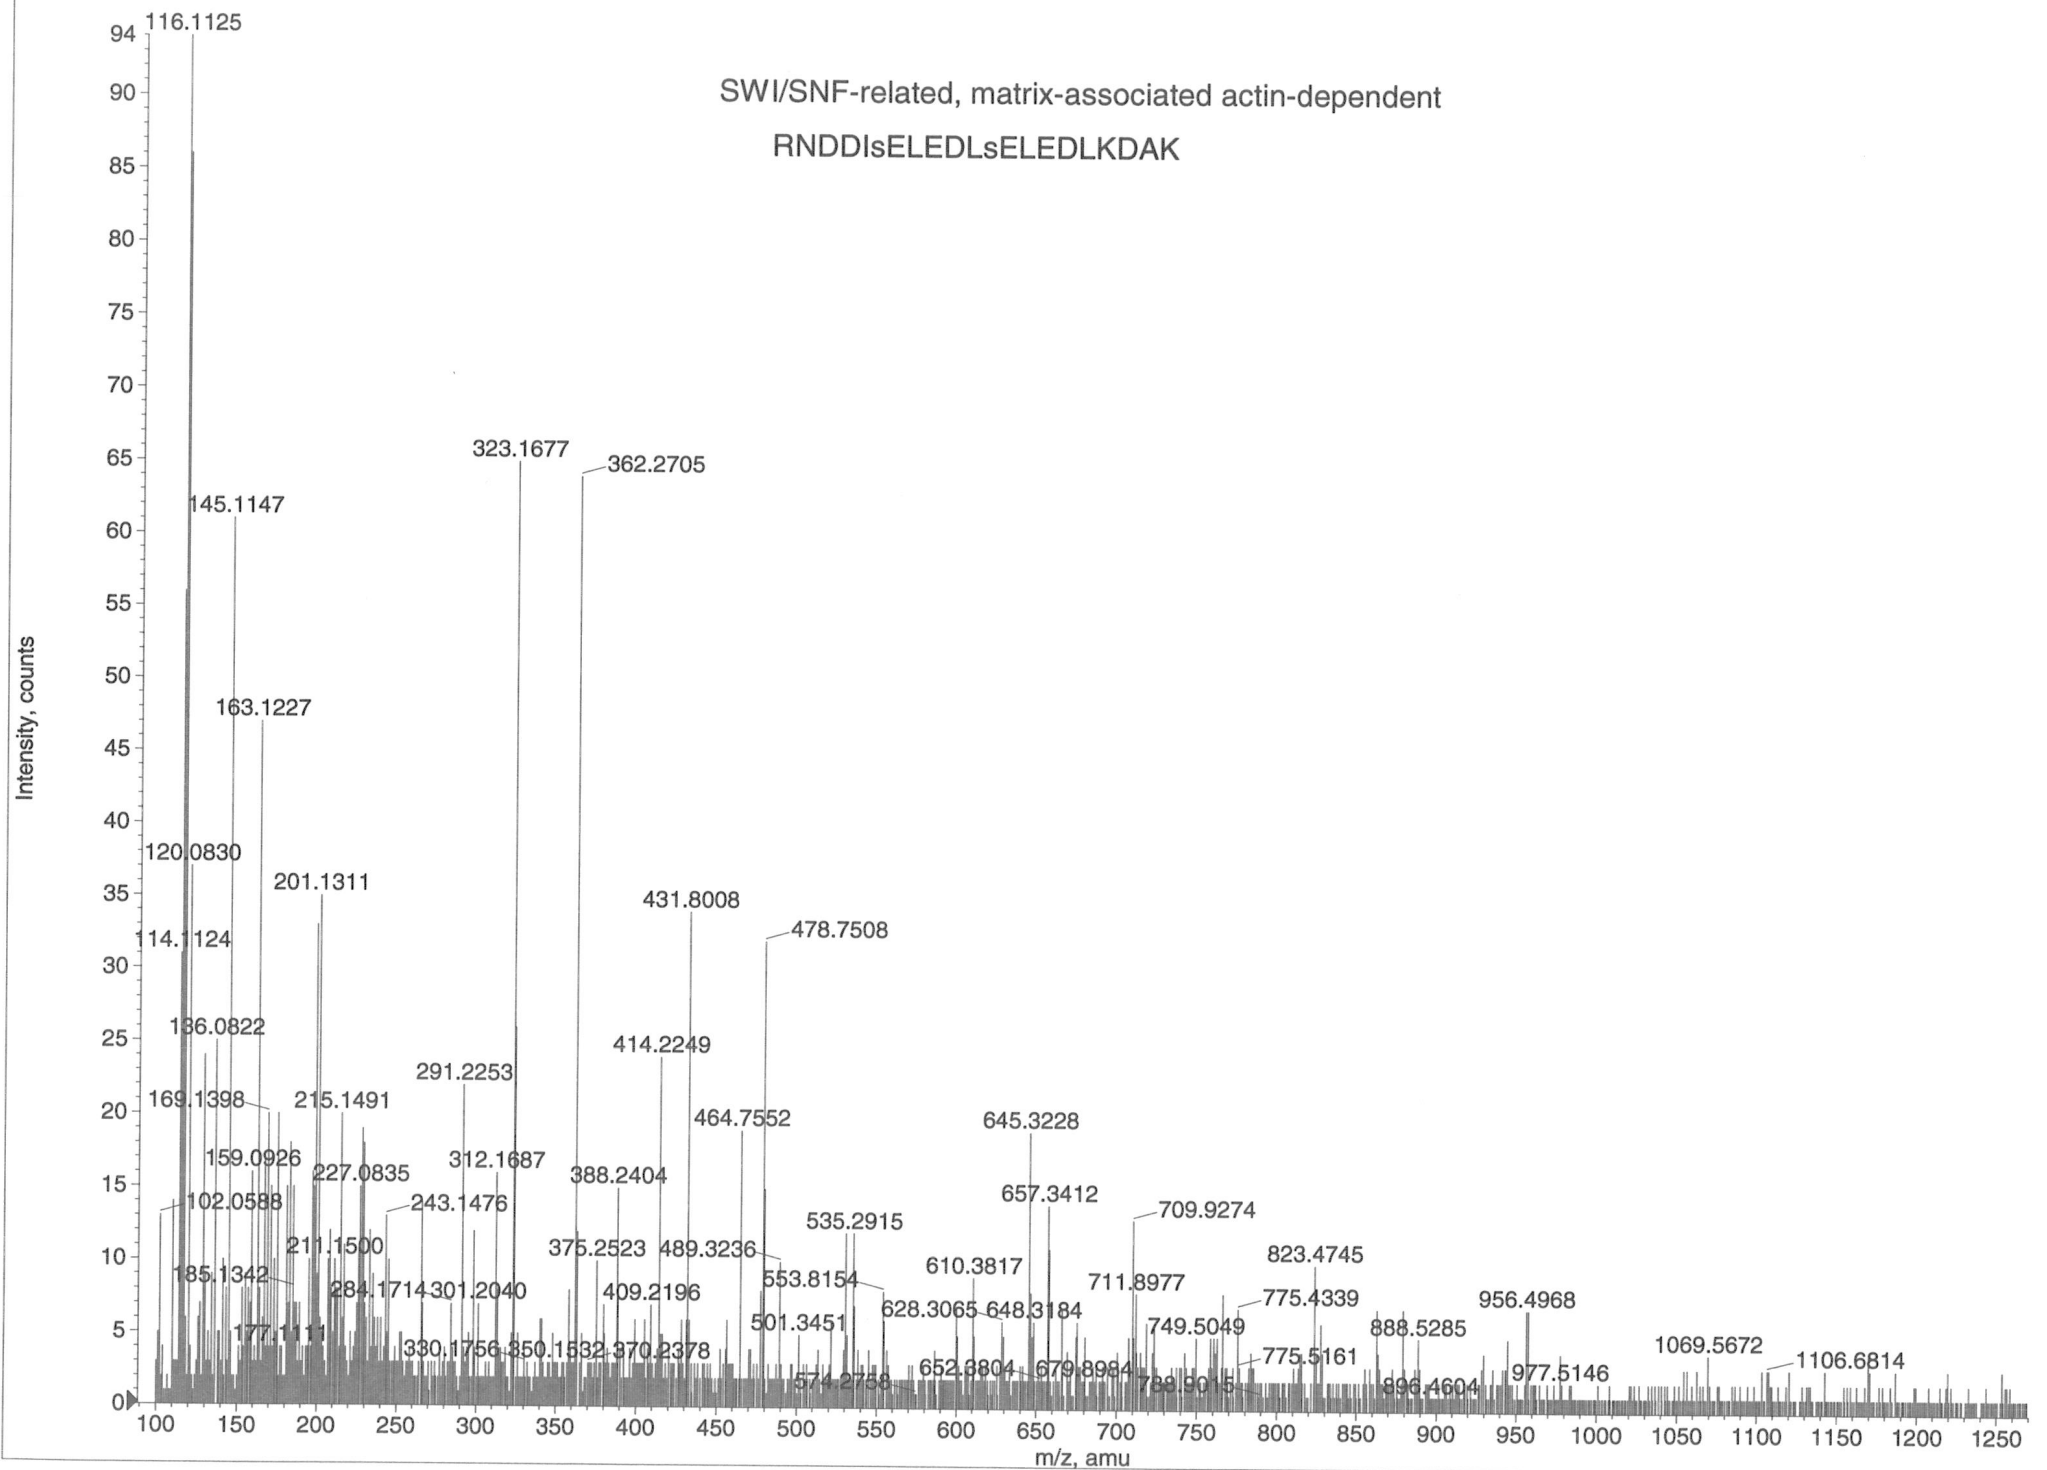

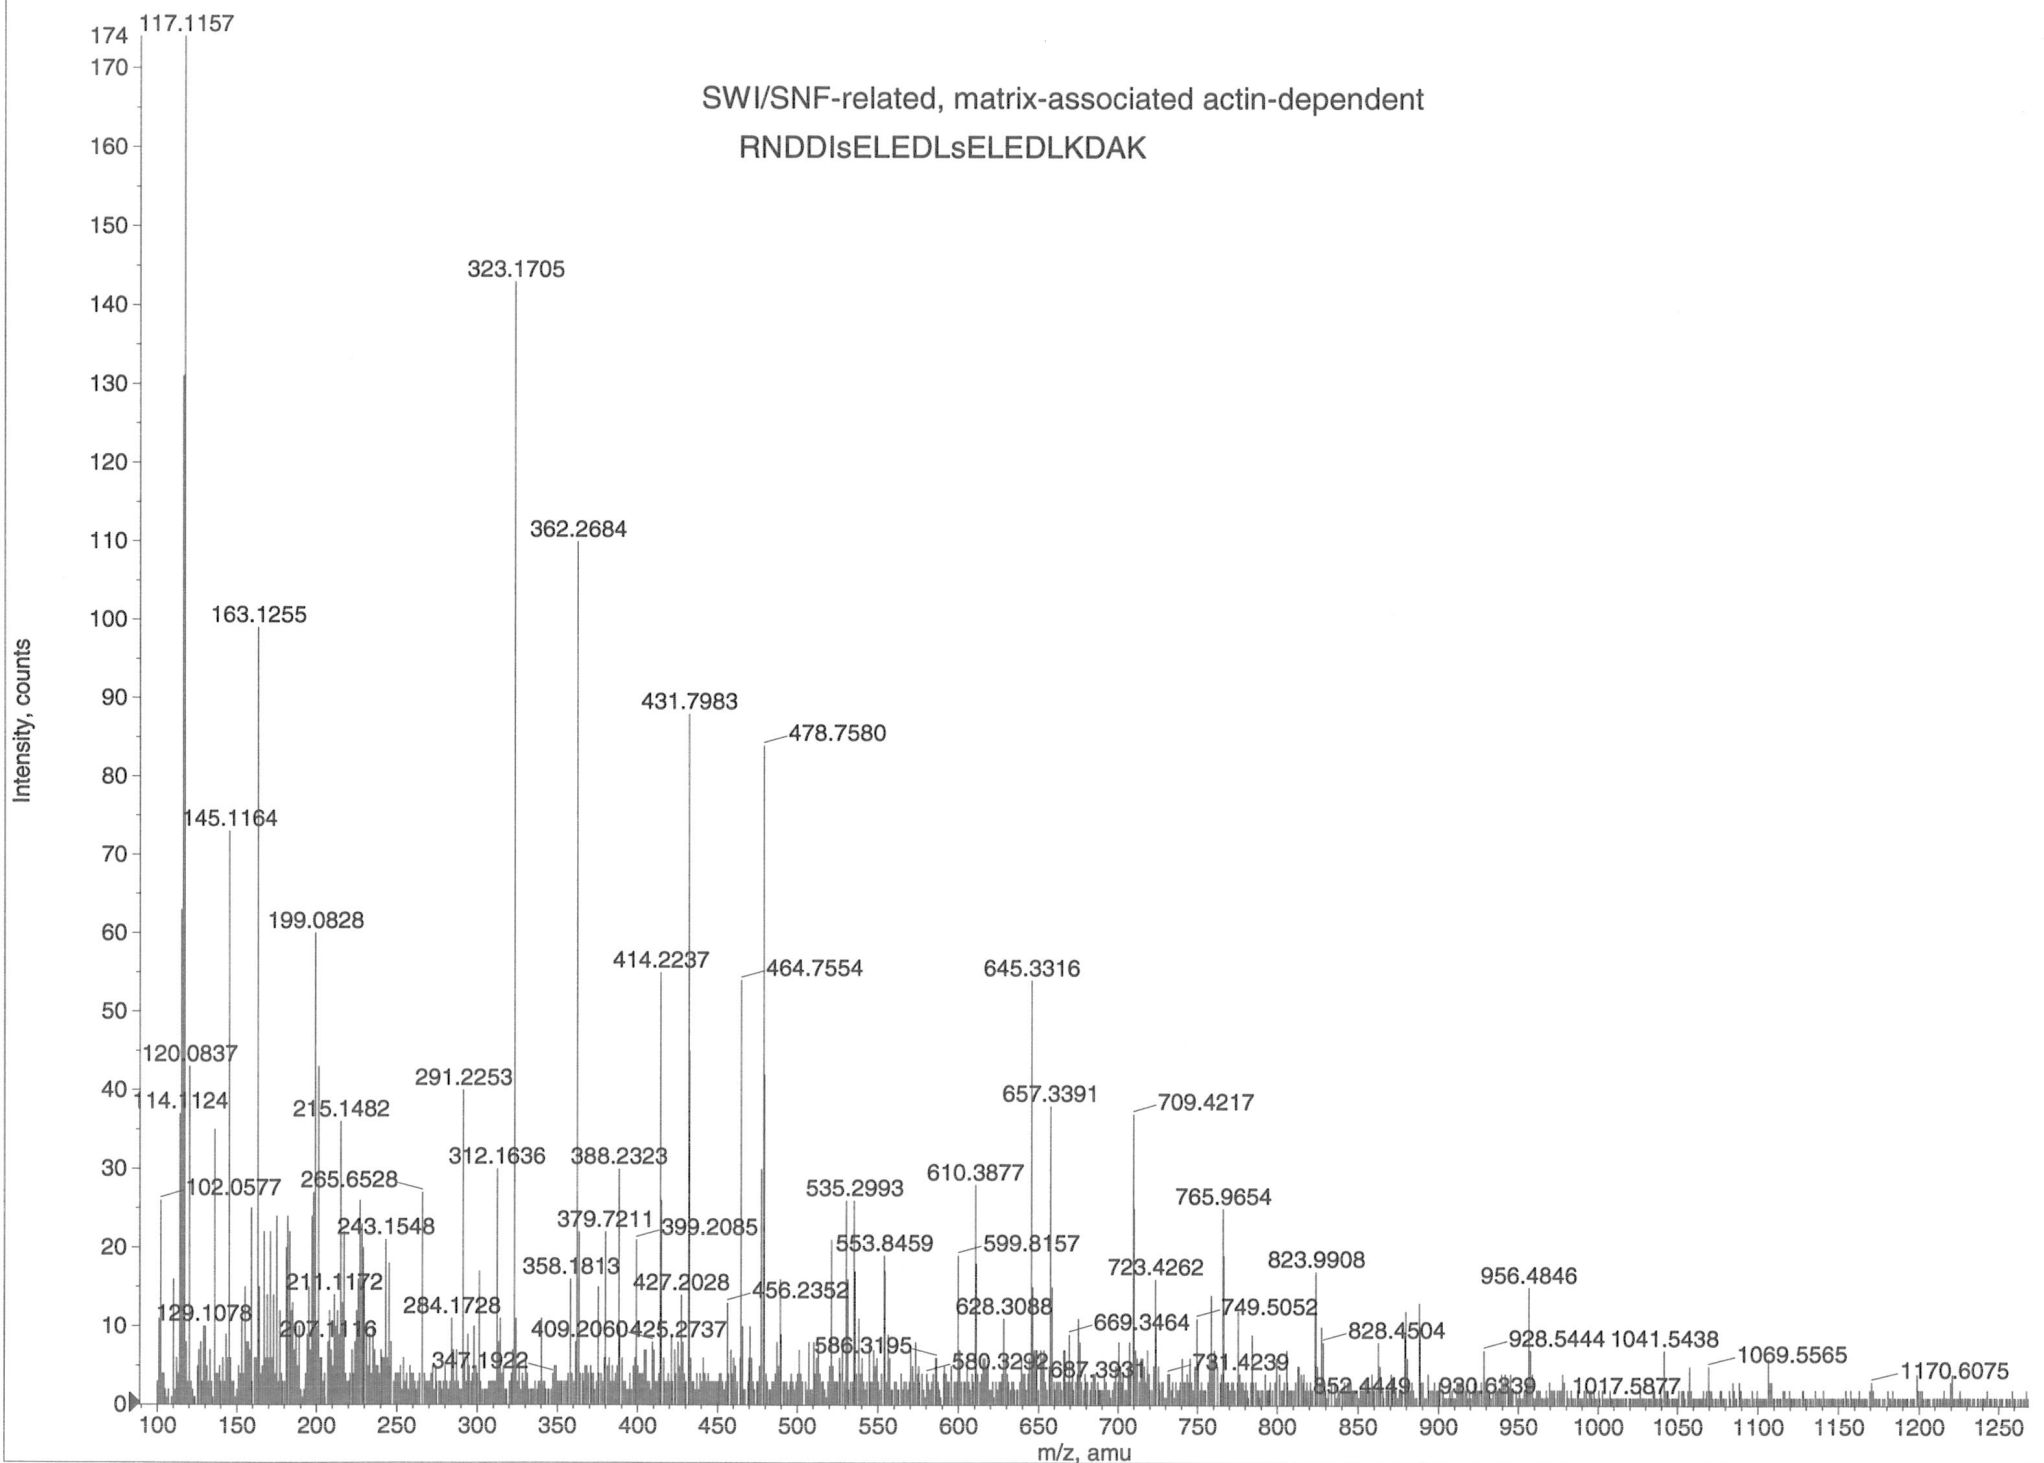

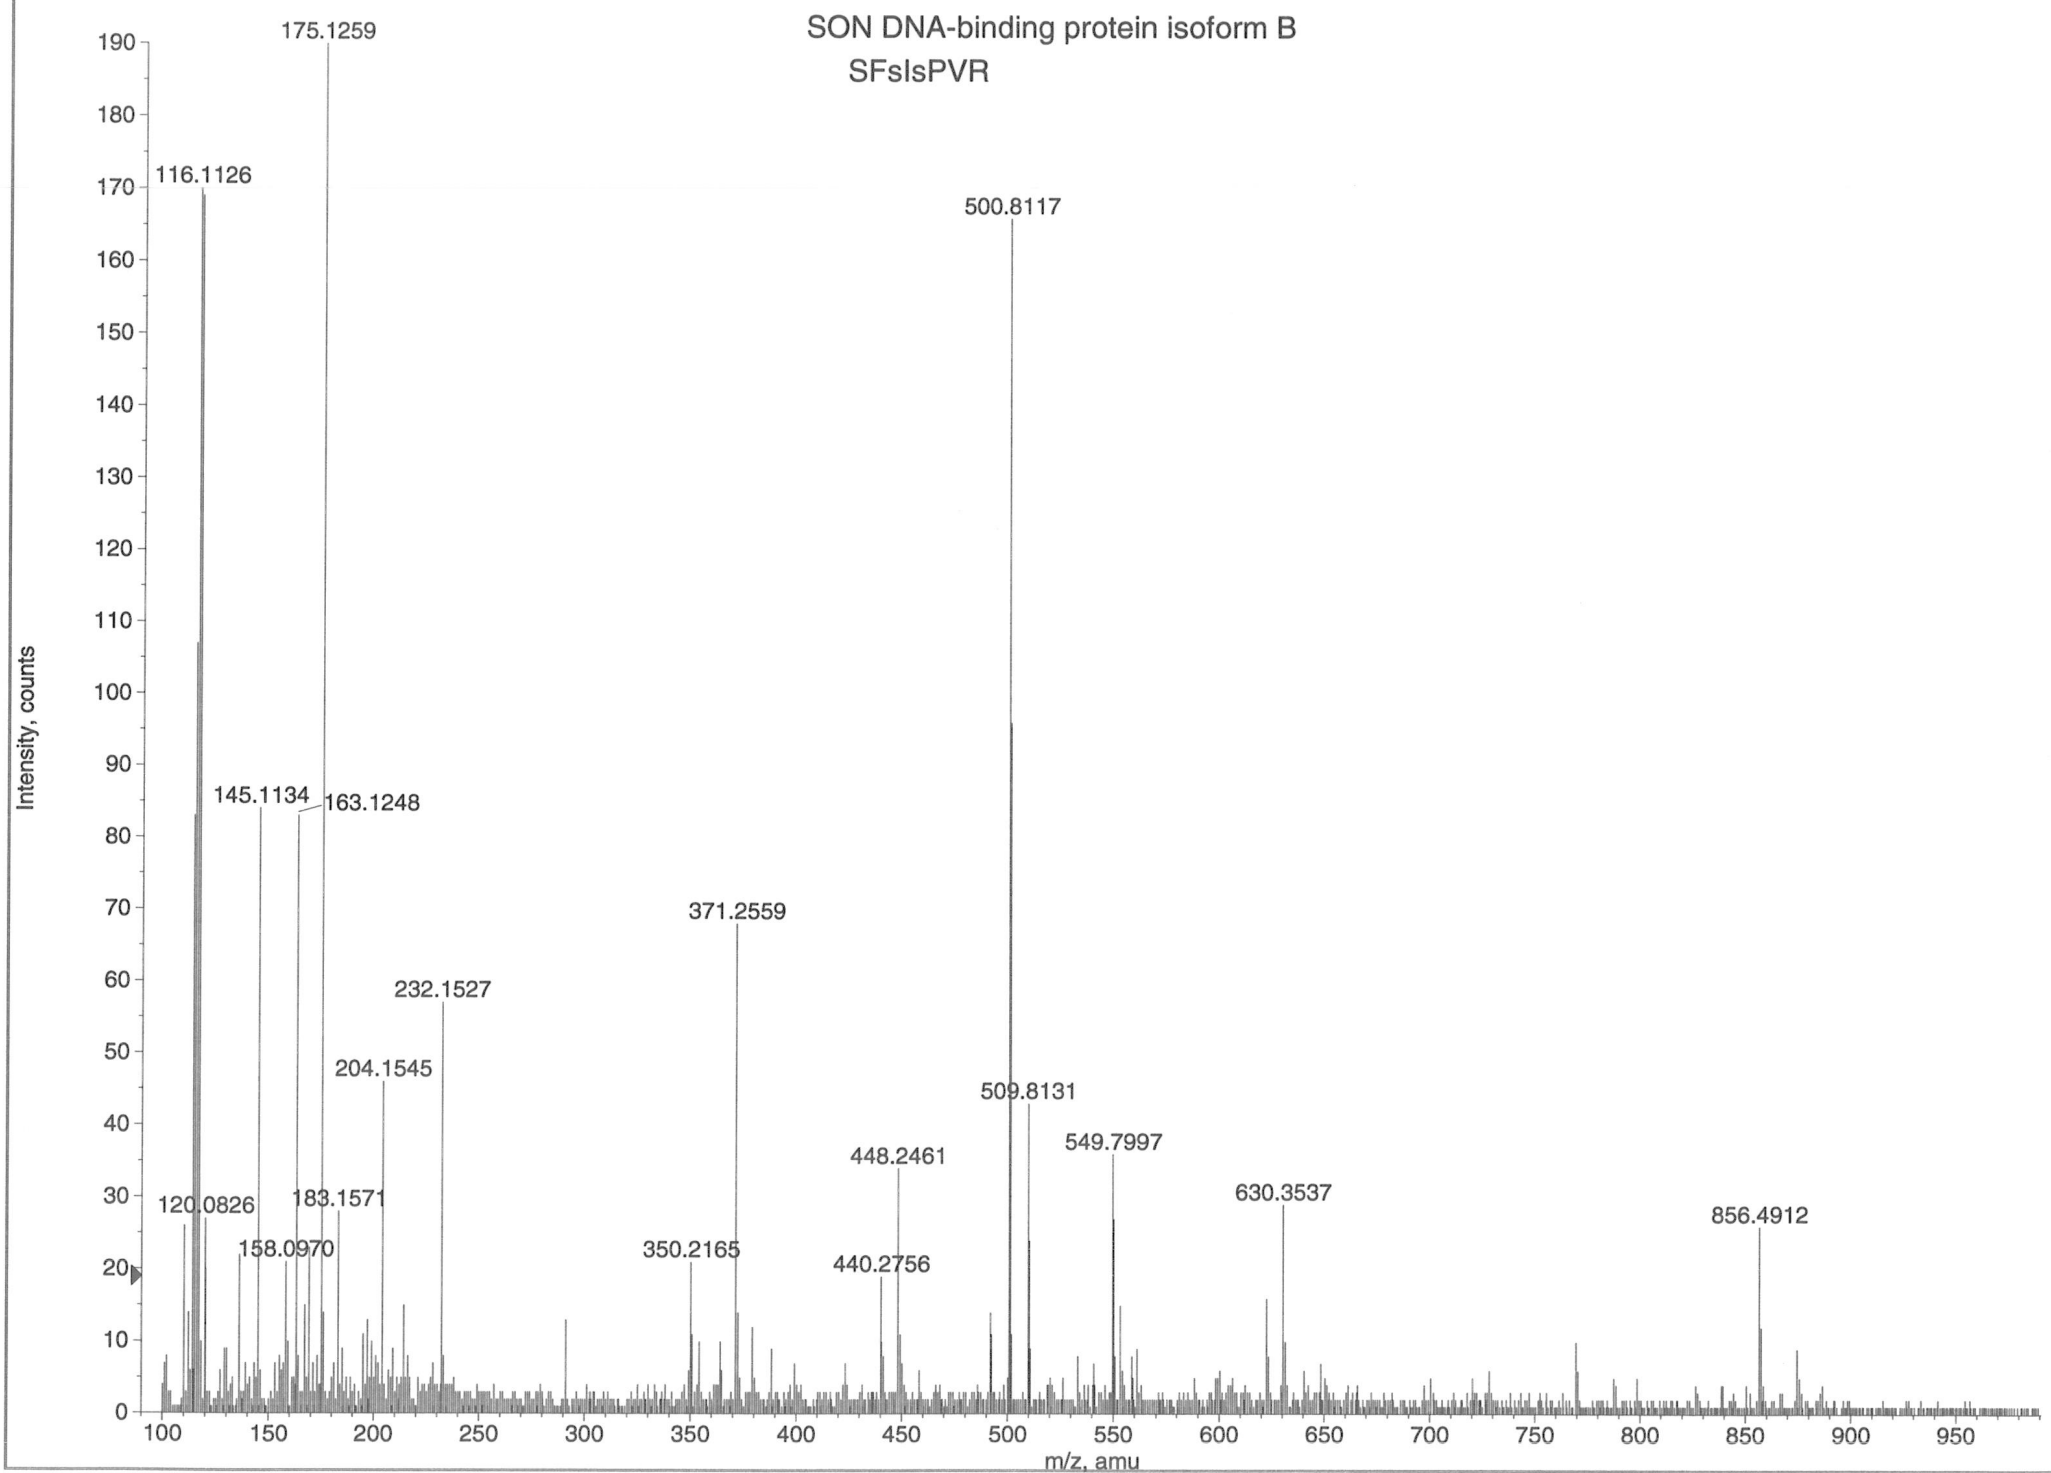

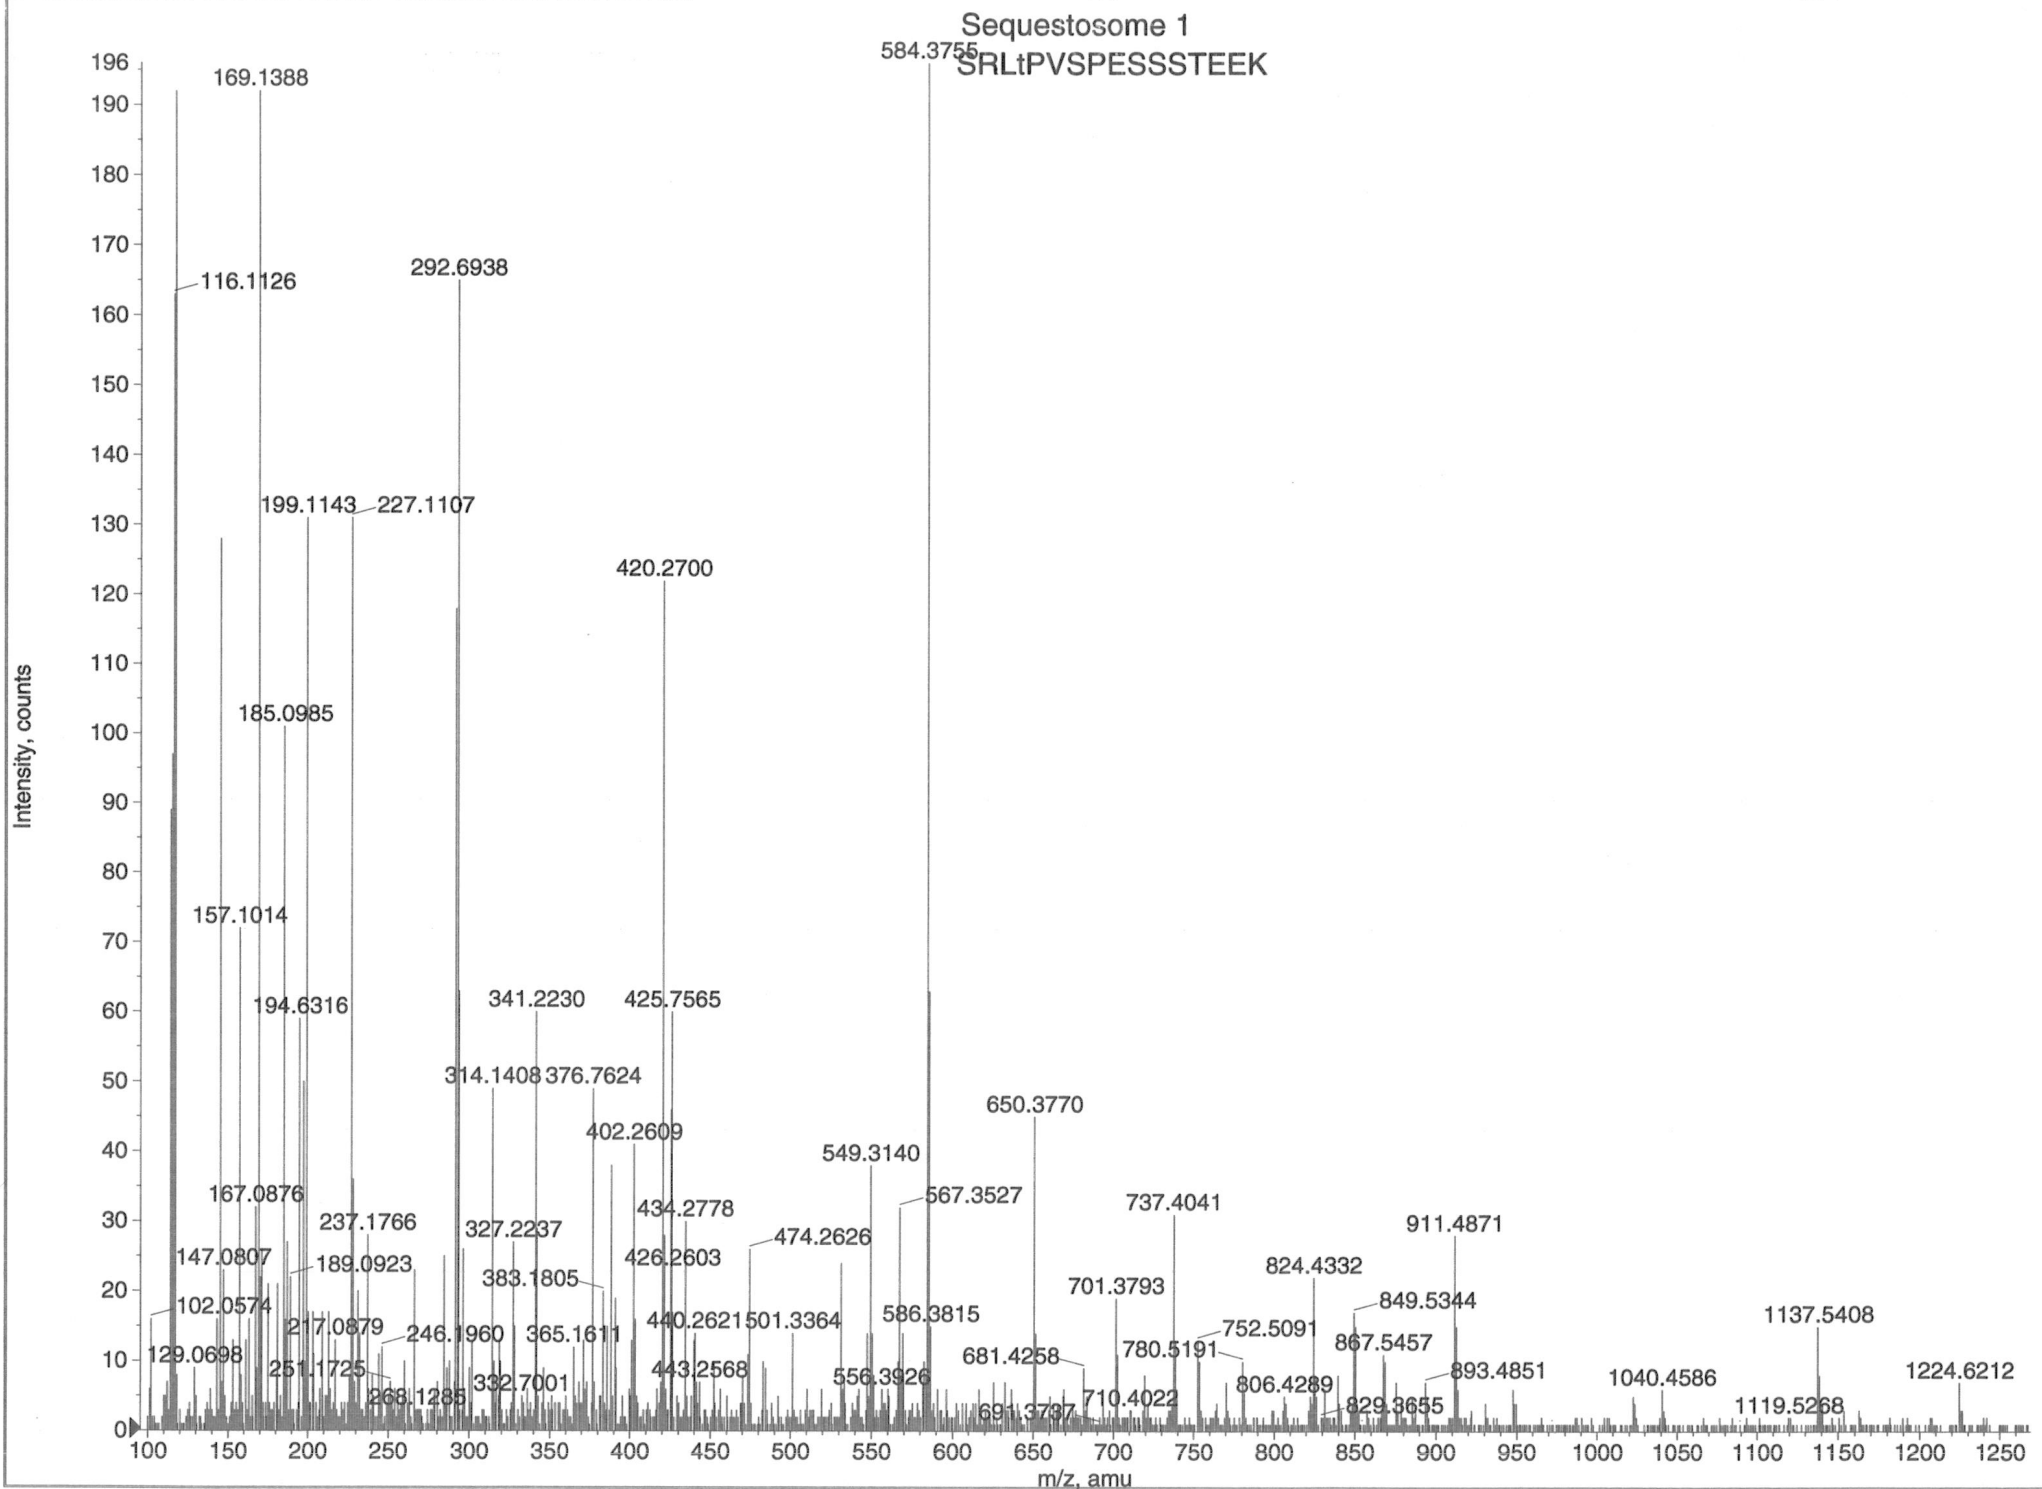

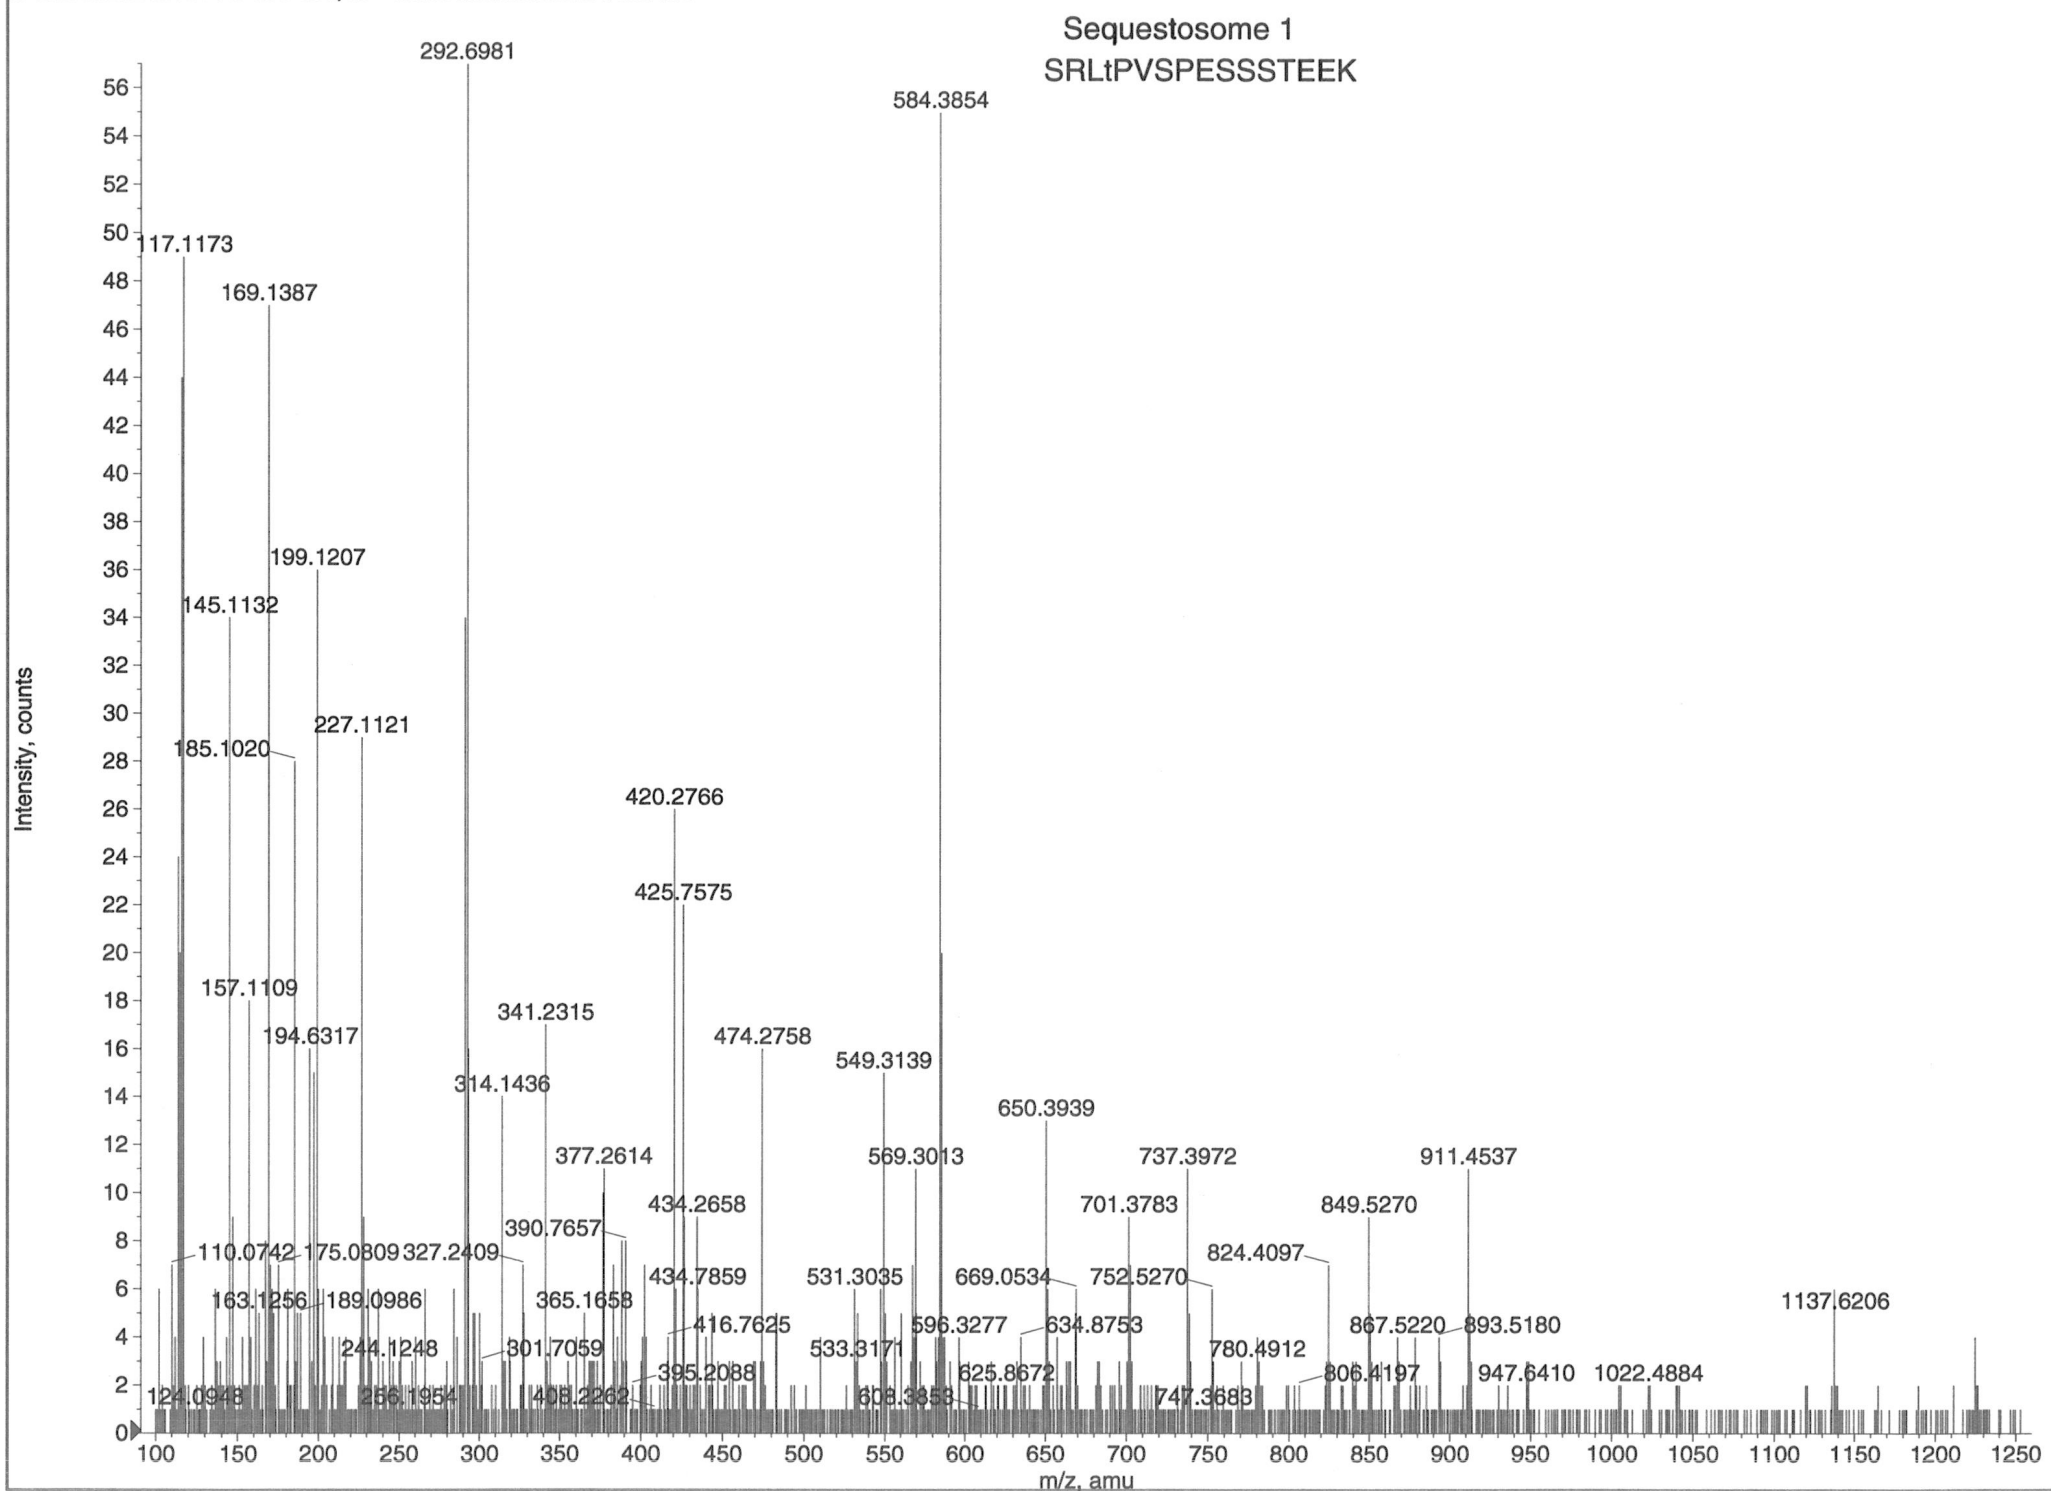

Sequestosome 1  
SRLtPVsPESSSTEEK

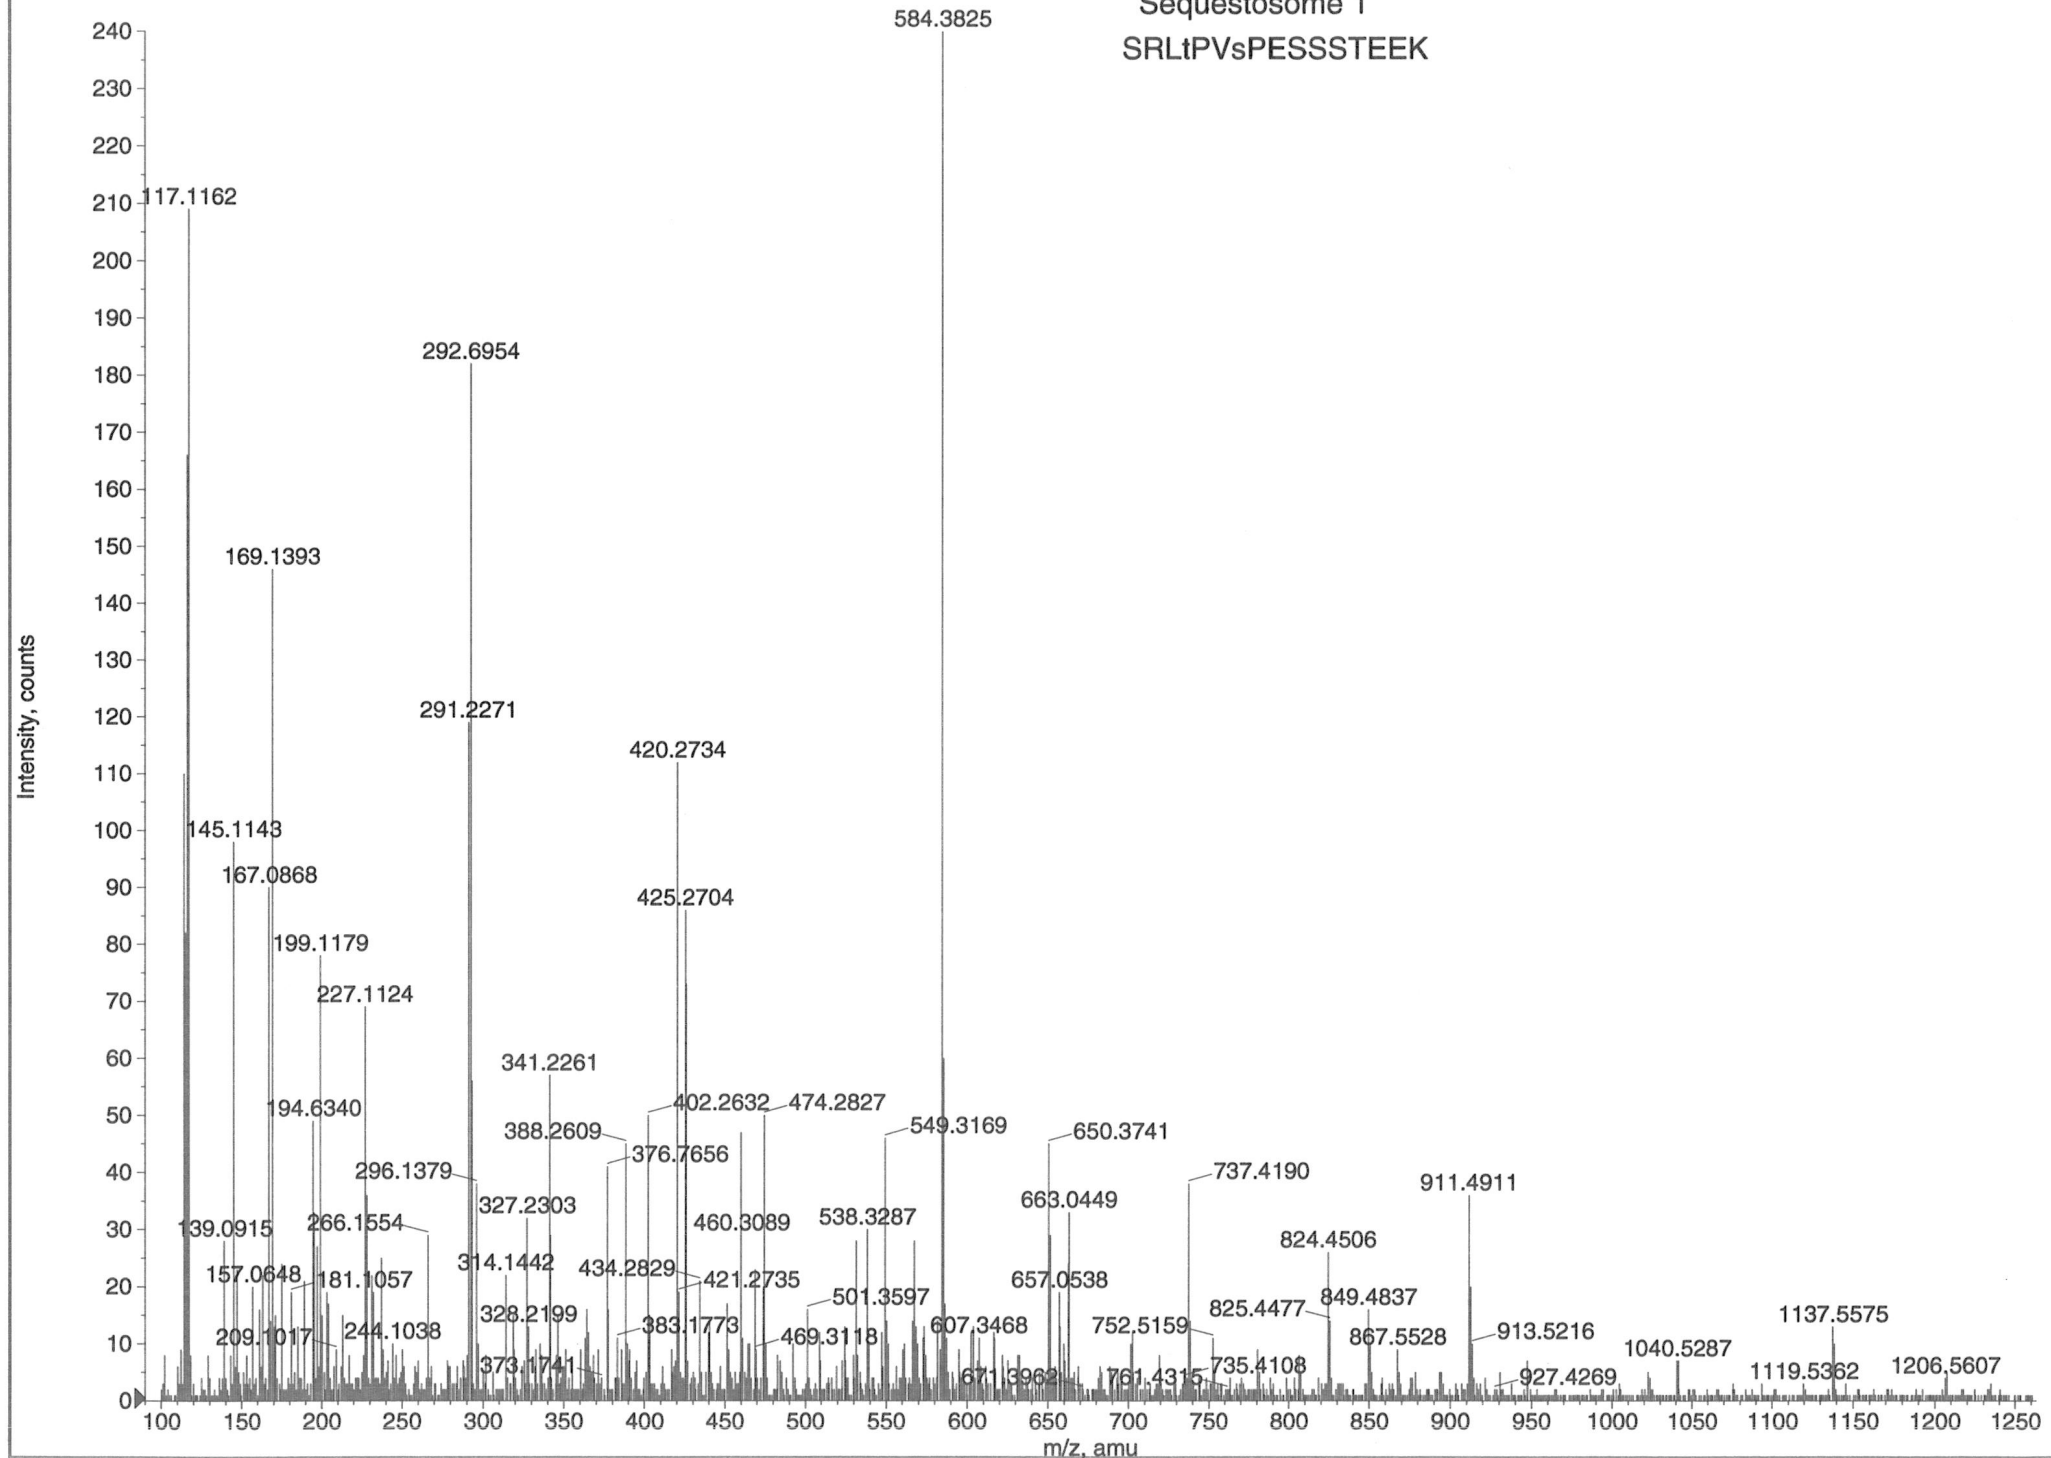

Sequestosome 1  
SRLtPVsPESSSTEEK

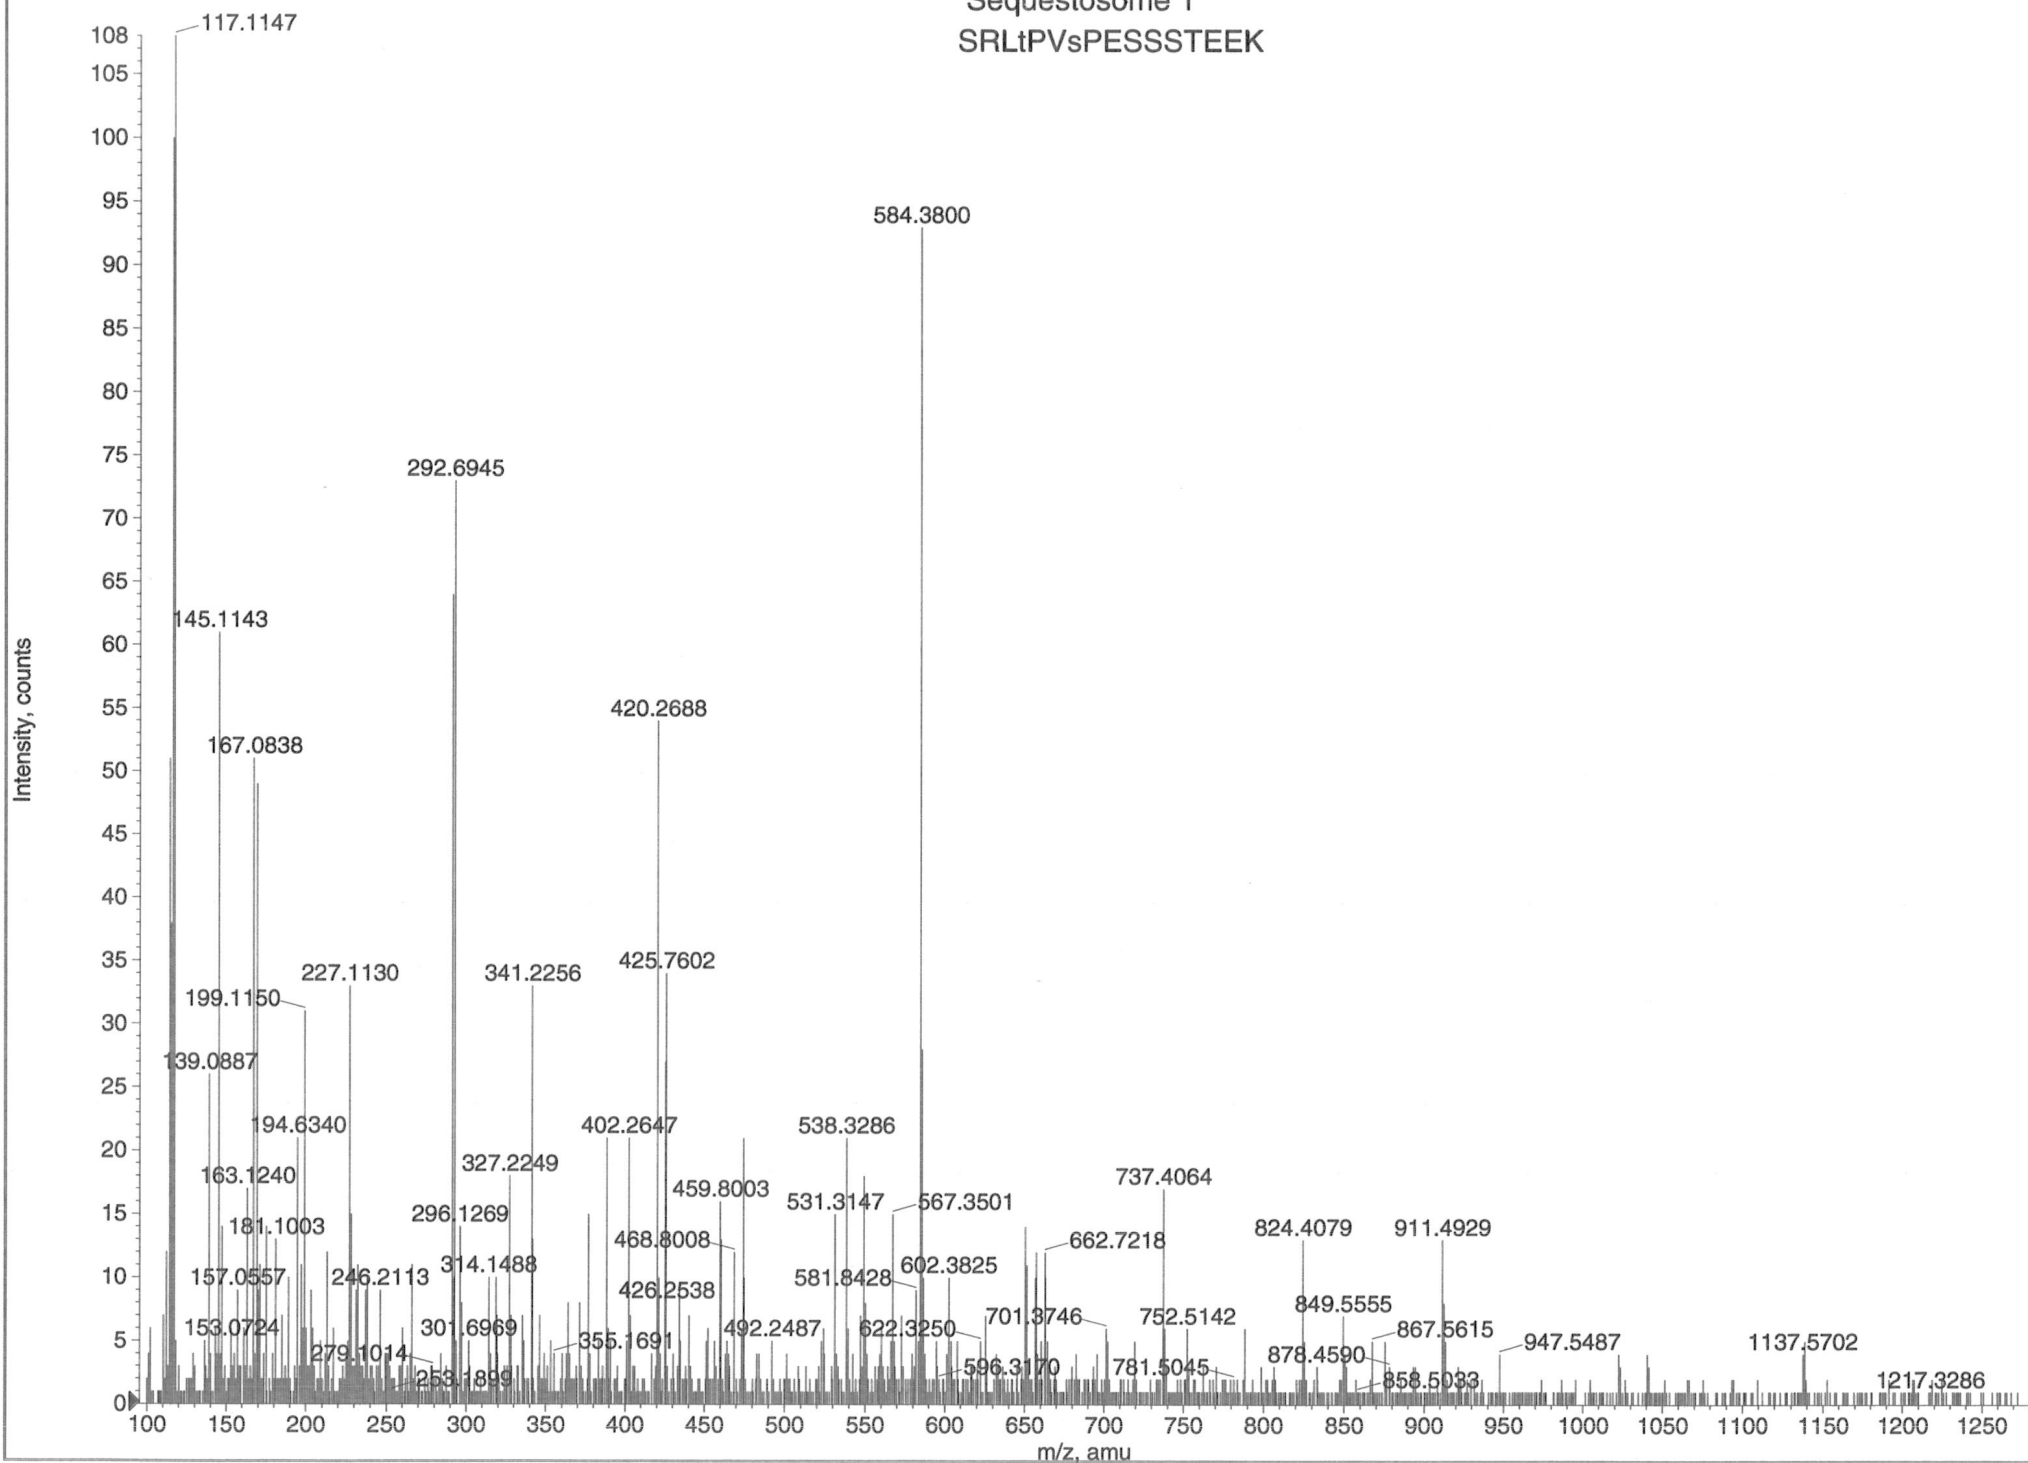

Splicing coactivator subunit SRm300  
GEFSA<sub>s</sub>PMLK

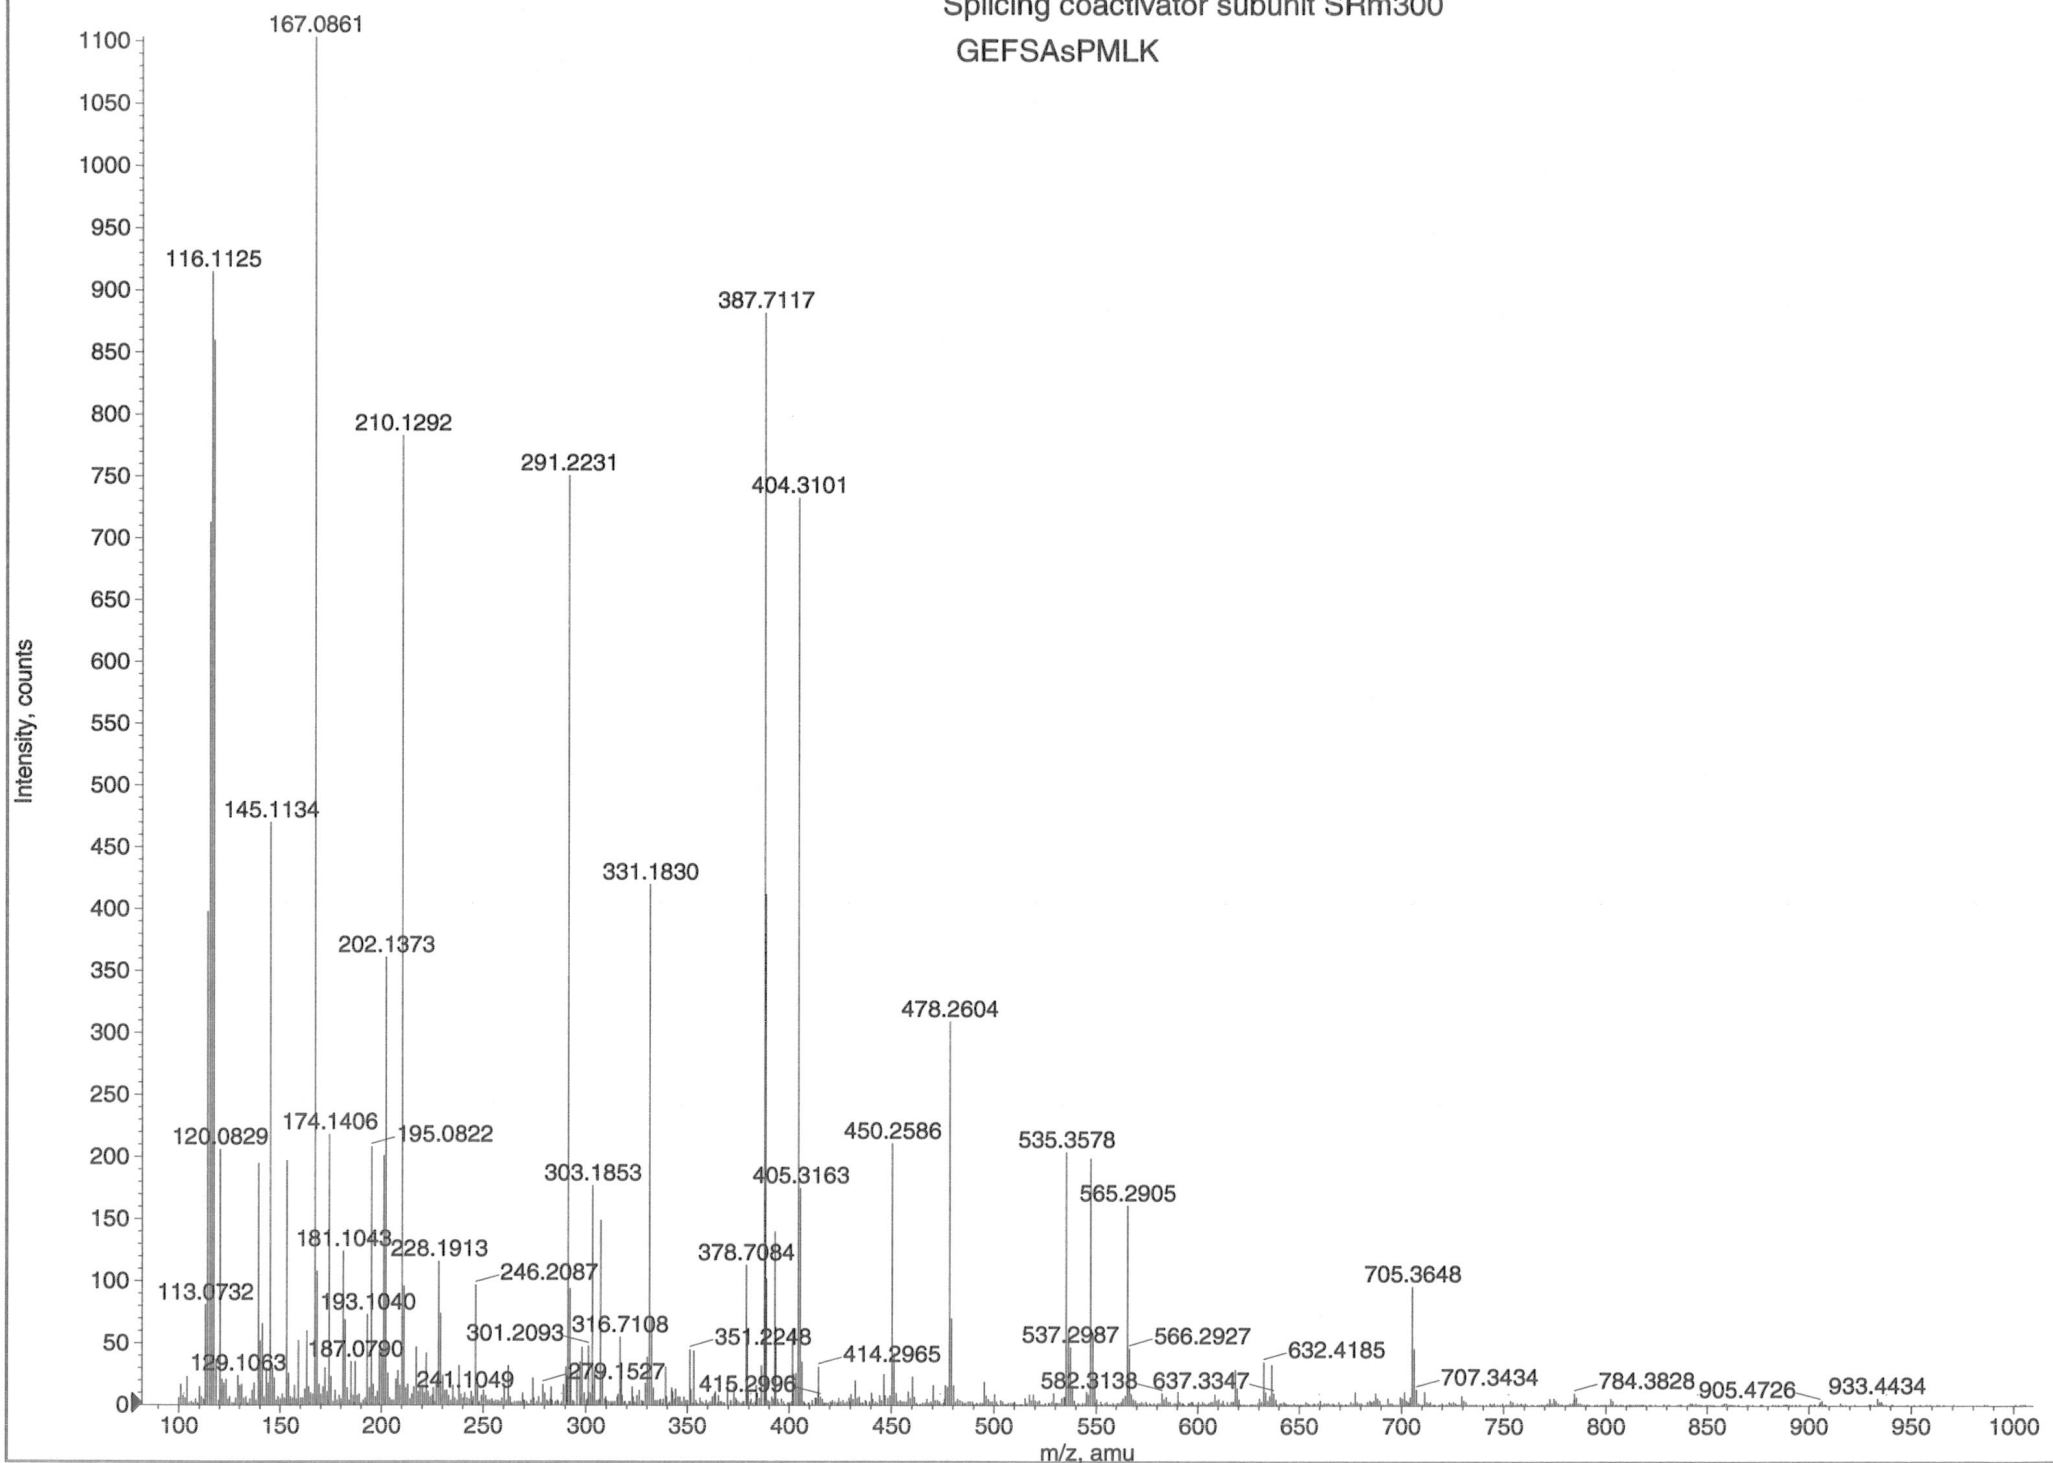



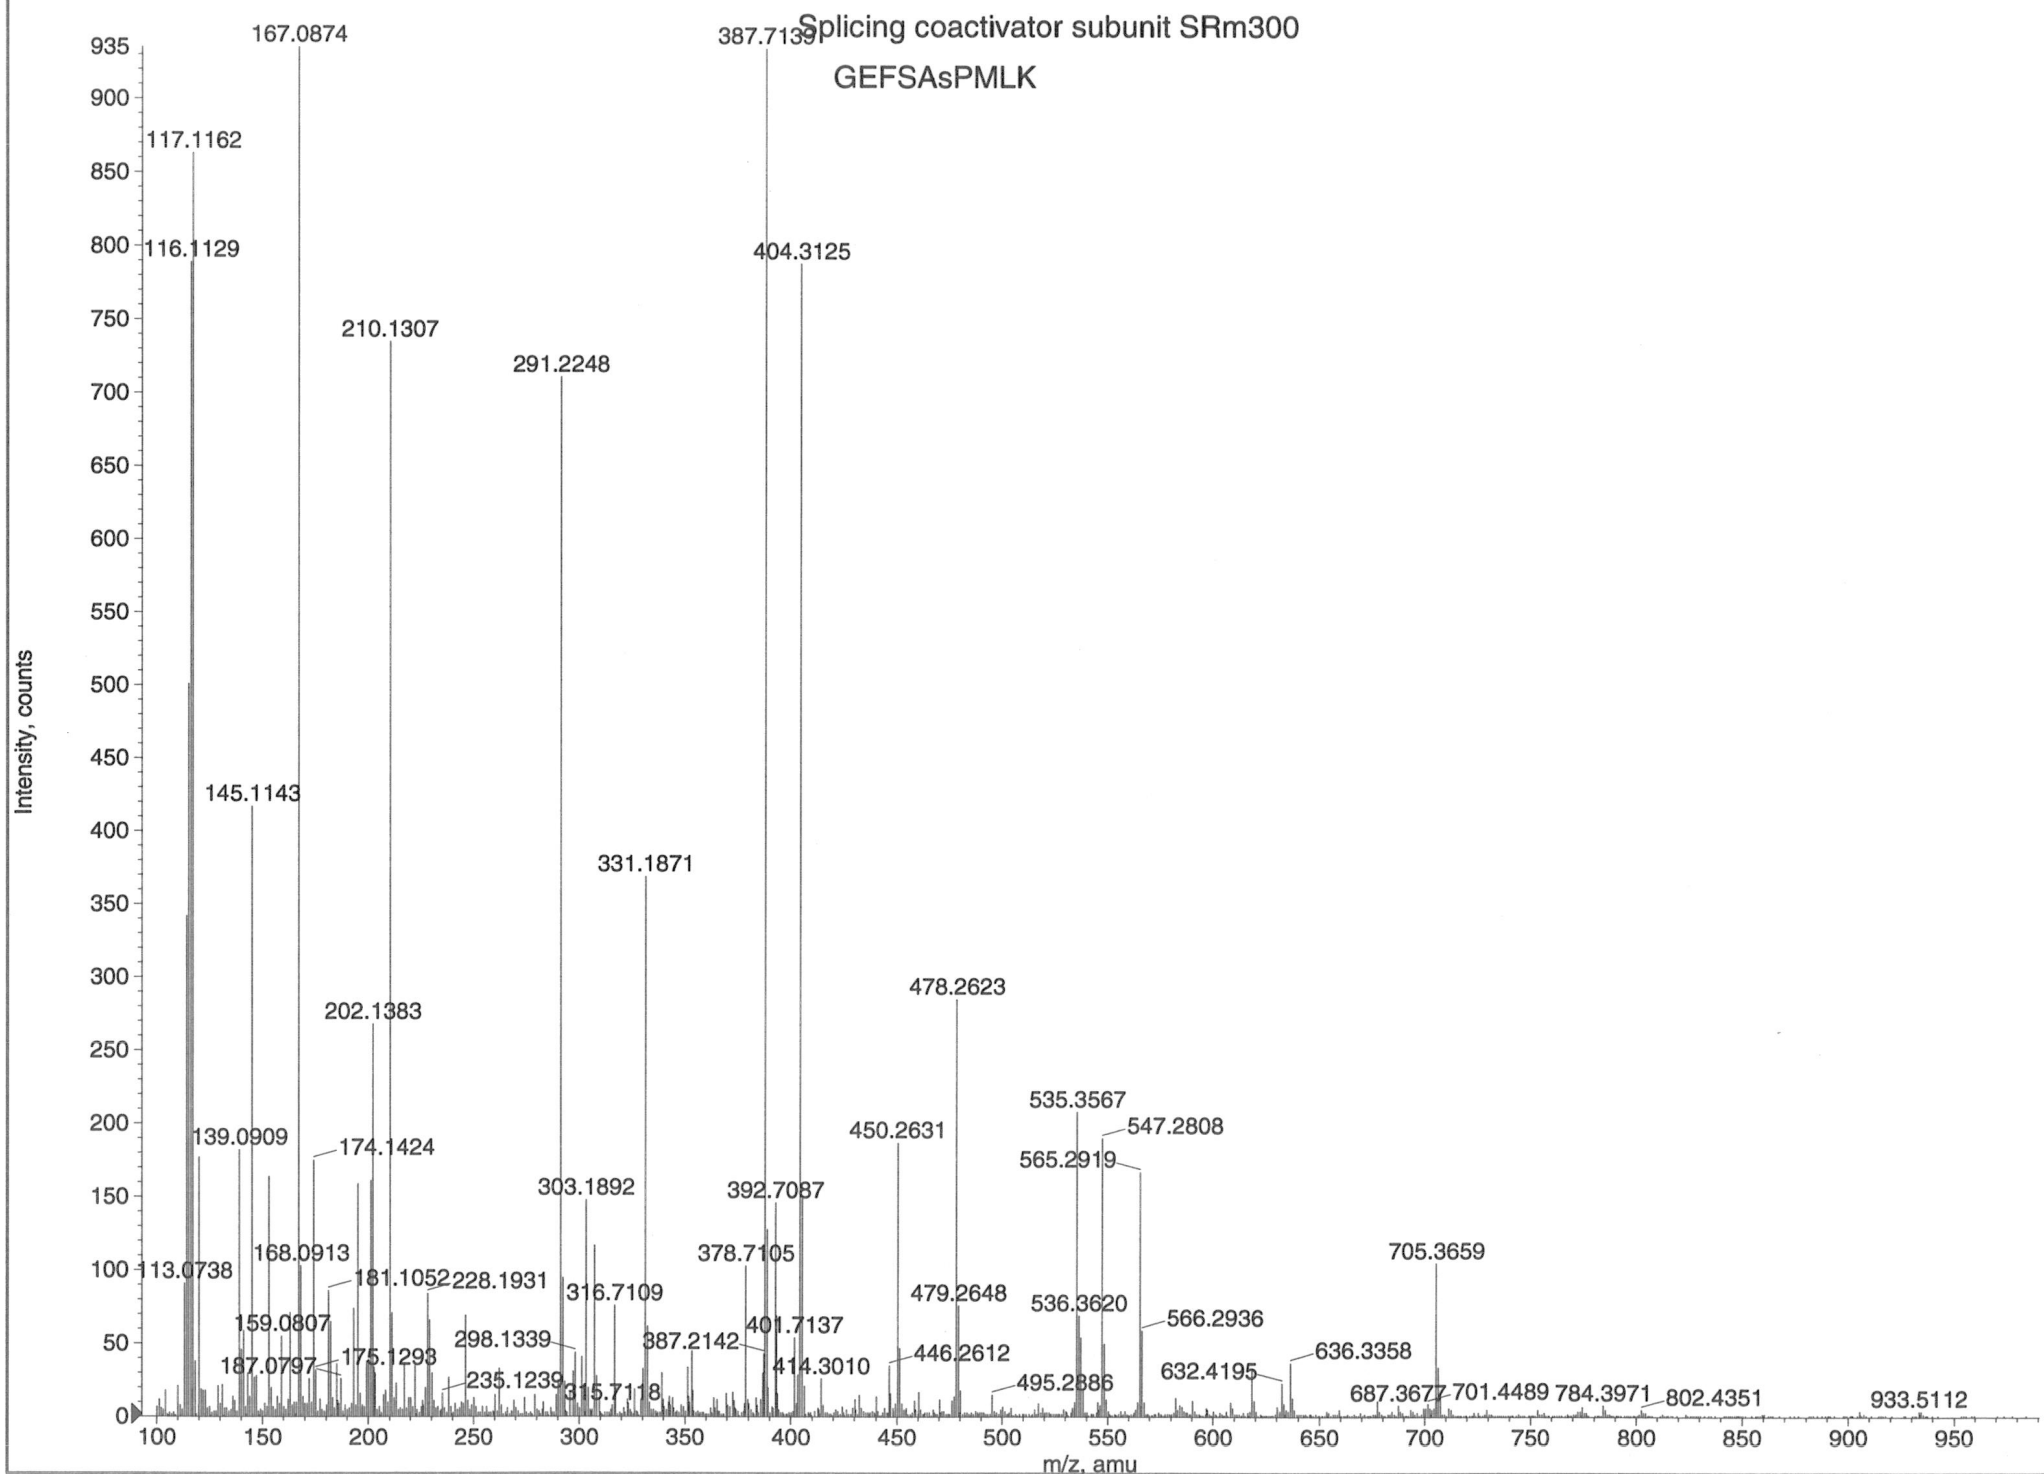

Splicing coactivator subunit SRm300

ELSNsPLRENSFGsPLEFR

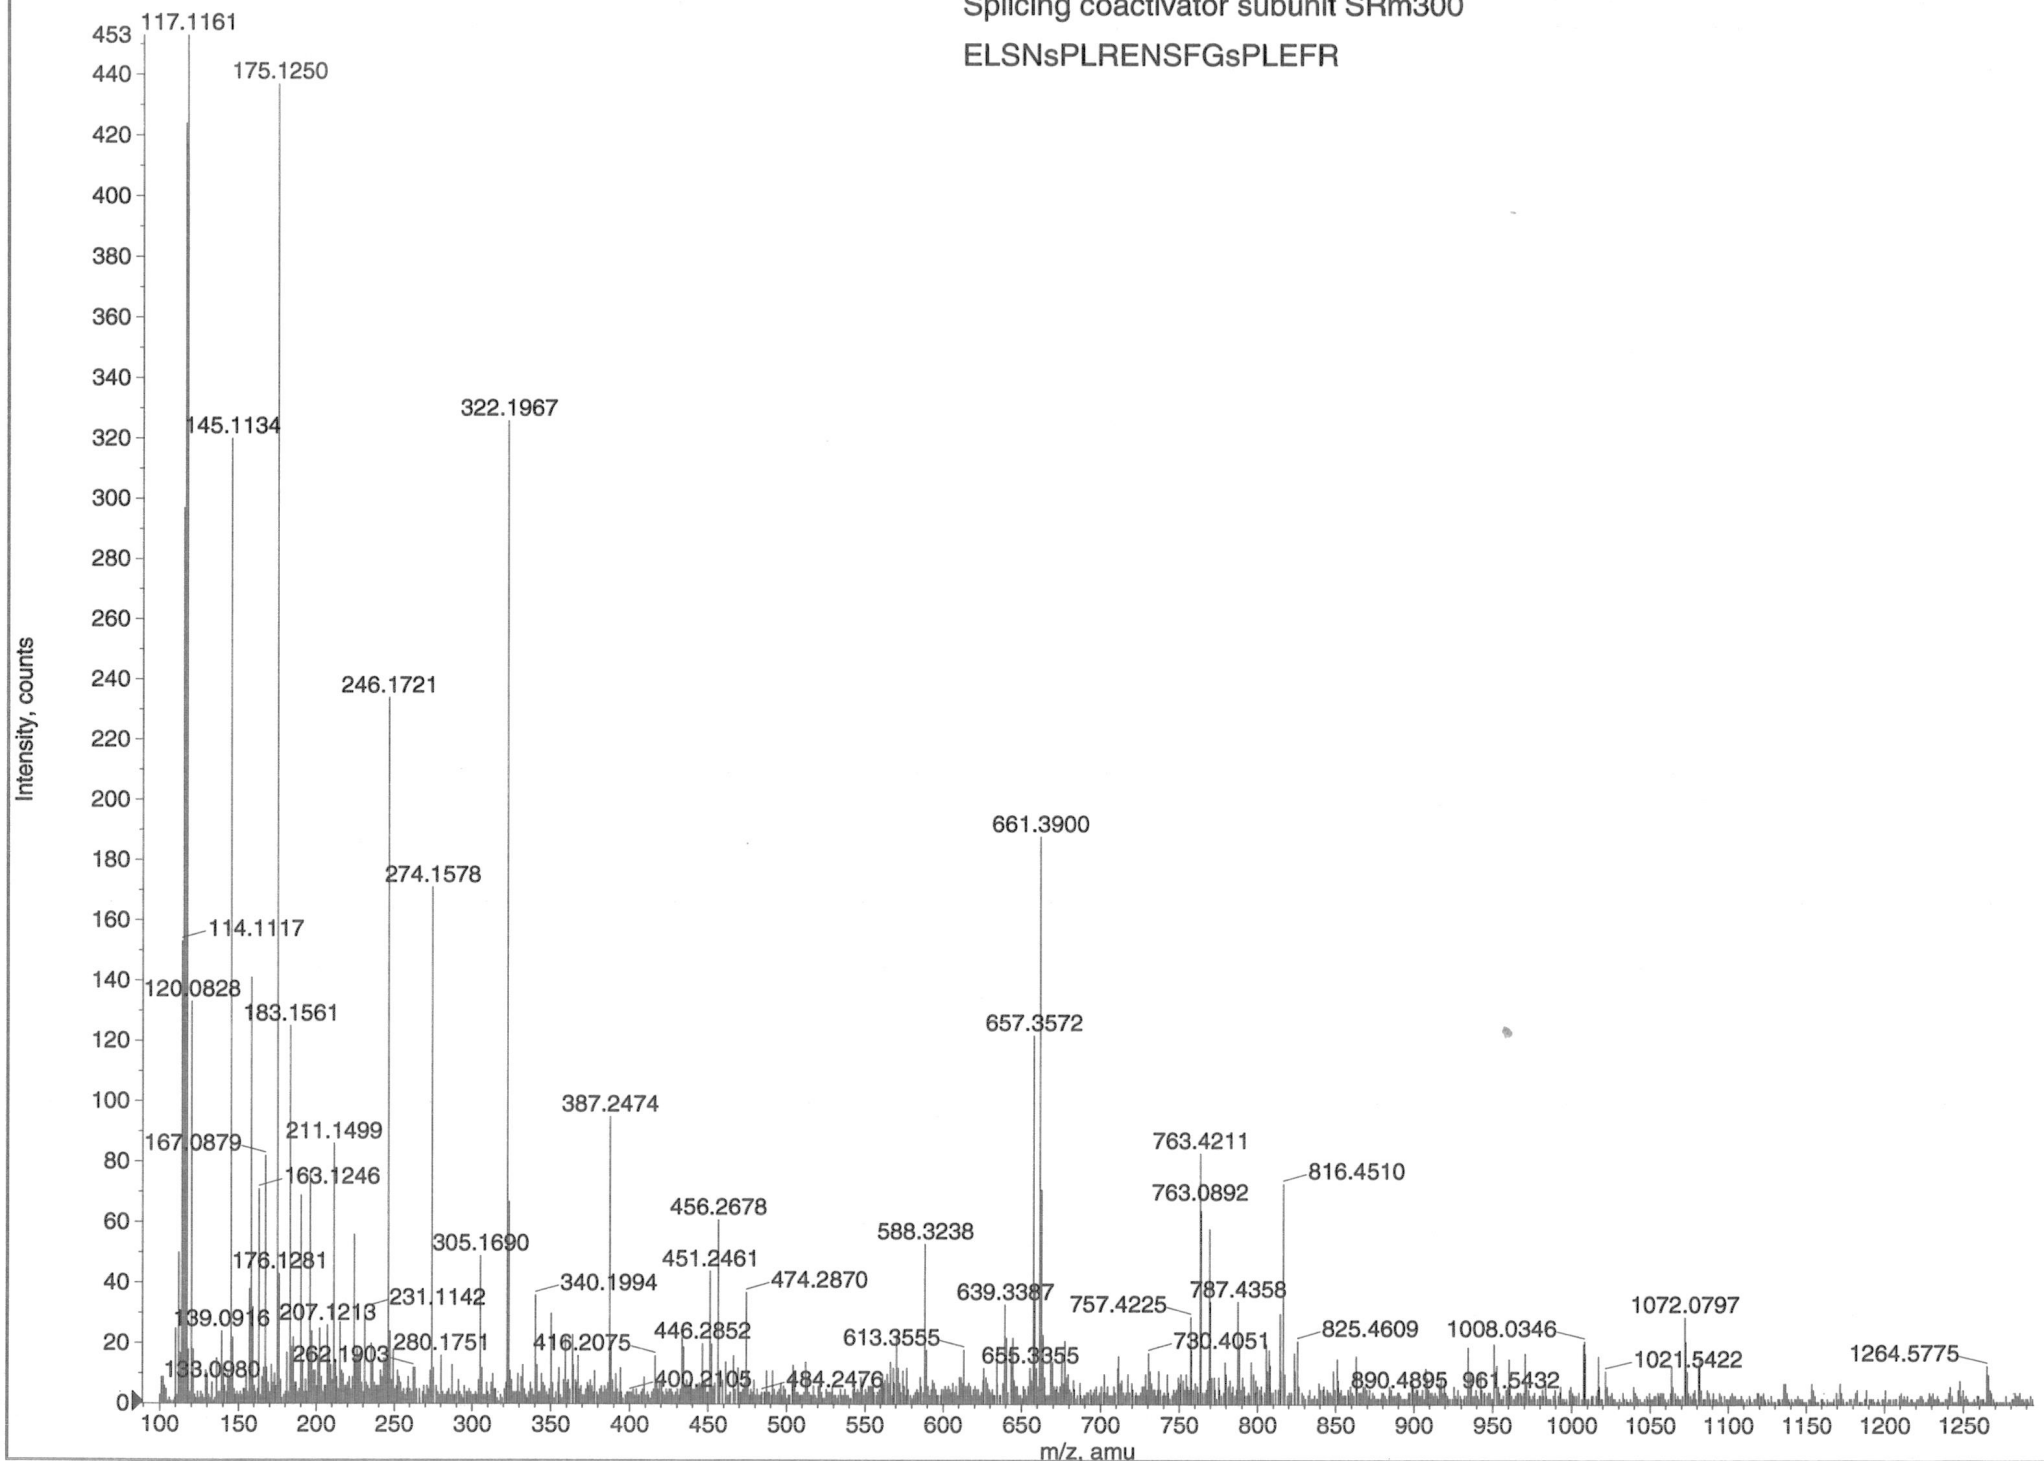

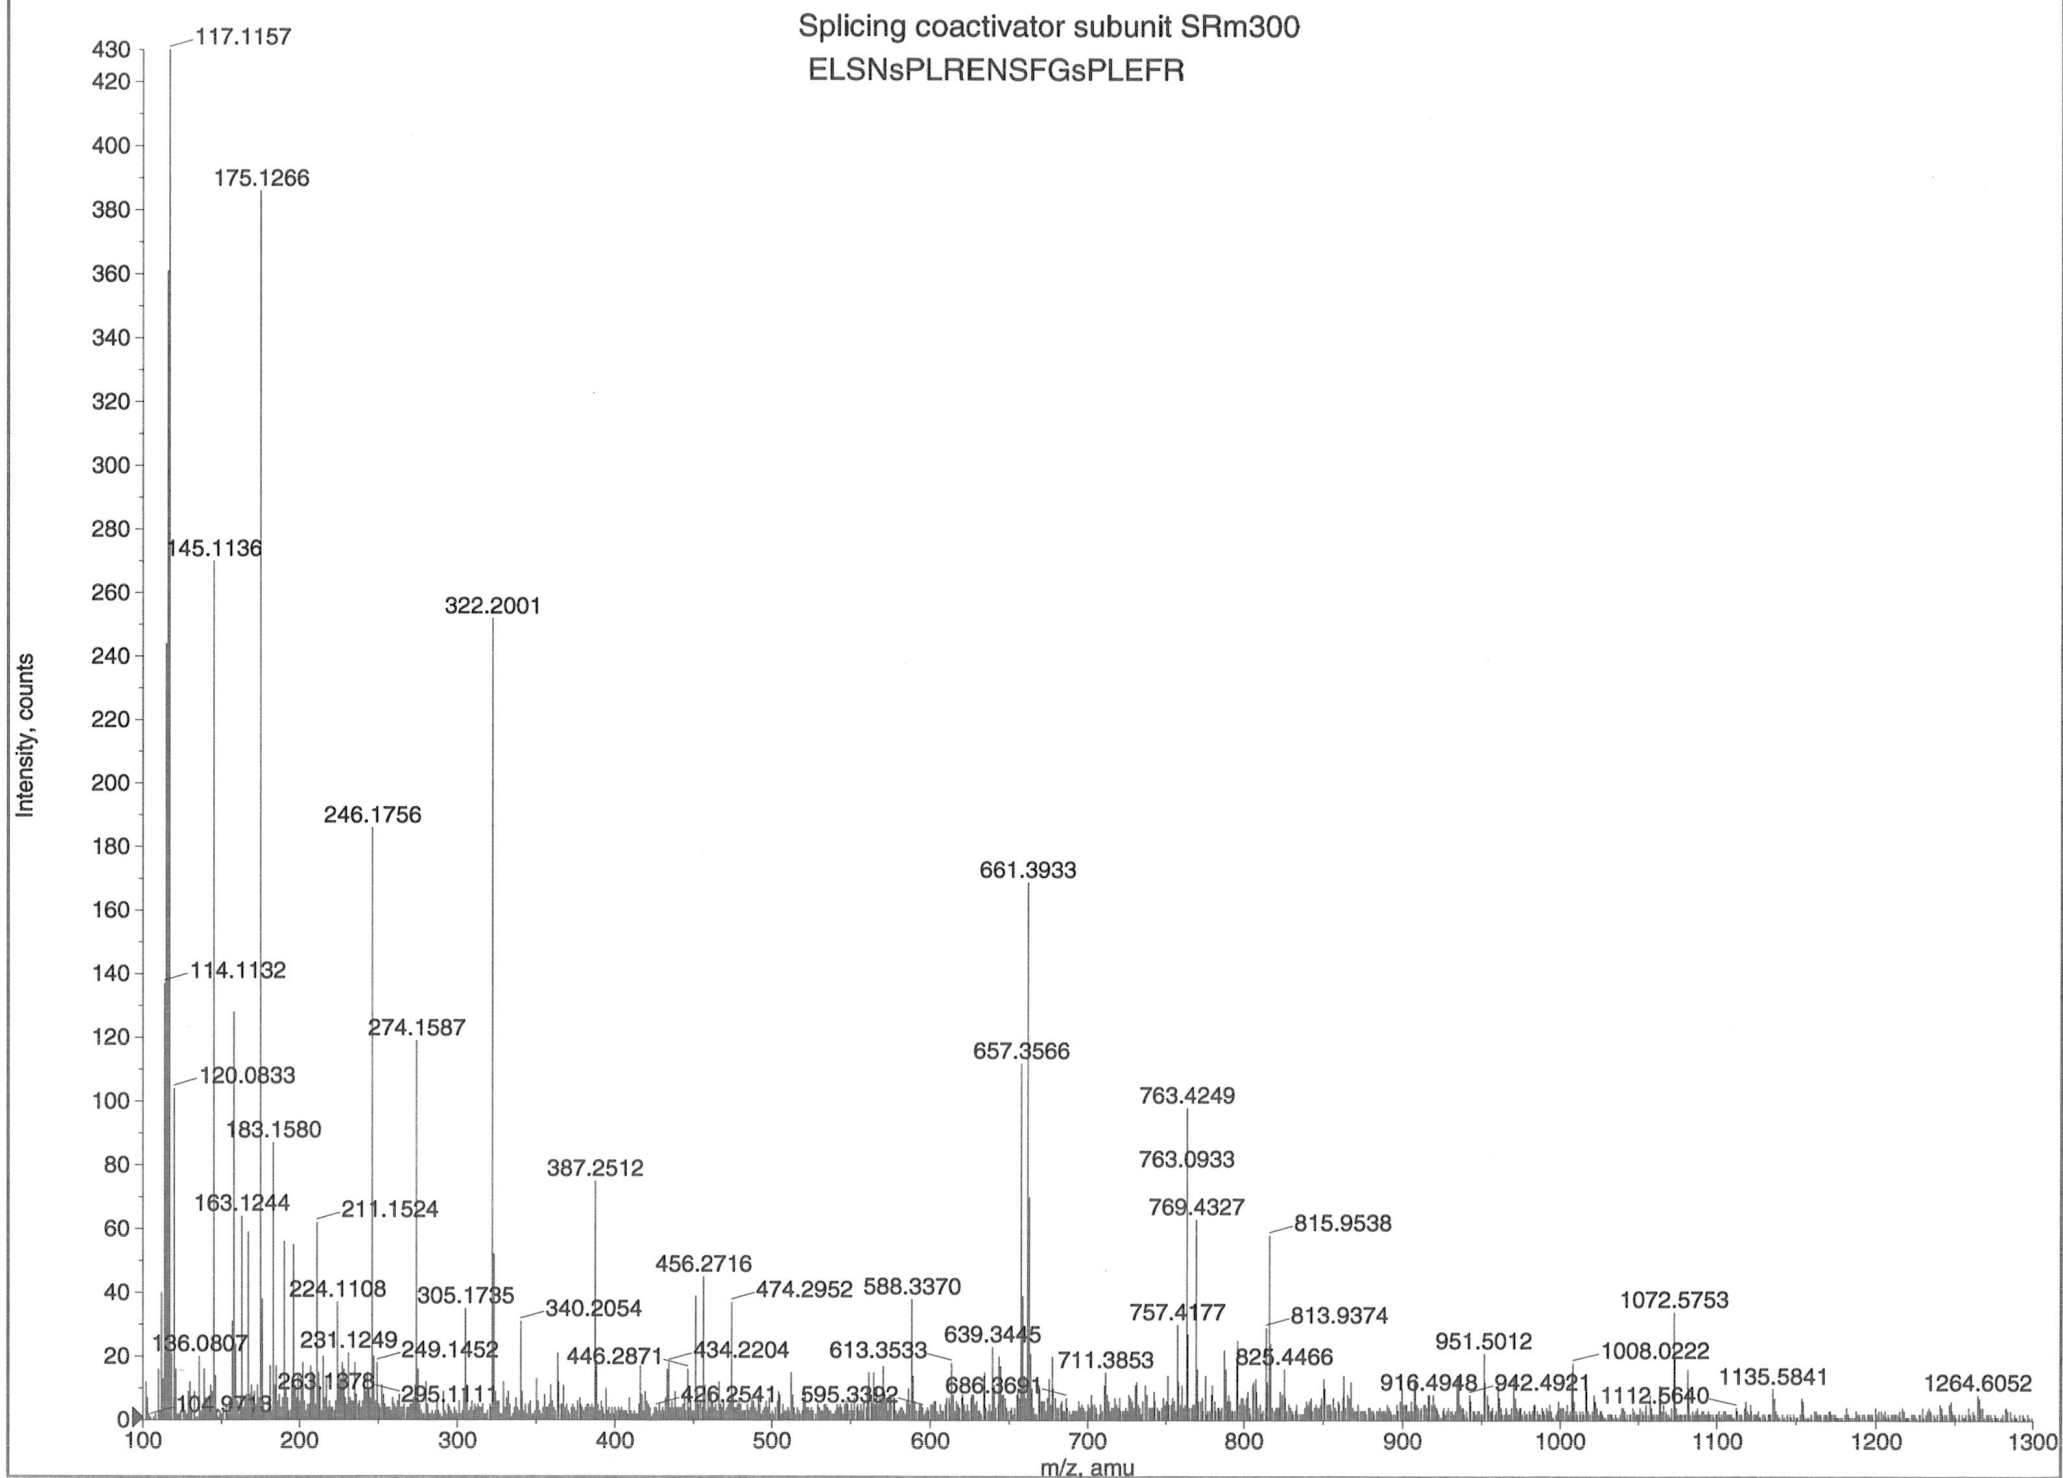

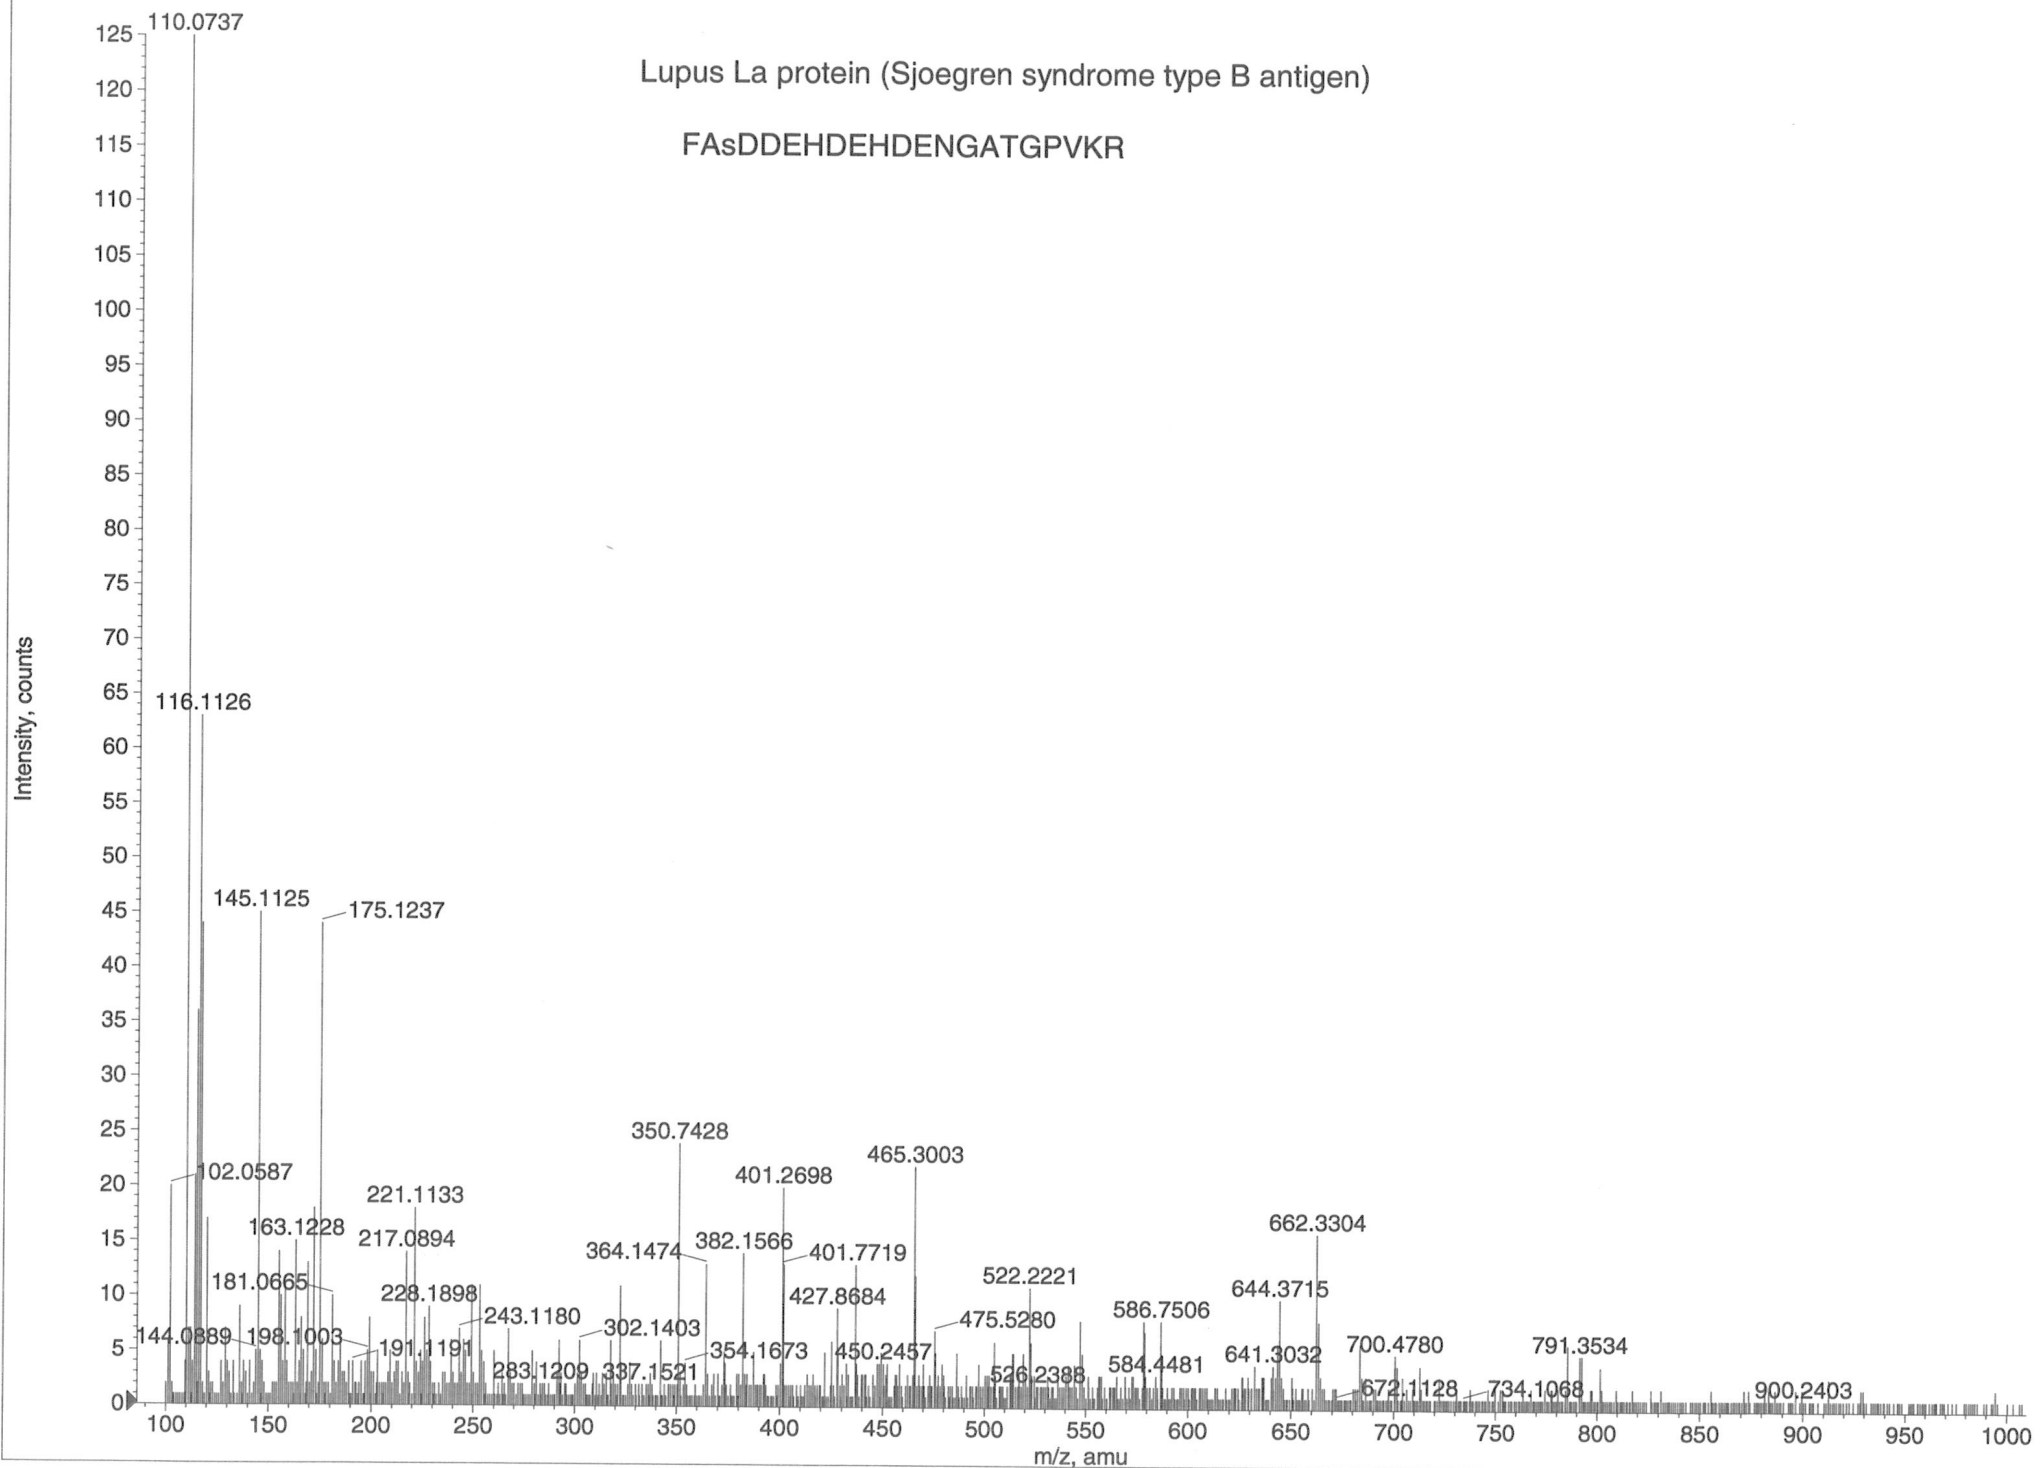

Surfeit 2  
DLGSTEDGDGtDDFLtDKEDEKAKPPR

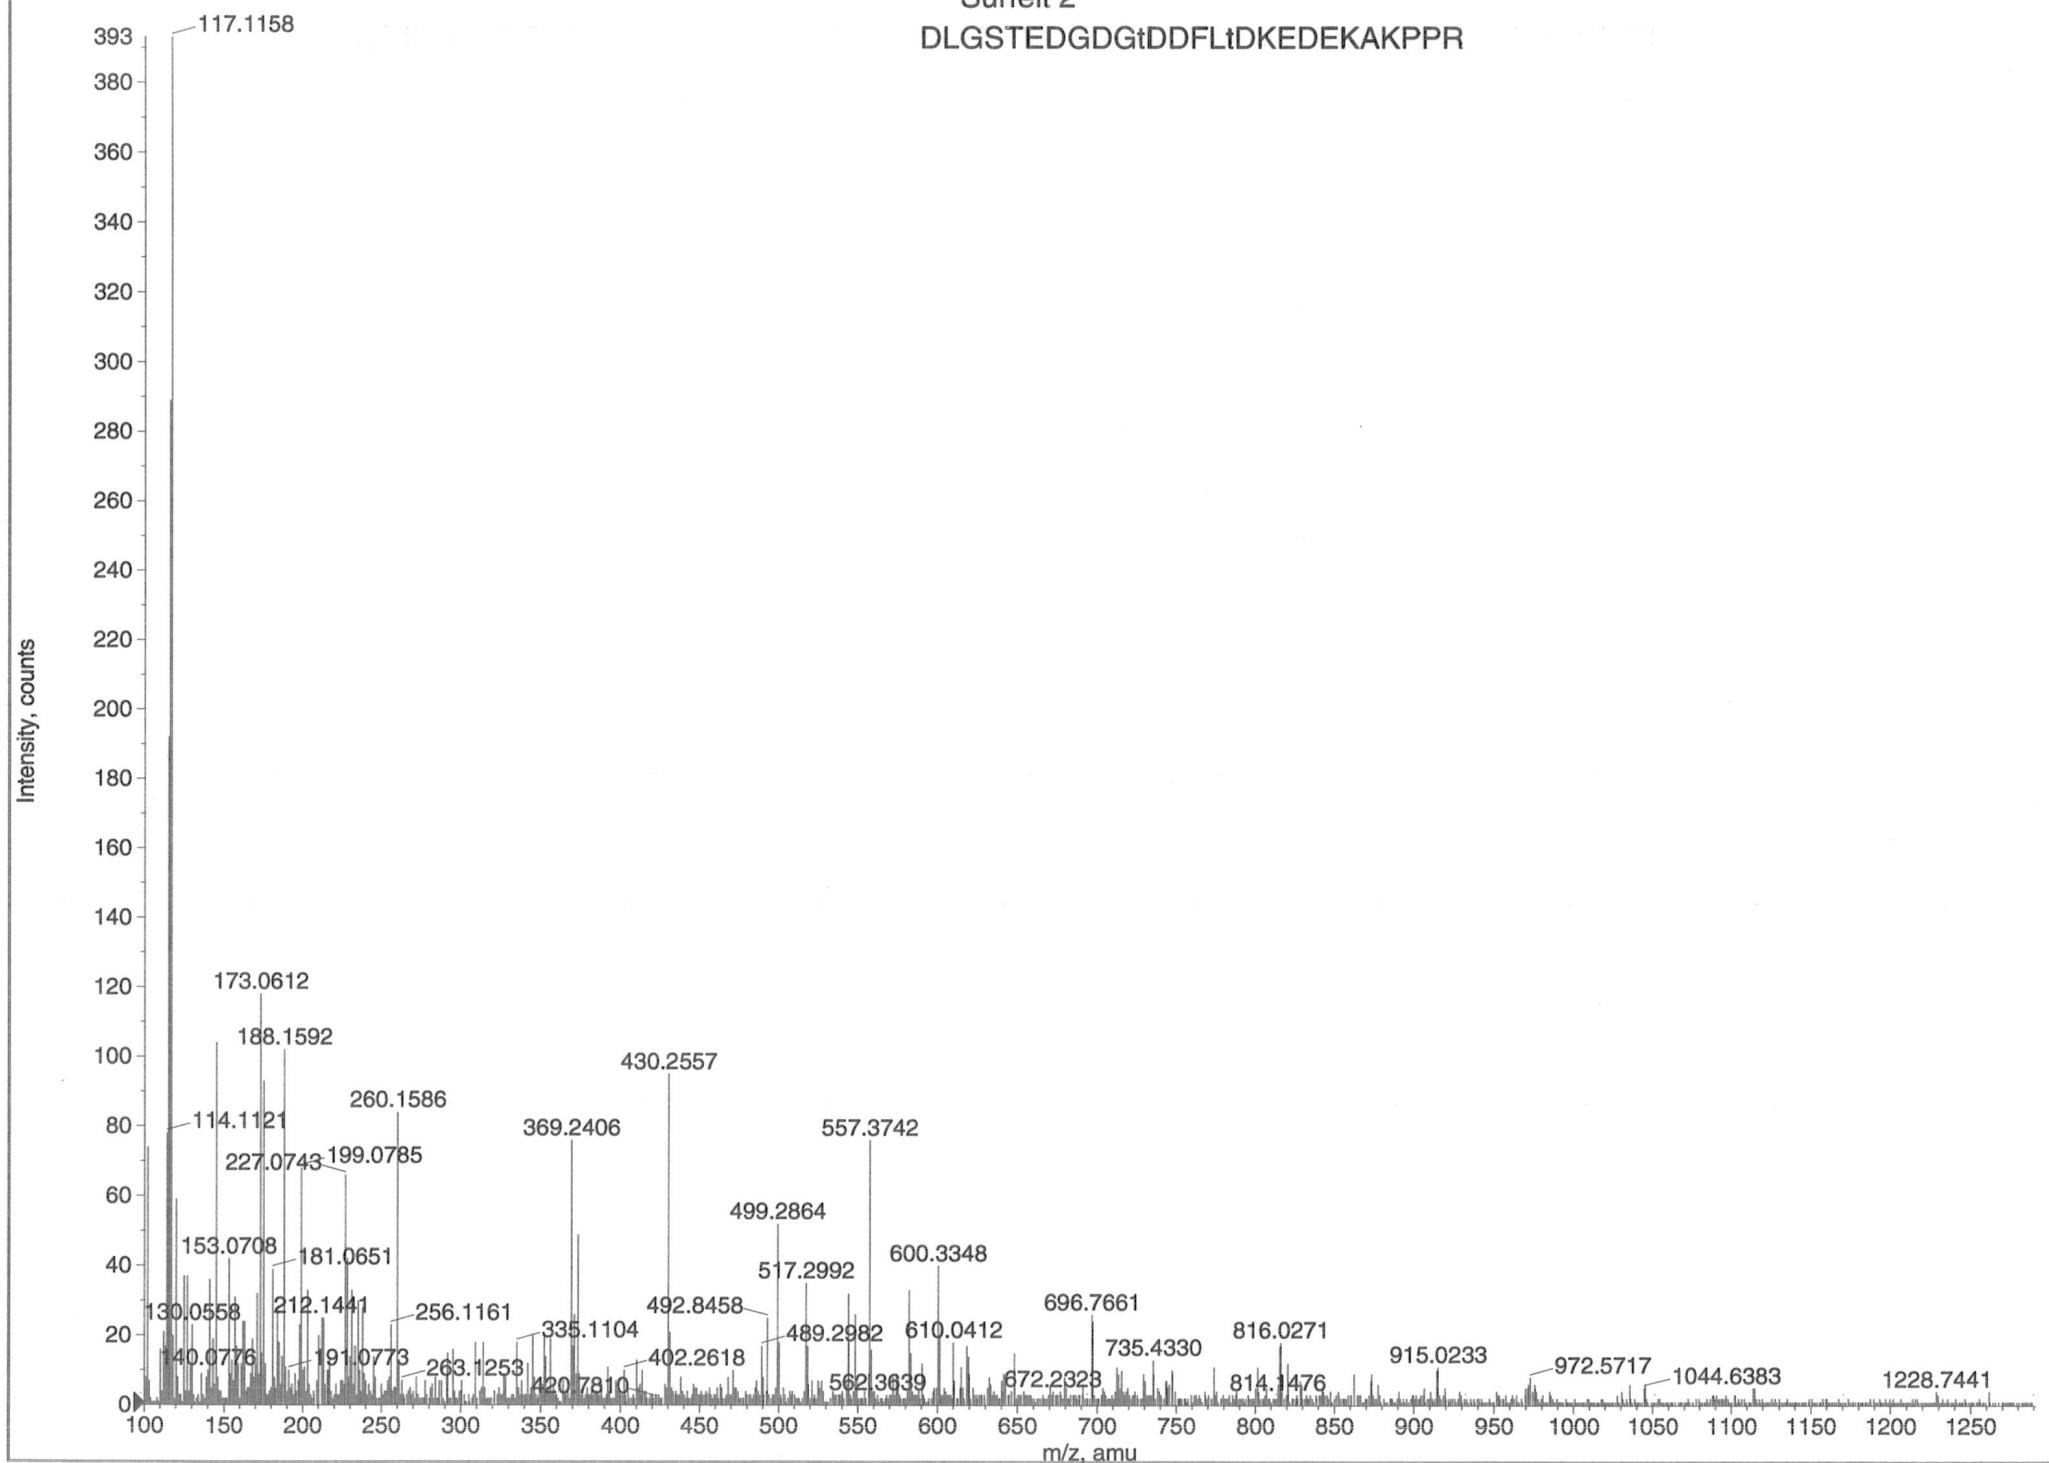

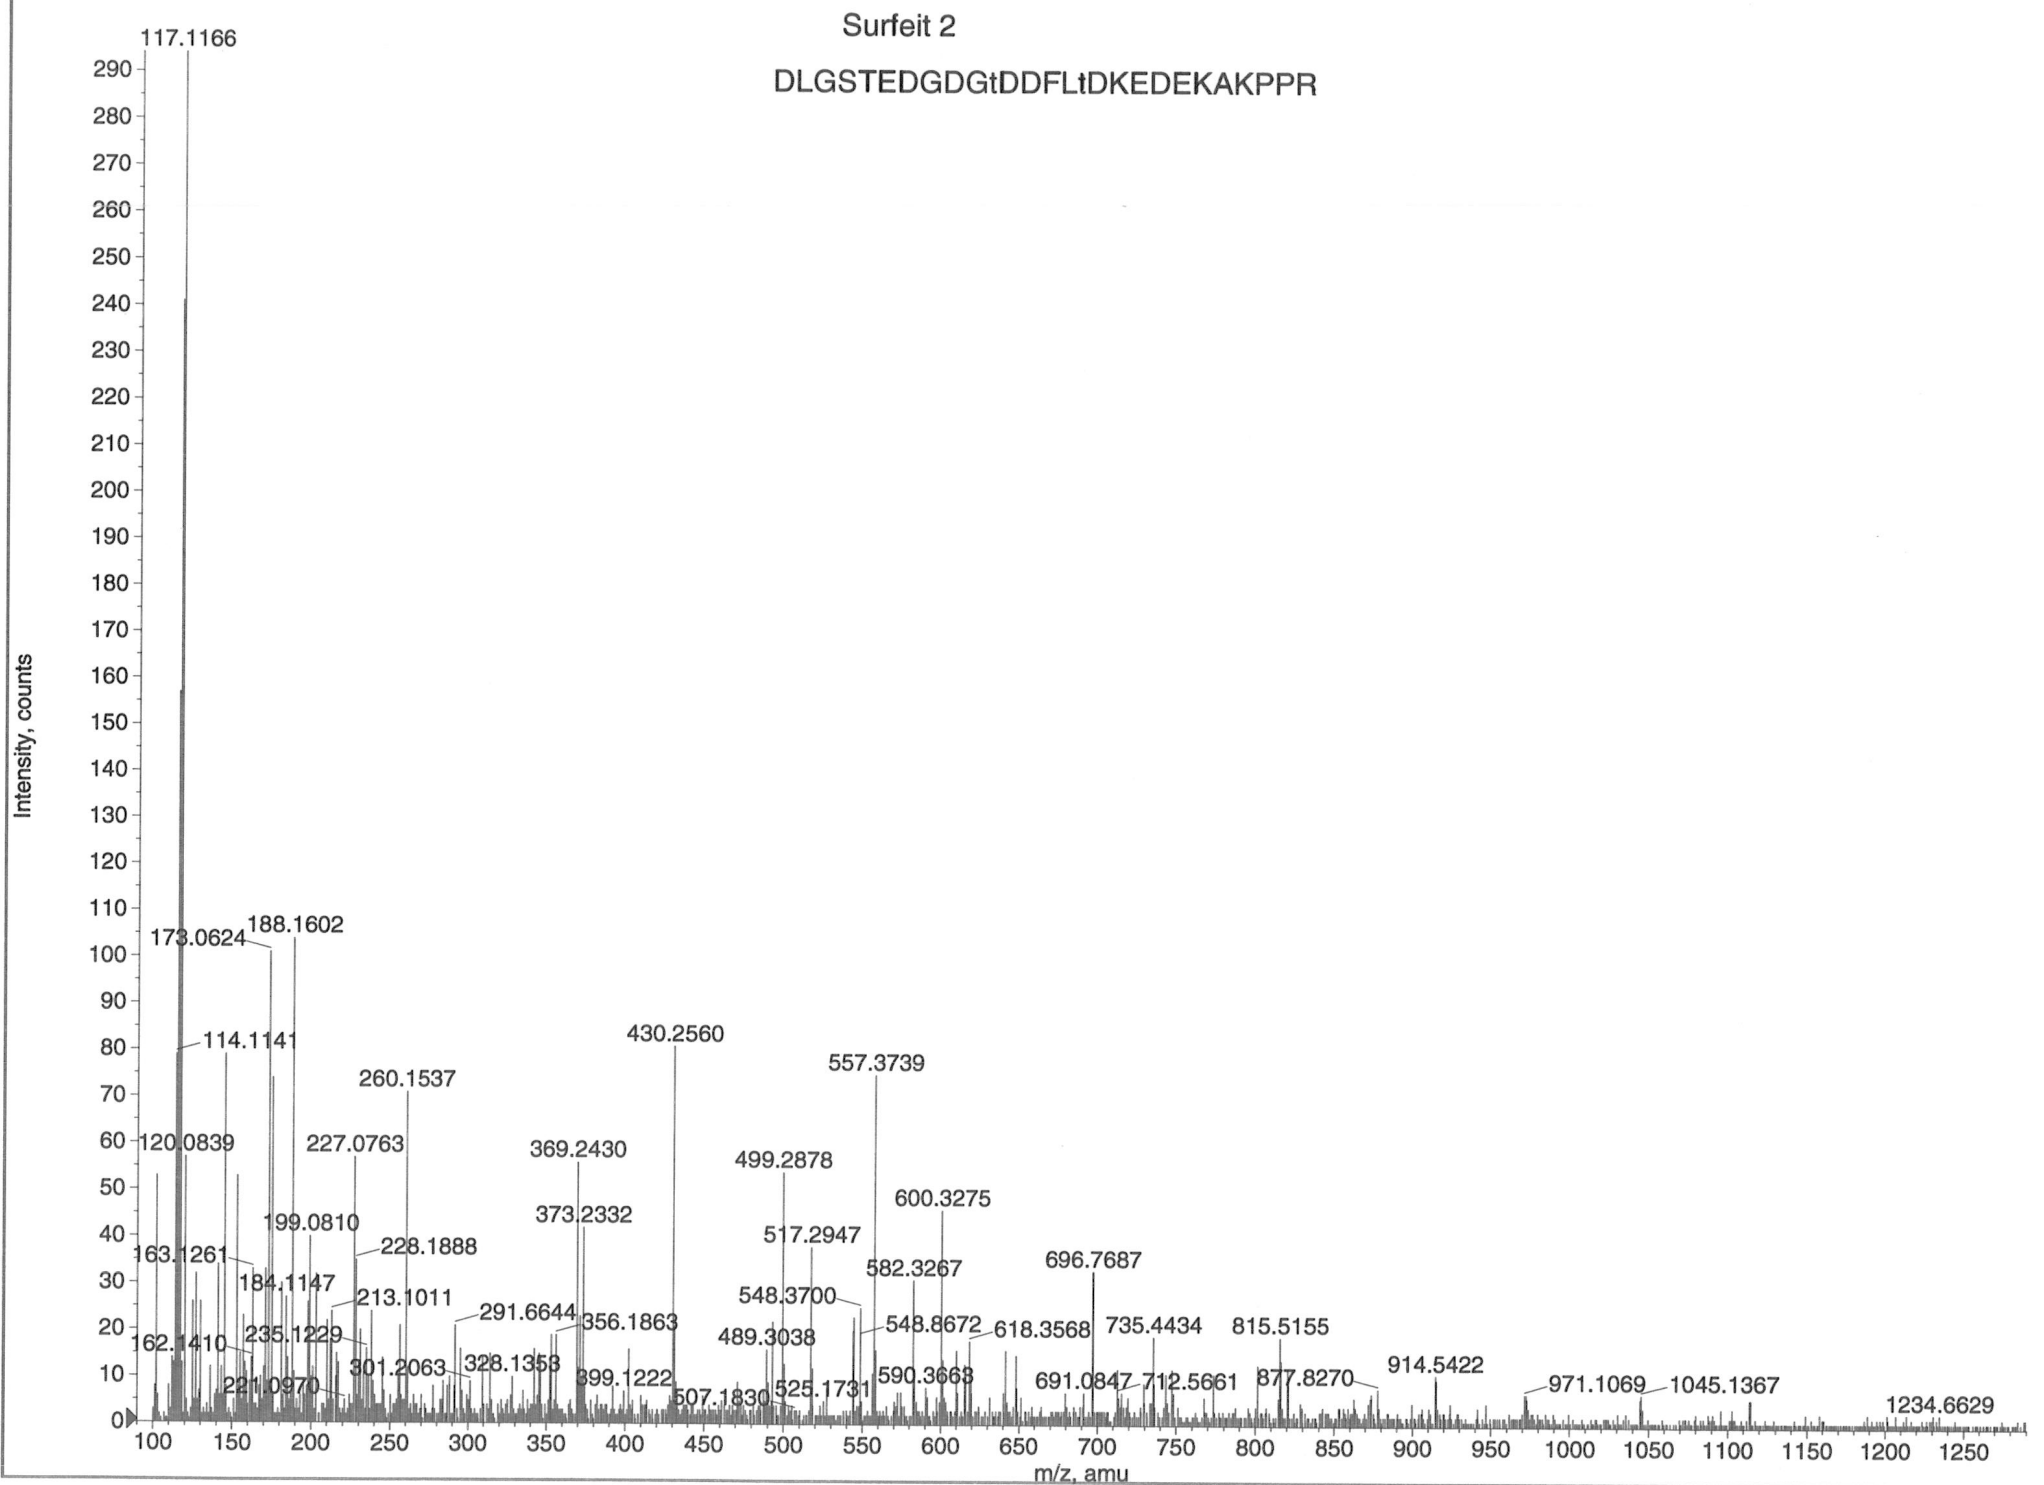

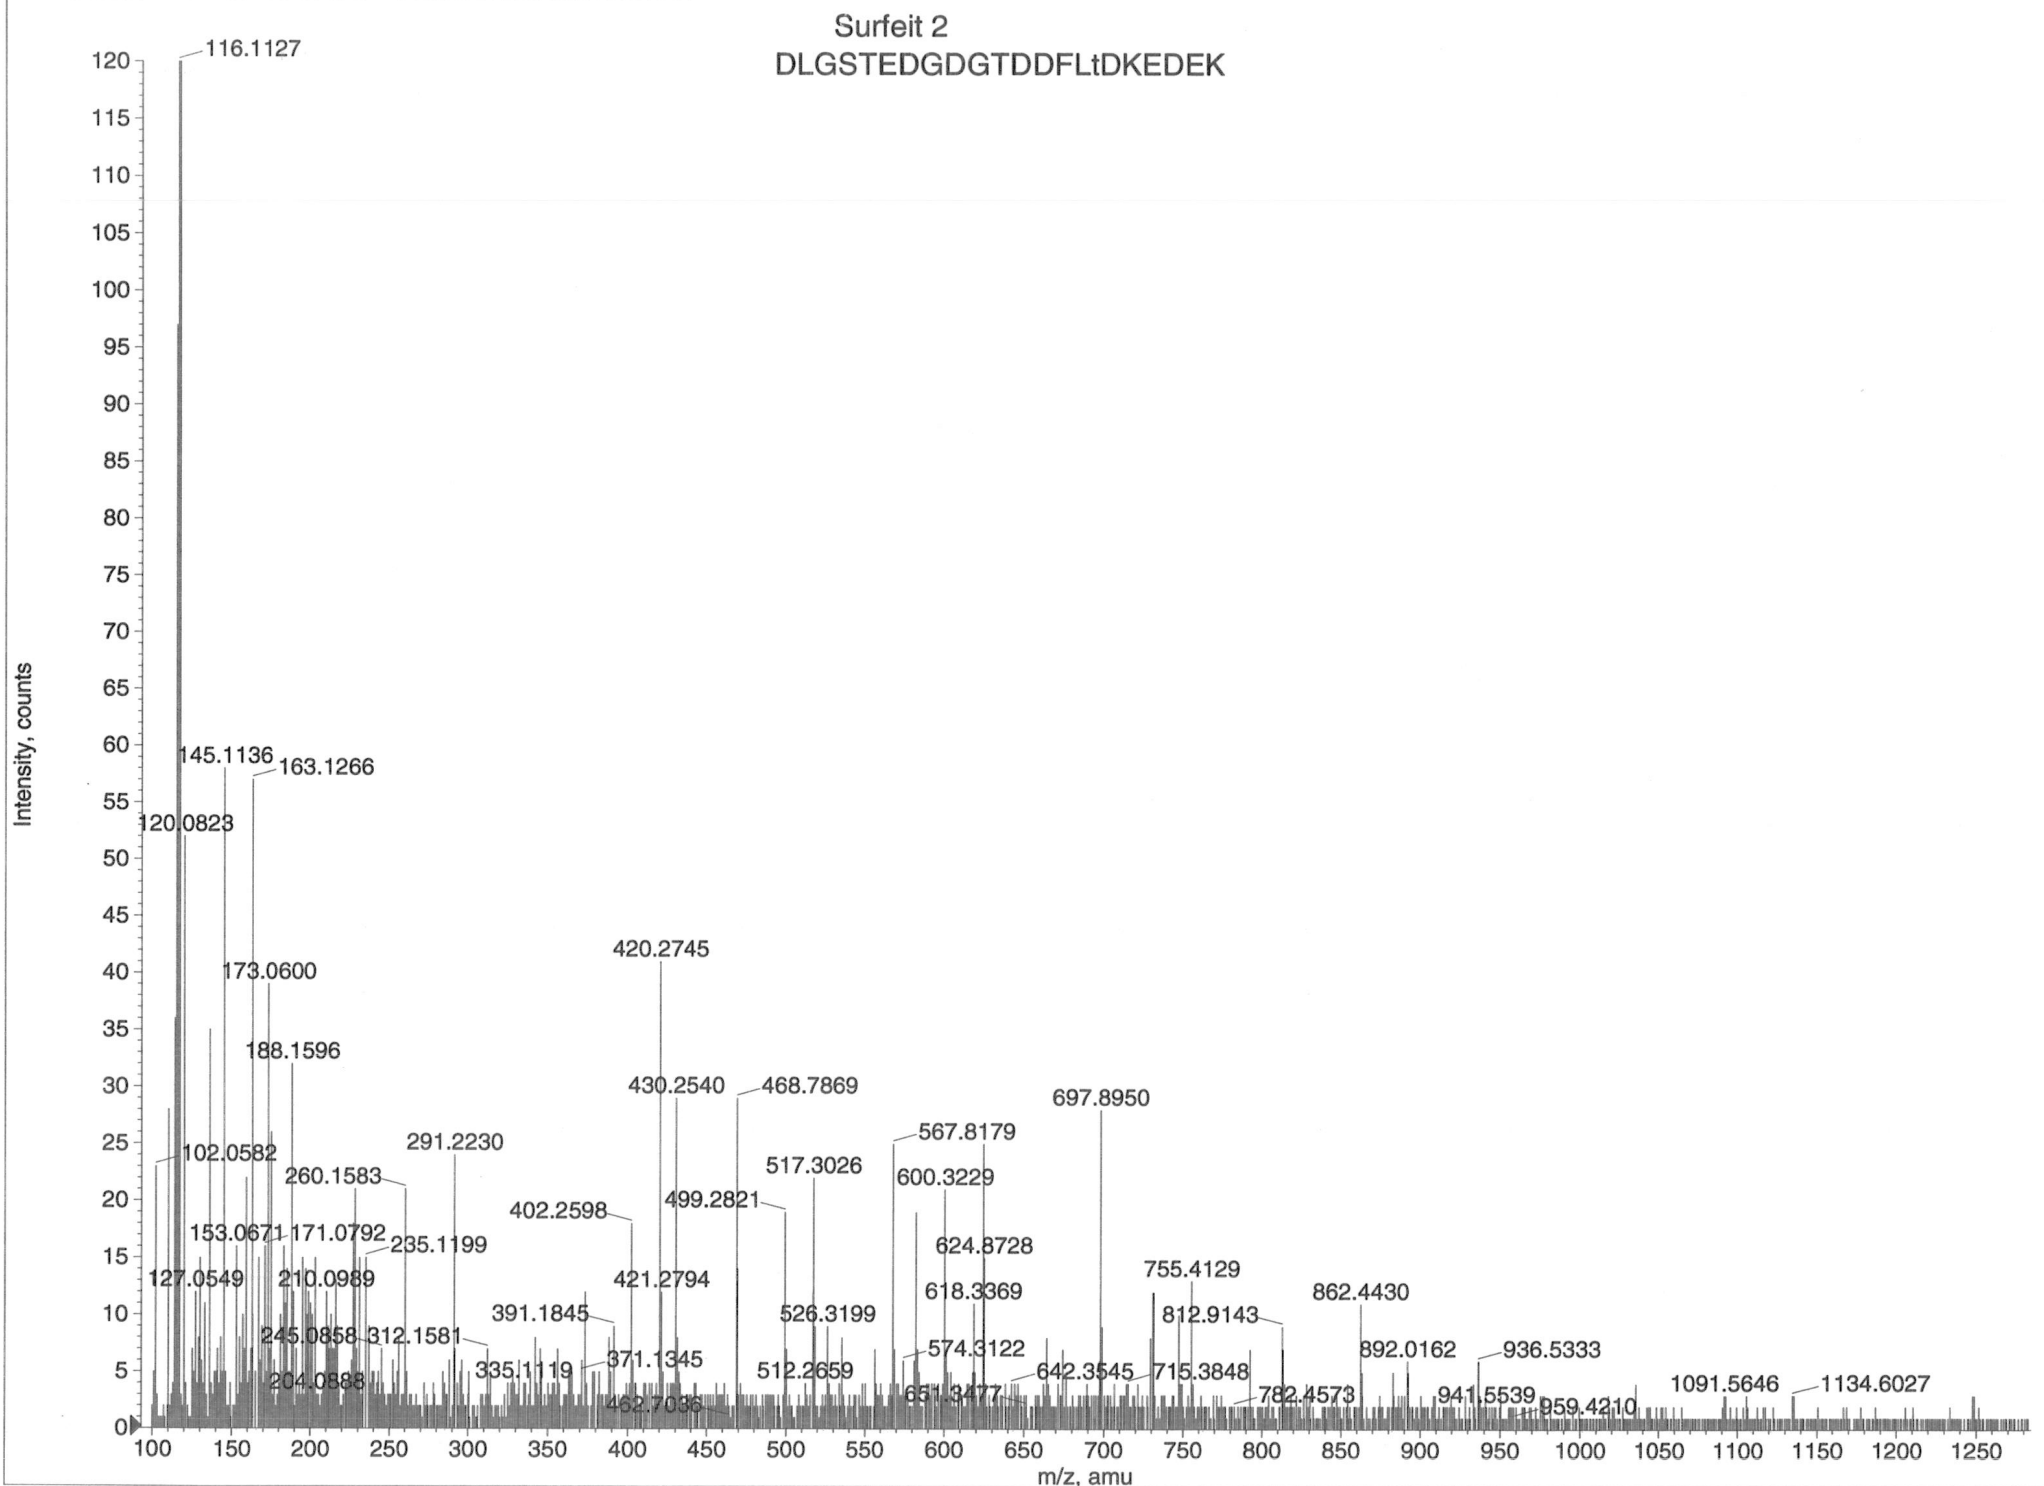

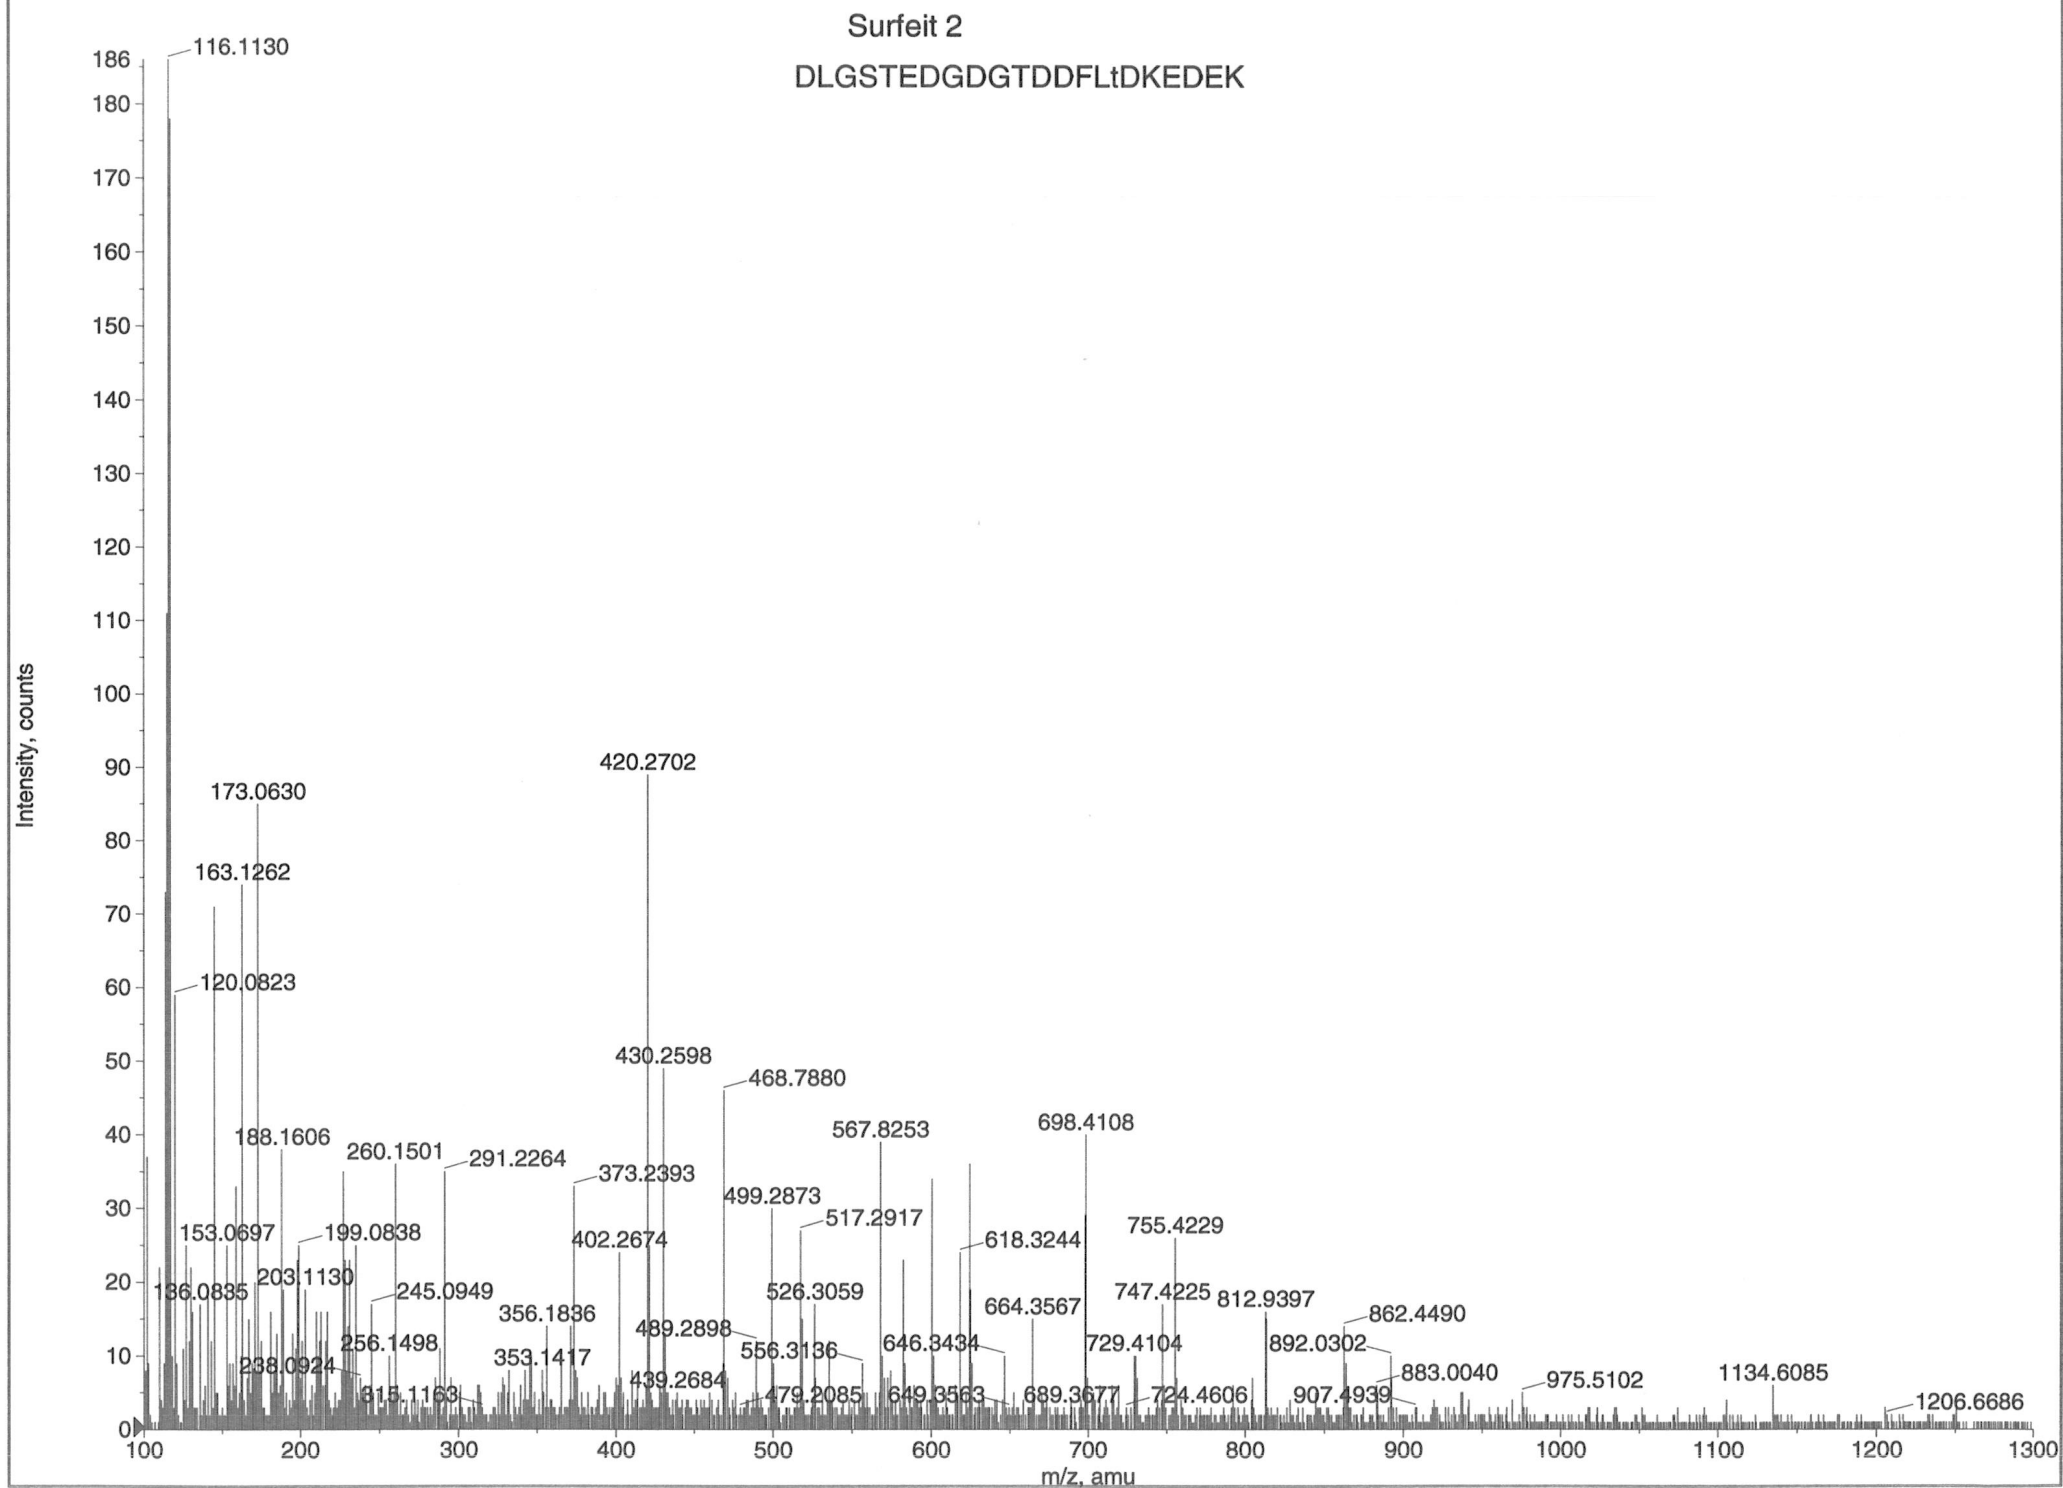



Thyroid hormone receptor associated protein 3  
NREEWDPEYtPK

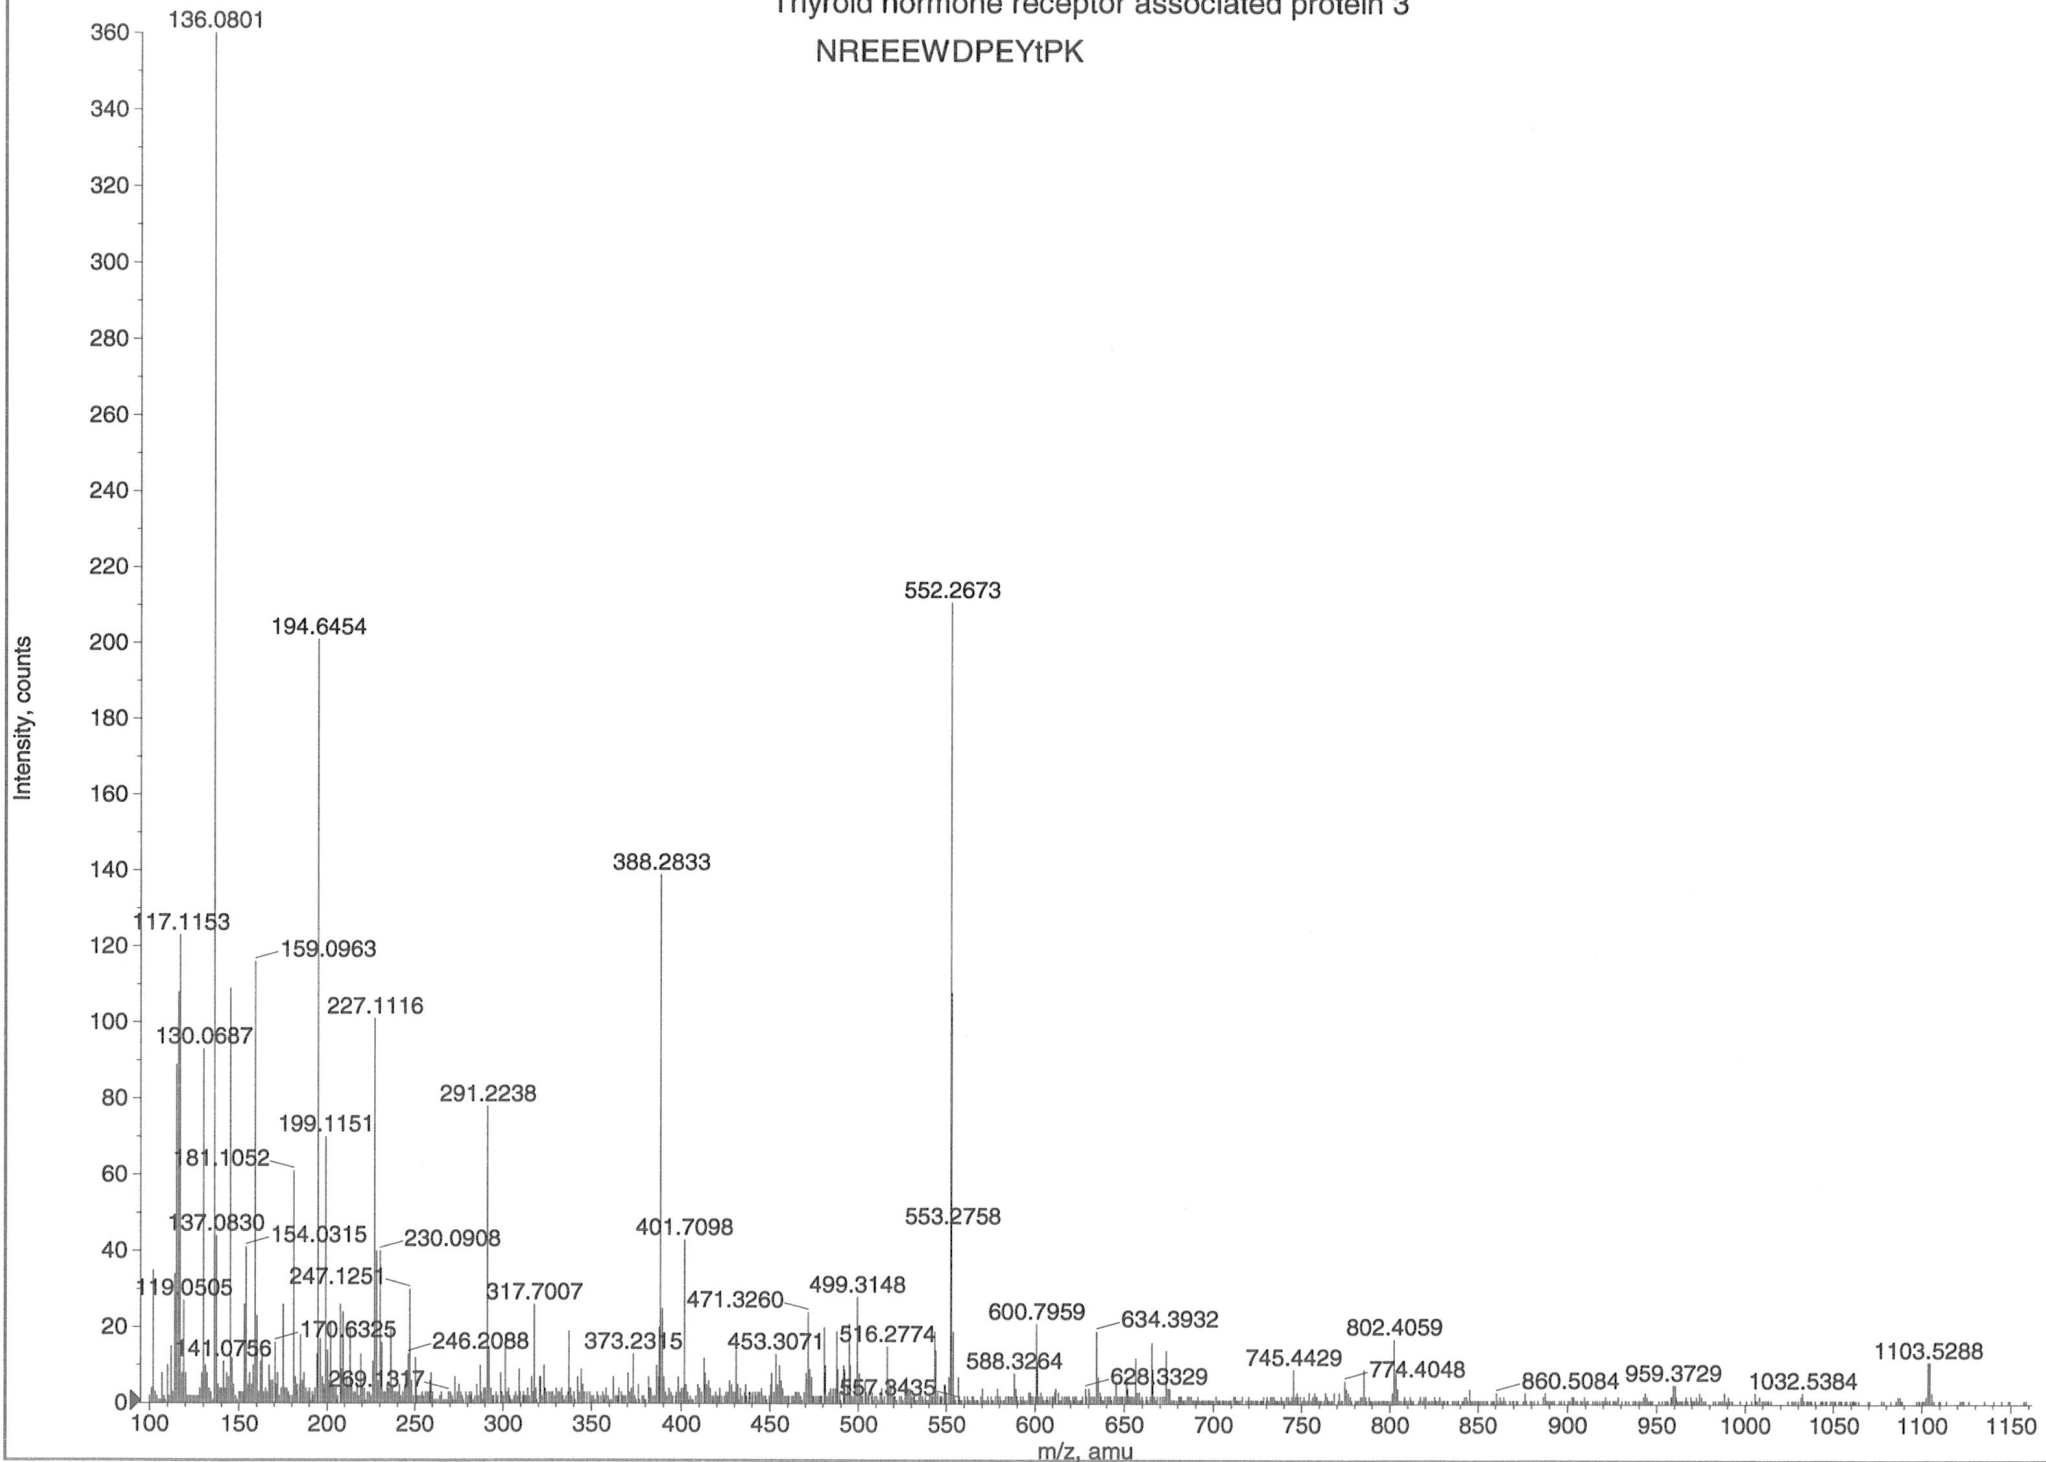

Thyroid hormone receptor associated protein 3  
NREEWDPEYtPK

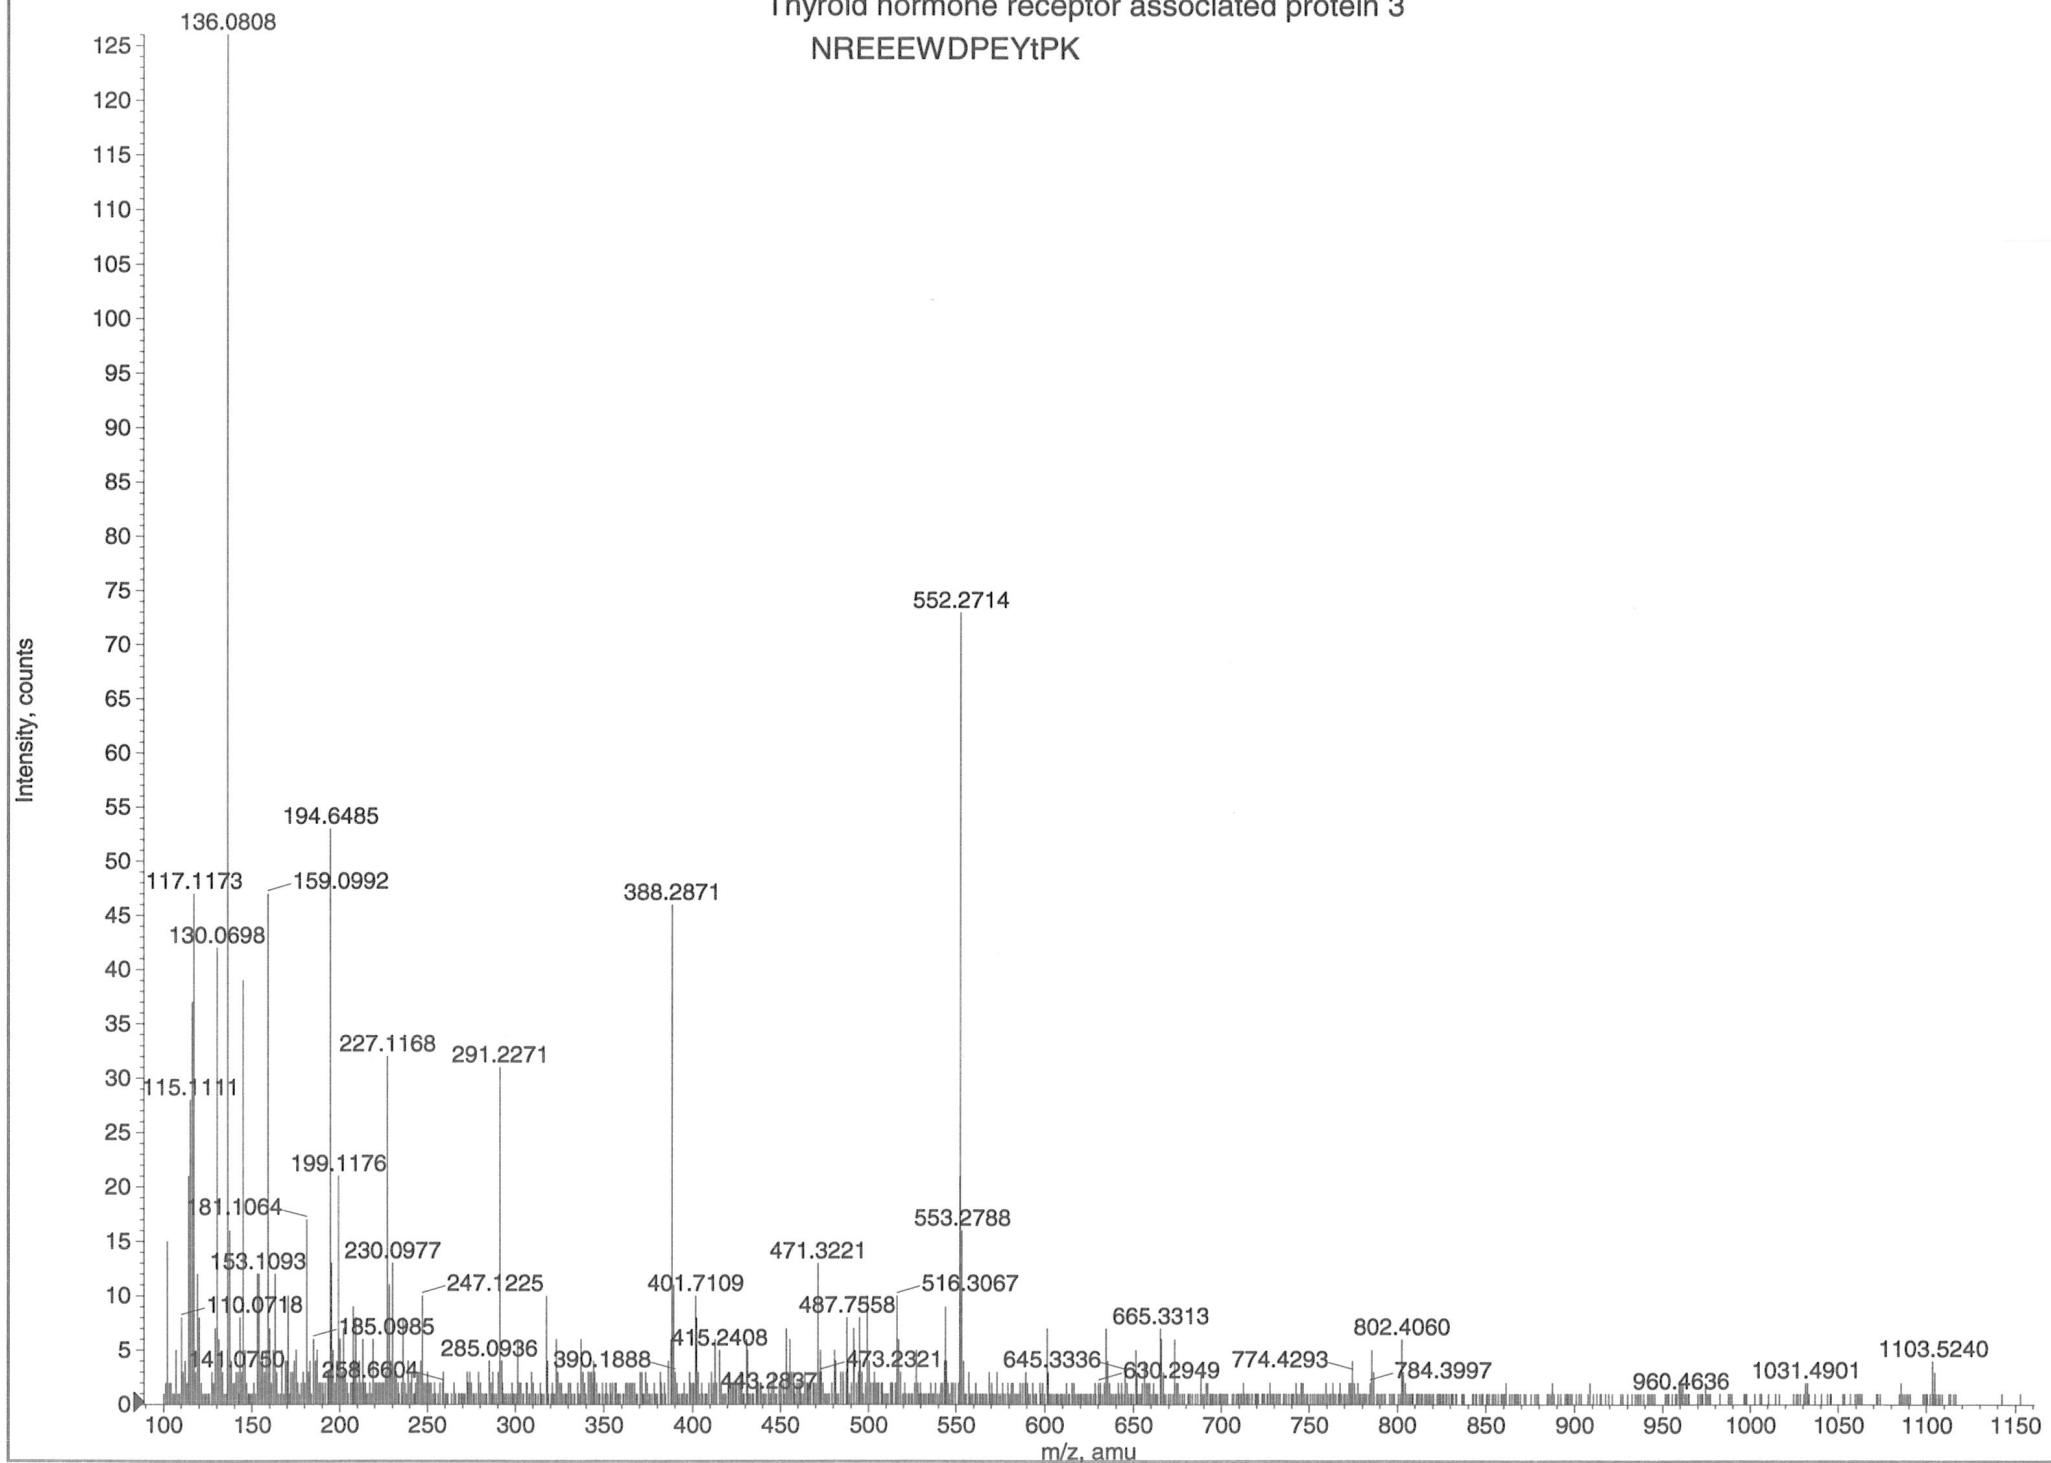

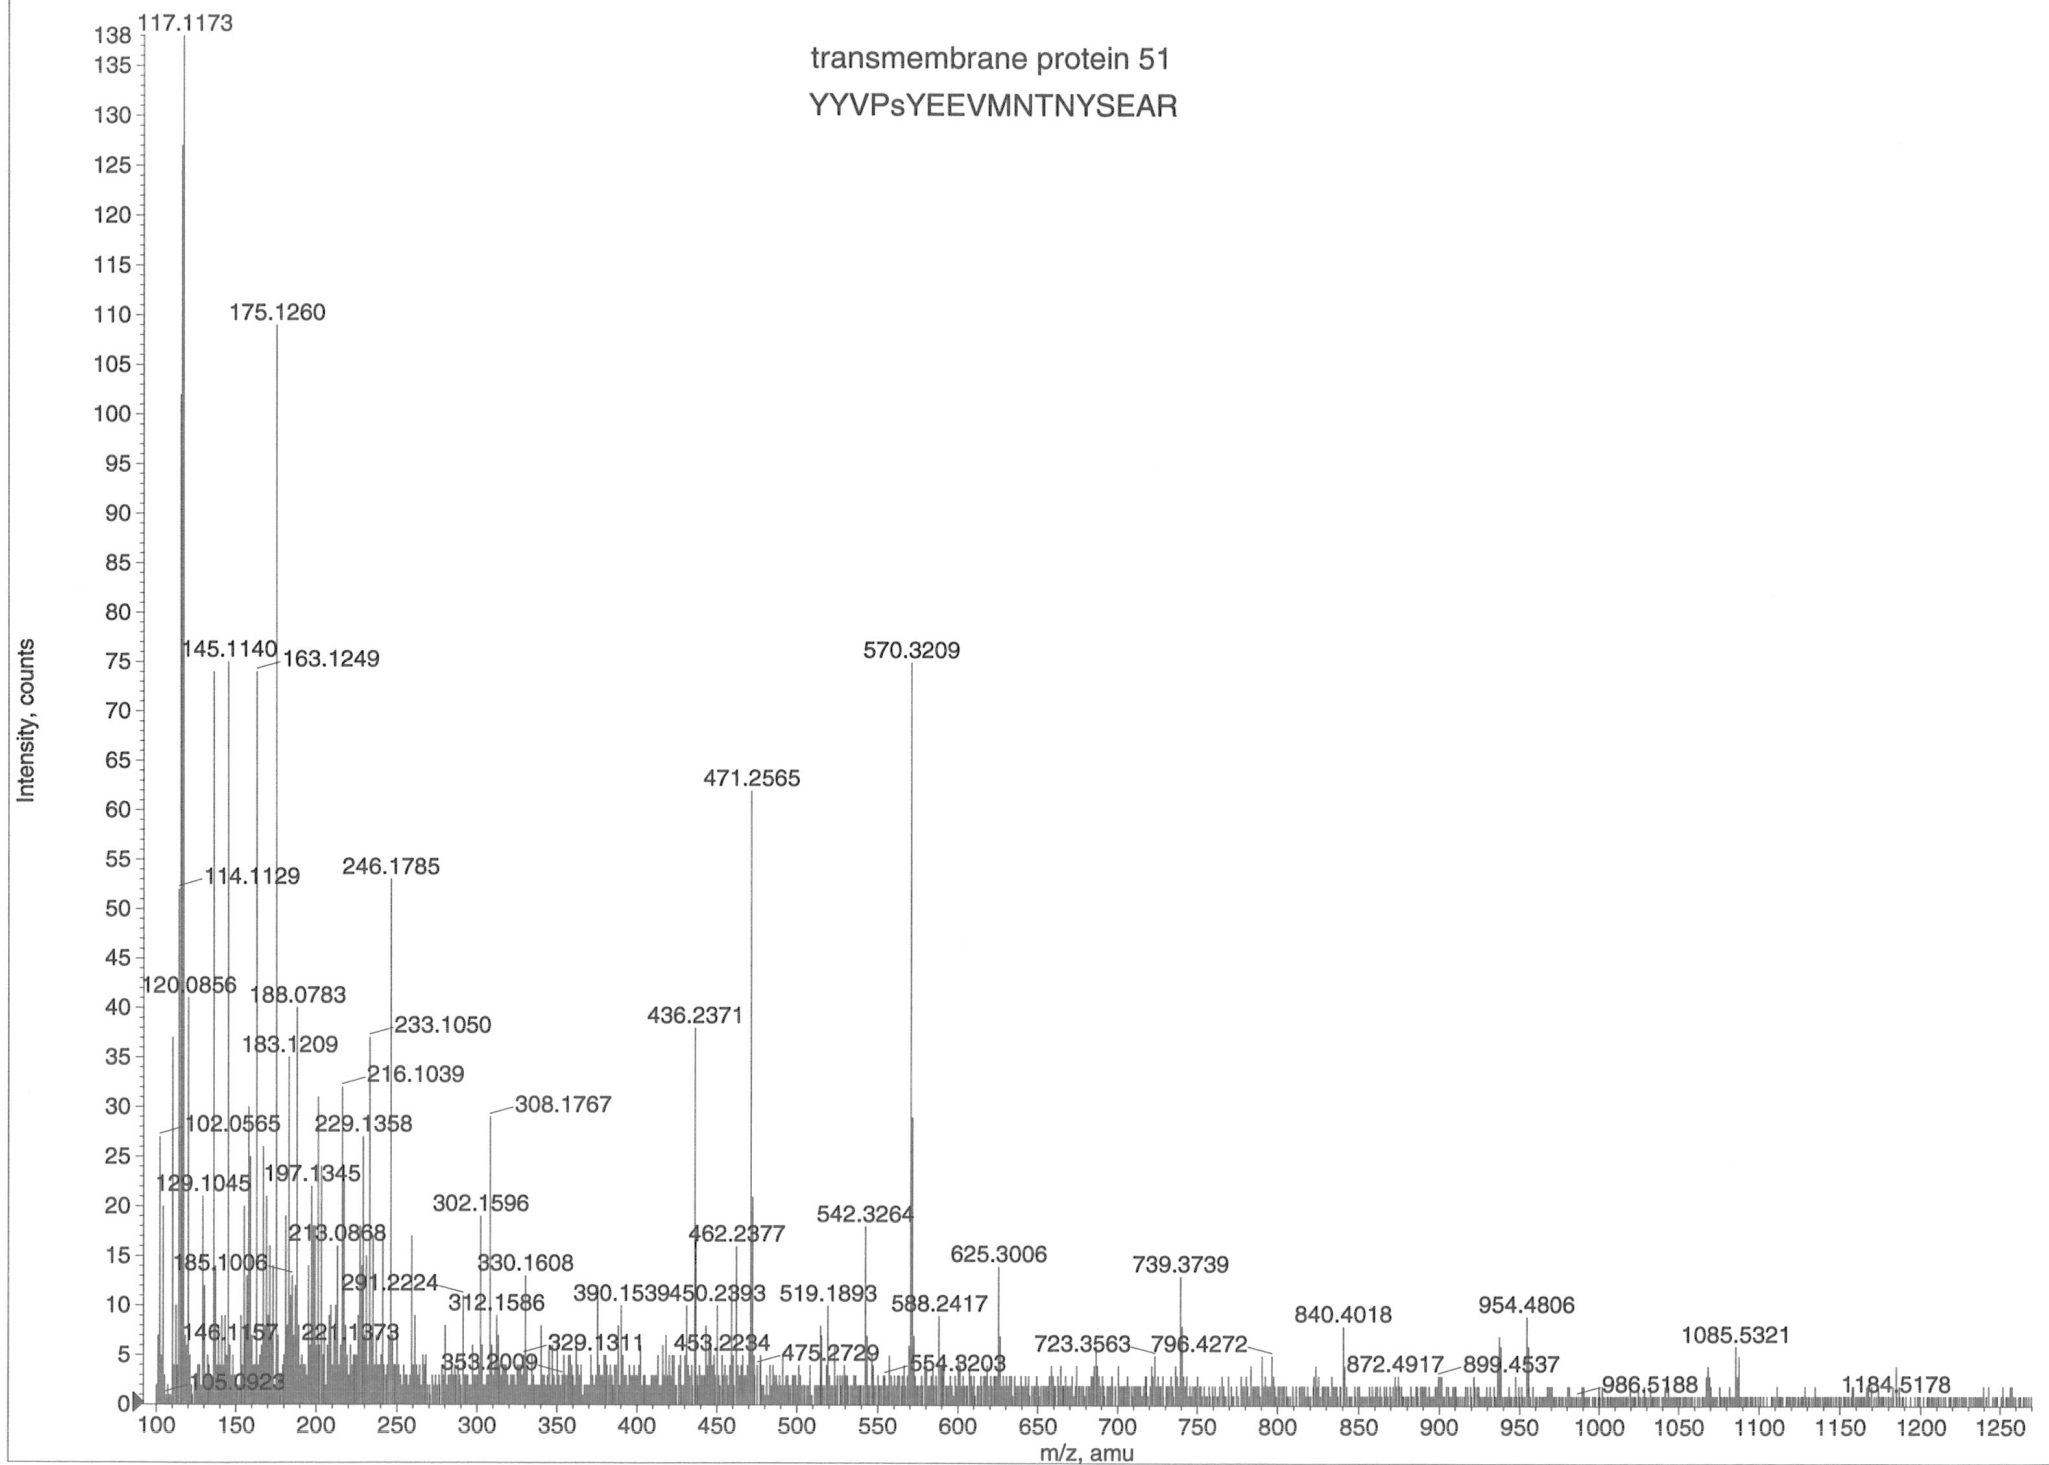

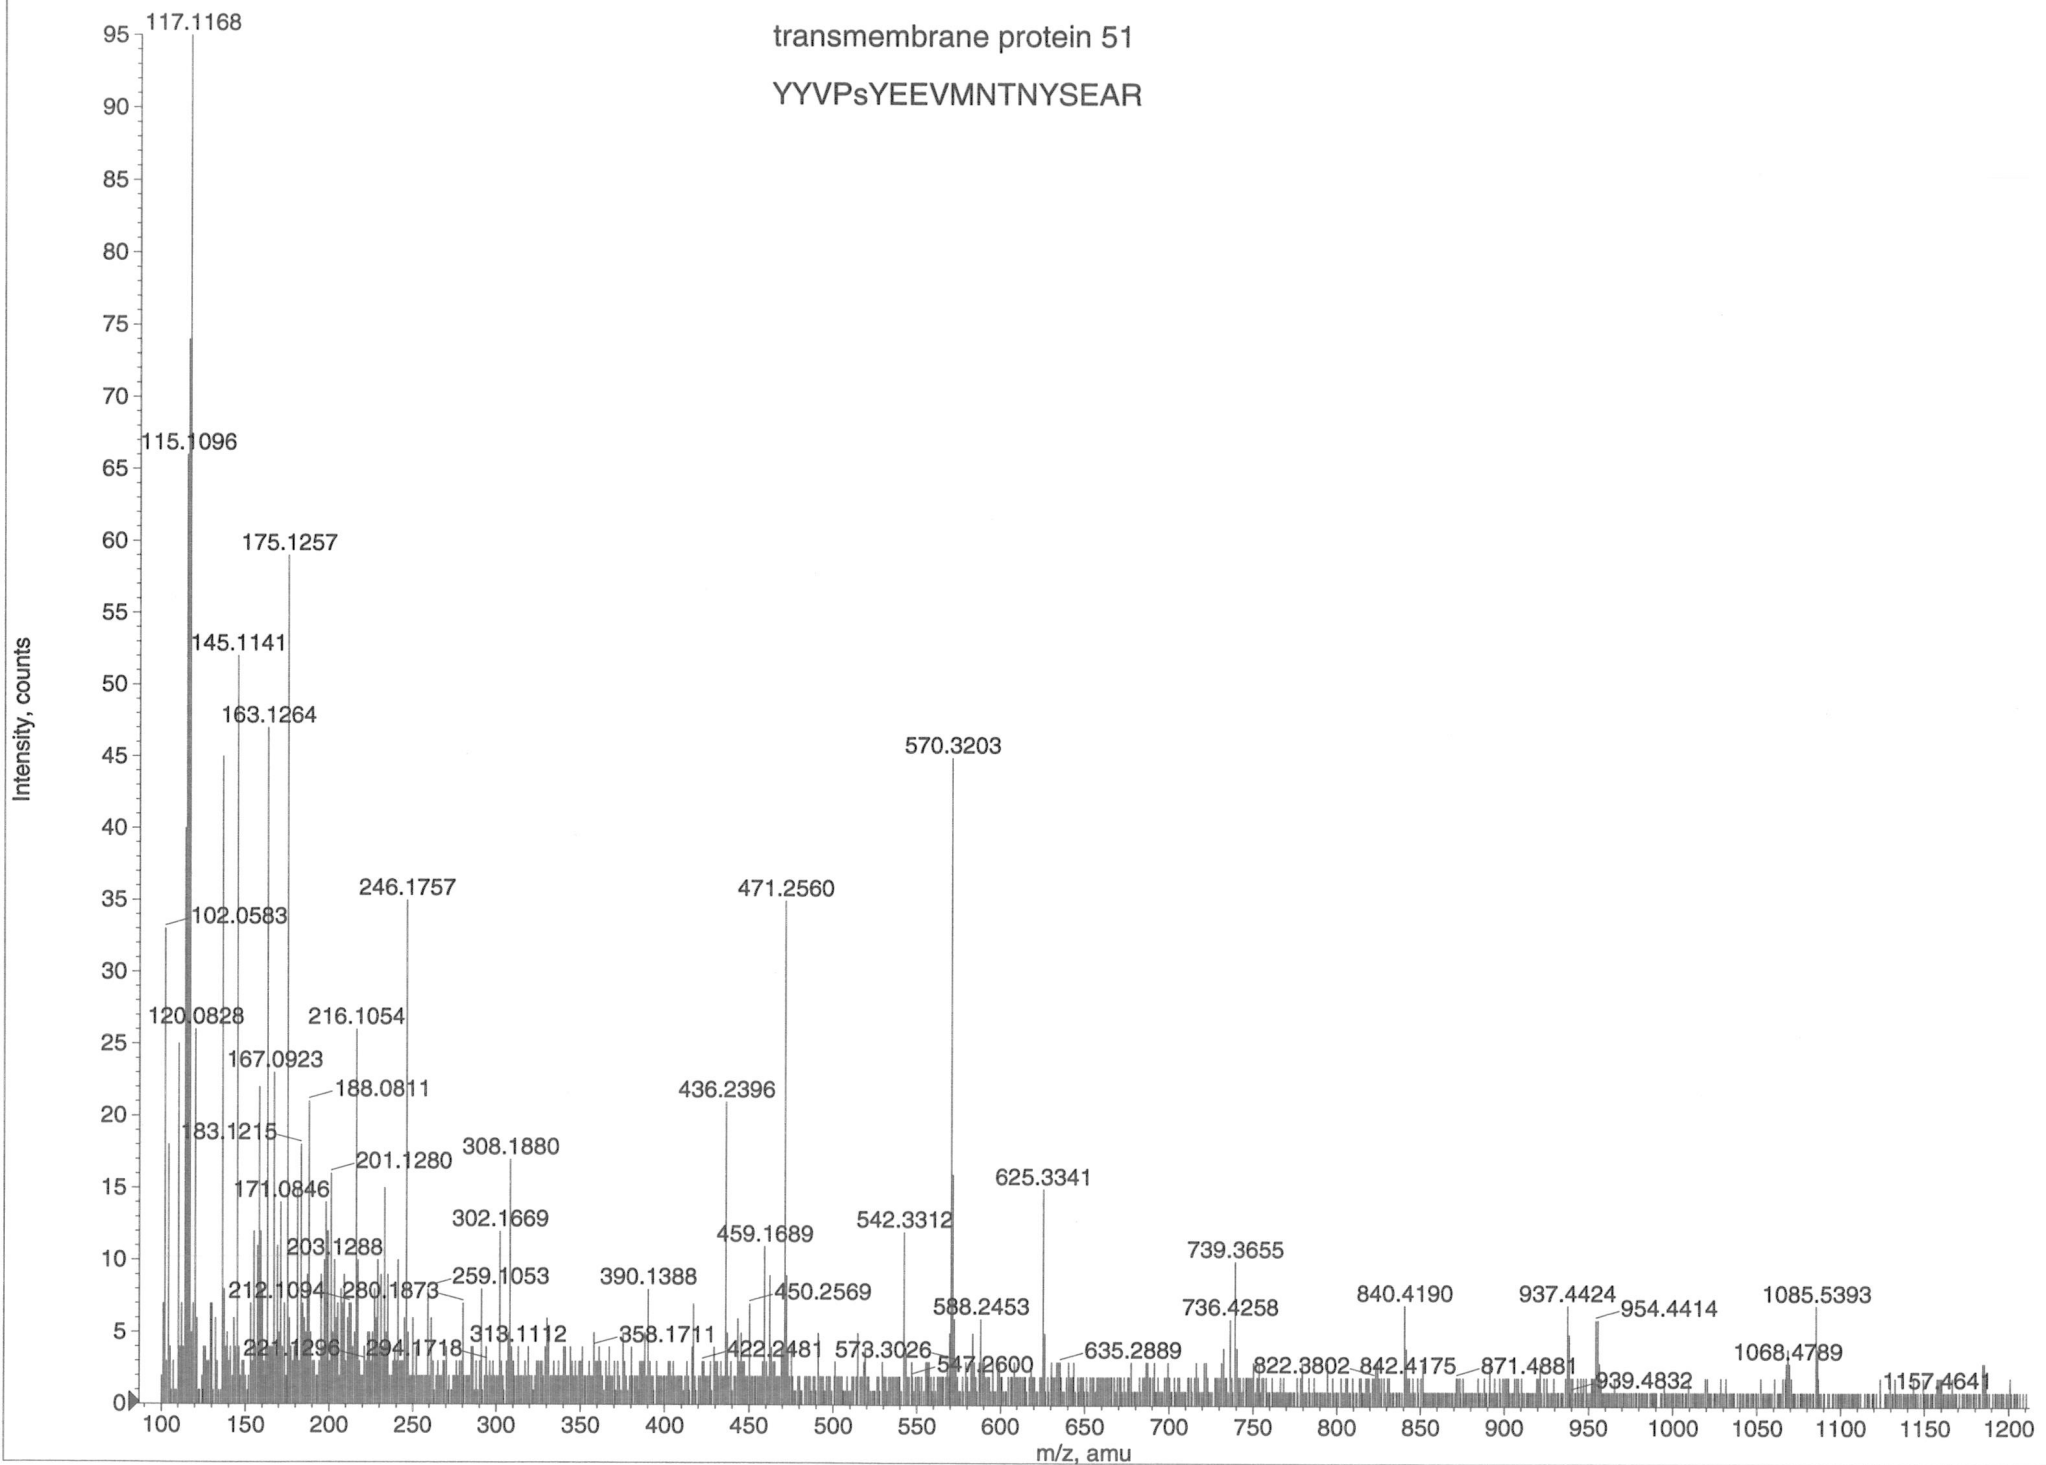

DNA topoisomerase II, beta isozyme  
ASPITNDGEDEFVPSDGLDKDEYTFSPGK

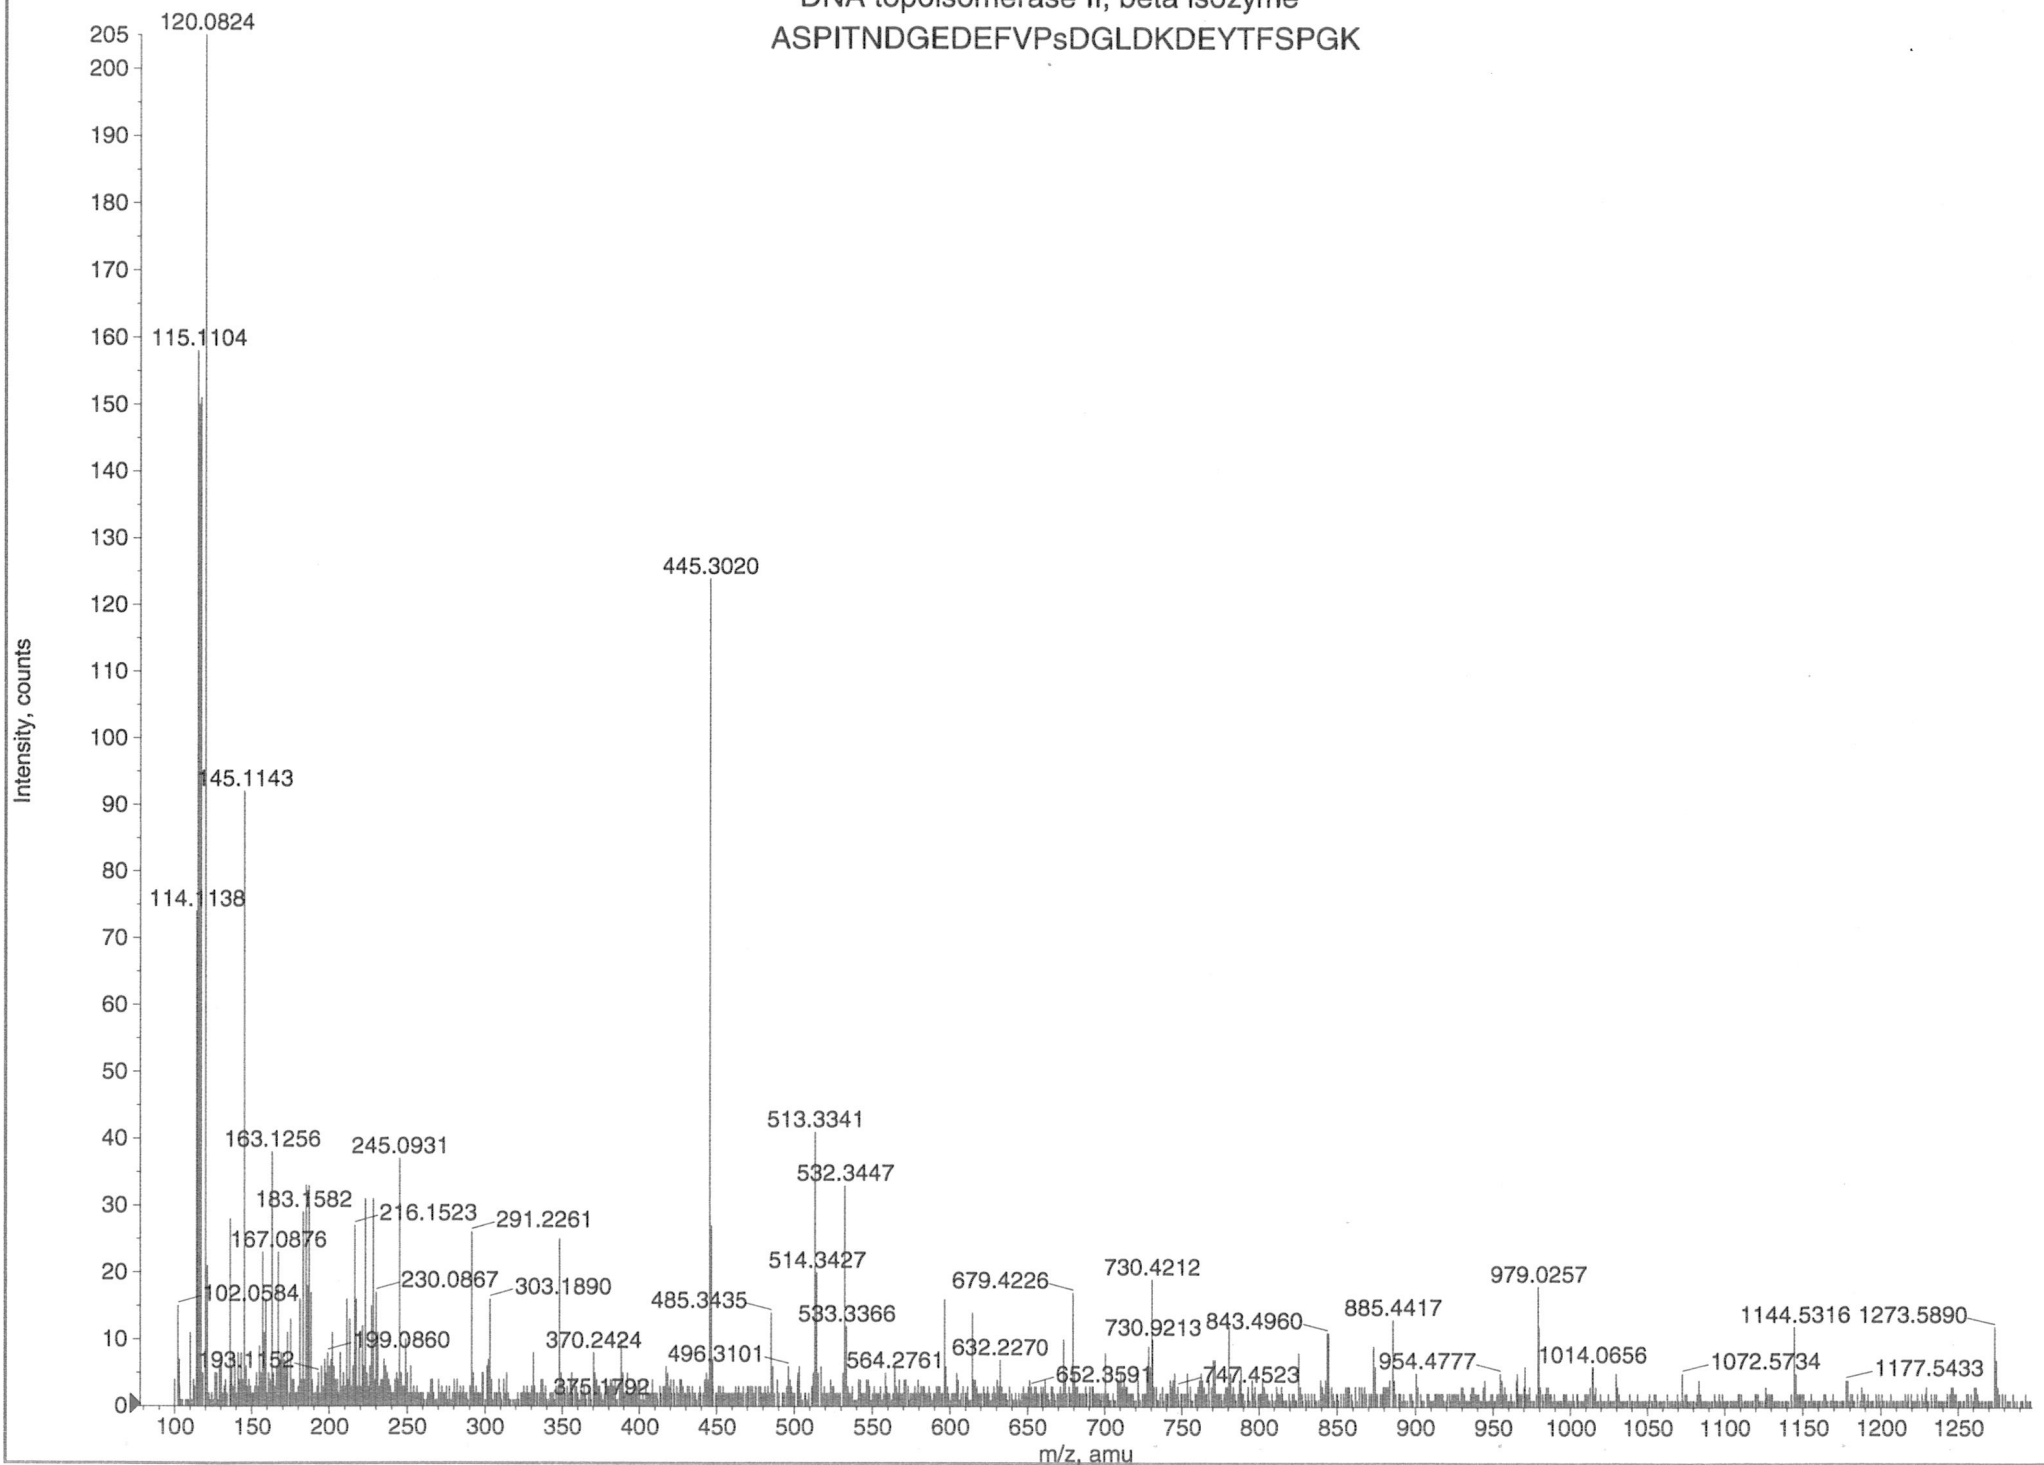

DNA topoisomerase II, beta isozyme  
ASPITNDGEDEFVPSDGLDKDEYTFSPGK

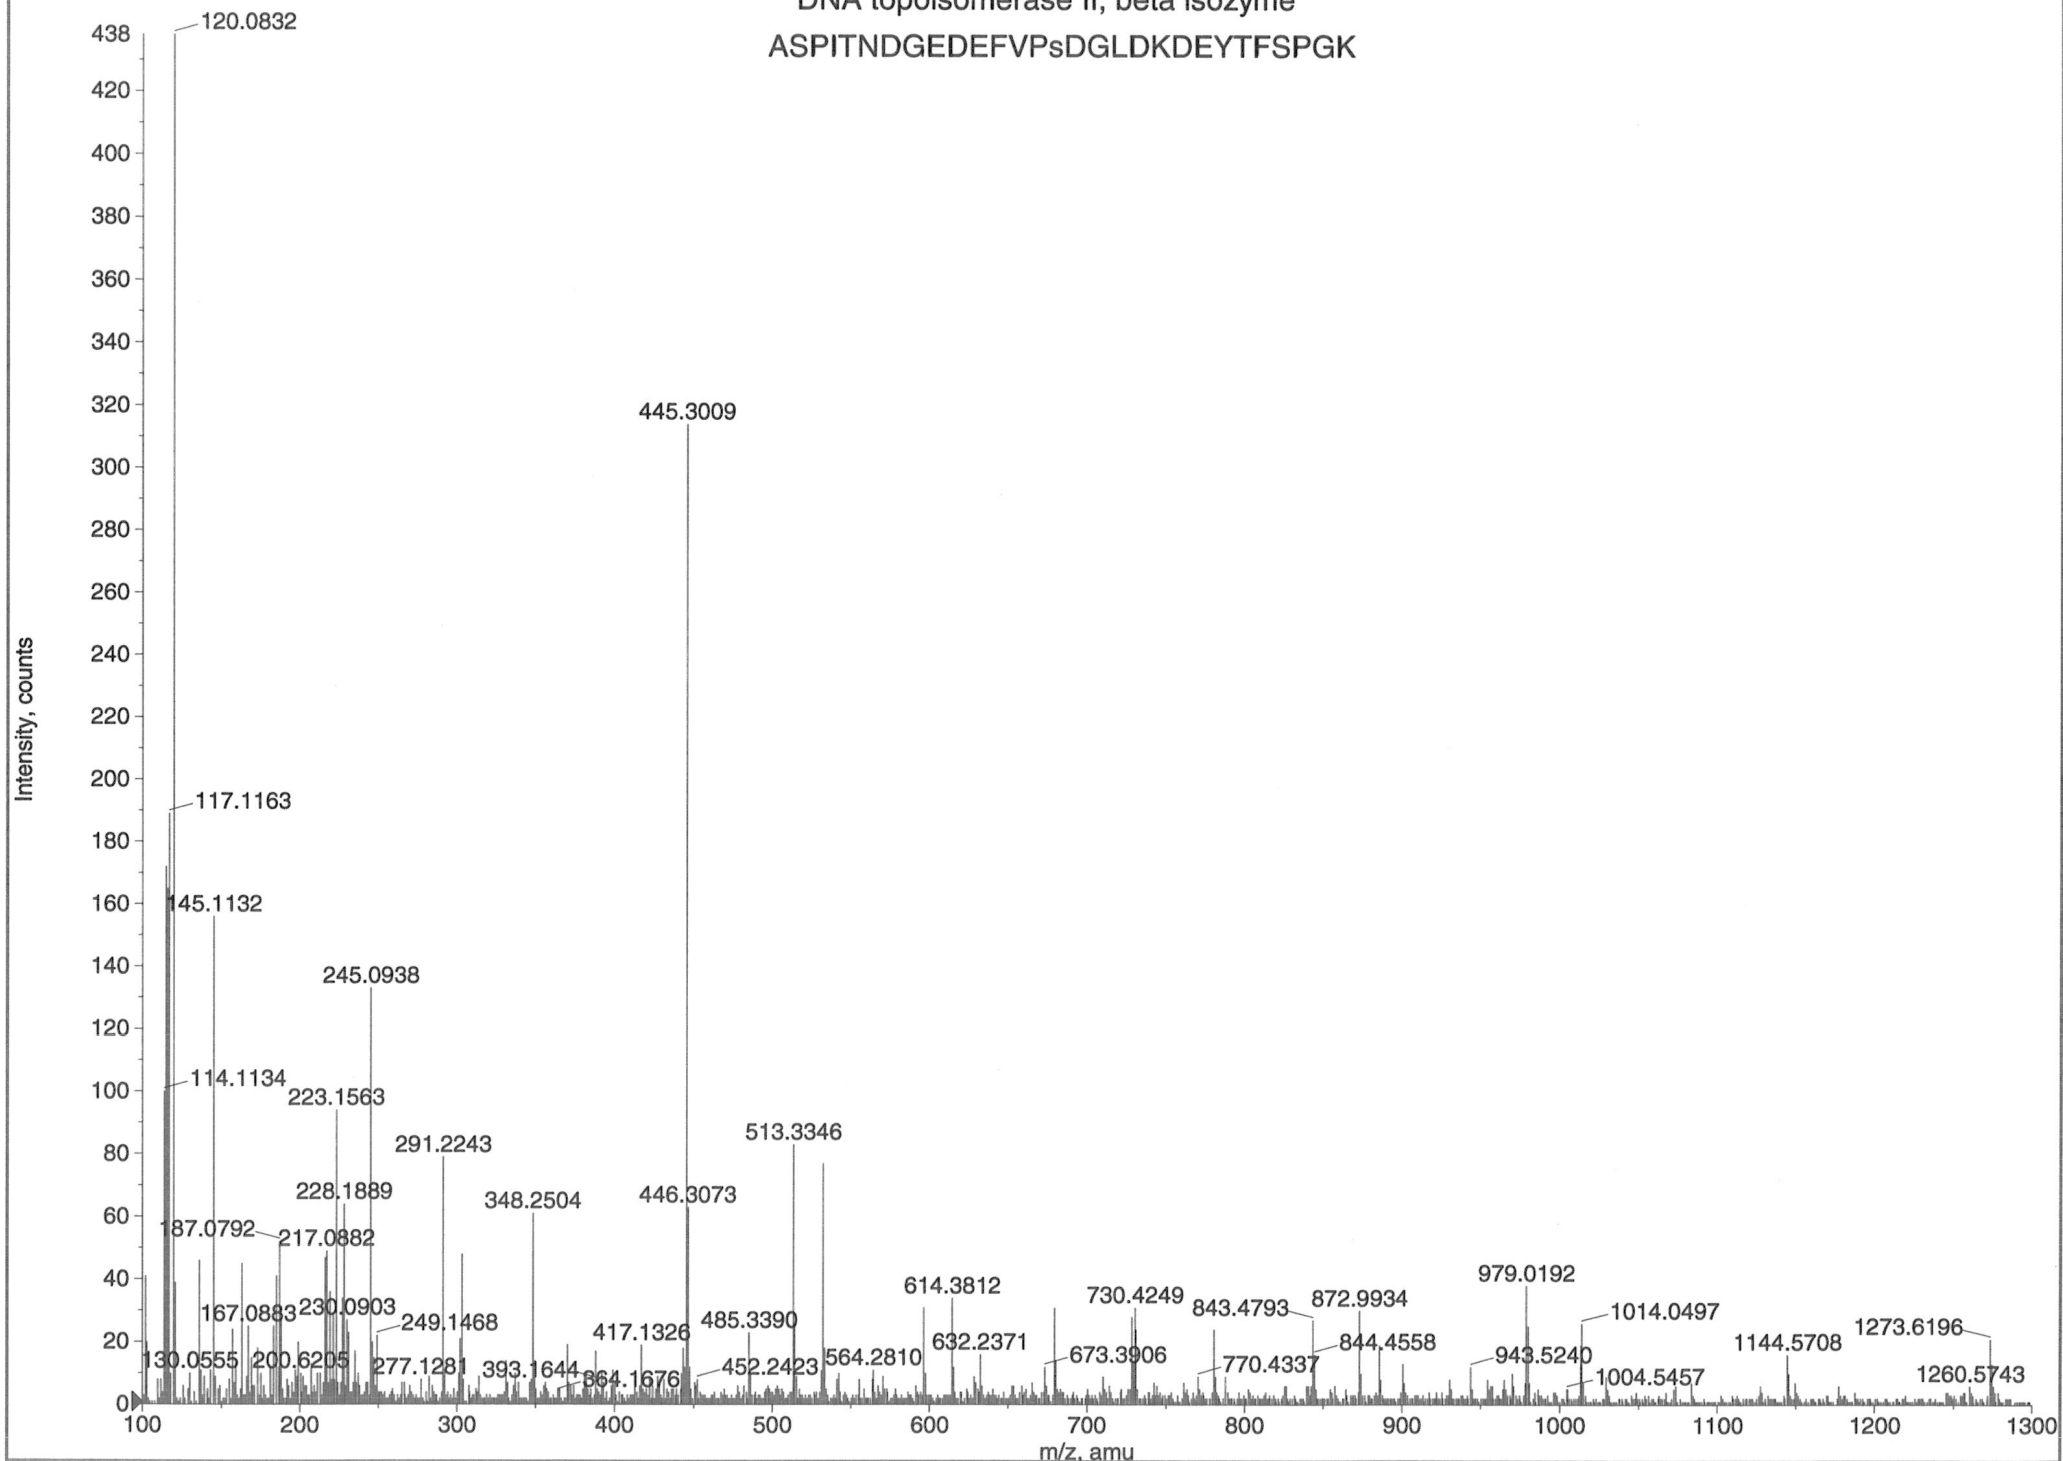

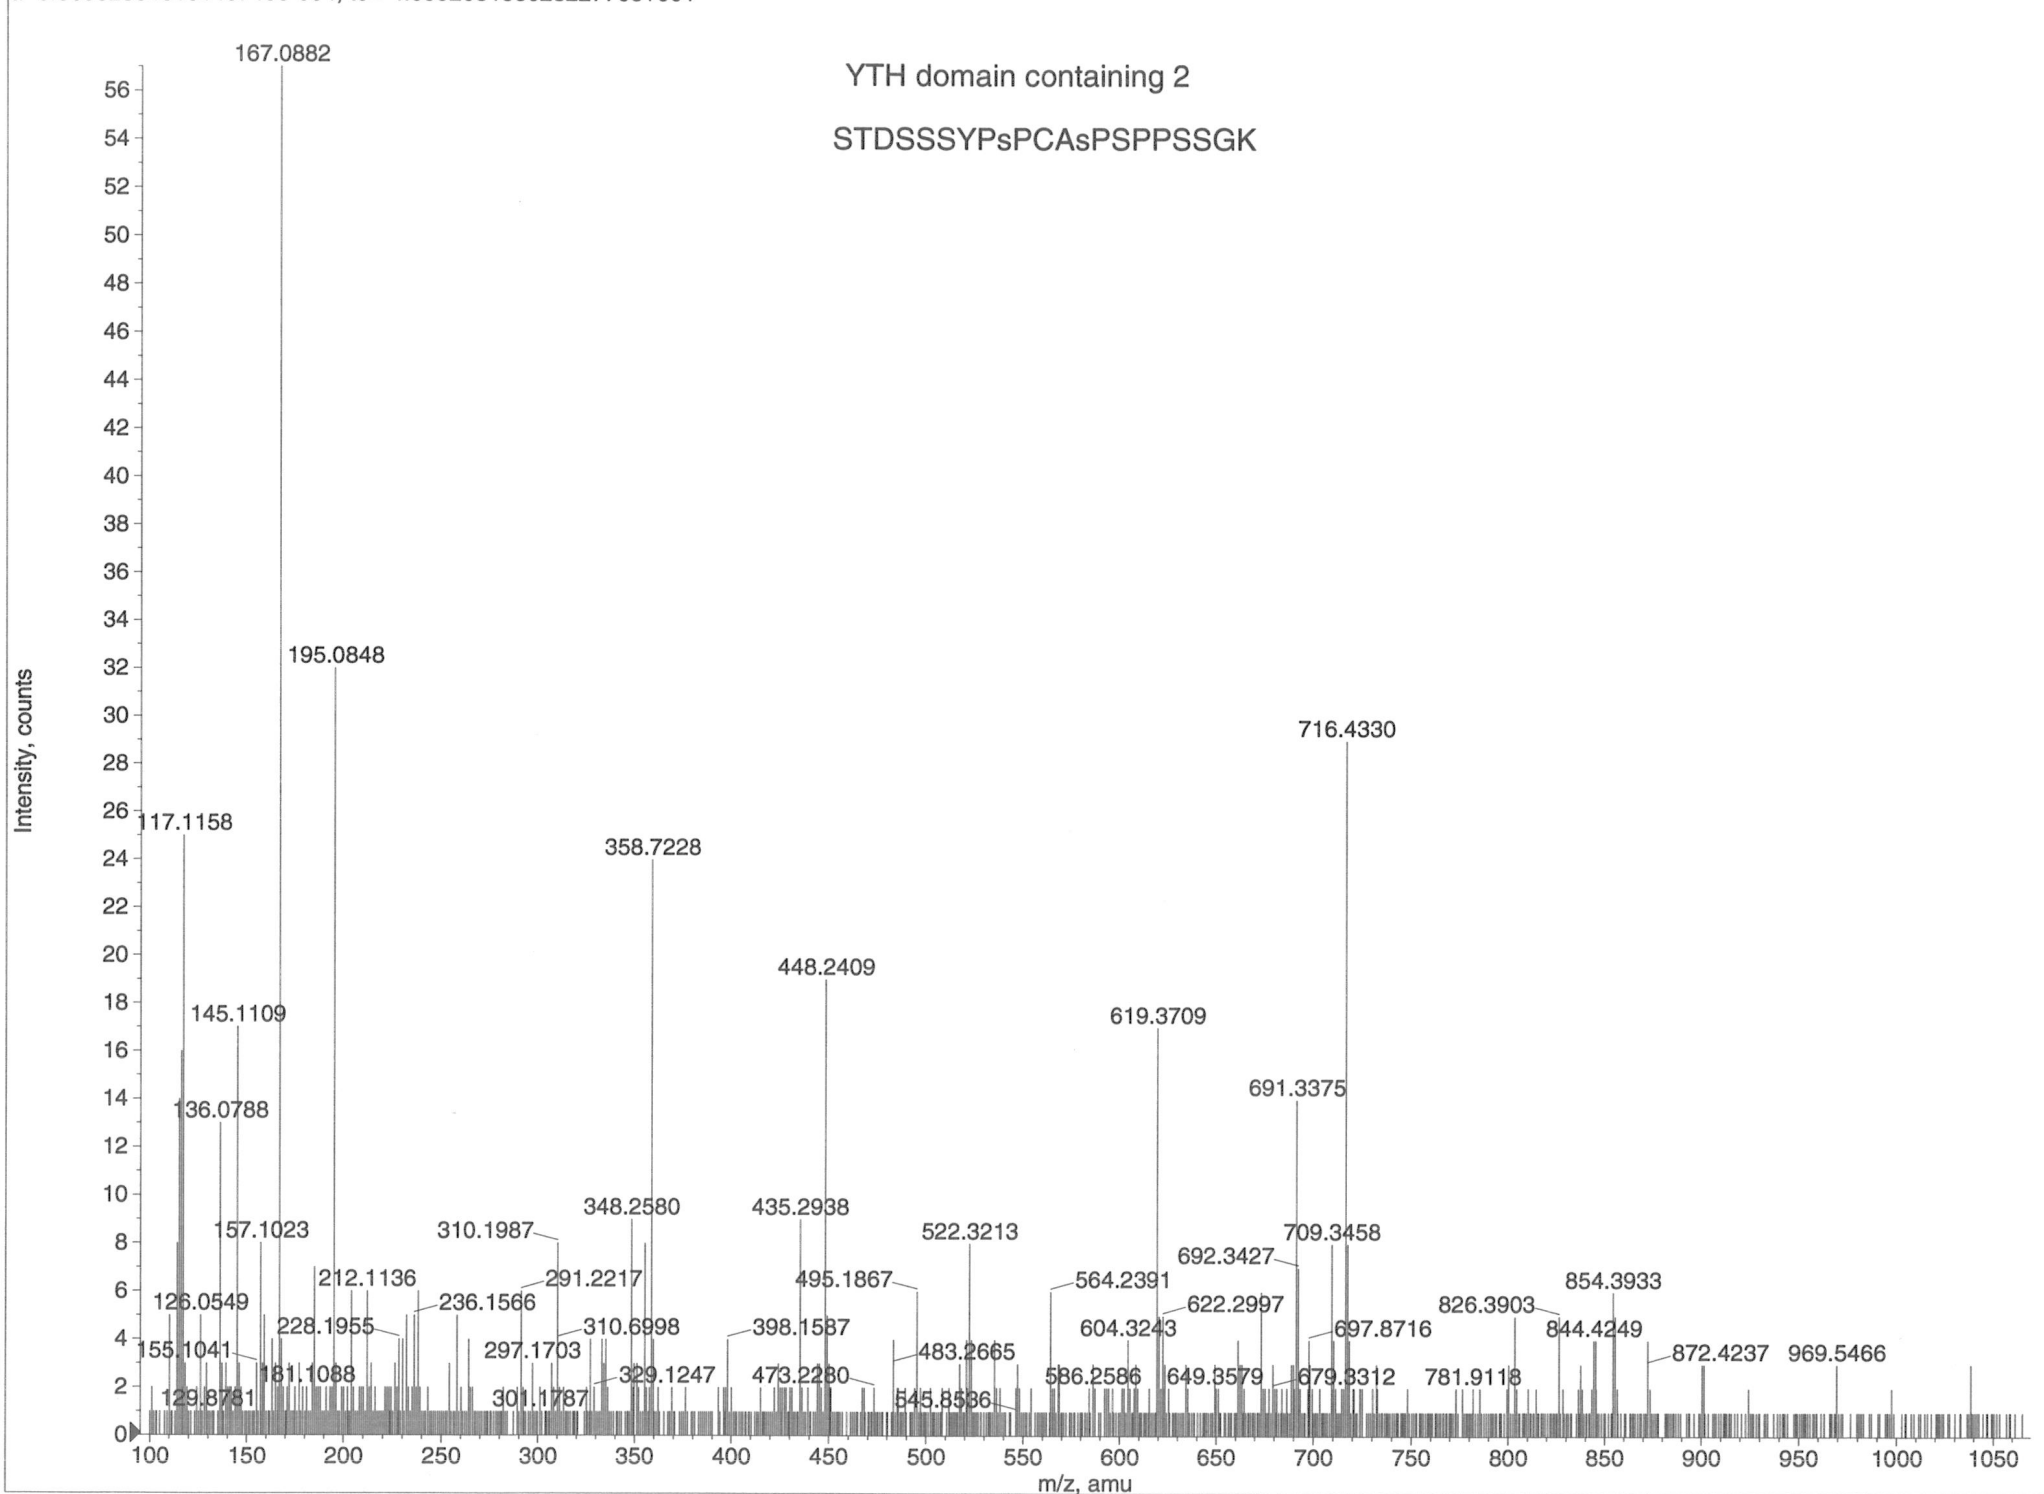

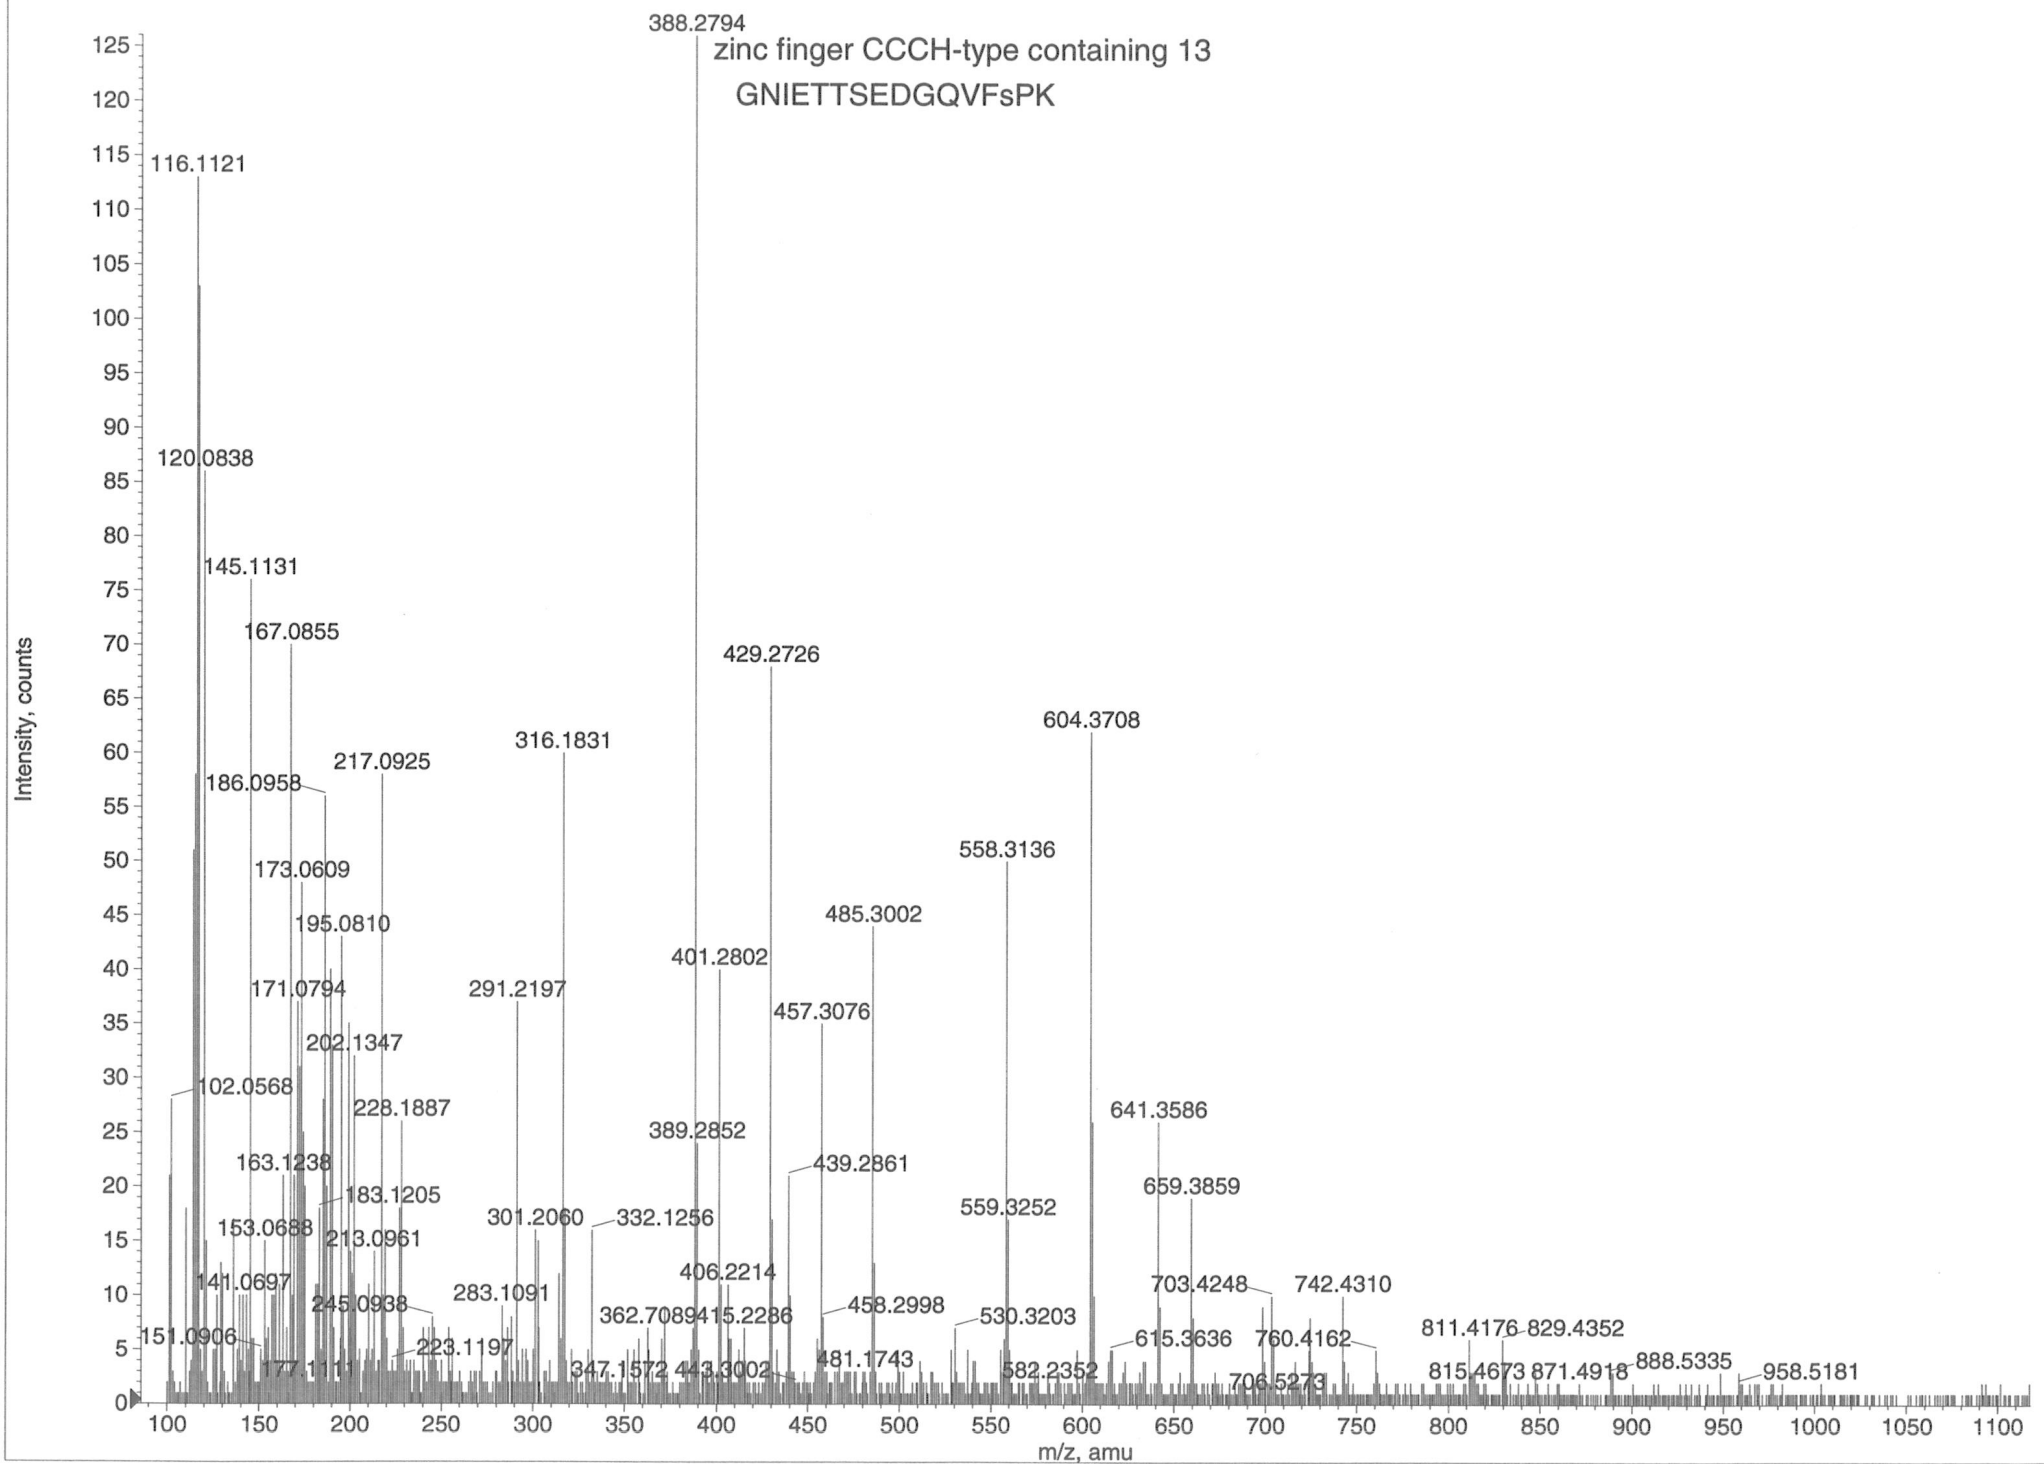



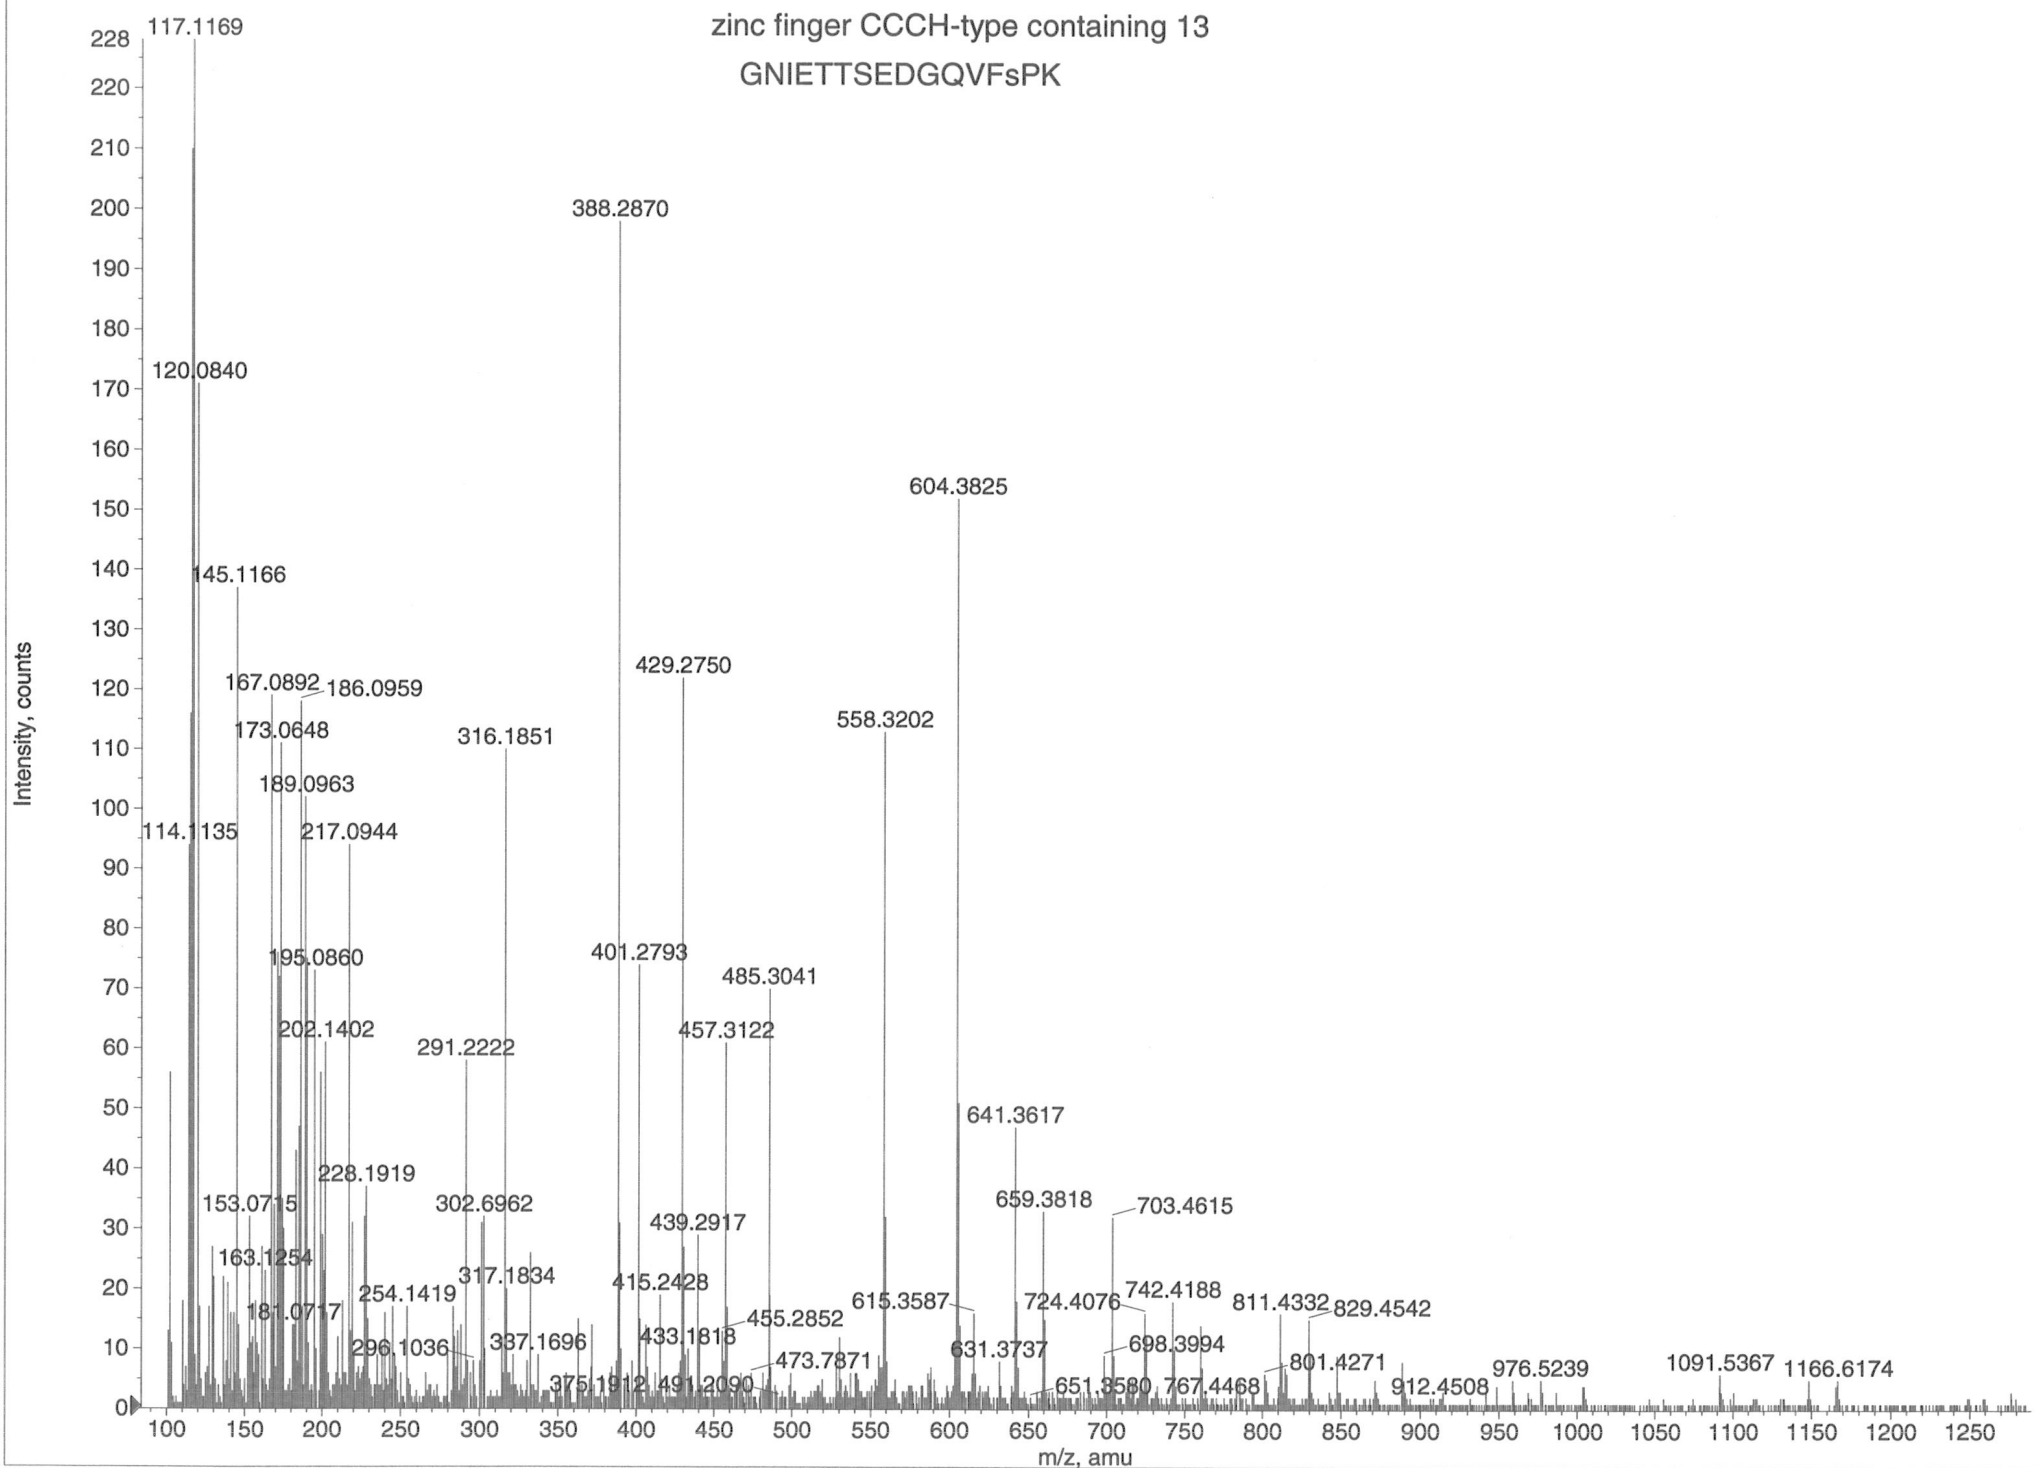

Supplement: b815075c_2.pdf [file b815075c_2.pdf]
