# Supplementary material for: An integrated comparative phosphoproteomic and bioinformatic approach reveals a novel class of MPM-2 motifs upregulated in EGFRvIII-expressing glioblastoma cells
Source: Royal Society of Chemistry journal article supplement (doi:10.1039/b815075c), 2008-10-30
Supplement: b815075c_1.pdf [file b815075c_1.pdf]

**Table S2. Motifs significantly enriched among top quartile of MPM-2 antigen peptides upregulated in U87-M cells vs. U87-DK controls.**

| Motif <sup>1</sup> | Motif in Foreground | Motif in Background | Foreground Size | Background Size | Statistical Significance |
|--------------------|---------------------|---------------------|-----------------|-----------------|--------------------------|
| xD.E.E             | 6                   | 6                   | 25              | 95              | 2.04x10 <sup>-4</sup>    |
| x-.E.-             | 8                   | 11                  | 25              | 95              | 8.24x10 <sup>-4</sup>    |
| S.....x-           | 5                   | 5                   | 25              | 95              | 9.17x10 <sup>-4</sup>    |
| xD.E.-             | 7                   | 9                   | 25              | 95              | 1.05x10 <sup>-3</sup>    |
| PY..s              | 6                   | 7                   | 25              | 95              | 1.17x10 <sup>-3</sup>    |
| S....xO            | 6                   | 8                   | 25              | 95              | 3.80x10 <sup>-3</sup>    |
| S.....s..-         | 4                   | 4                   | 25              | 95              | 3.97x10 <sup>-3</sup>    |
| S.....s-           | 4                   | 4                   | 25              | 95              | 3.97x10 <sup>-3</sup>    |
| -.sD.E.E           | 4                   | 4                   | 25              | 95              | 3.97x10 <sup>-3</sup>    |
| S....x.L           | 4                   | 4                   | 25              | 95              | 3.97x10 <sup>-3</sup>    |
| S....x.....O       | 4                   | 4                   | 25              | 95              | 3.97x10 <sup>-3</sup>    |
| S.....xD           | 4                   | 4                   | 25              | 95              | 3.97x10 <sup>-3</sup>    |
| D.xD               | 4                   | 4                   | 25              | 95              | 3.97x10 <sup>-3</sup>    |
| FxD.E.-            | 4                   | 4                   | 25              | 95              | 3.97x10 <sup>-3</sup>    |
| xD.E-E             | 4                   | 4                   | 25              | 95              | 3.97x10 <sup>-3</sup>    |
| x-                 | 11                  | 23                  | 25              | 95              | 9.36x10 <sup>-3</sup>    |
| xP                 | 13                  | 64                  | 25              | 95              | 0.983                    |

<sup>1</sup> “s” = pS; “x” = pS/pT, “.” = Any amino acid, “-” = D/E, “O” = M/I/L/V

**Table S3. Motifs significantly enriched among top quartile of MPM-2 antigen peptides upregulated in U87-SH cells vs. U87-DK controls.**

| Motif <sup>1</sup> | Motif in Foreground | Motif in Background | Foreground Size | Background Size | Statistical Significance |
|--------------------|---------------------|---------------------|-----------------|-----------------|--------------------------|
| D.x                | 8                   | 10                  | 25              | 95              | 2.73x10 <sup>-4</sup>    |
| -.x-               | 8                   | 11                  | 25              | 95              | 8.24x10 <sup>-4</sup>    |
| -.D.x              | 5                   | 5                   | 25              | 95              | 9.17x10 <sup>-4</sup>    |
| -.s--              | 7                   | 9                   | 25              | 95              | 1.05x10 <sup>-3</sup>    |
| D.x-               | 6                   | 7                   | 25              | 95              | 1.17x10 <sup>-3</sup>    |
| -.x                | 11                  | 20                  | 25              | 95              | 2.02x10 <sup>-3</sup>    |
| .x-                | 12                  | 23                  | 25              | 95              | 2.09x10 <sup>-3</sup>    |
| -.s                | 9                   | 15                  | 25              | 95              | 2.83x10 <sup>-3</sup>    |
| D.s                | 6                   | 8                   | 25              | 95              | 3.80x10 <sup>-3</sup>    |
| -.s-.E             | 6                   | 8                   | 25              | 95              | 3.80x10 <sup>-3</sup>    |
| -.-.x              | 6                   | 8                   | 25              | 95              | 3.80x10 <sup>-3</sup>    |
| -.xD               | 6                   | 8                   | 25              | 95              | 3.80x10 <sup>-3</sup>    |
| -.sD.E.E           | 4                   | 4                   | 25              | 95              | 3.97x10 <sup>-3</sup>    |
| sD.-.-O            | 4                   | 4                   | 25              | 95              | 3.97x10 <sup>-3</sup>    |
| -.D.x-             | 4                   | 4                   | 25              | 95              | 3.97x10 <sup>-3</sup>    |
| D.xD               | 4                   | 4                   | 25              | 95              | 3.97x10 <sup>-3</sup>    |
| -.XsP.S            | 4                   | 4                   | 25              | 95              | 3.97x10 <sup>-3</sup>    |
| D.s-.E             | 5                   | 6                   | 25              | 95              | 4.48x10 <sup>-3</sup>    |
| -.sD.-.-           | 5                   | 6                   | 25              | 95              | 4.48x10 <sup>-3</sup>    |
| -.s-L-             | 5                   | 6                   | 25              | 95              | 4.48x10 <sup>-3</sup>    |
| xD.E.E             | 5                   | 6                   | 25              | 95              | 4.48x10 <sup>-3</sup>    |
| s-                 | 10                  | 19                  | 25              | 95              | 5.81x10 <sup>-3</sup>    |
| xD.-.-             | 7                   | 11                  | 25              | 95              | 6.47x10 <sup>-3</sup>    |
| s.-.-              | 9                   | 17                  | 25              | 95              | 9.30x10 <sup>-3</sup>    |
| sD.-.-             | 6                   | 9                   | 25              | 95              | 9.30x10 <sup>-3</sup>    |
| -.x                | 6                   | 9                   | 25              | 95              | 9.30x10 <sup>-3</sup>    |
| x.-.-              | 10                  | 20                  | 25              | 95              | 9.60x10 <sup>-3</sup>    |
| xP                 | 12                  | 63                  | 25              | 95              | 0.995                    |

<sup>1</sup>“s” = pS; “x” = pS/pT, “.” = Any amino acid, “-” = D/E, “O” = M/I/L/V
